# Supplementary material for: A sensitive repeat identification framework based on short and long reads
Source: PubMed Central journal article supplement — Nucleic Acids Res. 2021 Jul 2;49(17):e100. doi: 10.1093/nar/gkab563 (PMC8464074; doi:10.1093/nar/gkab563), 2021-07-02
Supplement: gkab563_supplemental_file.pdf [file gkab563_supplemental_file.pdf]

# Supplementary Materials of 'A sensitive repeat identification framework based on short and long reads'

Xingyu Liao<sup>1,2</sup>, Min Li<sup>1</sup>, Kang Hu<sup>1</sup>, Fang-Xiang Wu<sup>3</sup>, Xin Gao<sup>2</sup>(✉) and Jianxin Wang<sup>1</sup>(✉)

<sup>1</sup> Hunan Provincial Key Lab on Bioinformatics, School of Computer Science and Engineering, Central South University, ChangSha, 410083, CHINA.

[liaoxingyu@csu.edu.cn](mailto:liaoxingyu@csu.edu.cn), [limin@mail.csu.edu.cn](mailto:limin@mail.csu.edu.cn), [Kanghu@csu.edu.cn](mailto:Kanghu@csu.edu.cn), [jxwang@mail.csu.edu.cn](mailto:jxwang@mail.csu.edu.cn)

<sup>2</sup> Computational Bioscience Research Center (CBRC), Computer, Electrical and Mathematical Sciences and Engineering Division, King Abdullah University of Science and Technology(KAUST), Thuwal 23955, Saudi Arabia.  
[xin.gao@kaust.edu.sa](mailto:xin.gao@kaust.edu.sa)

<sup>3</sup> Division of Biomedical Engineering, University of Saskatchewan, Saskatchewan, S7N 5A9, Canada.  
[faw341@mail.usask.ca](mailto:faw341@mail.usask.ca)

## 1 Introduction

The genomes of all eukaryotes contain a certain proportion of repetitive elements, particularly mammals in which repeats account for 25-50% of their entire genomes[1],[2]. Repetitive regions can be caused by various mechanisms, such as chromosome translocations, transposons, errors in replication and recombination, etc[3]. Numerous studies have shown that the repetitive elements in the genome play indispensable roles in the evolution, inheritance, variation, gene expression, transcriptional regulation, chromosome construction, and physiological metabolism of living organisms[4],[5],[6],[7], and they are one of the principal causes of genomic instability[8]. How to quickly, accurately and completely identify repetitive regions in genomes has become an important research topic in bioinformatics.

### 1.1 Classification of the Repetitive DNA Sequence

According to the arrangement, the repetitive regions in eukaryotic genomes can be divided into two types: tandem repeats and interspersed repeats[9], just as shown in Table S1. Tandem repeats are arrays in which repeating elements consisting of 1 to 500 bp sequences are connected end to end to form multiple repeats. They are arranged in clusters in the telomere, the centromere peripheral region and the heterochromatin region on the chromosome arm[10]. They are widely found in the genomes of eukaryotes and certain prokaryotes. The tandem repeats are distributed in both coding regions and non-coding regions[11]. For example, rRNA genes, tRNA genes and histone genes appear in the coding regions in the form of tandem repetitive sequences. Satellite (satellite DNA), small Satellite (minisatellite DNA) and microsatellite DNA (microsatellite DNA, Simple sequence repeats, SSR) are three common types of tandem repeats in non-coding regions.

The repeating elements of interspersed repeats are not connected, but are doped with other unrelated repeats or single copy sequences. They are dispersed throughout the genome and usually refer to transposons, including retrotransposons and DNA transposons[12]. There are two main types of retrotransposons. 1) long-terminal repeat retrotransposons (LTRs). The length of LTR retrotransposons generally ranges from 100 bp to 25 kb [13][14] and 2) non-long terminal repeat retrotransposons (Non-LTRs), which are divided into long interspersed nuclear elements (LINEs) and short interspersed nuclear elements (SINEs)[15]. LINE is a type of reverse transposon that can transpose spontaneously, which is the transcription product of RNA polymerase II. LINE does not contain long terminal repeats and can be up to several thousand base pairs in length. It present in all eukaryotic genomes, but only in a small percentage of plant genomes. The length of SINE is between 80 bp to 500 bp. It cannot be transposed autonomously, and there is no open reading frame. It is a product formed by RNA polymerase III and tends to be inserted into gene-rich regions. The DNA transposon is transposed by a cut-paste or copy-paste mechanism[16]. Such elements are excised from the chromosome by interleaved double-stranded cleavage and reinserted into other locations in the genome without the involvement of RNA. They contain a transcriptase and the inverted repeats at both ends, which are transposed between the chromosome autochromatin segments. DNA transposons can be divided into three categories according to the inverted repeat sequences, which are AC/Ds (11bp), CATA (up to 15.2 bp) and small reverse repeat factor MITE (8bp to 12bp terminal reverse repeat).

**Table S1.** Repetitive sequence classification.

| Type         | Subtype          |          | Length(bp) | Distribution region        |                        |
|--------------|------------------|----------|------------|----------------------------|------------------------|
| Interspersed | retrotransposons | Non-LTRs | LINE       | 500~4,000                  | Scattered distribution |
|              |                  |          | SINE       | < 500                      | Scattered distribution |
|              | DNA transposons  | LTRs     | LTR        | 100~5,000                  | Two ends of retrovirus |
|              |                  |          | AC/Ds      | 11bp                       | Scattered distribution |
| Tandem       | Satellite        |          | 150~500    | Heterochromatin            |                        |
|              | Minisatellite    |          | 10~100     | Euchromatin                |                        |
|              | Microsatellite   |          | 2~10       | Non-coding region, introns |                        |

'Non-LTRs' Non-long terminal repeat retrotransposons. 'LTRs' indicates Long-terminal repeat retrotransposons. 'LINE' indicates long interspersed nuclear element. 'SINE' indicates short interspersed nuclear element. 'MITE' indicates miniature inverted repeat element.

### 1.2 Classification of existing detection methods

Many computational methods have been proposed to identify repetitive regions in genomes, which can be classified into three categories including homology-based, structure-based and *de novo* methods. The general classification of detection methods is shown in Fig. S1. The homology-based identification methods

are based on a certain database for the homology search, so as to find and mask the repetitive sequences. RepeatMasker[17] is a representative method of this category, which performs a similarity search based on the local alignment with AB-BLAST[18] or Crossmatch[19]. RepeatMasker has its own library of repetitive sequences, and has become a gold standard of this field in terms of accuracy. Most other similar methods use RepeatMasker as the main reference library. The homology-based methods have the high search efficiency and can be used to discover families with small numbers of copies. However, everything has two sides, such methods can only be used to search for known repetitive sequences, and can not be used to discover new repetitive sequences. Typical methods based on the homologous search are also include: Censor[20], TESeeker[21], Greedier[22], Greedier[23] and T-lex[24]. Among them, CENSOR is a program designed to identify and eliminate fragments of DNA sequences homologous to any chosen reference sequences, in particular to repetitive elements, which uses RepBase as a homologous database; TESeeker implements an automated homology-based approach for identifying transposable elements, which uses Tefam and RepBase as homologous databases; Greedier effectively solves the problem of embedded duplications by using greedy algorithms and local alignment methods; and T-lex uses high-throughput sequencing data to find tandem repetitive flanking regions, non-LTR and fragment repeat regions.

The structure-based identification methods are based on the prior information of the sequence structure features, using a heuristic algorithm to find and identify the repeated sequences, the types of repeat sequences that can be found are determined by the sequence characteristics they have mastered[25]. Sequence characteristics refer to the sequence structure features obtained through biological means, such as the structure of the translocation factor, and the conserved protein functional domain. The structure-based identification methods also need the support of a known library which was originally constructed by biologists through manual annotation. With the rapid development of machine learning and deep learning technologies, researcher have begun to propose some automatic labeling methods, such as using SVM to train a classification model using a standard structure-based repeated sequence library. The repeat type in here refers to the repeated fragments of different structural types in the known library. If the structural features of the query sequence cannot be found in any type of repeated fragments in the known library, the structure-based identification method cannot complete the detection of this query sequence. Typical structure-based methods include: LTRharvest[26], MASiVE[27], MGEScan-LTR[28], SINEDR[29], MITE-Hunter[30], detectMITE[31], FINDMITE[32], MUST[33], MITE-Digger[34] and MITE Tracker[35]. Among them, LTRharvest implements several steps of filtering based on structural features of sequences, determines the boundary position of the LTR, and annotates the LTR with LTRdigest. MASiVE is a tool specifically designed to analyze specific LTR transposons in plant genomes. MGEScan-LTR uses approximate string matching and protein domain analysis methods to determine intact LTR retrotransposons. Transposable elements (TEs) are a type of repeat sequences abundant in eukaryotic genomes. TEs play important roles in genome organization and evolution. Commonly, TEs in genomes can be classified into two major categories retrotransposons (Class I) and DNA transposons (Class II). Miniature inverted repeat transposable elements(MITEs) are a special type of DNA transposons. MITE-Hunter, detectMITE, FINDMITE, MUST, MITE-Digger and MITE-Hunter are six typical structure-based methods for MITEs identification, among which FINDMITE requires users to predefine the TSD sequences, TIR length and the minimum and maximum distances between the TIRs, MITE-Hunter is a program pipeline that can be used to identify MITEs as well as other small Class II non-autonomous TEs from genomic DNA datasets, compared to FINDMITE and MUST, MUST-Hunter has a much lower false-positive rate and the output is easier to be checked and classified. Both MITE-Hunter and MITE Digger utilized a mixture of both de novo and structural-based methods in MITE detection. Although they have successfully decreased false positive rates in MITE detection, both of them cannot detect all MITEs hidden in the genomes.

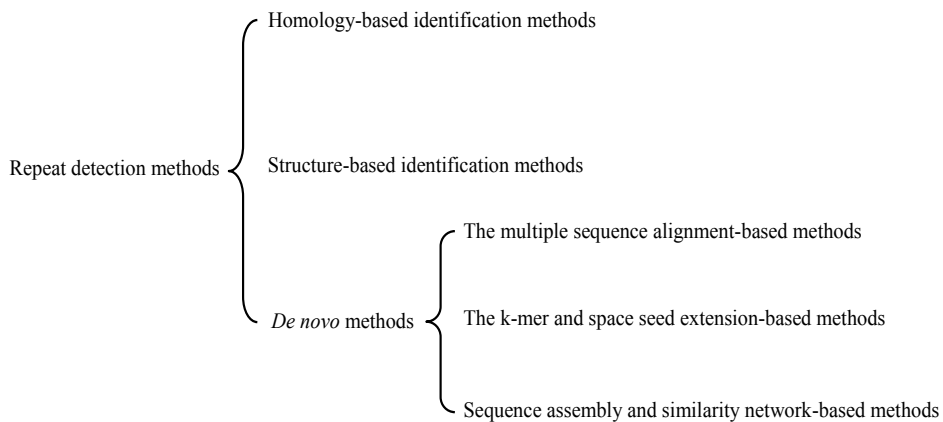

**Fig. S1.** The general classification of detection methods.

The *de novo* methods need no prior information of the repeat structure or similarity to the known repeat sequences, and tend to be more flexible than the other two methods[36]. The *de novo* methods can also be divided into three categories. The first category relies on the multiple sequence alignment to identify repeats, which mainly includes Repeat Pattern Toolkit[37], RECON[38], PILER[39], LTRdigest[40]. Among them, the tools in RPT (repeat pattern toolkit) include identifying significant local alignments (utilizing both two-way and three-way alignments), dividing the set of alignments into connected components (signifying repeat families), computing evolutionary distances between repeat family members, constructing minimum spanning trees from the connected components, and visualizing the evolution of the repeat families[41]. RECON uses WU-BLAST[42] as the initial alignment tool, which resolves the differentiation between segmental duplication and typical interspersed repeat such as TEs, by using the different distribution graphics of the two types of repeats upon the multiple sequence alignment. In the past few years, RECON has become the dominant tool for the *de novo* repeat family identification in newly sequenced genomes. For example, it has been used to construct a library of *C.briggsae* repeat families, making this an ideal test bed[43]. PILER adopts the pairwise alignment of long sequences to discover and distinguish between different types of repetitions,

**Table S2.** The detailed classification of existing detection methods.

| Types           | Tools                                                                                                                                                                                                   | Website                                                                                                                                         |
|-----------------|---------------------------------------------------------------------------------------------------------------------------------------------------------------------------------------------------------|-------------------------------------------------------------------------------------------------------------------------------------------------|
| homology-based  | RepeatMasker                                                                                                                                                                                            | <a href="http://www.repeatmask.org">http://www.repeatmask.org</a>                                                                               |
|                 | Censor                                                                                                                                                                                                  | <a href="http://www.girinst.org/censor/download.php">http://www.girinst.org/censor/download.php</a>                                             |
|                 | TESeeker                                                                                                                                                                                                | <a href="http://repository.library.nd.edu/view/16/index.html">http://repository.library.nd.edu/view/16/index.html</a>                           |
|                 | Greedier                                                                                                                                                                                                | <a href="https://omictools.com/greedier-tool">https://omictools.com/greedier-tool</a>                                                           |
|                 | T-lex                                                                                                                                                                                                   | <a href="http://petrov.standord.edu/cgi-bin/Tlex_manual.html">http://petrov.standord.edu/cgi-bin/Tlex_manual.html</a>                           |
|                 | Rteclass1                                                                                                                                                                                               | <a href="http://www.girinst.org/RTphylogeny/RTclass1">http://www.girinst.org/RTphylogeny/RTclass1</a>                                           |
|                 | RetroSeq                                                                                                                                                                                                | <a href="http://github.com/tk2/RetroSeq">http://github.com/tk2/RetroSeq</a>                                                                     |
|                 | SINEBase                                                                                                                                                                                                | <a href="http://sines.eimb.ru">http://sines.eimb.ru</a>                                                                                         |
|                 | TRANSP0                                                                                                                                                                                                 | <a href="http://algen.lsi.upc.es/recerca/search/transpo/transpo.html">http://algen.lsi.upc.es/recerca/search/transpo/transpo.html</a>           |
|                 | PLOTREP                                                                                                                                                                                                 | <a href="http://repeats.abc.hu/cgi-bin/plotrep.pl">http://repeats.abc.hu/cgi-bin/plotrep.pl</a>                                                 |
| TinT            | <a href="http://www.bioinformatics.uni-muenster.de/tools/tint/index.hbi?lang=en&amp;mscl=0&amp;cscl=0">http://www.bioinformatics.uni-muenster.de/tools/tint/index.hbi?lang=en&amp;mscl=0&amp;cscl=0</a> |                                                                                                                                                 |
| structure-based | TE Displayer                                                                                                                                                                                            | <a href="http://labs.csb.utoronto.ca/yang?TE_Displayer/TE_Displayer_1.0.2">http://labs.csb.utoronto.ca/yang?TE_Displayer/TE_Displayer_1.0.2</a> |
|                 | FINDMITE                                                                                                                                                                                                | <a href="http://www.biochem.vt.edu/yaedes">http://www.biochem.vt.edu/yaedes</a>                                                                 |
|                 | detectMITE                                                                                                                                                                                              | <a href="https://sourceforge.net/projects/detectmite">https://sourceforge.net/projects/detectmite</a>                                           |
|                 | LTR_STRUC                                                                                                                                                                                               | <a href="http://www.mcdonaldlab.biology.gatech.edu/ltr_struct.htm">http://www.mcdonaldlab.biology.gatech.edu/ltr_struct.htm</a>                 |
|                 | LTR_FINDER                                                                                                                                                                                              | <a href="http://tlife.fudan.edu.cn/tlife/ltr_finder/">http://tlife.fudan.edu.cn/tlife/ltr_finder/</a>                                           |
|                 | Retro Tector                                                                                                                                                                                            | <a href="http://retrotector.neuro.uu.se/pub/queue.php?show=submit">http://retrotector.neuro.uu.se/pub/queue.php?show=submit</a>                 |
|                 | RTAnalyzer                                                                                                                                                                                              | <a href="http://www.riboclub.org/cgi-bin/RTAnalyzer/index.pl">http://www.riboclub.org/cgi-bin/RTAnalyzer/index.pl</a>                           |
|                 | P-MITE                                                                                                                                                                                                  | <a href="http://pmite.hzau.edu.cn/django/mite">http://pmite.hzau.edu.cn/django/mite</a>                                                         |
|                 | TSDfinder                                                                                                                                                                                               | <a href="http://www.ncbi.nlm.nih.gov/CBBresearch/Landsman/TSDfinder">http://www.ncbi.nlm.nih.gov/CBBresearch/Landsman/TSDfinder</a>             |
|                 | MAK                                                                                                                                                                                                     | <a href="http://perl.idmb.tamu.edu/mak.htm">http://perl.idmb.tamu.edu/mak.htm</a>                                                               |
|                 | LTRharvest                                                                                                                                                                                              | <a href="http://www.zbh.uni-hamburg.de/ltrharvest">http://www.zbh.uni-hamburg.de/ltrharvest</a>                                                 |
|                 | MASIVE                                                                                                                                                                                                  | <a href="http://bat.ina.certh.gr/tools/masive/">http://bat.ina.certh.gr/tools/masive/</a>                                                       |
|                 | MGEScan-LTR                                                                                                                                                                                             | <a href="https://bio.tools/mgescan-ltr">https://bio.tools/mgescan-ltr</a>                                                                       |
| MITE-Hunter     | <a href="http://target.iplantcollaborative.org/mite_hunter.html">http://target.iplantcollaborative.org/mite_hunter.html</a>                                                                             |                                                                                                                                                 |
| MITE-Digger     | <a href="http://labs.csb.utoronto.ca/yang/MITEDigger">http://labs.csb.utoronto.ca/yang/MITEDigger</a>                                                                                                   |                                                                                                                                                 |
| <i>de novo</i>  | Repeat Pattern Toolkit                                                                                                                                                                                  | <a href="https://www.aaii.org/Papers/ISMB/1994/ISMB94-001.pdf">https://www.aaii.org/Papers/ISMB/1994/ISMB94-001.pdf</a>                         |
|                 | RECON                                                                                                                                                                                                   | <a href="http://eddylab.org/software/recon/">http://eddylab.org/software/recon/</a>                                                             |
|                 | PILER                                                                                                                                                                                                   | <a href="http://www.drive5.com/piler">http://www.drive5.com/piler</a>                                                                           |
|                 | BLASTER suite                                                                                                                                                                                           | <a href="https://urgi.versailles.inra.fr/Tools/Blaster">https://urgi.versailles.inra.fr/Tools/Blaster</a>                                       |
|                 | REPuter                                                                                                                                                                                                 | <a href="http://bibserver2.cebitec.uni-bielefeld.de/reputer">http://bibserver2.cebitec.uni-bielefeld.de/reputer</a>                             |
|                 | RepSeek                                                                                                                                                                                                 | <a href="http://www.abi.snv.jussieu.fr/public/RepSeek">http://www.abi.snv.jussieu.fr/public/RepSeek</a>                                         |
|                 | Repeat-match                                                                                                                                                                                            | <a href="http://mummer.sourceforge.net">http://mummer.sourceforge.net</a>                                                                       |
|                 | LTRdigest                                                                                                                                                                                               | <a href="https://omictools.com/ltrdigest-tool">https://omictools.com/ltrdigest-tool</a>                                                         |
|                 | LTR_retriever                                                                                                                                                                                           | <a href="https://github.com/oushujun/LTR_retriever">https://github.com/oushujun/LTR_retriever</a>                                               |
|                 | REPET                                                                                                                                                                                                   | <a href="https://urgi.versailles.inra.fr/Tools/REPET">https://urgi.versailles.inra.fr/Tools/REPET</a>                                           |
|                 | RepeatScout                                                                                                                                                                                             | <a href="https://omictools.com/repeatscout-tool">https://omictools.com/repeatscout-tool</a>                                                     |
|                 | RepeatModeler2                                                                                                                                                                                          | <a href="http://www.repeatmasker.org/RepeatModeler/">http://www.repeatmasker.org/RepeatModeler/</a>                                             |
|                 | Generic Repeat Finder                                                                                                                                                                                   | <a href="https://github.com/bioinfolabmu/GenericRepeatFinder">https://github.com/bioinfolabmu/GenericRepeatFinder</a>                           |
|                 | EDTA                                                                                                                                                                                                    | <a href="https://github.com/oushujun/EDTA">https://github.com/oushujun/EDTA</a>                                                                 |
| RepARK          | <a href="https://github.com/PhKoch/RepARK">https://github.com/PhKoch/RepARK</a>                                                                                                                         |                                                                                                                                                 |
| REPdenovo       | <a href="https://github.com/simoncchu/REPdenovo">https://github.com/simoncchu/REPdenovo</a>                                                                                                             |                                                                                                                                                 |
| RepLong         | <a href="https://github.com/ruiguo-bio/replong">https://github.com/ruiguo-bio/replong</a>                                                                                                               |                                                                                                                                                 |

including tandem arrays, scattered families, terminal repeats, and pseudo-satellites. LTRdigest uses the local alignment and hidden Markov model(HMM) to identify families based on sequence characteristics and annotates the internal structure of long terminal repetitive retrotransposons (It can be used to identify protein coding regions associated with the retrotransposition process as well as internal regulatory features using local alignment and hidden markov model-based algorithm).

The methods in the second category rely on *k-mer* and space seed extension strategies to identify repetitive sequences. These methods convert the sequences in the genome into *k-mers* of a certain length, and then select the *k-mers* whose frequency exceeds a certain threshold as a seed, search for the locations of these seeds in the genome, and perform the sequence extension to both ends of the genome and get the expanded sequences. During the extension process, it always judges whether the extended sequences are consistent at multiple locations in the genome. If yes, it continues the extension, otherwise stops the extension. EDTA[44], RepeatFinder[45], RepeatScout[46], ReAS[47], Generic Repeat Finder (GRF)[48] and RepeatModeler2[49] are typical of such kind of tool, they start with a library of high-frequency *k-mers* that are used in initial identification, alignment and extension of sequence substrings. For example, ReAS is designed to use multiple sequence reads as a substrate, RepeatScout is developed for identification of repeats in assembled genomic regions, builds a library of high-frequency *k-mers* and retrieves substrings of the input sequence containing a specific *k-mer* in a manner similar to that of ReAS. Generic Repeat Finder (GRF) is a tool for genome-wide repeat detection based on fast, exhaustive numerical calculation algorithms integrated with optimized dynamic programming strategies, which is the latest representative of the second category of tools. GRF uses a new scoring system to calculate cumulative scores for subsequences of certain length for all chromosomes, and groups sequences with the same scores together using a hash table, and finds candidate repeats (seed regions) with each group by comparing nucleotide sequences, and extends the seed regions by allowing mismatches in both upstream and downstream flanking regions. RepeatModeler2 is a pipeline for automated *de novo* identification of TEs that employs four distinct discovery algorithms (RepeatScout, RECON, LTRharvest[50] and LTR\_retriever[51]), which takes advantages of the unique strengths of each tools as well as providing a tractable solution to analyzing large datasets such as whole-genome assemblies. Extensive *de-novo* TE Annotator (EDTA) combines the best-performing programs (LTR\_FINDER[52], LTR\_retriever, GRF, TIR-Learner[53], HelitronScanner[54] and RepeatModeler) and subsequent filtering methods for *de novo* identification of each TE subclass and compiles the results into a comprehensive non-redundant TE library. Since the tools called in RepeatModeler2 and EDTA are more or less related to the seed-extension strategy, so we classify them as the second category of tool.

The methods in the third category rely on sequence assembly and similarity network to identify repeats, which mainly includes RepARK [55], REPdenovo[56] and RepLong[57]. Among them, the first two methods obtain the repetitive sequences by assembly of the high frequency *k-mers*, and the last method is currently the only detection method that is suitable for the third generation sequencing reads. RepARK is a *de novo* repeat assembly method which avoids potential biases by using abundant *k-mers* of NGS WGS reads without requiring a reference genome. RepARK is orders of magnitude faster than the other methods and generates libraries that are composed almost entirely of repetitive motifs, more comprehensive and almost completely annotated by TEclass[58]. REPdenovo is designed based on the idea of frequency *k-mer* assembly for constructing repeats directly from sequencing reads, which provides many functionalities, and can generate much longer repeats than existing tools. RepLong is a novel *de novo* repeat elements identification method based on PacBio long reads. RepLong can handle lower coverage data and serve as a complementary solution to the existing methods to promote the repeat identification performance on long read sequencing data. The detailed classification of existing detection methods is shown in Table S2.

In the process of NGS sequence assembly, the paired-end reads with large insert size are mainly used to resolve the ambiguity paths generated by the repeated regions in assembly graph and determine the successive positions of contigs in the process of scaffolding[59]. The assembly-based detection methods are based on the high-frequency *k-mers* assembly to obtain repetitive sequences. Due to the lack of support for long sequence fragments that can span the repetitive regions, the assembler will inevitably make misassemblies when processing these short and highly repetitive sequences[60]. On the other hand, they depend too much on the threshold of the high frequency *k-mer*, which is difficult to obtain accurately due to the sequencing bias. The long reads are more likely to cover repetitive regions completely, which is more favorable for recognizing long repeats[61]. However, the high error rate of long reads has a great impact on the accuracy of this method. In addition, the method constructs the similarity network by comparing the long reads, and then uses the community discovery algorithm to get the detection results, which has higher computational complexity when processing large datasets. In summary, it is often difficult for existing *de novo* detection methods to achieve satisfactory results in terms of both accuracy and size.

### 1.3 Detailed introduction of the working modes of LongRepMarker

#### 1.3.1 reference-assisted mode

The labeling of repetitive regions in large genomes (such as mammalian and plant genomes) plays an important role in understanding the evolution, inheritance, gene expression and other life processes of complex organisms. In addition, labeling the repetitive regions in large genomes is also helpful to improve the quality of sequence assembly of corresponding species. However, due to the large amount of sequencing data, it is very difficult for *de novo* methods to deal with these massive sequencing data, and the detection results are often poor. In order to solve this problem, LongRepMarker provides a reference-assisted mode. The repetitive sequences are a special kind of overlap sequences, and the overlap sequences occupy only a small part of the overall sequences. By finding the overlap sequences between assemblies or chromosomes, the algorithm locates the repetitive regions faster and more accurately. If there is a reference sequence or a rough assembly of a species or a reference sequence of similar species, LongRepMarker can quickly and accurately derive a repeat library for that species. The input of this mode is the reference sequences or the rough assembly of a species or the reference sequences of a similar species, and the output is the detection results which include the repeat library and several detailed reports.

#### 1.3.2 *de novo* mode based on only NGS short reads

In the process of NGS sequence assembly, the paired-end reads with large insert size are mainly used to resolve the ambiguity paths generated by the repeated regions in the assembly graph and determine the successive positions of contigs in the process of scaffolding. The assembly-based detection methods are based on the high-frequency *k-mer* assembly to obtain repetitive sequences. Due to the lack of support for long sequence fragments that can span the repetitive regions, the assembler will inevitably make misassemblies when processing these short and highly repetitive sequences. On the other hand, they depend too much on the threshold of the high frequency *k-mers*, which is difficult to obtain accurately due to the sequencing bias. In this mode, the proposed algorithm produces assemblies by assembling all paired-end reads instead of assembling the high frequency *k-mers*, the algorithm can identify the repeats in the genomes to a greater extent. Due to sequencing bias, the high frequency threshold is often difficult to obtain accurately, which has a great impact on the range of the high frequency *k-mers*. By using the multi-alignment unique *k-mers* to identify repeats in overlap sequences, the algorithm can obtain the repeats in the genomes more comprehensively and stably.

#### 1.3.3 *de novo* mode based on NGS short reads + barcode linked reads / SMS long reads

Repetitive elements have played, and are continuing to play, critical roles in genome evolution. Prokaryotic genomes contain a variety of large size and low copy number repeated sequences, these sequences may contribute to the evolution of chromosome structure through DNA rearrangements such as chromosome deletions, duplications and inversions. However, most existing *de novo* identifications (such as RepARK, Repdenovo, RepLong, etc.) cannot achieve satisfactory results for marking repetitive regions in both accuracy and size as the NGS reads are too short to identify long repeats and SMS long reads are with the high error rate. In this mode, the proposed algorithm produces assemblies based on Illumina short paired-end reads and barcode linked reads or SMS long reads, and calls a NGS-based assembler called SPAdes[62] which adopts some better repeat processing strategies and has superior performance than other similar tools (such as SOAPdenovo2[63], Abyss[64], Velvet[65] and IDBA-UD[66]). The reasons for choosing SPAdes as the assembler and the performance comparison analysis of SPAdes and other similar tools are shown in **section 1.5 of the supplementary**, and the advantages of using SPAdes to assemble Illumina short paired-end reads and barcode linked reads or corrected SMS long reads in repetitive sequences identification are described in **section 1.4 of the supplementary**.

#### 1.3.4 *de novo* mode based on only SMS long reads

As the development of the third generation SMS sequencing, the SMS long reads have been widely applied in various fields of bioinformatics. In order to better comply with market demand and further expand the application scope of this system, we have developed a detection mode only based on the SMS long reads under the LongRepMarker framework. The input of this mode is only SMS long reads (Pacbio, CCS and HiFi reads) and the output is the detection results which include the repeat library and several detailed reports. The workflow of this mode can be divided into the following steps: 1) getting the overlap sequences between long reads. 2) estimating the average coverage of the overlap sequences. 3) filtering the overlap sequences with low coverage. 4) getting the filtered overlap sequences with the high copy number in long reads (for example, the copy number is more than  $1.5 \times \text{AverageCoverage}$ ). 5) identifying the genetic variations existing in the detected repetitive regions and 6) generating the final detection results. It can be seen from the related test results displayed in the experimental section (**Section S3.3.6**) that compared with the existing long reads-based detection methods, this mode has the advantages of low memory consumption, high speed and high detection accuracy. The working principle of this mode is shown in FigS2.

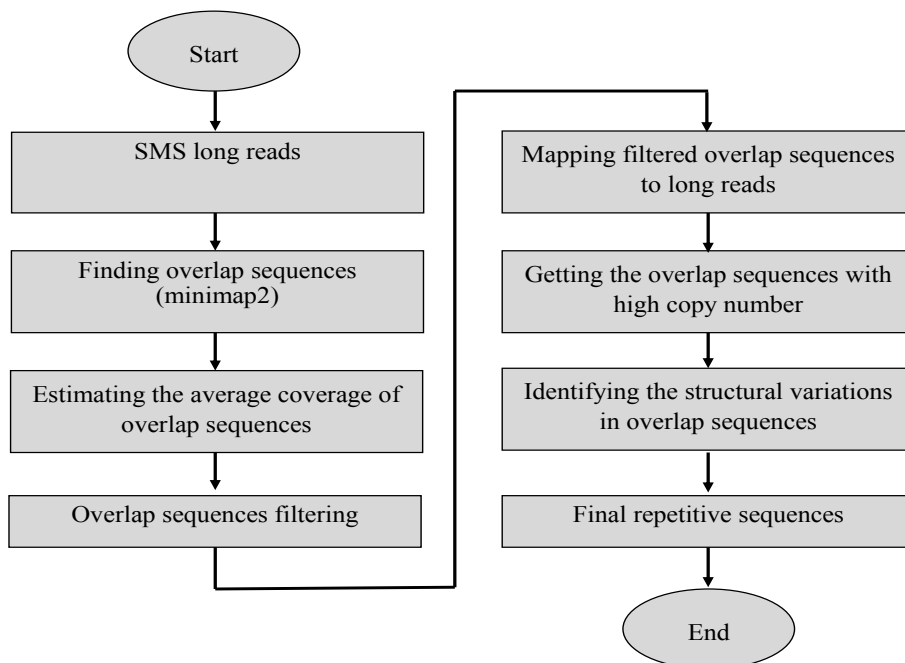

**Fig. S2.** The working principle of the detection mode based on only the SMS long reads.

## 1.4 Other issues that users care about

### 1.4.1 The main differences between the reference-assisted mode and the *de novo* mode

The main differences between the reference-assisted mode and the *de novo* mode are as follows:

1) The reference-assisted mode does not need sequence assembly in the pipeline. Due to this reason, the reference-assisted mode is much faster than the *de novo* mode, and it can be used to handle some large genomes, such as mammalian and plant genomes. On the contrary, since the *de novo* mode needs to rely on the results of sequence assembly for detection, and sequence assembly often requires a lot of time and huge computing resources when processing the large datasets. Therefore, the *de novo* mode is often slow and consumes a lot of memory when processing the large datasets;

2) Since the main processing object of the reference-assisted mode is the reference genome. The reference genome is the consensus genome of the species, which has high accuracy and low specificity. The processing object of the *de novo* mode is the sequencing reads which has high specificity and relatively low accuracy. The characteristics of these two types of data are quite different, among which the error rate and abundance of the sequencing reads is significantly higher than the reference sequences, so the *de novo* mode sets a large error tolerance rate. The reference-assisted mode is often used to quickly and accurately obtain the repetitive regions in the reference genome of large species, and the error rate it can accommodate is very small. Furthermore, the pipeline of reference-assisted mode is quite different from that of *de novo* mode. For example, in *de novo* mode, after the preliminary repetitive sequences are obtained based on the assembly of overall reads (NGS short paired-end reads + barcode linked reads / SMS long reads), the paired-end reads with high *k-mer* coverage are selected to enter the scaffolding process[67] together with the preliminary repetitive sequences, which can make the final detection results have better integrity and higher coverage;

3) The reference-assisted mode does not consider the genetic variations that occurred in the repetitive regions, because the structural variations usually occur in sequencing reads, while they are usually not considered in the reference genome. Based on this common sense, we can think that the reference-assisted mode is mainly used to detect the common repetitive sequences of species, while the *de novo* mode can be used to well identify the repetitive sequences existing in individual genomes of species, which may not appear in the reference genome.

### 1.4.2 The advantages of barcode linked reads and long reads in assisting the assembly of Illumina short paired-end reads

Linked-reads provide the long range information missing from standard approaches[68], which builds on the Illumina sequencing technology to provide indexing and barcoding information along with short reads to localize the latter on long DNA fragments (linked-reads), thus benefiting the economies of a high throughput platform. As sequencing reads from 20 to 200kb are barcoded/linked, applications of the technology mainly focused on phasing variant bases in human genomes[69]. Because the length of linked-reads can reach to 20 to 200kb, they can easily span most of repetitive regions in genome. In addition, because the sequencing accuracy of linked-reads is the same as that of Illumina sequencing (the error rate is about 0.2% to 0.5%), they have large size and high sequencing accuracy. These two characteristics of linked-reads make them very suitable for the repetitive sequence identification.

Although barcode linked reads have a long span and high sequencing accuracy, there are not many species libraries measured by this technology, which severely limits the usability of the proposed tool. In order to solve this problem, we have introduced the rapidly developing and widely used third generation sequencing reads into this framework. The third generation sequencing technologies produce long reads with an average length of 10 kbp to several hundreds kbp. For example, there are two widely used third-generation single molecule sequencing platforms: Pacific Biosciences (PacBio) and Oxford Nanopore Technologies (Nanopore). The average length of PacBio long reads is more than 10kbp, while the average length of the Nanopore long reads can reach several hundreds kbp, and statistics show that the longest read length is more than 1 million bp[70]. Longer lengths are attractive because they enable disambiguation of repetitive regions in a genome or a set of genomes. These long reads however the extremely noisy, and display error rates of 10% to 20% (the average error rate of PacBio long reads is between 10% to 15%, while the average error rate of Nanopore long reads is between 15% and 20%). Moreover, long reads's errors are mainly

composed of insertions and deletions[71]. Error correction algorithms (such as HECIL[72], LoRDEC[73] and HALC[74]) have been designed to identify and fix sequencing errors, thereby benefiting re-sequencing or *de novo* sequencing analysis. Although the third-generation sequencing has the defect of high error rate, it is currently the mainstream of the development of sequencing technologies, and the available sequencing data is abundant. In addition, with the development of sequencing and error correction technologies, the error rate of the current third-generation sequencing has a significant downward trend. Introducing the corrected SMS long reads into this framework can greatly expand the application range of it. The principle of barcode linked reads and SMS long reads in assisting short reads to resolve the ambiguous paths caused by repetitive regions in the assembly graph is shown in Fig. S3.

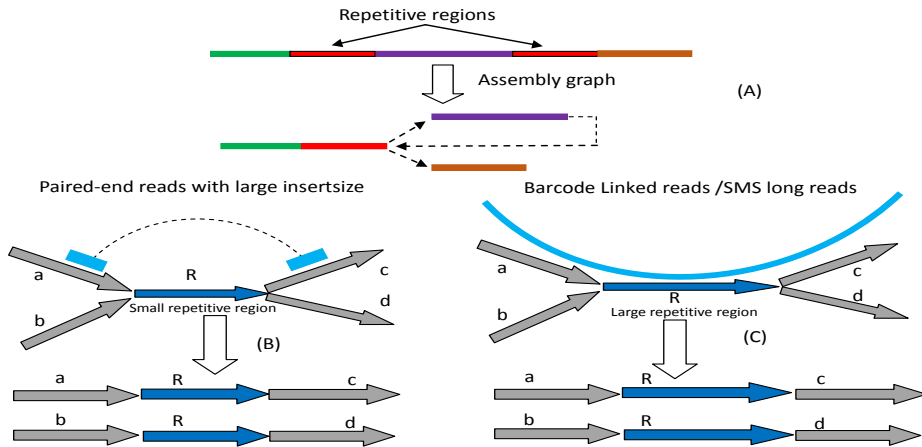

**Fig. S3.** The principle of barcode linked reads and SMS long reads in assisting short reads to resolve the ambiguous paths caused by repetitive regions in the assembly graph.

### 1.4.3 The main reasons for choosing SPAdes as assembler

SPAdes is one of the Eulerian *de Bruijn* graph based assemblers, it was originally designed for prokaryotic genomes (Such as microbial and single-cell sequencing) but was later developed to accommodate large eukaryotic genomes. This program uses the paired-end *de Bruijn* graphs, which is a kind of double-layered *de Bruijn* graphs. The *k-mers* from DNA fragment reads build the inner *de Bruijn* graph, which is used for the contig assembly. On the other hand, the paired *k-mers* with the large insert size build the outer *de Bruijn* graph, which is used for repeat resolving or scaffolding(Fig. S4). ExSPAnDer[75] is a universal repeat resolver for short DNA fragment assembly, which uses a simple path extension approach for repeat resolution. ExSPAnDer is a separate solution proposed by the SPAdes research group to solve the problem of repetitive regions in the short sequence assembly(Fig. S4), it has been incorporated into the new version of SPAdes (After version 3.0). In order to verify the effectiveness of SPAdes, we tested the performance of it on *B.faecium* dataset, the detailed information of this dataset is shown in Table S3. The records without an asterisk after the tool name in Tables S4 and S5 are the assemblies generated by the tools under the condition of single paired-end reads (only one group of paired-end reads). The records with an asterisk after the tools name are the assemblies generated by the tools under the condition of multiple sets of paired-end reads(both paired-end reads and jumping reads). The different sets of paired-end reads of *B.faecium* can be downloaded from GAGE-B ([http://ccb.jhu.edu/gage\\_b/](http://ccb.jhu.edu/gage_b/)) and GAGE (<http://gage.cbcb.umd.edu/>) websites, respectively. The results shown in Tables S4 and S5 have fully proved that the repeat solution strategies adopted in ExSPAnDer are of great significance to improve the integrity of the assembly. In addition, the new version of SPAdes (After version 3.0) not only incorporates ExSPAnDer, but also makes many new optimizations and improvements, so that the new version of SPAdes has more superior performance in solving the repetitive regions.

The advantages of SPAdes are as follows: 1) SPAdes is an iterative short read genome assembly tool, which produces longer and more accurate contigs than other similar tools, for detailed proof please review the following literatures [76], [77], [78], [79] and [80]; 2) SPAdes works with many data types such as Illumina paired-end reads (Illumina paired-end / high-quality mate-pairs / unpaired reads), IonTorrent paired-end and PacBio CCS reads, and can also make full use of the support information provided by Oxford Nanopore long reads, PacBio long reads, and Sanger sequencing reads for high-quality hybrid assembly (Note: Oxford Nanopore long reads, PacBio long reads, and Sanger sequencing reads can only be used in hybrid assemblies with higher quality short read data ).

**Table S3.** Details of the *B.faecium* isolate dataset.

| Library          | Number of reads | Average coverage | Coverage span | Insert size | Insert span | Chimeric read-pairs(%) | Unaligned read-pairs(%) |
|------------------|-----------------|------------------|---------------|-------------|-------------|------------------------|-------------------------|
| Paired-end reads | 13M             | 400 ×            | 210-570       | 270bp       | 150-400bp   | 1                      | 16                      |

'Insert span' indicates the shortest insert size interval that contains at least 95% of properly aligned read-pairs.

'Unaligned read - pairs' indicates the percentage of read-pairs that have at least one read unaligned. 'Chimeric read - pairs' indicates the percentage of chimeric read-pairs among all read-pairs. All statistics was obtained using bowtie2. 'Coverage span' is the smallest coverage interval that includes a least 95% of all genomic positions.

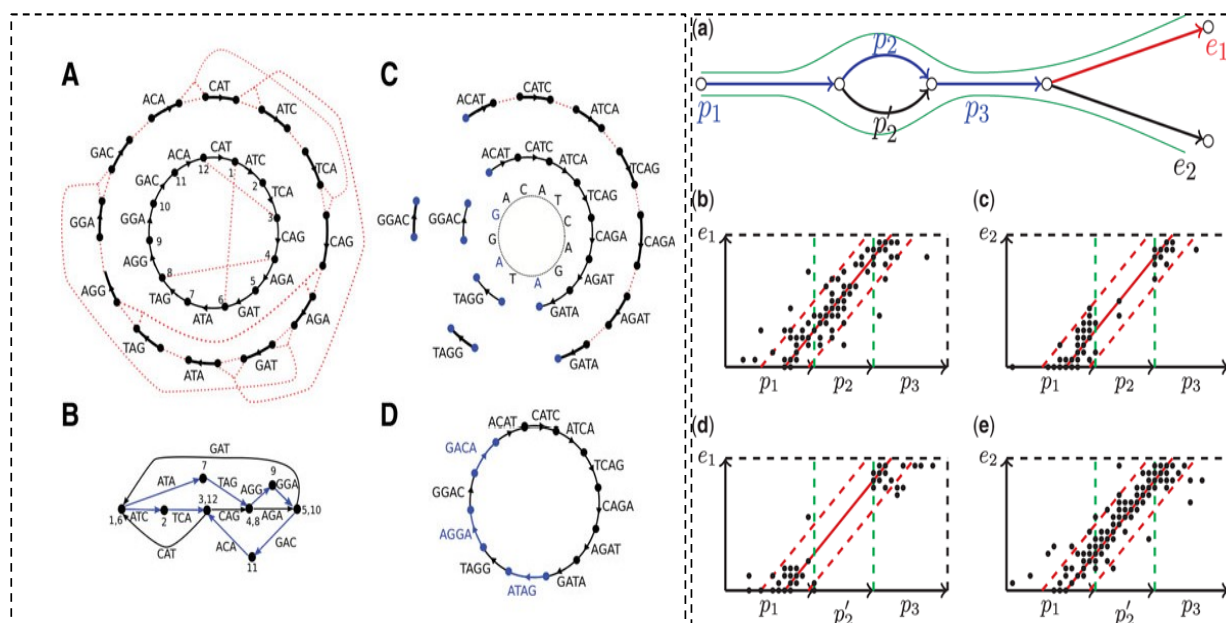

**Fig. S4.** The left sub-graph shows the standard and multiplied *de Bruijn* graph. SPAdes take advantage of multiple *de Bruijn* graphs to solve the problems caused by sequencing bias and repetitive regions. This program uses the paired-end de Bruijn graphs which is a kind of double-layered *de Bruijn* graphs to construct the contigs. The  $k$ -mers from DNA fragment reads build the inner *de Bruijn* graph, which is used for the contig assembly. On the other hand, the paired  $k$ -mers with the large insert size build the outer *de Bruijn* graph, which is used for repeat resolving or scaffolding. This program provide a better solution which, instead of using a single  $k$  ( $k$ -mer size), iterates from  $k=k_{min}$  to  $k=k_{max}$ . At each iteration, the constructed contigs are used as reads for the next iteration. These contigs carry the  $k$ -mers of the current iteration, which may be missing in the next iteration, to the next iteration, thus solving some of the gap problems. In addition, the large  $k$  is used to resolve the branches caused by repetitive regions. The right sub-graph shows the principle of ExSPAnDer resolving repeats using either a single or multiple paired-end reads with different insert sizes. ExSPAnDer uses a simple path extension approach for repeat resolution that was originally proposed in the Ray assembler [and later used in Telescope] and combines it with some ideas from the Rectangle Graph approach. Given a set of paths in the assembly graph (i.e. simplified *de Bruijn* graph of  $k$ -mers in reads after removal of bulges, tips and chimeric edges), ExSPAnDer attempts to extend each path with the goal to generate longer paths. ExSPAnDer uses a decision rule Extend(P) that either chooses one of the extension edges to extend the path P or makes the decision to stop growing this path beyond the ending vertex of P. The procedure is iterated over all the paths until no path can be further extended. To initiate this algorithm one can start with a set of single-edge paths formed by all sufficiently long edges in the assembly graph. The resulting paths are output as contigs after removing the paths that are contained within other paths as well as removing non-informative overlaps (i.e. suffixes of paths that represent prefixes of other paths).

**Table S4.** Comparison of contigs for the *B.faecium* isolate dataset.

| Assembler    | NG50        | Num       | Max(bp)     | MA       | GF(%)       |
|--------------|-------------|-----------|-------------|----------|-------------|
| ABySS        | 203         | 40        | <b>672</b>  | <b>0</b> | <b>99.9</b> |
| Ray          | 114         | 51        | 436         | 1        | 98.9        |
| SOAP2        | 20          | 333       | 61          | <b>0</b> | 98.9        |
| Velvet       | 144         | 47        | 550         | <b>0</b> | 99.4        |
| Velvet-SC    | 163         | 46        | 550         | 0        | 99.4        |
| IDBA-UD      | 202         | 39        | 483         | <b>0</b> | 99.4        |
| SPAdes2.4    | 361         | 24        | 635         | 1        | 99.7        |
| ExSPAnDer    | <b>380</b>  | <b>22</b> | <b>672</b>  | 1        | 99.5        |
| ABySS *      | 203         | 40        | 672         | <b>0</b> | <b>99.9</b> |
| ALLPATHS-LG* | 313         | 21        | 686         | <b>0</b> | 99.5        |
| Ray *        | 87          | 88        | 416         | 2        | 96.8        |
| SOAP2 *      | 87          | 50        | 500         | 23       | 98.8        |
| Velvet *     | 103         | 75        | 242         | 11       | 99.0        |
| Velvet-SC *  | 253         | 40        | 545         | 15       | 99.8        |
| IDBA-UD *    | 207         | 41        | 483         | <b>0</b> | 99.4        |
| ExSPAnDer *  | <b>3268</b> | <b>2</b>  | <b>3268</b> | 1        | <b>99.9</b> |

'Num' indicates the number of contigs. 'Max(bp)' indicates the length of the largest contig. 'MA' indicates the number of misassembly. 'GF(%)' indicates the genome fraction(%). The records with an asterisk after the tool name is the assemblies generated by the tool under the condition of multiple groups of paired-end reads.

**Table S5.** Comparison of scaffolds for the *B.faecium* isolate dataset.

| Assembler    | NG50        | Num       | Max(bp)     | MA       | GF(%)       |
|--------------|-------------|-----------|-------------|----------|-------------|
| ABySS        | 383         | 24        | 676         | <b>0</b> | <b>99.9</b> |
| Ray          | 204         | 31        | 553         | 1        | 98.9        |
| SOAP2        | <b>477</b>  | 26        | <b>724</b>  | <b>0</b> | 99.3        |
| Velvet       | <b>477</b>  | 28        | <b>724</b>  | <b>0</b> | 99.4        |
| Velvet-SC    | <b>477</b>  | 28        | 671         | <b>0</b> | 99.4        |
| IDBA-UD      | 250         | 30        | 671         | <b>0</b> | 99.4        |
| SPAdes2.4    | 361         | <b>22</b> | 671         | 1        | 99.7        |
| ExSPAnDer    | 380         | <b>22</b> | 672         | 1        | 99.5        |
| ABySS *      | 250         | 30        | 739         | 1        | <b>99.9</b> |
| ALLPATHS-LG* | 3610        | 7         | <b>3610</b> | 1        | 99.5        |
| Ray *        | 106         | 75        | 416         | 2        | 96.8        |
| SOAP2 *      | 480         | 28        | 810         | 2        | 96.4        |
| Velvet *     | 2651        | 14        | 2651        | 78       | 99.1        |
| Velvet-SC *  | 945         | 102       | 1381        | 500      | 98.9        |
| IDBA-UD *    | 1002        | 9         | 1692        | <b>0</b> | 99.4        |
| ExSPAnDer *  | <b>3268</b> | <b>2</b>  | 3268        | 1        | <b>99.9</b> |

'Num' indicates the number of contigs. 'Max(bp)' indicates the length of the largest contig. 'MA' indicates the number of misassembly. 'GF(%)' indicates the genome fraction(%). The records with an asterisk after the tool name is the assemblies generated by the tool under the condition of multiple groups of paired-end reads.

#### 1.4.4 The community discovery algorithm of RepLong

In the paper corresponding to the tool RepLong[57], the authors proposed that the overlaps between the repeat reads are more intensive than that of the other reads, which in the constructed network is characterized with some topology structures of denser intra-connectivity and meanwhile sparse inter-connectivity. Such topology structures are also known as community in graph theory. Thus repeat identification can be transformed into a community identification problem when the network is constructed. For example, in Fig. S5, two piles of reads after sequence alignment correspond to two repeats. In each pile, the coverage inside is much higher than outside, so there are corresponding community structures in the network of read overlaps thanks to the dense intra-connections in the read piles.

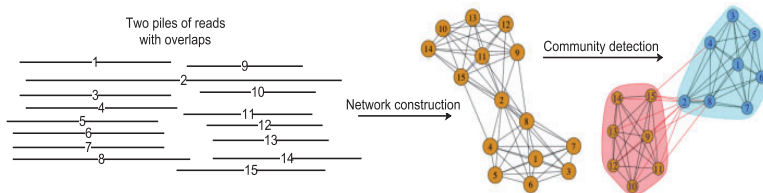

**Fig. S5.** Two piles of reads after sequence alignment correspond to two repeats.

The authors define a vector  $C = [c_1, c_2, c_i, \dots, c_{|V|}]$  to indicate the community labels of all nodes. The  $i$ -th component  $c_i$  of  $C$  means that the  $i$ -th node belongs to  $c_i$ -th community. Communities can be detected based on modularity optimization[81] for community labels in  $C$ . Modularity reflects the concentration of edges within communities compared with random distribution of links between all nodes regardless of communities. Particularly, the modularity  $Q(C)$  with respect to a node label vector  $C$  is defined as follows[82]:

$$Q(C) = \frac{1}{2m} \sum_{i,j=1}^{|V|} (A_{ij} - \frac{k_i k_j}{2m}) \delta(c_i, c_j) \quad (1)$$

Where  $k_i$  and  $k_j$  are the degrees of the  $i$ -th and  $j$ -th nodes with their corresponding community labels  $c_i$  and  $c_j$  in the network, respectively, and  $A_{ij}$  is the element in the adjacency matrix of the network. The delta function is defined as  $\delta(c_i, c_j) = 1$ , if  $c_i = c_j$ , otherwise  $\delta(c_i, c_j) = 0$ .  $Q(C)$ , in the range of  $[-1/2, 1)$ , actually measures the strength of division of a network into communities. A larger  $Q(C)$  indicates a better grouping of communities. To find the best community structures, one can maximize  $Q(C)$  by the following constrained optimization problem:

$$\begin{cases} \max_C = [c_1, \dots, c_{|V|}] Q(C) \\ \text{subject to : } 1 \leq c_i \leq |V|, i = 1, \dots, |V| \end{cases} \quad (2)$$

The Louvain method[82], which has shown promising performance in terms of accuracy and computing time[83], is utilized to solve the modularity optimization model in (Equation (2)) for community identification. The Louvain method initially assigns each network node as a single community. Afterward, the following two steps are iteratively proceeded until a maximum modularity is reached: (i) each node is removed from its own community and placed in the community of its neighbor node such that the modularity gain is maximized, and (ii) nodes in the same community are aggregated to form a super-node and a new smaller scale network is generated.

#### 1.4.5 How to get the barcode Linked reads

Linked-reads provide the long range information missing from standard approaches[84], which builds on the Illumina sequencing technology to provide indexing and barcoding information along with short reads to localize the latter on long DNA fragments (linked-reads), thus benefiting the economies of a high throughput platform. As sequencing reads from 20 to 200kb are barcoded/linked, applications of the technology mainly focused on phasing variant bases in human genomes[85]. Because the length of linked-reads can reach to 20 to 200kb, they can easily span most of repetitive regions in genome. In addition, because the sequencing accuracy of linked-reads is the same as that of Illumina sequencing (the error rate is about 0.2% to 0.5%), they have large size and high sequencing accuracy. These two characteristics of linked-reads make them very suitable for the repetitive sequence identification.

There are some research institutions have published barcode linked genomics datasets. For example, we can download some real barcode linked genomics reads of human (HG003\_NA24149\_father, HG004\_NA24143\_mother and HG002\_NA24385\_son) from website <ftp://ftp-trace.ncbi.nlm.nih.gov/giab/ftp/data/>. In order to verify the detection effect of LongRepMarker on real barcode linked datasets, we also tested the performance of it on HG003\_NA24149\_father, HG004\_NA24143\_mother and HG002\_NA24385\_son these datasets. The specific detection results are shown in section S1.7 of the supplementary materials.

Although there are some public barcode linked datasets that can be used for free. However, from an overall point of view, the available barcode linked data is still very scarce. In order to fully verify the performance of LongRepMarker on the barcode linked datasets, we can also use the following method to simulate the required barcode linked reads. In the following section, we take the drosophila genome as an example to explain the process of simulating barcode linked reads in detail.

#### 1) Simulation tool selection

LRSIM[86] is a linked-reads simulator, which is published on the computational and structural biotechnology journal. The tool is public available at <https://github.com/aquaskyline/LRSIM>. Details of the command and parameters for calling LRSIM is shown in Table S6.



**Table S6.** Details of the command and parameters for calling LRSIM.

| Usage: ./simulateLinkedReads.pl -r/-g <reference/haplotypes> -p <output prefix> [options] |        |                                                         |
|-------------------------------------------------------------------------------------------|--------|---------------------------------------------------------|
| Reference genome and variants:                                                            |        |                                                         |
| -d                                                                                        | INT    | Haplotypes to simulate [2]                              |
| -g                                                                                        | STRING | Haploid FASTAs separated by comma. Overrides -r and -d. |
| -1                                                                                        | INT    | 1 SNP per INT base pairs [1000]                         |
| -2                                                                                        | INT    | Minimum length of Indels [1]                            |
| -3                                                                                        | INT    | Maximum length of Indels [50]                           |
| -4                                                                                        | INT    | # of Indels [1000]                                      |
| -5                                                                                        | INT    | Minimum length of Duplications and Inversions [1000]    |
| -6                                                                                        | INT    | Maximum length of Duplications and Inversions [10000]   |
| -7                                                                                        | INT    | # of Duplications and # of Inversions [100]             |
| -8                                                                                        | INT    | Minimum length of Translocations [1000]                 |
| -9                                                                                        | INT    | Maximum length of Translocations [10000]                |
| -0                                                                                        | INT    | # of Translocations [100]                               |
| Illumina reads characteristics:                                                           |        |                                                         |
| -e                                                                                        | FLOAT  | Per base error rate of the first read [0.0001, 0.0016]  |
| -E                                                                                        | FLOAT  | Per base error rate of the second read [0.0001, 0.0016] |
| -i                                                                                        | INT    | Outer distance between the two ends for pairs [350]     |
| -s                                                                                        | INT    | Standard deviation of the distance for pairs [35]       |
| Linked reads parameters:                                                                  |        |                                                         |
| -b                                                                                        | STRING | Barcodes list                                           |
| -x                                                                                        | INT    | # million reads pairs in total to simulated [600]       |
| -f                                                                                        | INT    | Mean molecule length in kbp [100]                       |
| -c                                                                                        | STRING | Input a list of fragment sizes. Overrides -f.           |
| -t                                                                                        | INT    | n*1000 partitions to generate [1500]                    |
| -m                                                                                        | INT    | Average # of molecules per partition [10]               |
| Miscellaneous:                                                                            |        |                                                         |
| -u                                                                                        | INT    | Continue from a step [auto]                             |
|                                                                                           | 1      | Variant simulation                                      |
|                                                                                           | 2      | Build fasta index                                       |
|                                                                                           | 3      | DWGSIM                                                  |
|                                                                                           | 4      | Simulate reads                                          |
|                                                                                           | 5      | Sort reads extraction manifest                          |
|                                                                                           | 6      | Extract reads                                           |
| -z                                                                                        | INT    | # of threads to run DWGSIM [8]                          |
| -o                                                                                        |        | Disable parameter checking                              |
| -h                                                                                        |        | Show this help                                          |

## 2) Taking drosophila genome as an example to illustrate the method of simulating barcode linked reads

Installing LRSIM:

```
git clone --recursive https://github.com/aquaskyline/LRSIM.git
cd LRSIM
sh make.sh
cd test
sh test.sh
```

It is worth noting that the libraries that LRSIM relies on can be found in the lib folder under its installation directory (e.g., Parse, Math, Inline and auto). Users only need to copy them to the corresponding directory in the linux system before installation (For example, copy them to /usr/local/lib/ x86\_64-linux-gnu/perl/5.22.1) to successfully install the tool. A screenshot of the working directory after LRSIM is successfully installed is shown in Figure S6.

Specific command and parameters:

```
./simulateLinkedReads.pl
-r /home/liaoxingyu/Repeats/reference/dmel-all-chromosome-r5.43.fasta
-p /homeb/liaoxingyu/10X_linked_reads/dmel/10x_dmel
-c /homeb/liaoxingyu/10X_linked_reads/dmel/fragmentSizesList -x 1 -f 50 -t 1 -m 10 -o -4 1 -7 1
```

As can be seen from the above command, the directory for storing simulation data is set to '/homeb/liaoxingyu/10X\_linked\_reads/dmel'. When we run the above command, the simulation data generated by LRSIM will be stored in this directory, just as shown in Figure S7. It is worth noting that the simulation reads generated by LRSIM are still in a paired-end format (e.g., 10x\_dmel\_S1\_L001\_R1\_001.fastq and 10x\_dmel\_S1\_L001\_R2\_001.fastq are paired-end reads). Reads in this format can be directly input as data to assembler (such as SPAdes) to participate in the construction of assemblies.

### 1.4.6 Presentation of detailed reports contained in the detection results of LongRepMarker

There are some detailed detection reports of repetitive sequences generated by LongRepMarker, just as the shown in Figures S8, S9, S10 and S11 (All screenshots shown are based on the drosophila genome). First of all, LongRepMarker generates a repetitive sequence library with annotation information, as shown in Figure S8. In this file, the first line starting with the angle bracket records the fragment ID and the repeat

| 名字                             | 大小        | 已改变                       | 权限        | 拥有者    |
|--------------------------------|-----------|---------------------------|-----------|--------|
| ..                             |           | 2021/3/29 星期一 上午 9:01:32  | rw-r-xr-x | liaoxy |
| .._Inline                      |           | 2021/3/14 星期日 上午 10:23:48 | rw-rw-r-x | liaoxy |
| test                           |           | 2021/3/14 星期日 上午 10:14:01 | rw-rw-rwx | liaoxy |
| mssortSrc                      |           | 2021/3/14 星期日 上午 9:36:06  | rw-rw-rwx | liaoxy |
| DWGSIMSrc                      |           | 2021/3/14 星期日 上午 9:36:05  | rw-rw-rwx | liaoxy |
| SURVIVORSrc                    |           | 2021/3/14 星期日 上午 9:34:38  | rw-rw-rwx | liaoxy |
| lib                            |           | 2021/3/14 星期日 上午 9:34:38  | rw-rw-rwx | liaoxy |
| SURVIVOR                       | 9,058 KB  | 2021/3/14 星期日 上午 9:36:10  | rw-rw-r-x | liaoxy |
| mssort                         | 50 KB     | 2021/3/14 星期日 上午 9:36:06  | rw-rw-r-x | liaoxy |
| samtools                       | 1,962 KB  | 2021/3/14 星期日 上午 9:36:05  | rw-rw-r-x | liaoxy |
| dwgsim                         | 293 KB    | 2021/3/14 星期日 上午 9:36:05  | rw-rw-r-x | liaoxy |
| extractReads                   | 19 KB     | 2021/3/14 星期日 上午 9:36:02  | rw-rw-r-x | liaoxy |
| simulateLinkedReads.pl         | 37 KB     | 2019/8/1 星期四 下午 1:24:49   | rw-rw-rwx | liaoxy |
| README.md                      | 7 KB      | 2019/8/1 星期四 下午 1:24:49   | rw-rw-rwx | liaoxy |
| make.sh                        | 1 KB      | 2019/8/1 星期四 下午 1:24:49   | rw-rw-rwx | liaoxy |
| LICENSE                        | 2 KB      | 2019/8/1 星期四 下午 1:24:49   | rw-rw-rwx | liaoxy |
| faFilter.pl                    | 1 KB      | 2019/8/1 星期四 下午 1:24:49   | rw-rw-rwx | liaoxy |
| extractReads.cpp               | 6 KB      | 2019/8/1 星期四 下午 1:24:49   | rw-rw-rwx | liaoxy |
| clean.sh                       | 1 KB      | 2019/8/1 星期四 下午 1:24:49   | rw-rw-rwx | liaoxy |
| 4M-with-alts-february-2016.txt | 79,560 KB | 2019/8/1 星期四 下午 1:24:49   | rw-rw-rwx | liaoxy |

Fig. S6. A screenshot of the working directory after LRSIM is successfully installed.

| 名字                                | 大小           | 已改变                       | 权限        | 拥有者    |
|-----------------------------------|--------------|---------------------------|-----------|--------|
| ..                                |              | 2021/3/14 星期日 上午 10:22:26 | rw-rw-r-x | liaoxy |
| out.log                           | 20 KB        | 2021/3/14 星期日 上午 10:33:12 | rw-rw-r-- | liaoxy |
| 10x_dmel_S1_L002_R2_001.fastq.gz  | 70,063 KB    | 2021/3/14 星期日 上午 10:33:12 | rw-rw-r-- | liaoxy |
| 10x_dmel_S1_L002_R1_001.fastq.gz  | 66,719 KB    | 2021/3/14 星期日 上午 10:33:12 | rw-rw-r-- | liaoxy |
| 10x_dmel.status                   | 9 KB         | 2021/3/14 星期日 上午 10:33:12 | rw-rw-r-- | liaoxy |
| 10x_dmel_S1_L001_R2_001.fastq.gz  | 70,086 KB    | 2021/3/14 星期日 上午 10:33:07 | rw-rw-r-- | liaoxy |
| 10x_dmel_S1_L001_R1_001.fastq.gz  | 66,739 KB    | 2021/3/14 星期日 上午 10:33:07 | rw-rw-r-- | liaoxy |
| 10x_dmel.1.sort.manifest          | 21,386 KB    | 2021/3/14 星期日 上午 10:32:46 | rw-rw-r-- | liaoxy |
| 10x_dmel.0.sort.manifest          | 21,393 KB    | 2021/3/14 星期日 上午 10:32:43 | rw-rw-r-- | liaoxy |
| 10x_dmel.1.manifest               | 21,386 KB    | 2021/3/14 星期日 上午 10:32:39 | rw-rw-r-- | liaoxy |
| 10x_dmel.1.fp                     | 1,318,362 KB | 2021/3/14 星期日 上午 10:32:33 | rw-rw-r-- | liaoxy |
| 10x_dmel.0.manifest               | 21,393 KB    | 2021/3/14 星期日 上午 10:32:25 | rw-rw-r-- | liaoxy |
| 10x_dmel.0.fp                     | 1,318,344 KB | 2021/3/14 星期日 上午 10:32:18 | rw-rw-r-- | liaoxy |
| 10x_dmel.dwgsim.1.12.fastq        | 495,497 KB   | 2021/3/14 星期日 上午 10:32:12 | rw-rw-r-- | liaoxy |
| 10x_dmel.dwgsim.0.12.fastq        | 495,494 KB   | 2021/3/14 星期日 上午 10:32:05 | rw-rw-r-- | liaoxy |
| 10x_dmel.hap.1.clean.fasta.fai    | 1 KB         | 2021/3/14 星期日 上午 10:31:37 | rw-rw-r-- | liaoxy |
| 10x_dmel.hap.0.clean.fasta.fai    | 1 KB         | 2021/3/14 星期日 上午 10:31:35 | rw-rw-r-- | liaoxy |
| 10x_dmel.hap.1.clean.fasta        | 167,150 KB   | 2021/3/14 星期日 上午 10:31:34 | rw-rw-r-- | liaoxy |
| 10x_dmel.hap.0.clean.fasta        | 167,148 KB   | 2021/3/14 星期日 上午 10:31:30 | rw-rw-r-- | liaoxy |
| 10x_dmel.hap.B.fasta              | 166,444 KB   | 2021/3/14 星期日 上午 10:31:28 | rw-rw-r-- | liaoxy |
| 10x_dmel.hap.A.fasta              | 166,442 KB   | 2021/3/14 星期日 上午 10:31:28 | rw-rw-r-- | liaoxy |
| 10x_dmel.hap.homAB.insertions.fai | 0 KB         | 2021/3/14 星期日 上午 10:31:28 | rw-rw-r-- | liaoxy |
| 10x_dmel.hap.homAB.bed            | 1,548 KB     | 2021/3/14 星期日 上午 10:31:28 | rw-rw-r-- | liaoxy |
| 10x_dmel.hap.hetB.insertions.fai  | 1 KB         | 2021/3/14 星期日 上午 10:31:28 | rw-rw-r-- | liaoxy |
| 10x_dmel.hap.hetB.bed             | 1,550 KB     | 2021/3/14 星期日 上午 10:31:28 | rw-rw-r-- | liaoxy |
| 10x_dmel.hap.hetA.insertions.fai  | 1 KB         | 2021/3/14 星期日 上午 10:31:28 | rw-rw-r-- | liaoxy |
| 10x_dmel.hap.hetA.bed             | 1,561 KB     | 2021/3/14 星期日 上午 10:31:28 | rw-rw-r-- | liaoxy |
| 10x_dmel.hap.1.fasta              | 166,444 KB   | 2021/3/14 星期日 上午 10:31:28 | rw-rw-r-- | liaoxy |
| 10x_dmel.hap.0.fasta              | 166,442 KB   | 2021/3/14 星期日 上午 10:31:28 | rw-rw-r-- | liaoxy |
| 10x_dmel.hap.parameter            | 1 KB         | 2021/3/14 星期日 上午 10:29:46 | rw-rw-r-- | liaoxy |
| fragmentSizesList                 | 59 KB        | 2019/8/1 星期四 下午 1:24:49   | rw-rw-r-- | liaoxy |

Fig. S7. A screenshot of the working directory after LRSIM is successfully installed.

type of this fragment (e.g. the repeat type of the 4603-th fragment is satellite DNA). The second line is composed of A-T-G-C bases, which records the specific repetitive sequence.

Secondly, LongRepMarker generates a report that detailed records the distribution of repetitive sequences in the genome, as shown in Figure S9. The report includes the fragment ID, the starting position and ending position of the repetitive region on the fragment, the starting position and ending position of the repetitive region aligned to the reference sequence, the detailed alignment (cigar string), and the identity value of the alignment (The higher the identity, the better the quality of the alignment). The occurrence of the same fragment ID multiple times in the report indicates that there are multiple copies of the fragment in the genome, and the number of occurrences is the number of copies.

Thirdly, LongRepMarker generates a statistical report which detailed records the number of repeats, the proportion and detailed classification of the repetitive sequences in RepBase library or reference genome that can be covered by each type of repeats generated from LongRepMarker, as shown in Figure S10. This report is obtained by mapping the records in RepBase to the detection results generated by LongRepMarker through the RepeatMasker.

Finally, LongRepMarker generates a VCF format structural variation statistical report in the detection results, as shown in Figure S11. VCF (Variant Calling Format) is a tab-delimited text file that is used to describe single nucleotide variants (SNVs) as well as insertions, deletions, and other sequence variations. This is a bit limiting as it is only tailored to show variations and not genetic features. In addition, INDEL (insertion and deletion) mutations within repetitive sequences are usually easy to be found, but it is very difficult for LongRepMarker to find and determine the inversion and translocation mutations that occur within the repetitive sequences. In order to solve this problem, LongRepMarker calls two professional detection tools, ngmlr (<https://github.com/philtres/ngmlr>) and Sniffles (<https://github.com/fritzsedlazeck/Sniffles>)[87], to discover and identify the inversion and translocation mutations that occur within the repetitive sequences. The structural variation detection report of LongRepMarker contains the information of SNPs, INDELS, inversions and translocations.

```

248592 TGACGTTGACACAGCCATCGGCCAGAGAGTTTCATGCAGGAGCTTCACG
248593 AAAAAAACTTCGATAGCGAAATGACTCTGGCCAGTTTAAAAAGTCGGTG
248594 CACCTGGTGACCAAGCGTGGTCGCAACTGACGGTGCCACTGTAAACGT
248595 GACGCTAGAGGTAGACACCGGCCGATGGCGAAACTTGATGTAGGACGTG
248596 TTTACATTAAGTGGTTTTCTGTTCTGATGCCGATAACAGGTACGCACCTAT
248597 GCCTGCCACAGATGCGTGGGTTTCGACCACAAGTTCAGTGAATGCAGGCA
248598 AAAGGACAGTGTTCGCCCGCAGTGGCGGCAACAAGGCCACCCCGCGCAA
248599 AGTGCCAAAACCCGGTGGACTGCCGGAAGTCCCGTACACAGAGGGCAACCT
248600 TCGGGCATTATATCTAGAATGCTTGGCCGATATACGGAGCGTGTCTAGCG
248601 AGGGTGCAAGCTAGACATTAATGTTTAGCTTCATCCAAGCGAACTGTGCC
248602 GAGGCAGAGCTGGCAGCATCGAGCTCGGAGTCCGACTCAGGAGATCGGAG
248603 TTAATGTTTCTGCTCGGTGACAGGACCGTATCTTGGCGGGGATGAAATGGA
248604 TGTGCTGCTGAAGGAATGAGGGTTTTCCACCGACCGCGAGGGAAGGCAG
248605 CCATCCTAGTGGATCATCAGGAAGCCATCTGCATGTCAAGTGAACCCCTC
248606 ACCACAGATTATGGCATAATGTTGGTCTGTTAAAGGGAGTTTGGCTCAAT
248607 CTTCTTTGGCCCGCATCTGCCAGTTCGATGCACCTCTGGAACCGT
248608 >Node_4603#Satellite
248609 GCATTTTTTGTAAAGGGGGGTCATCAAAATTTGCAAAATATGGCCAAA
248610 AAATTTAATTTCCATTTTCGAAACACAGTTTGATTTGGAATTTGATTACGA
248611 GCTCAGTGAGGTATGACATTCATATTCAGACAATATTTTTTATGTTGT
248612 GCAAAAATAAATGATTATTTGATGACCGAAATTTGAAAAAGAGACTGCA
248613 AAAATGTTGAAATGTACAAACGAAATTTTCGTACATAACTGGCTAAAAAT
248614 GGTCACATAGATGTAAGAAATAACTGTTTGGAGCAGTAATACCAGTGTCT
248615 AACGATCCCTATTACTTTTTGAAGGATTTAGGAACTAATTTTTGGATCA
248616 ATTTTCGTATTTCCGTATGGAGGGGGTCATCAAAATTTGCAAAATATGC
248617 CCAAAAAATGTAATTTCCATTTTGAACACAGTTTGATTTGAAATTTTAT
248618 TACGAGCTCAGTGAGGTATGACATTCATATTCAGACTATATTTTTTAT
248619 GTTGTGGCAAAATAAATGATTATTTGATGACCGAAATTTGAAAAACAGA
248620 TTCTGCAAAAATGTTGATATTTACAAACGAAATTTTCGTTATAACTTGT
248621 AAAAATGGTCACATAGATGTAAGAAATACTGTTTAAAGCAGTAATTACC
248622 AGTGCTAACGATCTCTATTACTTTTTGAAGGATTTAGGGAATTAATTTT
248623 TGAATCAATTTTCGATTTTTTGAAGGAGGGTGCATCAAAATTTGCA
248624 AAATTTATGCCAAAAATTTAATTTCCATTTTGAACACAGTTTGATTTGGA
248625 AATTTTATACGAGCTCAGTGAGGTATGACATTCATATTCAGACTATTA
248626 TTTTTATGTTGTGGCAAAATAAATGATTATTTGATGACCGAAATTTGGA
248627 AAAAGAGACTGCAAAAATGTTGAAATGTACAAACGAAATTTTCGTCATA
248628 CTTGGCTAAAAATGGTCACATAGATGTAAGAAATACTGTTTGGAGCAGCT
248629 AATACCAGTCTAACGATCCCTATTACTTTTTGAAGGATTTAGGAA
248630 >Node_4604#LINE/I-Jockey
248631 AAAAAAAGGCTTCCAAATTCAGCCCTTACTAAACGTACCTGATAAACAA
248632 ACAATTAATGCAATATAAAAAACAAATAAATACTACCCAGACTAGCT
248633 CCTCCAAACGTACTGAAAAACAAATAAATAAATAAATAAATAAATAA
248634 CAAATAAATAAATAAATAAATAAATAAATAAATAAATAAATAAATAA
248635 GCACCTGAAAAATAAATAAATAAATAAATAAATAAATAAATAAATAA
248636 TAACCTAATGTAATACTTACCTAATTAATACTTTACATTTATTTTATG
248637 GTATCGTTGGCGGCTCCTTGGCAACAAATCCCGGTCGGCGGCTCCAAG
248638 CTGCCAATCTGACTCAATCGCCACAGACGGCGGCACCTGGCTACTCT
248639 CGCGCAACACCGAGCTGCAATTCCTCCGACGACTCTTGGCCACAACA

```

Fig. S8. A screenshot of the final repeat library with annotation information.

| [Repeat_id]    | [r(repeat)_start] | [r_end] | [chromosome] | [R(Reference)_start] | [R_end]  | [cigar]                             | [identity(%)] |
|----------------|-------------------|---------|--------------|----------------------|----------|-------------------------------------|---------------|
| 664            | 0                 | 664     | uxetra       | 14676059             | 14676724 | 65M10149245                         | 99.699        |
| NODE_10210_688 | 0                 | 664     | uxetra       | 19717683             | 19718345 | 59M117M1157M245                     | 99.699        |
| NODE_10210_688 | 0                 | 688     | uxetra       | 11111988             | 11112675 | 37M1056M117M1181M                   | 99.419        |
| NODE_10210_688 | 0                 | 688     | uxetra       | 11731436             | 11732123 | 37M1056M117M1181M                   | 99.274        |
| NODE_10210_688 | 0                 | 688     | uxetra       | 14470343             | 14471030 | 80M117M1156M1038M                   | 99.419        |
| NODE_10210_688 | 0                 | 688     | uxetra       | 18484471             | 18485159 | 68M                                 | 100.0         |
| NODE_31319_89  | 0                 | 89      | Yhet         | 127186               | 127275   | 89M                                 | 100.0         |
| NODE_31319_89  | 0                 | 89      | U            | 4100082              | 4100171  | 89M                                 | 98.876        |
| NODE_31319_89  | 0                 | 89      | uxetra       | 15117254             | 15117343 | 89M                                 | 100.0         |
| NODE_15965_612 | 0                 | 612     | uxetra       | 22689421             | 22690093 | 612M                                | 100.0         |
| NODE_15965_612 | 40                | 612     | uxetra       | 11395991             | 11396563 | 40S572M                             | 100.0         |
| NODE_13940_644 | 0                 | 644     | uxetra       | 10774706             | 10775320 | 644M30S                             | 100.0         |
| NODE_13940_644 | 0                 | 644     | uxetra       | 17557264             | 17557905 | 644M35S                             | 100.0         |
| NODE_13940_644 | 0                 | 644     | uxetra       | 9886093              | 9886736  | 18M11623M                           | 99.689        |
| NODE_13940_644 | 0                 | 644     | uxetra       | 10439146             | 10439791 | 43M10213M                           | 99.845        |
| NODE_13940_644 | 0                 | 644     | uxetra       | 16641203             | 16646747 | 644M                                | 100.0         |
| NODE_13940_644 | 1                 | 644     | uxetra       | 16456032             | 16456674 | 15621M121M                          | 99.689        |
| NODE_19162_532 | 0                 | 530     | uxetra       | 127                  | 653      | 96M21321M1104M15M2S                 | 97.547        |
| NODE_19162_532 | 0                 | 530     | 3Rhet        | 1799052              | 1799381  | 96M21420M108M2S                     | 98.303        |
| NODE_19162_532 | 0                 | 532     | 3Rhet        | 935534               | 936087   | 8M10524M                            | 99.812        |
| NODE_19162_532 | 0                 | 532     | 3Rhet        | 943169               | 943700   | 8M10421M2101M                       | 98.874        |
| NODE_19162_532 | 0                 | 532     | uxetra       | 13842325             | 13843787 | 522M                                | 100.0         |
| NODE_19162_532 | 26                | 532     | uxetra       | 5884137              | 5884644  | 26S498M1D8M                         | 99.803        |
| NODE_24723_304 | 0                 | 304     | U            | 2819526              | 2819830  | 304M                                | 100.0         |
| NODE_24723_304 | 0                 | 304     | U            | 2831544              | 2831849  | 199M101D8M                          | 98.689        |
| NODE_24723_304 | 0                 | 304     | uxetra       | 4857890              | 4858196  | 101M20203M                          | 98.366        |
| NODE_24723_304 | 0                 | 304     | U            | 6552910              | 6553216  | 199M201D8M                          | 98.366        |
| NODE_24723_304 | 0                 | 304     | uxetra       | 16314530             | 16314834 | 304M                                | 100.0         |
| NODE_24723_304 | 6                 | 304     | uxetra       | 15846912             | 15847212 | 659M20203M                          | 98.366        |
| NODE_4923_797  | 0                 | 797     | U            | 6709860              | 6710467  | 162M1044M6127M413M1510M             | 96.742        |
| NODE_4923_797  | 0                 | 797     | uxetra       | 7548099              | 7548395  | 797M                                | 100.0         |
| NODE_22651_395 | 0                 | 395     | 3R           | 27339712             | 27340107 | 395M                                | 100.0         |
| NODE_22651_395 | 1                 | 391     | 3R           | 27323360             | 27323750 | 15390M4S                            | 97.692        |
| NODE_11265_676 | 0                 | 585     | uxetra       | 17479635             | 17480221 | 562M1023M91S                        | 98.659        |
| NODE_11265_676 | 0                 | 607     | uxetra       | 8748670              | 8749263  | 376M1071M115M69S                    | 98.046        |
| NODE_11265_676 | 0                 | 646     | uxetra       | 19782599             | 19783251 | 376M6027M30S                        | 99.08         |
| NODE_11265_676 | 0                 | 676     | 2Rhet        | 3180632              | 3181315  | 299M10377M                          | 98.243        |
| NODE_11265_676 | 0                 | 676     | uxetra       | 17664469             | 17664969 | 676M                                | 100.0         |
| NODE_11265_676 | 9                 | 676     | uxetra       | 16600168             | 16600842 | 95367M7D300M                        | 98.22         |
| NODE_14680_633 | 0                 | 632     | U            | 4446633              | 4447266  | 453M1017M15S                        | 98.42         |
| NODE_14680_633 | 0                 | 632     | U            | 6376912              | 6377545  | 453M1017M15S                        | 98.42         |
| NODE_14680_633 | 0                 | 633     | 2R           | 2318927              | 2319561  | 453M10180M                          | 97.161        |
| NODE_14680_633 | 0                 | 633     | uxetra       | 2924888              | 2925518  | 176M10188M311M11264M                | 96.53         |
| NODE_14680_633 | 0                 | 633     | uxetra       | 16741507             | 16743139 | 4M1144M1143M10180M                  | 97.95         |
| NODE_14680_633 | 0                 | 633     | uxetra       | 25038436             | 25039069 | 633M                                | 100.0         |
| NODE_20950_466 | 0                 | 466     | uxetra       | 2741896              | 2742362  | 466M                                | 100.0         |
| NODE_20950_466 | 0                 | 466     | uxetra       | 13118465             | 13118931 | 466M                                | 98.927        |
| NODE_20950_466 | 0                 | 466     | uxetra       | 13632570             | 13633035 | 9M1031M21124M                       | 96.988        |
| NODE_20950_466 | 0                 | 466     | uxetra       | 17898115             | 17898579 | 12M21342M                           | 96.996        |
| NODE_20950_466 | 0                 | 466     | uxetra       | 21309589             | 21310355 | 466M                                | 99.142        |
| NODE_20950_466 | 0                 | 466     | uxetra       | 22829827             | 22830292 | 12M21333M109M                       | 96.788        |
| NODE_16342_605 | 0                 | 605     | uxetra       | 25883802             | 25884407 | 605M                                | 100.0         |
| NODE_16342_605 | 133               | 605     | uxetra       | 1928413              | 1928885  | 133S427M                            | 99.788        |
| NODE_20292_491 | 0                 | 472     | uxetra       | 10587997             | 10588463 | 250M1137M313M21148M19S              | 98.305        |
| NODE_20292_491 | 0                 | 491     | 3Lhet        | 2527500              | 2527984  | 11M11142M2139M313M11257M            | 97.556        |
| NODE_20292_491 | 0                 | 491     | uxetra       | 11784031             | 11784521 | 478M112M                            | 98.982        |
| NODE_20292_491 | 0                 | 491     | uxetra       | 25251294             | 25251775 | 96M1078M2120M1191M3131M411152M1112M | 96.138        |
| NODE_20292_491 | 0                 | 491     | uxetra       | 28081808             | 28082299 | 491M                                | 100.0         |
| NODE_20292_491 | 24                | 491     | uxetra       | 14697299             | 14697765 | 24S454M112M                         | 99.143        |
| NODE_1606_1668 | 0                 | 1649    | 2Rhet        | 571460               | 5715108  | 447M1056M21638M19S                  | 99.576        |
| NODE_1606_1668 | 0                 | 1668    | 2Rhet        | 453956               | 454024   | 1668M                               | 100.0         |
| NODE_6052_752  | 0                 | 752     | U            | 7968925              | 7969676  | 752M1120M                           | 99.335        |
| NODE_6052_752  | 0                 | 752     | uxetra       | 8893934              | 88931686 | 752M                                | 100.0         |
| NODE_6052_752  | 0                 | 752     | 2L           | 22410281             | 22411059 | 133M119039M30M20224M                | 96.144        |
| NODE_6052_752  | 0                 | 752     | 2L           | 22413081             | 22413856 | 134M170M2039M40224M                 | 96.903        |
| NODE_6052_752  | 0                 | 752     | 2L           | 22414478             | 22415235 | 47M1059M40224M                      | 98.943        |
| NODE_6052_752  | 19                | 752     | uxetra       | 9966557              | 9967313  | 19S114M19039M40224M                 | 96.429        |
| NODE_10098_689 | 0                 | 689     | U            | 15382705             | 15383665 | 689M26S                             | 98.846        |
| NODE_10098_689 | 0                 | 689     | U            | 9543701              | 9544391  | 207M1059M20317M10157M3S             | 98.696        |
| NODE_10098_689 | 0                 | 689     | Xhet         | 2021577              | 202266   | 689M                                | 99.855        |
| NODE_10098_689 | 0                 | 689     | U            | 3111341              | 3112030  | 689M                                | 98.129        |
| NODE_10098_689 | 0                 | 689     | uxetra       | 17063542             | 17064231 | 689M                                | 100.0         |

Fig. S9. A screenshot of the report that detailed records the distribution of repetitive sequences in the genome.

```

file name: drosophila.fasta
sequences: 2489
total length: 7220516 bp (7217081 bp excl N/X-runs)
GC level: 42.77 %
bases masked: 3787550 bp ( 52.46 %)
=====
              number of      length      percentage
              elements*     occupied  of sequence
-----
SINEs:         2             149 bp    0.00 %
  ALUs         0             0 bp     0.00 %
  MIRs         0             0 bp     0.00 %
LINEs:        1422          1007589 bp 13.95 %
  LINE1        0             0 bp     0.00 %
  LINE2        0             0 bp     0.00 %
  L3/CR1       197          136850 bp 1.90 %
LTR elements: 2794          2367435 bp 32.79 %
  ERVL         0             0 bp     0.00 %
  ERVL-MaLRs  0             0 bp     0.00 %
  ERV_classI   0             0 bp     0.00 %
  ERV_classII  0             0 bp     0.00 %
DNA elements: 546          206292 bp 2.86 %
  AAT-Charlie  0             0 bp     0.00 %
  TolMar-Tigger 0             0 bp     0.00 %
Unclassified: 213          108742 bp 1.51 %
Total interspersed repeats: 3690207 bp 51.11 %

Small RNA:     21           10108 bp 0.14 %
Satellites:    21           6451 bp 0.09 %
Simple repeats: 1130        75978 bp 1.05 %
Low complexity: 290         15723 bp 0.22 %
=====

* most repeats fragmented by insertions or deletions
  have been counted as one element

The query species was assumed to be homo
RepeatMasker Combined Database: Dfam_Consensus-20110127, RepBase-20170127

run with rmblastn version 2.9.0+
The query was compared to classified sequences in ".../dmel-all-chromosome-r5.43_preprocess_repeat.sorted.fasta.classified"

```

**Fig. S10.** A screenshot of the statistical report which detailed records the number of repeats, the proportion and the covered bases of each type of repeats.

```

##fileformat=VCFv4.1
##source=Sniffles
##fileDate=20210313
##contig=<ID=YHet,length=347038>
##contig=<ID=dmel_mitochondrion_genome,length=19517>
##contig=<ID=2L,length=23011544>
##contig=<ID=X,length=22422827>
##contig=<ID=3L,length=24543557>
##contig=<ID=4,length=1351857>
##contig=<ID=2R,length=21146708>
##contig=<ID=3R,length=27905053>
##contig=<ID=Uextra,length=29004656>
##contig=<ID=2RHet,length=3288761>
##contig=<ID=2LHet,length=368872>
##contig=<ID=3LHet,length=2555491>
##contig=<ID=3RHet,length=2517507>
##contig=<ID=U,length=10049037>
##contig=<ID=XHet,length=204112>
##ALT=<ID=DEL,Description="Deletion">
##ALT=<ID=DUP,Description="Duplication">
##ALT=<ID=INV,Description="Inversion">
##ALT=<ID=INVDUP,Description="InvertedDUP with known boundaries">
##ALT=<ID=TRA,Description="Translocation">
##ALT=<ID=INS,Description="Insertion">
##FILTER=<ID=UNRESOLVED,Description="An insertion that is longer than the read and thus we cannot predict the full size.">
##INFO=<ID=CHR2,Number=1,Type=String,Description="Chromosome for END coordinate in case of a translocation">
##INFO=<ID=END,Number=1,Type=Integer,Description="End position of the structural variant">
##INFO=<ID=MAPQ,Number=1,Type=Integer,Description="Median mapping quality of paired-ends">
##INFO=<ID=RE,Number=1,Type=Integer,Description="read support">
##INFO=<ID=IMPRECISE,Number=0,Type=Flag,Description="Imprecise structural variation">
##INFO=<ID=PRECISE,Number=0,Type=Flag,Description="Precise structural variation">
##INFO=<ID=SVLEN,Number=1,Type=Integer,Description="Length of the sv">
##INFO=<ID=REF_strand,Number=2,Type=Integer,Description="Length of the sv">
##INFO=<ID=SVMETHOD,Number=1,Type=String,Description="Type of approach used to detect sv">
##INFO=<ID=SVTYPE,Number=1,Type=String,Description="Type of structural variant">
##INFO=<ID=SEQ,Number=1,Type=String,Description="Extracted sequence from the best representative read.">
##INFO=<ID=STD_quant_start,Number=A,Type=Float,Description="STD of the start breakpoints across the reads.">
##INFO=<ID=STD_quant_stop,Number=A,Type=Float,Description="STD of the stop breakpoints across the reads.">
##INFO=<ID=Kurtosis_quant_start,Number=A,Type=Float,Description="Kurtosis value of the start breakpoints across the reads.">
##INFO=<ID=Kurtosis_quant_stop,Number=A,Type=Float,Description="Kurtosis value of the stop breakpoints across the reads.">
##INFO=<ID=SUPTYPE,Number=A,Type=String,Description="type by which the variant is supported. (SR,ALN,NR)">
##INFO=<ID=STRANDS,Number=A,Type=String,Description="Strand orientation of the adjacency in BEDPE format (DEL:++, DUP:+-, INV:+/-)">
##INFO=<ID=AF,Number=A,Type=Float,Description="Allele Frequency.">
##INFO=<ID=ZMW,Number=A,Type=Integer,Description="Number of ZMWs (Pacbio) supporting sv.">
##FORMAT=<ID=GT,Number=1,Type=String,Description="Genotype">
##FORMAT=<ID=DR,Number=1,Type=Integer,Description="# high-quality reference reads">
##FORMAT=<ID=DV,Number=1,Type=Integer,Description="# high-quality variant reads">
#CHROM POS ID REF ALT QUAL FILTER INFO FORMAT /home/b/11aoxingyu/LongRepMarker_master/Results/RepeatLib.sort.bam
2L 17988361 0 N <DUP> . PASS IMPRECISE;SVMETHOD=snifflesv1.0.11;CHR2=2L;END=17992010;STD_quant_start=1.870829;STD_quant_stop=12.169634;Kurtosis_q
Uextra 34301 1 0 <INV> . PASS IMPRECISE;SVMETHOD=snifflesv1.0.11;CHR2=Uextra;END=228951;STD_quant_start=150.524417;STD_quant_stop=147.687846;Kurtosis_q

```

**Fig. S11.** A screenshot of the structural variation statistical report with VCF format.

#### 1.4.7 How to choose the *k-mer* size

The size of *k-mer* has a certain impact on the processing efficiency of LongRepMarker, because the smaller the size of *k*, the easier it is for *k-mers* to aggregate into unique *k-mer* (*k-mers* to their canonical representation with respect to reverse-complementation which called the unique *k-mer*), which makes the final unique *k-mer* set smaller, thus reducing the time and computational overhead of the subsequent alignment process. Theoretically, the influence of *k-mer* size on the accuracy of the test results is not significant, because the LongRepMarker is to find candidate repetitive sequences by looking for multiple alignment unique *k-mer* and their coverage regions on the reference genome or assembly results. Theoretically, the size of *k-mer* does not affect the acquisition of multiple alignment unique *k-mer* and their coverage regions on the reference genome or assemblies. However, in fact, due to the existence of sequencing error, the size of *k-mer* will have a certain impact on the accuracy of detection results, which is mainly manifested in the small size of *k* (such as less than 11bp). The main reason for this effect is that when the size of *k-mer* is short, it is easy to cause coupling alignment under the combined effect of sequencing error and alignment fault tolerance strategy, which leads to the ordinary unique *k-mer* which is not in the range of multiple alignment unique *k-mer* to be screened into the process of detection, resulting in the final detection results containing a large number of non repetitive elements. In order to solve this problem, we need to limit the minimum value of *k*. In practical application, the following formula is usually used to limit the size of *k*.

$$k \geq \lceil \log_4 G + 1 \rceil \quad (3)$$

Where *k* represents the *k-mer* size, *G* represents the genome size or the total length of assemblies. This formula refers to the readme document of RepeatScout tool (<https://github.com/mmcco/RepeatScout/blob/master/README>). The larger the size of *k-mer*, the greater the number of unique *k-mer* generated. Further more, the larger the size of *k-mer* is, the more disk space and memory are needed. At the same time, the time-consuming of subsequent alignment process will also increase sharply. Due to the limited fault tolerance of the alignment process, the longer the segment is, the lower the probability that it can be aligned to the different locations of the genome. As the size of *k-mer* increases, the accuracy of the detection results is promoted to a certain extent, but it will also cause the excessive consumption of computing resources and affect the integrity of the detection results. Therefore, the size of *k-mer* is not the bigger the better, but it is very difficult to control in practical application, so we can only give an upper limit range of *k* ( $k \in [21, 59]$ , *k* is odd) which is generated based on the actual experience of testing. For example, all experimental results in this study are obtained under the condition of  $k = 49$ .

#### 1.4.8 Reproduction of REPdenovo's detection results on the NA12889 dataset

We have redesigned all comparative experiments in this study. For example, a new detection mode based only on NGS short reads is added in the framework of LongRepMarker, and only the detection results in this mode are compared with RepARK and REPdenovo. In addition, in this round of revision, we re-tested the results of REPdenovo (Supplementary Section S3.5.3). The commands and parameters used in this round of testing are as follows:

```
python ./main.py -c Assembly -g configuration-file-name -r raw-reads-file-name
```

```
python ./main.py -c Scaffolding -g configuration-file-name -r raw-reads-file-name
```

Among the two commands, the first one is to splice the high-frequency *k-mers* into contigs by assembly strategy, while the second one is mainly to scaffolding the contigs generated in the first step, so as to generate longer detection fragments. Since the datasets used in this study is different from the datasets mentioned in the corresponding article of the REPdenovo tool, the corresponding test results will also be different. However, from the overall point of view, although there are some large fragments in REPdenovo's detection results, the total number of fragments is small and the detection results are sparse. This phenomenon can be seen from figures S19-S22 in the supplementary materials.

In order to prove that the commands and parameters were not missed in the process of calling REPdenovo in this study, we reproduced the results of REPdenovo based on the NA12889 dataset. The detailed processing steps and results are shown in Figs.S12-S17, and Tables S7-S8, respectively. Among them, Fig. S12 shows a screenshot of the configuration of the tools that REPdenovo depends. Fig. S13 shows a screenshot of the configuration of the paired-end reads. Fig. S14 shows a screenshot of the running commands and parameters. Fig. S15 shows a screenshot of the detection files generated by REPdenovo. Fig. S16 shows a screenshot of the value of the average coverage of reads, and Fig. S17 shows a screenshot of the final repeat library generated by REPdenovo.

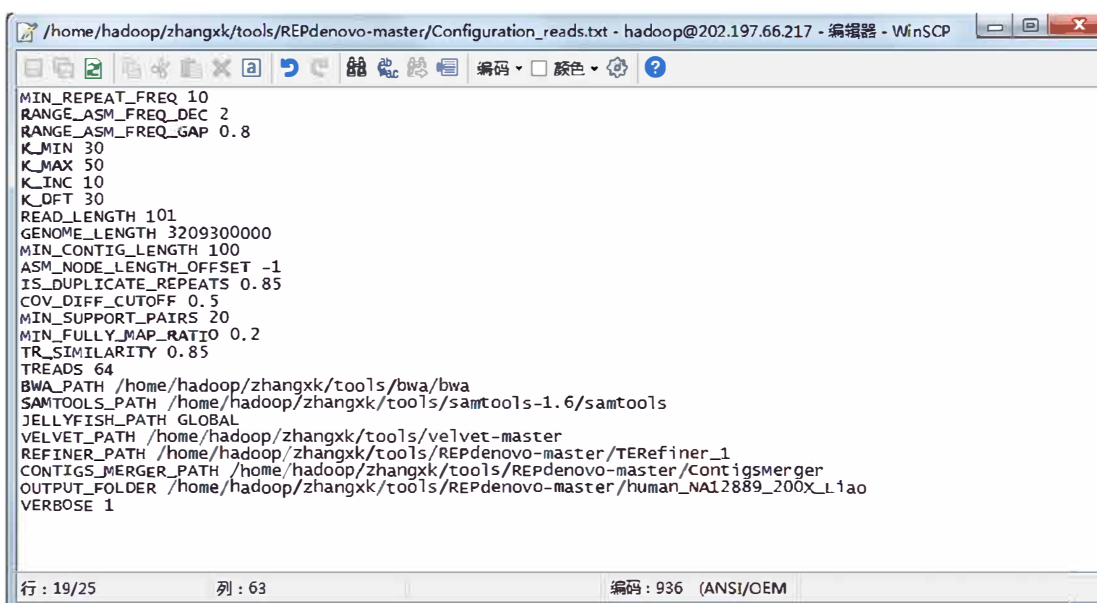

Fig. S12. A screenshot of the configuration of the tools that REPdenovo depends.

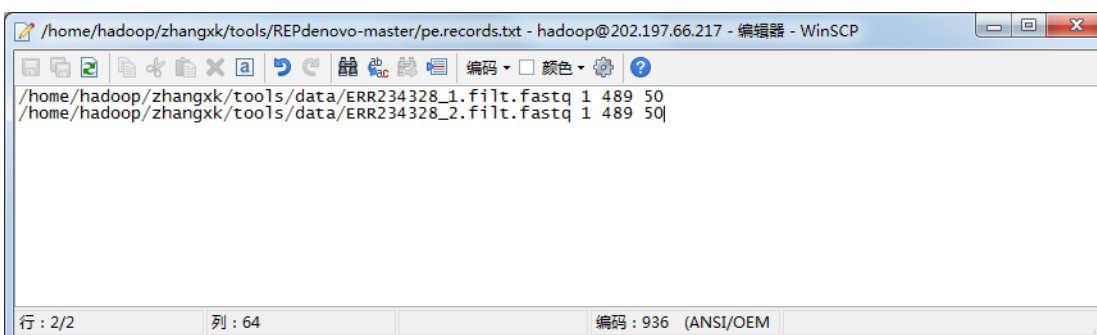

Fig. S13. A screenshot of the configuration of the paired-end reads.

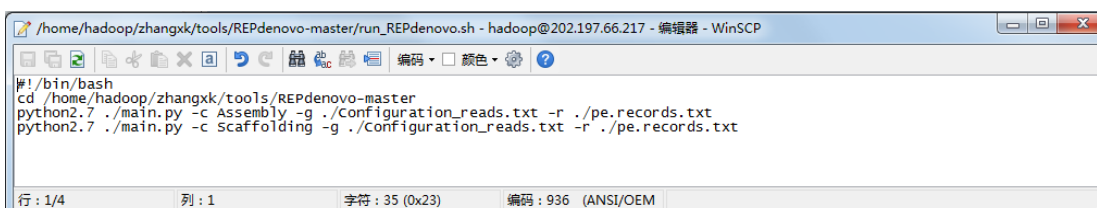

Fig. S14. A screenshot of the running commands and parameters.

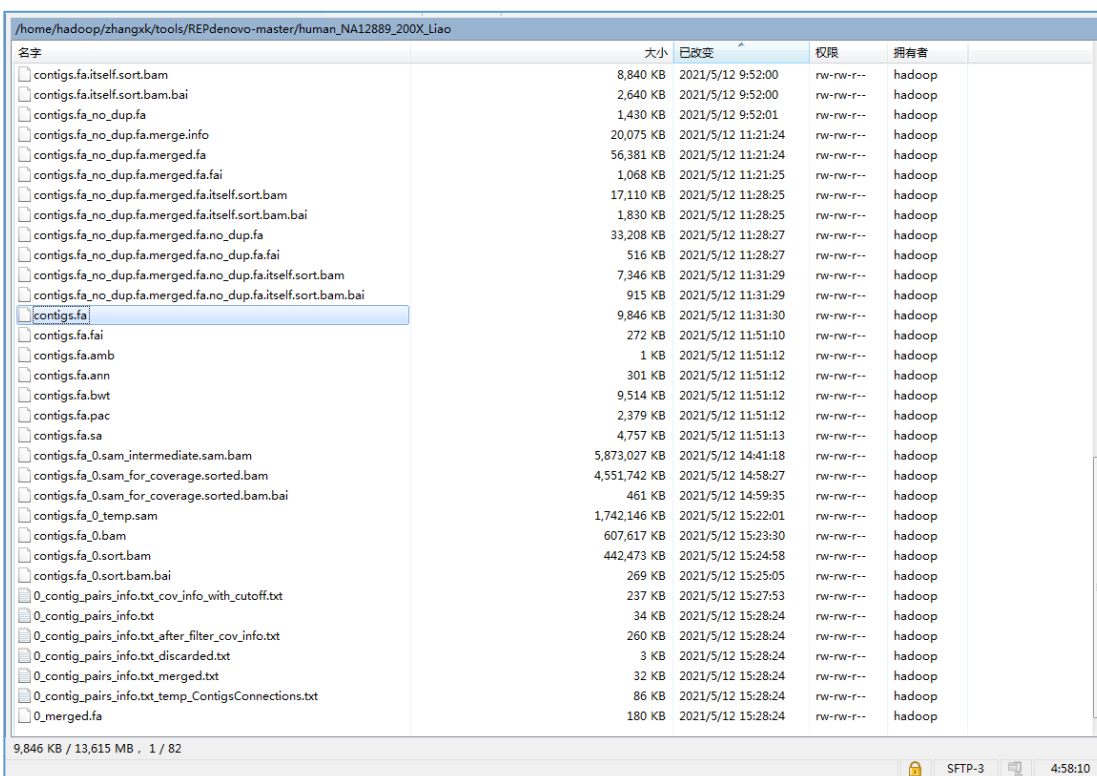

Fig. S15. A screenshot of the detection files generated by REPdenovo.

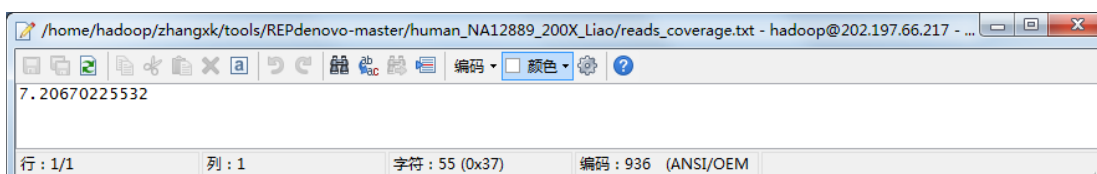

Fig. S16. A screenshot of the value of the average coverage of reads.

```
/home/hadoop/zhangxk/tools/REPdenovo-master/human_NA12889_200X_Liao/contigs.fa - hadoop@202.197.66.217 - 编辑器 - ...
->NEW_CONTIG_MERGE_23
AGGGTTTCCAGAATGCTGTATGAAAAGAAAGGTTAAACTCTGTGAGTGAACGCACACAT
CACAAAGCACTTTCTGAGAATGATTCGTCTGGTTATTATACGAAGATATTTCCTTTTCT
GCAATTGTCCCAAATCGCTTGAAATCTCCACCTGAAAATGCCACAGCAAGAGTGTTC
AATCTGCTCTCTCAAAGCAAGGTTCCAGCTCTGTGAGTTGAATACACACAACAAAAA
GTTACTGAGAATCTTCTTAGCTAGCATGAAAGGAAGAAACCCGTTTGCACGAAGGC
CTCAAAGAGGTCCAAATATCCACTTGCAGATTCACAGAAAGAGTGTTCAAAACCTGCT
TCTATCAATGGCAAAGTTCAACTCTGTTAGTTGAGGACACATATCACCAACAAGTTCTG
AGAATGCTCTGTCCATTTTTATGGGAAGATATTTCCTTTTTCAGCGTAGGCGTCAAGG
CGATCGAAATGTCCACTTCCACAACTACAAAAGAGTGTTCACACTGCTCTATGAAA
GGCCATGTTCACTCTATGAGTTGAATGAAAATATCCGAAAGAAATTTCTGGGAATGCTG
CTGTCTAGTGGTTATATGAATTCCTGCTTCCAACGAAATCTCAAAGCAATCCAAATATC
CACTTGCAGAAATCCAAAAAGAGTGTTCAAAACCTGCTCTATCAATAGAAAGTTCAAC
TCTTTTAGTTGAGTACACACATCACGAACAAGTTTCTGAGAATGCTTCTGTCTGGCTTTT
ATTGGGAAGCTTTCCTTTTACCAAAAGGCATCAAAGCGCTCCAAATGTCCACTTCCAGA
TACTACAAAAGTGTGTTTCAAACCTGTTCTATGAAAAGGAAGTTCACACTGTGACTT
CAATTTGAAACATCCCGATGAAGCTTCTGAGAATGCTTCTGTCTAGTTTTATGGGAAGAT
ATTTCCTTTTTCAACATAGGCCCTCAAAGCGCTCAAATGTCCACTTCCAGGTAGTGCAGA
AAGAGTGTTCAAAACCTGCTCTATAAAAGGGAATATTCACCTCTGTGACTTGAATGCAA
CATCAAAAGCACTTTCTGAGAATGCTTCTATCTAGTTTTATGTGAAGATATTTCTTTT
TCCACACAGGCTCAAAGCCCTCAAACGCTCACTTCCAGATTCCTGAAAAGAGTGTTC
CTATAGCTGCTCTTCAAAGGAAAGTTCAACTCTGGGAGTTGAATACAAACATCACAAA
GTAGTTTCCGAGAATGCTTCTGTTAGTTTTATGTGAAGATGATCCGTTTCCAGTGAA
ATTTCAAAGAGGTCACATATCCCTTGCAGATTCAAAAGAAAGGGTTTCAAACCTG
CTCCATCAGAAGGATTTCAACTCTGTGAGTTGAATGCAATCATCGCAAAAACCTTCT
GAGAATGCTTCTGTCTAGGTTTGTGTGAAGATATAGAGTTTCAAACGAAGGCTCAA
GTGGTCAAATATACACTTGCAGATTTACTACAAGGTTTGCAAAACCTGAAATATCAA
AGGAAGTTCACACTCTGTGAGTTGAATACAAACATCACAAAGAATGTTCTGAGTTTCTT
CCGTTAGTTTGGGAAGTTGATCCGTTTCCAAAGCAATCTCAGAGAGGTTCAAATAT
CCCCTTGTCAGATTCACAAAACGTGTTTGGAACTGCTCCATCATAACGAATGTTCAG
TCCCTGAGTTAACTCCATCTGCAAAAGAAATTTCTGAGAGTGTCTCCGTTGTTTT
TATATGAAGTTCTTTCTTCACTACACAGGCTCAAAGCGGTTCAAATCTCCACTTGC
GATTTCAAAAAGAGTGTTCGAAAACGCTCTATCAAAGGAATGTTCAACTCTGGGAG
TTGAATGCAATCATCACAGAGCTTCTGAGAATGCTTCTATGCTGTTTTTAGGGAAG
ATATTTCCTTTTCAAACAGCTTCCAAAGCCGCTAAATAGCCACTTGCACATTTGAGA
AAAAGTGTCAAAGCTGCGCTATCAAAGGAAAGTTCAACTCTGTGAGGTTGAATGCAA
CATCCAAAGAAAGTTCTGAGAATGCTTCCGTTTACTTTTTAGTTGAAGATTTCCCGTT
TCCAAAGAACTTCAAAGAGTCCAAATATCCCTTCCGATCCACAGAAAGAGTGTTC
TCAAACGCTGTTTTCAAAGGAATTTCAACTCTGTGAGTTGAATGCAATCATCACAAA
GAAGTTCTGACAAAGCTTCTCTAGTTTTATGTGAAGATATTTCTTTTTCCACCACA
GGCCTGAAGCGCTCAAATGTCCACTTGGAGACTACGAAAAGAAATGTTCAAACCTG
CTCTATGAAAAGCAATGTTACTCTGGGAGTTGAACACAAGCCTCAAAGGAGTTTCT
GAGAATGCTTCTGTTTACTTTTTACTGTGAAGATATTTCCGTTTCCAAAGAACTTCA
GACTTCCACTATCCATTTGCAGATGCTAGAAAAGAGAGTTTCAAACCTGCTCTATCAA
AAGGAATGTTCAACTCTGTGAGTTGAATGCAAGTCTATCACAGAGAAGTTTCTGAGAAGGCT
TCTGTCTAGATTTTATGTGAAGATATAGCGGTTTCAAAGGAGGCTCAAAGGCTCCAA
ATATCCACTTGCAGGCTCCAAAAGAGTGTTCAAAACGTGAACCTCAAAGGAAAGGCT
CAACTCTGGACTTGAATGCCAACGTCAGAAGGATGTTTCTGCGAAAGCTTCTGTTAGT
TAGGTGACTT
->NEW_CONTIG_MERGE_24
AGGGTTTCCAGAATGCTGTATGAAAAGAAAGGTTAAACTCTGTGAGTGAACGCACACAT
CACAAAGCACTTTCTGAGAATGATTCGTCTGGTTATTATACGAAGATATTTCCTTTTCT
GCAATTGTCCCAAATCGCTTGAAATCTCCACCTGAAAATGCCACAGCAAGAGTGTTC
AATCTGCTCTCTCAAAGCAAGGTTCCAGCTCTGTGAGTTGAATACACACAACAAAAA
GTTACTGAGAATCTTCTTAGCTAGCATGAAAGGAAGAAACCCGTTTGCACGAAGGC
CTCAAAGAGGTCCAAATATCCACTTGCAGATTCACAGAAAGAGTGTTCAAAACCTGCT
TCTATCAATGGCAAAGTTCAACTCTGTTAGTTGAGGACACATATCACCAACAAGTTCTG
AGAATGCTCTGTCCATTTTTATGGGAAGATATTTCCTTTTTCAGCGTAGGCGTCAAGG
CGATCGAAATGTCCACTTCCACAACTACAAAAGAGTGTTCACACTGCTCTATGAAA
GGCCATGTTCACTCTATGAGTTGAATGAAAATATCCGAAAGAAATTTCTGGGAATGCTG
CTGTCTAGTGGTTATATGAATTCCTGCTTCCAACGAAATCTCAAAGCAATCCAAATATC
CACTTGCAGAAATCCAAAAAGAGTGTTCAAAACCTGCTCTATCAATAGAAAGTTCAAC
TCTTTTAGTTGAGTACACACATCACGAACAAGTTTCTGAGAATGCTTCTGTCTGGCTTTT
ATTGGGAAGCTTTCCTTTTACCAAAAGGCATCAAAGCGCTCCAAATGTCCACTTCCAGA
TACTACAAAAGTGTGTTTCAAACCTGTTCTATGAAAAGGAAGTTCACACTGTGACTT
CAATTTGAAACATCCCGATGAAGCTTCTGAGAATGCTTCTGTCTAGTTTTATGGGAAGAT
ATTTCCTTTTTCAACATAGGCCCTCAAAGCGCTCAAATGTCCACTTCCAGGTAGTGCAGA
```

Fig. S17. A screenshot of the final repeat library generated by REPdenovo.

**Table S7.** Sequence reads information of dataset NA12889.

| Individual | Population | #of reads   | Read length | Coverage |
|------------|------------|-------------|-------------|----------|
| NA12889    | CEU        | 228,944,748 | 101         | 7.2067   |

**Table S8.** Assembly quality of REPdenovo on dataset NA12889.

| Individual | K_MIN | K_MAX | K_INT | K_DFT | N    | N_h | Max fragment (bp) | N50 (bp) |
|------------|-------|-------|-------|-------|------|-----|-------------------|----------|
| NA12889    | 30    | 50    | 10    | 30    | 5890 | 80  | 23,178            | 3,090    |

'N' represents the number of assembled contigs. 'N<sub>h</sub>' represents the number of complete RepBase hits from the N repeats.

#### 1.4.9 Which repeat group is used in the RepBase for the comparison of performance between LongRepMarker and other tools? What are those not covered ones?

The evaluations in this study are all based on RepeatMasker. The library used by RepeatMasker is a combination of RepBase and Dfam. The latest value of the proportion of the detection results of LongRepMarker covering the combination of RepBase and Dfam is 82.45%, just as shown in Table S19. The total number of sequences in combination of RepBase and Dfam of human that cannot be covered by the detection results of LongRepMarker is 154, accounting for 17.42% of the total sequences in the corresponding library. The classification of repetitive sequences in human RepBase library that cannot be covered by the detection results of LongRepMarker is shown in Table S9 below.

**Table S9.** The classification of repetitive sequences in human RepBase library that cannot be covered by the detection results of LongRepMarker.

| Main class                      | Subclass      | Number |
|---------------------------------|---------------|--------|
| ARTEFACT                        | -             | 7      |
| Low complexity                  | -             | 2      |
| DNA                             | Merlin        | 3      |
|                                 | Crypton-A?    | 2      |
|                                 | Crypton       | 5      |
|                                 | TcMar-Pogo    | 1      |
|                                 | PIF-Harbinger | 2      |
|                                 | TcMar-Tigger  | 5      |
|                                 | hAT-Tip100?   | 1      |
|                                 | hAT-Ac        | 1      |
|                                 | hAT           | 4      |
|                                 | hAT-Blackjack | 1      |
|                                 | TcMar-Mariner | 1      |
|                                 | hAT-Charlie   | 1      |
|                                 | hAT-hAT19     | 1      |
|                                 | hAT-Tip100    | 5      |
|                                 | TcMar-Tc1     | 1      |
|                                 | TcMar?        | 1      |
| Other                           | 13            |        |
| LTR                             | ERVL          | 1      |
|                                 | ERV1?         | 1      |
|                                 | Gypsy         | 1      |
|                                 | Other         | 1      |
| scRNA                           | -             | 1      |
| snRNA                           | -             | 2      |
| tRNA                            | -             | 7      |
| RC?                             | Helitron?     | 1      |
| SINE                            | tRNA          | 1      |
|                                 | tRNA-Deu      | 1      |
| LINE                            | Dong-R4       | 1      |
|                                 | CR1           | 13     |
|                                 | L1            | 1      |
|                                 | Penelope      | 1      |
|                                 | L2            | 3      |
|                                 | RTE-BovB      | 1      |
|                                 | I-Jockey      | 1      |
| DNA?                            | PiggyBac?     | 1      |
|                                 | Other         | 12     |
| LTR?                            | -             | 4      |
| Unknown                         | -             | 42     |
| Total number of sequence is 154 |               |        |



## 2 Methods

### 2.1 The specific commands and parameters for obtaining the overlap sequences

In this step, minimap2[88] is used for generating overlap sequences between and within chromosomes or contigs. The command line for running minimap2 is as follows: ' minimap2 -x ava-pb ./contigs.fasta ./contigs.fasta > ./ovlp.paf '.

### 2.2 Conversion of overlap sequences into unique $k$ -mers

The counting of  $k$ -mer frequency in the sequencing data can be carried out using many of the currently available tools, such as Jellyfish[89], DSK[90] and KMC2[91]. In this study, we use DSK for  $k$ -mer frequency statistics. Note that before counting,  $k$ -mer size  $k$  needs to be determined.  $k$  should be kept small to prevent the overuse of computer memory. Counting  $k$ -mer frequency from either the reference genome sequence or sequenced reads data is one of the most fundamental analyses in bioinformatics. To estimate genomic characters, the  $k$ -mer size  $k$  should be determined under the logic that the space of  $k$ -mer ( $4^k$ ) should be several times larger than the genome size ( $G$ ), so that few  $k$ -mers derived from different genomic positions will merge together by chance, i.e. most  $k$ -mers in the genome will appear uniquely. In practice, we often require the  $k$ -mer space to be at least 5 times larger than the genome size and the larger the better. The rule for  $k$ -mer size selection is expressed as follows.

$$4^k > 5 * G \quad (4)$$

DSK (disk streaming of  $k$ -mers) is a new streaming algorithm for  $k$ -mer counting, which only requires a fixed, user-defined amount of memory and disk space. This approach realizes a memory, time and disk trade-off. The multi-set of all  $k$ -mers present in the reads is partitioned and partitions are saved to disk. Then, each partition is separately loaded in memory in a temporary hash table. The  $k$ -mer counts are returned by traversing each hash table. Low-abundance  $k$ -mers are optionally filtered. DSK is the first approach that is able to count all the 27-mers of a human genome dataset using only 4.0 GB of memory and moderate disk space (160 GB), in 17.9 hours. DSK can replace popular  $k$ -mer counting software (Jellyfish) on small-memory servers. In this step, DSK is used for generating unique  $k$ -mers, the specific operations and calculation complexity analysis are as follows. Assuming that there are  $n$  sequences, which respectively correspond to  $n$  fragments in an overlap file. Let  $c_i$  be the  $i$ -th fragment ( $i=1,2,\dots,n$ ), and  $lc_i$  be the length of  $c_i$ . Given a fix length  $k$  of  $k$ -mers ( $k \ll lc_i$ ),  $c_i$  can be represented as a list of  $(lc_i - k + 1)$   $k$ -mers. Therefore, the total number of  $k$ -mers ( $Num_k$ ) that are transferred from all fragments can be expressed as follows.

$$Num_k = \sum_{i=1}^n (lc_i - k + 1) \quad (5)$$

When the value of  $lc$  is large and the value of  $k$  is small, the total number of  $k$ -mer generated from these overlap sequences is very large. In order to further reduce the total number of  $k$ -mers, DSK converts all  $k$ -mers to their canonical representation with respect to reverse-complementation which called the unique  $k$ -mers. In other words, a  $k$ -mer and its reverse complement are considered to be the same object. For example, with  $k=3$  and assuming the  $k$ -mer AAA and its reverse complement TTT are both present in the input dataset, DSK considers that one of them is the canonical  $k$ -mer, e.g. AAA. If AAA is present 2 times and TTT 3 times, then DSK outputs that the count of AAA is 5 and does not return the count of TTT at all. It is noticed that a canonical  $k$ -mer is not necessarily the lexicographically smallest one.

DSK uses a different ordering for faster performance. Specifically, it considers that  $A < C < T < G$  and returns the lexicographically smaller  $k$ -mer in this alphabet order. So, in the example above, AAA is indeed the canonical  $k$ -mer. For the GTA/TAC pair, the lexicographically smallest is GTA while the canonical  $k$ -mer is TAC (as DSK considers that  $T < G$ ). The  $k$ -mer obtained by merging  $k$ -mer and its reverse-complementation is called the unique  $k$ -mer. Assuming that the length of  $c_i$  is  $lc_i$ , the average read coverage of  $c_i$  is  $C_i$ . Then, each  $k$ -mer appearing on  $c_i$  has an average of  $C_i$  reads corresponding to it, just as shown in Fig. S18. The relationship between the total number of reads ( $Num_r$ ) and the total number of  $k$ -mers ( $Num_k$ ) can be expressed as follows.

$$Num_r = C_i \times Num_k = C_i \times \sum_{i=1}^n (lc_i - k + 1) \quad (6)$$

From Equation (6), we can see that the total number of reads appeared on the  $i$ -th fragment is  $C$  times the total number of unique  $k$ -mers appeared on the  $i$ -th fragment, where  $C$  is the average read coverage of sequencing. In practical applications, the average depth of the next generation sequencing data can reach dozens to hundreds of layers. Therefore, using the converted unique  $k$ -mers instead of the reads for mapping can greatly reduce the complexity of the alignment. The quantitative relationship among reads,  $k$ -mers and the unique  $k$ -mers is shown in Fig. S18.

In addition, a  $k$ -mer and its reverse complement are considered to be the same object in DSK, so that the actual number of converted unique  $k$ -mers is much smaller than the actual number of  $k$ -mers directly converted from the original sequences. Therefore, using unique  $k$ -mer instead of  $k$ -mer for mapping can further greatly reduce the complexity of the alignment. The relationship between the total number of

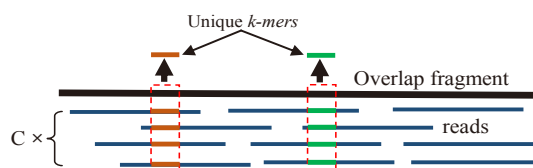

**Fig. S18.** The quantitative relationship between reads and  $k$ -mers, where the long black line represents chromosome or contig, short black lines represent reads and  $C$  indicates the average read coverage of the chromosome or contig.

alignment using read ( $AlignNum_r$ ), the total number of alignment using  $k$ -mer ( $AlignNum_k$ ) and the total number of alignment using the unique  $k$ -mer ( $AlignNum_{uk}$ ) can be expressed as follows.

$$AlignNum_r = C_i \times AlignNum_k = C_i \times \sum_{i=1}^n (lc_i - k + 1) \gg AlignNum_{uk} \quad (7)$$

A practical example of the quantitative relationship among  $k$ -mers and the unique  $k$ -mers is shown in Table S10. From Table S10, we can see that a piece of DNA sequence which is composed as ' ATTCGCTGATCATGTTTCGA '. Then, there are 16  $4$ -mer generated from this sequence. After that, there are 13 unique  $4$ -mer generated from this sequence. From the quantitative relationship, we can know that there is a big difference between the  $k$ -mer and the unique  $k$ -mer in this short sequence, and this difference will be more obvious when the sequence increase and grows.

**Table S10.** A practical example of the quantitative relationship among  $k$ -mers and the unique  $k$ -mers.

---

Here is a piece of DNA sequence, its base arrangement is composed as follows:  
ATTCGCTGATCATGTTTCGA

---

Then the generated  $k$ -mer set is:  
ATTC, TTCG, TCGC, CGCT, GCTG, CTGA, TGAT, GATC,  
ATCA, TCAT, CATG, ATGT, TGTT, GTTC, TTTC, TCGA

---

The generated unique  $k$ -mer set is:  
ATTC, TTCG, TCGC, CGCT, GCTG, CTGA, TGAT, ATCA  
TCAT, ATGT, TGTT, GTTC, TTTC

---

### 2.3 Generation of multi-alignment unique $k$ -mers and their coverage regions on overlap sequences

LongRepMarker uses the multiple sequence alignment to find out the unique  $k$ -mers which can be aligned to different locations on overlap sequences and the regions on overlap sequences that can be covered by these multi-alignment unique  $k$ -mers. The process of generating the multi-alignment unique  $k$ -mers is described by *Algorithm 1*, and the process of generating the regions on overlap sequences that can be covered with these multi-alignment unique  $k$ -mers is described in *Algorithm 2*. The time complexity of these two algorithms is  $O(n)$ . The results of the multiple sequence alignment are stored in a bam file. When LongRepMarker gets the bam file. First of all, LongRepMarker filters the file and keeps the multiple alignment records and the ID of multi-alignment unique  $k$ -mers when it gets the bam file. Secondly, it converts the filtered bam file into a depth file via the samtools[92]. Finally, based on the information provided by the depth file and the ID records of multi-alignment unique  $k$ -mers, it extracts the regions on overlap sequences that can be covered with these multi-alignment unique  $k$ -mers, and forms several sequence fragments which are called sequence fragments with high probability of repetitive regions. The principle of generating fragments with high probability of repetitive regions is shown in Figs. S19(A) and S19(B).

---

#### Algorithm 1: Generation of multi-alignment unique $k$ -mers

---

**Input:** Unique  $k$ -mers; overlap sequences  
**Output:** The bam file; a set of serial numbers of multi-alignment unique  $k$ -mers

- 1 Initialize;
- 2 Let  $T\langle k\text{-mer\_id}, k\text{-mer\_fre}\rangle$  be the set used to store the ID and frequency of each unique  $k$ -mer;
- 3 Let  $M\langle k\text{-mer\_id}\rangle$  be the set used to store the ID of each multi-alignment unique  $k$ -mer;
- 4  $k\text{-mer\_id} \leftarrow \text{null}$ ; //Initialize of  $k\text{-mer\_id}$ ;
- 5  $k\text{-mer\_fre} \leftarrow 0$ ; //Initialize of  $k\text{-mer\_fre}$ ;
- 6 Map all unique  $k$ -mers to overlap sequences to generate a bam file;
- 7 **while** not at end of the bam file **do**
- 8     Get the ID of the unique  $k$ -mer in the current line;
- 9     **if**  $ID \notin T$  **then**
- 10         Create a new unit  $R$  in set  $T$ ;
- 11          $R.k\text{-mer\_id} \leftarrow ID$ ;
- 12          $R.k\text{-mer\_fre} \leftarrow 1$ ;
- 13     **else**
- 14         Get the unit  $S$  marked with  $ID$ ;
- 15          $S.k\text{-mer\_fre} \leftarrow S.k\text{-mer\_fre} + 1$ ;
- 16     **end**
- 17 **end**
- 18 **while** not at end of the set  $T$  **do**
- 19     Get a record  $C$  in set  $T$ ;
- 20     **if**  $C.k\text{-mer\_fre} > 1$  **then**
- 21         Create a new unit  $G$  in set  $M$ ;
- 22          $G.k\text{-mer\_id} \leftarrow C.k\text{-mer\_id}$ ;
- 23     **else**
- 24         Continue;
- 25     **end**
- 26 **end**
- 27  $T \leftarrow \emptyset$ ;
- 28 Return  $M$  and bam file;

---

---

**Algorithm 2:** Generation of the regions on overlap sequences that can be covered by multi-alignment  $k$ -mers

---

**Input:** The bam file generated by Algorithm 1;  $E$  ( a set of overlap sequence);  $U$  (a set of serial numbers of the multi-alignment  $k$ -mers)

**Output:** The regions on overlap sequences that can be covered by multi-alignment  $k$ -mers

- 1 Initialize;
- 2 Let file  $F$  be used to store the filtered bam file;
- 3 Let  $D[i][E_i.length]$  be the character array used to store the  $i$ -th fragment in overlap sequences. Each unit from  $D[i][0]$  to  $D[i][E_i.length]$  is used to store every character of the  $i$ -th fragment in overlap sequences;
- 4 Let  $S$  be the set used to store the regions on overlap sequences that can be covered by multi-alignment  $k$ -mers;
- 5  $S \leftarrow \text{null}$ ; //Initialize  $S$ ;
- 6  $D \leftarrow \text{null}$ ; //Initialize  $D$ ;
- 7  $F \leftarrow \text{null}$ ; //Initialize  $F$ ;
- 8 **while** not at end of the bam file **do**
- 9     Get the  $ID$  of the unique  $k$ -mer in the current line;
- 10    **if**  $ID \in U$  or  $\text{line.StartWith('@')}$  **then**
- 11     | Write the current line to the file  $F$ ;
- 12    **else**
- 13     | Continue; //Non-multiple alignment record;
- 14    **end**
- 15 **end**
- 16 Convert the file  $F$  to a depth file  $P$  by samtools;
- 17 Group file  $P$  by the first column;
- 18 **while** not at end of the file  $P$  **do**
- 19     Get a record  $W$  in file  $P$ ;
- 20      $c_1 \leftarrow W.firstcolumn$  //The first column of depth file indicates the segment ID;
- 21      $c_2 \leftarrow W.secondcolumn$  //The second column of depth file indicates the location on segment;
- 22      $c_3 \leftarrow W.thirdcolumn$  //The third column of depth file indicates the depth of location on segment;
- 23     **if** ( $c_3 > 0$ ) **then**
- 24         |  $D[c_1][c_2] = E[c_1].charAt(c_2 - 1)$  ;
- 25         | //Get the corresponding character;
- 26     **else**
- 27         |  $D[c_1][c_2] = 'N'$  ;
- 28         | //Uncovered location filling 'N' ;
- 29     **end**
- 30 **end**
- 31 **for** each  $i \in E.size()$  **do**
- 32     |  $SeqString \leftarrow (D[i][E_i.length]).toString()$ ;
- 33     | //Array to string;
- 34     | Create a new unit  $G$  in set  $S$ ;
- 35     |  $G \leftarrow SeqString.SplitBy('N')$ ;
- 36     | //Splitting string by 'N';
- 37 **end**
- 38  $F \leftarrow \emptyset$ ;  $D \leftarrow \emptyset$ ;
- 39 Return  $S$ ;

---

## 2.4 The detailed principle of the combination of multiple threads parallel computing model and $k$ -mer based multiple sequence alignment

LongRepMarker is designed based on the multiple threads parallel computing model and  $k$ -mer based multiple sequence alignment. It cuts a file consisting of all unique  $k$ -mers into multiple sub-files and aligns them separately with the overlap sequences in parallel (to facilitate parallel computing, the number of subfiles is set to the number of threads). The alignment results generated in the previous step (generation of multi-alignment unique  $k$ -mers and their coverage regions on original sequences) need to be used in this step. The principle of generating the regions on overlap sequences that can be covered by multi-alignment unique  $k$ -mers based on the parallel computing model is shown in Fig. S19(C). In Fig. S19(C), the different colored areas in different dashed boxes represent parallel units.

## 2.5 Classification of regions on overlap sequences that can be covered by the multi-alignment $k$ -mers

The regions on original sequences (chromosomes or contigs) covered by the multi-alignment  $k$ -mers can be divided into two categories. The regions in the first category can be aligned to different locations ( $\geq 2$  locations) of the overlap sequences, which are highly likely to be repeats, so they are stored into the final repeat library directly. The regions in the second category cannot be aligned to the overlap sequences many times, but some sub-segments of them can be aligned to overlap sequences many times, which are probably caused by coupling matches due to sequencing errors (e.g., the two sequences are originally not repetitive sequences, due to sequencing errors that form some coupled alignments under error-tolerant conditions, resulting in multiple subsequences within them that can be aligned with each other. These two sequences should be removed) or the genetic variations (e.g., the two sequences are originally repetitive sequences, due to structural variations, multiple subsequences within them cannot be aligned with each other. These two sequences should be retained). The characteristic of coupling alignment due to the sequencing errors is that the alignment region is short and scattered, and it accounts for a relatively small proportion of the entire sequence fragment. On the contrary, the distribution of structural variation regions on the sequence fragment is relatively concentrated, and all have a certain length (e.g., greater than 50bp). Based on these obvious features, we can further filter these non-multiple aligned sequences. The coupling alignment due to sequencing errors, and conflict alignment due to SVs are shown in Fig. S20. The method used to distinguish two categories of alignment regions is described in detail in Section S3.7.

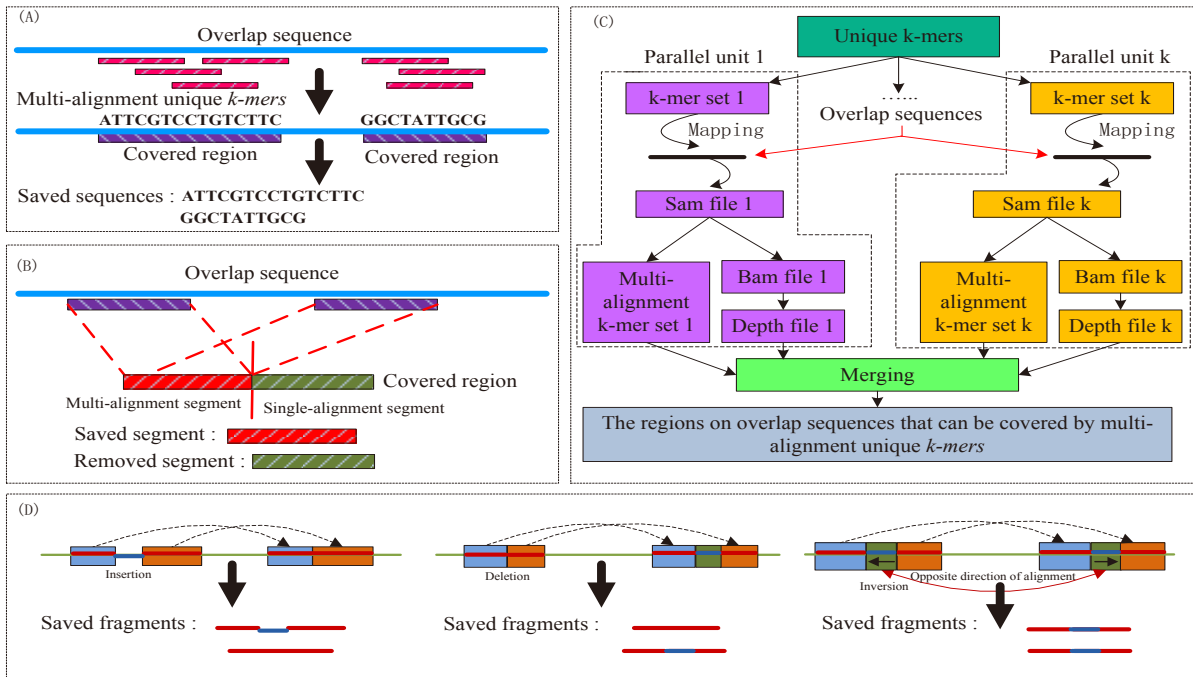

**Fig. S19.** The processing principle of some steps of LongRepMarker. The sub-graph(A) shows the principle of generating the regions on overlap sequences that can be covered by the multi-alignment unique  $k$ -mers; The sub-graph(B) shows the principle of processing the maximum multi-alignment sub-segments in the non multi-alignment fragment; The sub-graph (C) shows the principle of the parallel computing model in LongRepMarker; The sub-graph (D) shows the principle of identification of the genetic variations existing in the repetitive regions; Rectangles of red color in Sub-graph(A) represent the multi-alignment unique  $k$ -mers, and the rectangles of violet color represent their covered regions on overlap sequence; Rectangles of red color in in sub-graph(B) represent the multi-alignment segments in covered regions, and rectangles of green color represent the single-alignment segments in covered regions; In sub-graph(C), the different colored areas in different dashed boxes represent parallel units; The orange and blue rectangles in Sub-graph(D) represent the two subsequences in a pair of repetitive regions, and the green rectangles represent the regions of genetic variations.

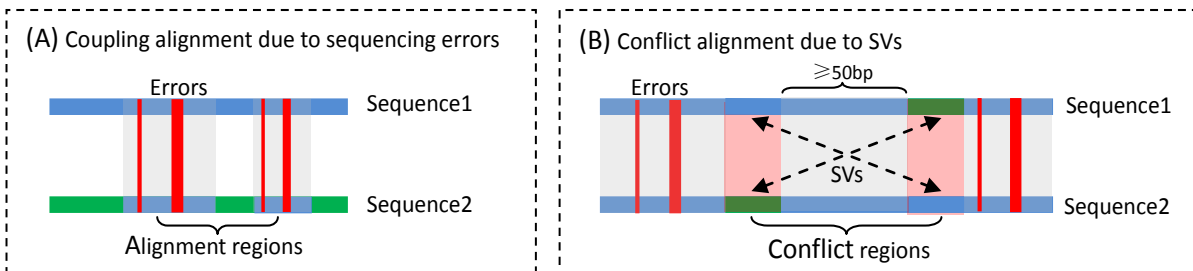

**Fig. S20.** Coupling alignment due to sequencing errors, and conflict alignment due to SVs. The light blue regions in sub-figure (A) indicate the coupling alignment regions caused by sequencing errors. The light blue regions in sub-figure (B) indicate the alignment regions, and the light red regions indicate the conflict regions caused by structural variations.

### 3 Results

#### 3.1 Benchmarking methods and its configurations

In order to further illustrate the superior effectiveness of LongRepMarker, we compared it to the four famous methods in the field of repeat detection which are: RepeatScout, RepeatModel2, RepeatMasker, RepARK, REPdenovo and RepLong.

The running commands of RepeatScout are configured as './build\_lmer\_table -sequence \$ref -freq \$freq; ./RepeatScout -sequence \$ref3 -output \$repeats\_out3 -freq \$freq; ./filter-stage-1.prl \$repeats\_out > \$filtered\_out'. The running commands of RepeatModel2 are configured as '< RepeatModelerPath > / Build-Database -name elephant elephant.fa, nohup < RepeatModelerPath > /RepeatModeler -database elephant -pa 20 -LTRStruct > & run.out & '. The running command of RepeatMasker is configured as: 'RepeatMasker -pa 128 -lib ./RepeatLib.fa -dir ./DetectionResults/ ./reference.fasta'.

The running command of RepARK is configured as 'RepARK.pl -p 24 -l ./left.fq -l ./right.fq -o output'. The running command of REPdenovo is configured as 'main.py -c Assembly -g ./sample\_configuration.txt -r ./sample\_input\_paired\_end\_reads.txt, python ./main.py -c Scaffolding -g configuration-file-name -r raw-reads-file-name'. The running command of RepLong is configured as './replong.sh -f human\_100k.fa -s 500M -t /2T/hum\_100k'. When processing the dataset of Drosophila melanogaster, we use two different parameters to evaluate the performance of RepARK, the first one is the default parameter and the second parameter is  $t=84$  which is given in the corresponding paper. Except for Drosophila dataset, RepARK uses default parameters when testing on other datasets. In this experiment, the parameters of REPdenovo are set to the default.

To provide unbiased evaluation, we used the assembly evaluation tool Quast, the multiple sequence alignment tool minimap2, and the repeat annotation tool RepeatMasker to comprehensively evaluate the repetitive regions generated from each of the compared tools in the experiment. The configuration of tools (Benchmarking and evaluation tools) is shown in Table S11.

#### 3.2 Hardware Configuration

All benchmarkings were done on a computer with 24 cores and the memory of 512GB (Intel Xeon E5-2620 2.00 GHz), and the hardware configuration is shown in Fig. S21.

Table S11. Details of benchmarking tools

| Tools         | Version   | Requirements                                                       | Benchmarking tools                                                                                                                                                                                                                                                                                            |
|---------------|-----------|--------------------------------------------------------------------|---------------------------------------------------------------------------------------------------------------------------------------------------------------------------------------------------------------------------------------------------------------------------------------------------------------|
|               |           |                                                                    | Running commands and parameters configuration                                                                                                                                                                                                                                                                 |
| AByss         | v2.2.4    | gcc 4.6 or above;Boost;Open MPI                                    | abyss-pe k=49 l=40 n=5 s=1000 name=test in='./left.fastq ./right.fastq'                                                                                                                                                                                                                                       |
| SOAPdenovo2   | 2.04-r241 | gcc 3.0 or above                                                   | ./SOAPdenovo all -s config_file -K 25 -R -D 1 -d -o graph_prefix 1>ass.log 2>ass.err                                                                                                                                                                                                                          |
| SPAdes        | v3.10.0   | gcc 4.8.2;cmake2.8.12;zlib;libbz2                                  | spades.py -t 64 -pe1-1 ./left.fastq -pe1-2 ./right.fastq -o ./output > ./output/out.log                                                                                                                                                                                                                       |
| IDBA-UD       | v1.3.0    | gcc 4.7 or above                                                   | fq2fa -merge -filter ./fastq1 ./fastq2 ./read.fa<br>idba_ud -r ./read.fa -o ./output                                                                                                                                                                                                                          |
| RepeatScout   | v3.2.1    | gcc 4.7 or above                                                   | ./build_lmer_table -sequence \$ref -freq \$freq<br>./RepeatScout -sequence \$ref3 -output \$repeats_out3 -freq \$freq<br>./filter-stage-1.prl \$repeats_out > \$filtered_out                                                                                                                                  |
| RepeatModel2  | v3.2.1    | gcc 4.7 or above                                                   | <RepeatModelerPath> / BuildDatabase -name elephant elephant.fa<br>nohup <RepeatModelerPath> /RepeatModeler -database elephant -pa 20 -LTRStruct > & run.out &                                                                                                                                                 |
| RepARK        | v1        | Perl5;Jellyfish2.1.4;Velvet1.2.08                                  | RepARK.pl -p 24 -l ./left.fastq -l ./right.fastq -o output_folder                                                                                                                                                                                                                                             |
| REPdenovo     | v1.0.3    | Python2.7;Jellyfish2.1.4;Velvet1.2.08                              | python ./main.py -c Assembly -g configuration-file-name -r raw-reads-file-name<br>python ./main.py -c Scaffolding -g configuration-file-name -r raw-reads-file-name                                                                                                                                           |
| MECAT2        | v2        | gcc 4.7 or above; HDF5                                             | mecat2pw -j 0 -d ecoli_filtered.fastq -o ecoli_filtered.fastq.pm.can -w wrk_dir -t 16<br>mecat2cns -i 0 -t 16 ecoli_filtered.fastq.pm.can ecoli_filtered.fastq corrected_ecoli_filtered                                                                                                                       |
| RepLong       | v0.0.1    | faidx version 0.4.7.1; Canu 1.4; python(2.7 or 3.4 above) ; jdk1.8 | ./replong.sh -f <long reads fasta> -s <an estimate of the whole genome size> -t <place of temporary files> [-a <faidx path>] [-j <java path>] [-r minimum read length] [-o minimum overlap length] [-h maximum thread] [-e maximum memory] [-c true]                                                          |
| LongRepMarker | v0.0.1    | gcc 4.7 or above; Python2.7; jdk1.8                                | java LongRepMarker [-r reference sequence] [-q1 1-th fastq file] [-q2 2-th fastq file] [-k k-mer size] [-X 10X linked reads] [-l SMS long reads] [-m the minimum length of repeat] [-t threads] [-Q effective size evaluation] [-M multi-alignment evaluation] [-v structure variation detection] [-o output] |
| LRSIM         | v0.0.1    | Math.Random; Inline; perl5                                         | ./simulateLinkedReads.pl -r/-g <reference/haplotypes> -p <output prefix> [options]                                                                                                                                                                                                                            |
| minimap2      | v2.2.17   | GNU g++ 4.0                                                        | minimap2 -d ./ref_Align.mmi ./reference.fasta<br>minimap2 -a -t 32 ./ref_Align.mmi ./regions.fasta > ./regions.sam                                                                                                                                                                                            |
| quast         | v4.3      | Python3.5                                                          | quast.py ./RepLib.fa -r ./Ref.fa -o ./QuastResults                                                                                                                                                                                                                                                            |
| RepeatMasker  | v1.1.3    | Perl5                                                              | RepeatMasker -parallel 30 -lib ./Lib.fa -html -gff -dir ./output ./Repbases.fa                                                                                                                                                                                                                                |

| CPU                 |                                                         | RAM              |                                                                                                      | DISK                |       |
|---------------------|---------------------------------------------------------|------------------|------------------------------------------------------------------------------------------------------|---------------------|-------|
| Parameters          | Value                                                   | Parameters       | Value                                                                                                | Parameters          | Value |
| Architecture        | X86_64                                                  | Total Mem        | 251G                                                                                                 | /dev/mapper/cl-root | 50G   |
| CPU op-mode(s)      | 32-bit, 64-bit                                          | Total Swap       | 4.0G                                                                                                 | devtmpfs            | 126G  |
| Byte Order          | Little Endian                                           | Buff/Cache       | 231G                                                                                                 | tmpfs               | 126G  |
| CPU(s)              | 40                                                      |                  |                                                                                                      | tmpfs               | 126G  |
| On-line CPU(s) list | 0-39                                                    |                  |                                                                                                      | /dev/sda2           | 1014M |
| Thread(s) per core  | 2                                                       |                  |                                                                                                      | /dev/sda1           | 200M  |
| Core(s) per socket  | 10                                                      |                  |                                                                                                      | /dev/mapper/c1-home | 11T   |
| Socket(s)           | 2                                                       |                  |                                                                                                      | tmpfs               | 26G   |
| NUMA node(s)        | 2                                                       |                  |                                                                                                      | /dev/sdb            | 11T   |
| Vendor ID           | GenuineIntel                                            |                  |                                                                                                      | /dev/loop0          | 6.5G  |
| CPU family          | 6                                                       |                  |                                                                                                      | tmpfs               | 26G   |
| Model               | 79                                                      |                  |                                                                                                      |                     |       |
| Model name          | Intel(R) Xeon(R) CPU E5-2630 v4 @ 2.20GHz               | Operation System |                                                                                                      |                     |       |
| Stepping            | 1                                                       | Parameters       | Value                                                                                                |                     |       |
| CPU MHz             | 1205.187                                                | Version          | CentOS Linux release 7.3.1611 (Core)                                                                 |                     |       |
| BogoMIPS            | 4404.40                                                 | Kernel           | Linux bio5 3.10.0-693.3.3.el7.x86_64 SMP Tue Sep 12 22:26:13 UTC 2017 x86_64 x86_64 x86_64 GNU/Linux |                     |       |
| Virtualization      | VT-x                                                    |                  |                                                                                                      |                     |       |
| L1d cache           | 32K                                                     |                  |                                                                                                      |                     |       |
| L1i cache           | 32K                                                     |                  |                                                                                                      |                     |       |
| L2 cache            | 256K                                                    |                  |                                                                                                      |                     |       |
| L3 cache            | 25600K                                                  |                  |                                                                                                      |                     |       |
| NUMA node0 CPU(s)   | 0,2,4,6,8,10,12,14,16,18,20,22,24,26,,28,30,32,34,36,38 |                  |                                                                                                      |                     |       |
| NUMA node1 CPU(s)   | 1,3,5,7,9,11,13,15,17,19,21,23,25,27,29,31,33,35,37,39  |                  |                                                                                                      |                     |       |

Fig. S21. Hardware Configuration.

### 3.3 Evaluation metrics

In order to comprehensively evaluate the performance of the compared methods, we used 13 evaluation metrics in this experiment, which are Num, Max(kb), N50(kb), N75(kb), N90(kb), 0 times, 1 times, >1 times, Mapping Rate(%), Reference(%), Repbase(%), Time (hour) and Memory(MB). 'Num' denotes the number of segments; 'Max(kb)' denotes the length of the largest segment; 'N50(kb)' is the length of the longest segment such that all the segments longer than this segment cover at least half (50%) of the total length of all segments; 'N75' and 'N90' are calculated in a similar way; '0 times' indicates the proportion of segments that cannot be aligned to the reference sequence in all segments; '1 times' indicates the proportion of segments that can be aligned to a unique location on the reference sequence in all segments; '>1 times' indicates the proportion of segments that can be aligned to multiple locations on the reference sequence in all segments; 'Mapping Rate(%)' indicates the proportion of segments that can be aligned to the reference sequence in all segments; 'Reference(%)' indicates the proportion of regions marked as repetitive regions in the reference sequence that can be covered with the segments; 'Repbase(%)' indicates the proportion of fragments in Repbase that can be covered with segments; 'Time (hour)' indicates the time consumption of algorithms; 'Memory(MB)' indicates the peak memory consumption of algorithms. Evaluation metrics are shown in Table S12.

**Table S12. Evaluation metrics**

| Metrics         | Meaning                                                                                                                                      |
|-----------------|----------------------------------------------------------------------------------------------------------------------------------------------|
| Num             | The number of segment                                                                                                                        |
| Max(kb)         | The length of the largest segment                                                                                                            |
| N50(kb)         | The length of the longest segment such that all the segments longer than this segment cover at least 50% of the total length of all segments |
| N75(kb)         | The length of the longest segment such that all the segments longer than this segment cover at least 75% of the total length of all segments |
| N90(kb)         | The length of the longest segment such that all the segments longer than this segment cover at least 90% of the total length of all segments |
| 0 times         | The proportion of segments that cannot be aligned to the reference sequence in all segments                                                  |
| 1 times         | The proportion of segments that can be aligned to a unique location on the reference sequence in all segments                                |
| > 1 times       | The proportion of segments that can be aligned to multiple locations on the reference sequence in all segments                               |
| Mapping Rate(%) | The proportion of segments that can be aligned to the reference sequence in all segments                                                     |
| Repbase(%)      | The proportion of fragments in Repbase that can be covered with segments                                                                     |
| Reference(%)    | The proportion of regions marked as repetitive regions in the reference sequence that can be covered with the segments                       |
| Time (hour)     | The time consumption of algorithms                                                                                                           |
| Memory(MB)      | The peak memory consumption of algorithms                                                                                                    |

### 3.4 Details of the experimental data

We evaluated the performance of five detection modes (Reference-assisted mode, *de novo* mode based on only NGS short reads, *de novo* mode based on the NGS short reads + barcode linked reads, *de novo* mode based on the NGS short reads + SMS long reads and *de novo* mode based on only SMS long reads) of LongRepMarker on 21 kinds of real sequencing data which include the reference genomes of 6 species, NGS sequencing data of 5 samples, NGS data of 3 samples and corresponding barcode linked data, NGS data of 3 samples and corresponding SMS data and SMS data of 4 samples. The details of these 21 kinds of data are shown in the Table S13.

**Table S13. Details of the experimental data**

| Test items           | Species                        | Dataset Name                                                                     | Datasize (KB)                                                                    | Source                                                                                                    |                                                                                                           |
|----------------------|--------------------------------|----------------------------------------------------------------------------------|----------------------------------------------------------------------------------|-----------------------------------------------------------------------------------------------------------|-----------------------------------------------------------------------------------------------------------|
| Reference mode       | Leafcutter Ant                 | GCA_000204515.1_Aech_3.9<br>_genomic_Ant.fna                                     | 293,052                                                                          | <a href="https://www.ncbi.nlm.nih.gov/">https://www.ncbi.nlm.nih.gov/</a>                                 |                                                                                                           |
|                      | D.melanogaster                 | dmel-all-chromosome-r5.43.fasta                                                  | 168,080                                                                          | <a href="https://www.ncbi.nlm.nih.gov/">https://www.ncbi.nlm.nih.gov/</a>                                 |                                                                                                           |
|                      | Soybean                        | Glycine_max_Soybean.fna                                                          | 968,211                                                                          | <a href="https://www.ncbi.nlm.nih.gov/">https://www.ncbi.nlm.nih.gov/</a>                                 |                                                                                                           |
|                      | Gallus                         | Gallus_gallus.fna                                                                | 1,053,454                                                                        | <a href="https://www.ncbi.nlm.nih.gov/">https://www.ncbi.nlm.nih.gov/</a>                                 |                                                                                                           |
|                      | Mouse                          | GCA_000001635.8_GRCm38.p6<br>_genomic_Mouse.fna                                  | 2,787,341                                                                        | <a href="https://www.ncbi.nlm.nih.gov/">https://www.ncbi.nlm.nih.gov/</a>                                 |                                                                                                           |
|                      | Human(hg38)                    | GCF_000001405.39_genomic<br>_Human.fna                                           | 3,196,759                                                                        | <a href="https://www.ncbi.nlm.nih.gov/">https://www.ncbi.nlm.nih.gov/</a>                                 |                                                                                                           |
| NGS only mode        | Leafcutter Ant                 | ERR034186_1.fastq<br>ERR034186_2.fastq                                           | 17,580,863<br>17,580,863                                                         | <a href="https://www.ncbi.nlm.nih.gov/">https://www.ncbi.nlm.nih.gov/</a>                                 |                                                                                                           |
|                      | D.melanogaster                 | SRR350908_1.fastq<br>SRR350908_2.fastq                                           | 5,767,698<br>5,767,698                                                           | <a href="https://www.ncbi.nlm.nih.gov/">https://www.ncbi.nlm.nih.gov/</a>                                 |                                                                                                           |
|                      | Mouse                          | ERR2894257_1.fastq<br>ERR2894257_2.fastq                                         | 26,655,537<br>26,655,537                                                         | <a href="https://www.ncbi.nlm.nih.gov/">https://www.ncbi.nlm.nih.gov/</a>                                 |                                                                                                           |
|                      | Human-chr14                    | frag_1.fastq<br>frag_2.fastq                                                     | 4,913,897<br>4,913,897                                                           | <a href="http://gage.cbcb.umd.edu/">http://gage.cbcb.umd.edu/</a>                                         |                                                                                                           |
|                      | HG003_24149_father             | D2_S2.L001.R1.001.fastq<br>D2_S2.L001.R2.001.fastq                               | 23,534,426<br>23,534,426                                                         | <a href="ftp://ftp-trace.ncbi.nlm.nih.gov/abi/ftp/data">ftp://ftp-trace.ncbi.nlm.nih.gov/abi/ftp/data</a> |                                                                                                           |
|                      | NGS+linked mode                | HG003_24149_father                                                               | D2_S2.L001.R1.001.fastq<br>D2_S2.L001.R2.001.fastq<br>10Xgenomics_ChromiumGenome | 23,544,498<br>23,534,426<br>83,701,326,271                                                                | <a href="ftp://ftp-trace.ncbi.nlm.nih.gov/abi/ftp/data">ftp://ftp-trace.ncbi.nlm.nih.gov/abi/ftp/data</a> |
| HG004_NA24143_mother |                                | D3_S3.L001.R1.001.fastq<br>D3_S3.L001.R2.001.fastq<br>10Xgenomics_ChromiumGenome | 20,115,293<br>20,106,259<br>83,701,326,271                                       | <a href="ftp://ftp-trace.ncbi.nlm.nih.gov/abi/ftp/data">ftp://ftp-trace.ncbi.nlm.nih.gov/abi/ftp/data</a> |                                                                                                           |
| HG002_NA24385_son    |                                | D1_S1.L001.R1.001.fastq<br>D1_S1.L001.R2.001.fastq<br>10Xgenomics_ChromiumGenome | 18,307,018<br>18,315,730<br>172,283,140,716                                      | <a href="ftp://ftp-trace.ncbi.nlm.nih.gov/abi/ftp/data">ftp://ftp-trace.ncbi.nlm.nih.gov/abi/ftp/data</a> |                                                                                                           |
| NGS+SMS mode         |                                | HG003_24149_father                                                               | D2_S2.L001.R1.001.fastq<br>D2_S2.L001.R2.001.fastq<br>m64017_191110_150028.fastq | 23,544,498<br>23,534,426<br>38,082,258                                                                    | <a href="ftp://ftp-trace.ncbi.nlm.nih.gov/abi/ftp/data">ftp://ftp-trace.ncbi.nlm.nih.gov/abi/ftp/data</a> |
|                      |                                | HG004_NA24143_mother                                                             | D3_S3.L001.R1.001.fastq<br>D3_S3.L001.R2.001.fastq<br>m64017_191113_230503.fastq | 20,115,293<br>20,106,259<br>43,819,465                                                                    | <a href="ftp://ftp-trace.ncbi.nlm.nih.gov/abi/ftp/data">ftp://ftp-trace.ncbi.nlm.nih.gov/abi/ftp/data</a> |
|                      |                                | HG002_NA24385_son                                                                | D1_S1.L001.R1.001.fastq<br>D1_S1.L001.R2.001.fastq                               | 18,307,018<br>18,315,730                                                                                  | <a href="ftp://ftp-trace.ncbi.nlm.nih.gov/abi/ftp/data">ftp://ftp-trace.ncbi.nlm.nih.gov/abi/ftp/data</a> |
|                      | m54316_180630_153952.Q20.fastq |                                                                                  | 5,285,851                                                                        | <a href="ftp://ftp-trace.ncbi.nlm.nih.gov/abi/ftp/data">ftp://ftp-trace.ncbi.nlm.nih.gov/abi/ftp/data</a> |                                                                                                           |
| SMS only mode        | D.melanogaster                 | dro_100k.fa                                                                      | 919,162                                                                          | <a href="https://github.com/ruiguo-bio/replong">https://github.com/ruiguo-bio/replong</a>                 |                                                                                                           |
|                      | Human                          | human_100k.fa                                                                    | 507,871                                                                          | <a href="https://github.com/ruiguo-bio/replong">https://github.com/ruiguo-bio/replong</a>                 |                                                                                                           |
|                      | D.melanogaster                 | dmel_filtered.fastq                                                              | 30,885,716                                                                       | <a href="https://github.com/ruiguo-bio/replong">https://github.com/ruiguo-bio/replong</a>                 |                                                                                                           |
|                      | Human                          | human_polished.fastq                                                             | 109,716,724                                                                      | <a href="https://github.com/ruiguo-bio/replong">https://github.com/ruiguo-bio/replong</a>                 |                                                                                                           |

'Reference mode' represents the Reference-assisted mode; 'NGS only mode' represents the *de novo* mode based on only NGS short reads; 'NGS+linked mode' represents the *de novo* mode based on the NGS short reads + barcode linked reads; 'NGS+SMS mode' represents the *de novo* mode based on the NGS short reads + SMS long reads; 'SMS only mode' represents the *de novo* mode based on only SMS long reads.

### 3.5 Detailed test results

#### 3.5.1 Detection results of reference-assisted mode

We evaluated the performance of LongRepMarker in the reference-assisted mode on six eukaryote genomes (Table S13). The genome size of these six species are 3.196Gb (*H.sapiens(hg38)*), 2.752Gb (*Mouse*), 289Mb (*Leafcutter Ant*), 168Mb (*D.melanogaster*), 956Mb (*soybean*) and 1.040Gb (*Gallus*). The results are shown in Figs. S22-S23 and Tables S14-S26. We compared the reference-assisted mode of LongRepMarker with RepeatMasker (Table S14), RepeatScout and RepeatModeler2.

Since the RepeatMasker can only be used to mask the repeats in the genome, it cannot classify the masked repeats in detail, so we can only compare the performance of LongRepMarker with RepeatMasker by detecting the size and alignment rate of detected fragments, just as the shown in Table S14. As can be seen from Table S14, LongRepMarker is superior to RepeatMasker in terms of running time, memory consumption, fragment size and alignment rate. In order to further analyze the difference between the detection results of those two tools, we carried out two comparative experiments, and the results are shown in the Tables S61 and S62 of Section 3.8. Comparative experiments show that LongRepMarker can find some new repetitive sequence types which cannot be found by RepeatMasker.

Comparison of the detection results of LongRepMarker with that of RepeatScout and RepeatModeler2 is shown in Fig. S22 and Tables S15-S26. In Fig. S22, the X-axis represents the length distribution of the detected fragments and Y-axis represents the repetition frequency of the detected fragments in the genome, and the three images in each row respectively represent the frequency and length distribution of the repeated sequences detected by the LongRepMaker, RepeatScout, and RepeatModeler2 in a certain species. The coordinates of the Y-axis are divided into left and right displays, where the low frequency on the left is represented by purple, and the high frequency on the right is represented by green. As can be seen from Fig. S22, the repetition frequency and length distribution of the fragments detected by LongRepMarker have significant advantages over the latter two tools. Tables S15-S26 show the proportion and detailed classification of the detection results generated from the three tools on six species covering the corresponding RepBase library and reference genome. From the perspective of the coverage of the total base ratio, LongRepMarker has certain advantages compared with the latter two tools.

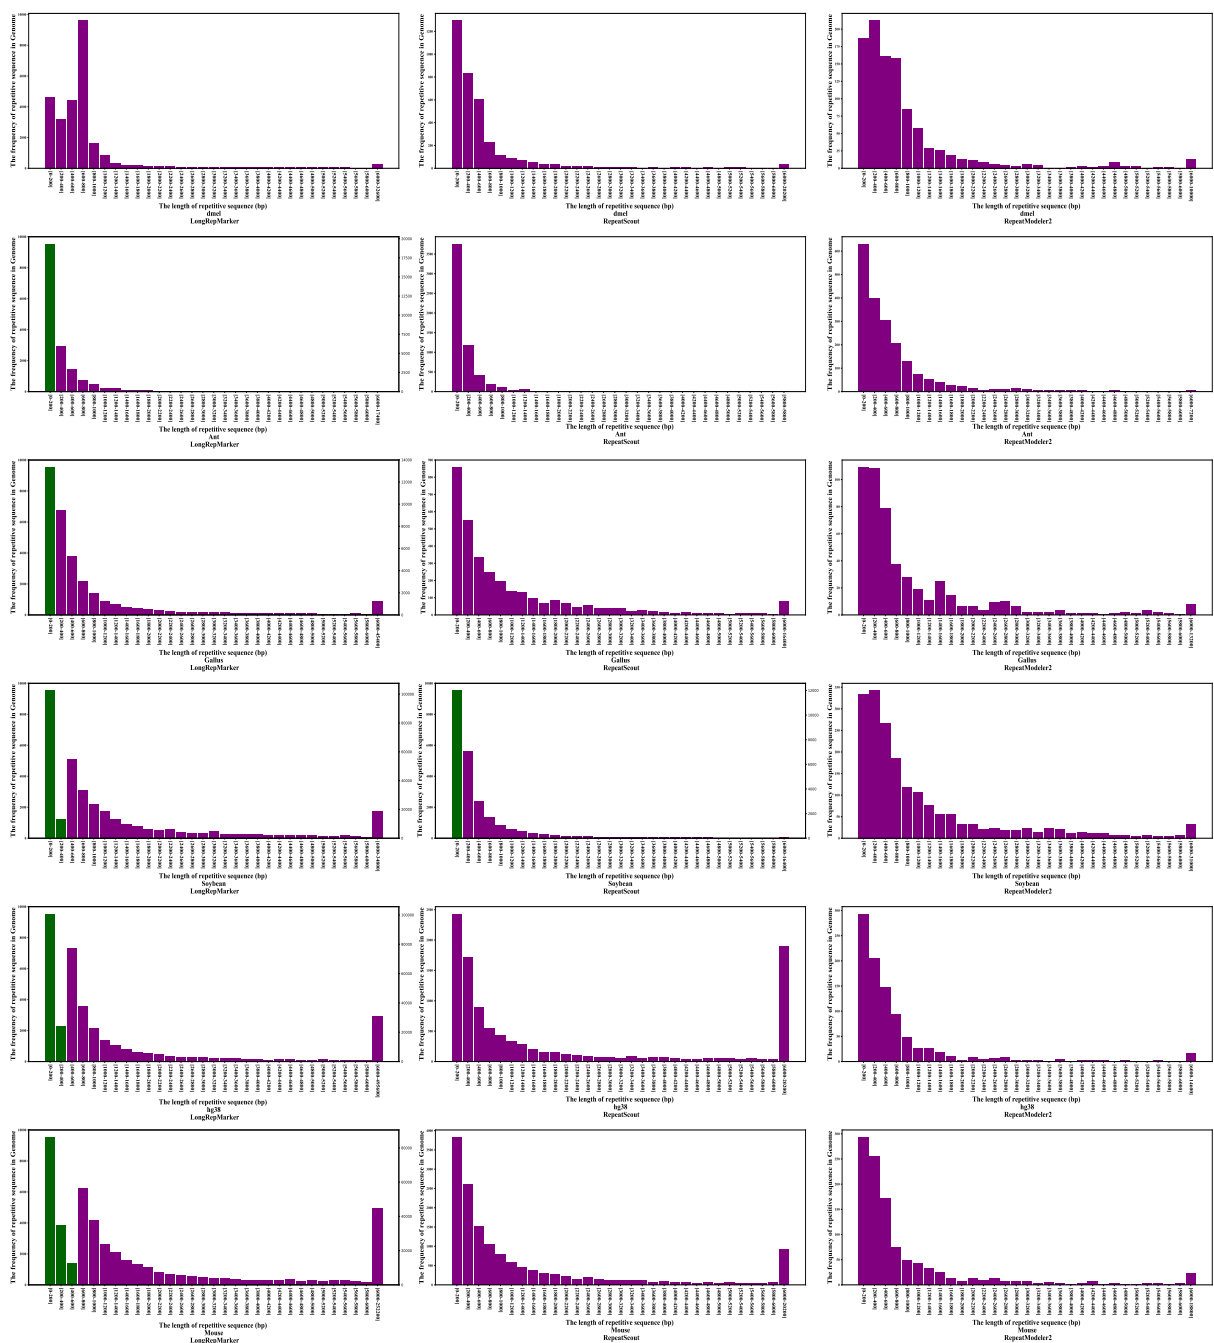

**Fig. S22.** Comparison of the repetition frequency and length distribution of the detected fragments generated from three tools. The X-axis represents the length distribution of the detected fragments and Y-axis represents the repetition frequency of the detected fragments in the genome, and the three images in each row respectively represent the frequency and length distribution of the repeated sequences detected by the three tools in a certain species. The coordinates of the Y-axis are divided into left and right displays, where the low frequency on the left is represented by purple, and the high frequency on the right is represented by green.

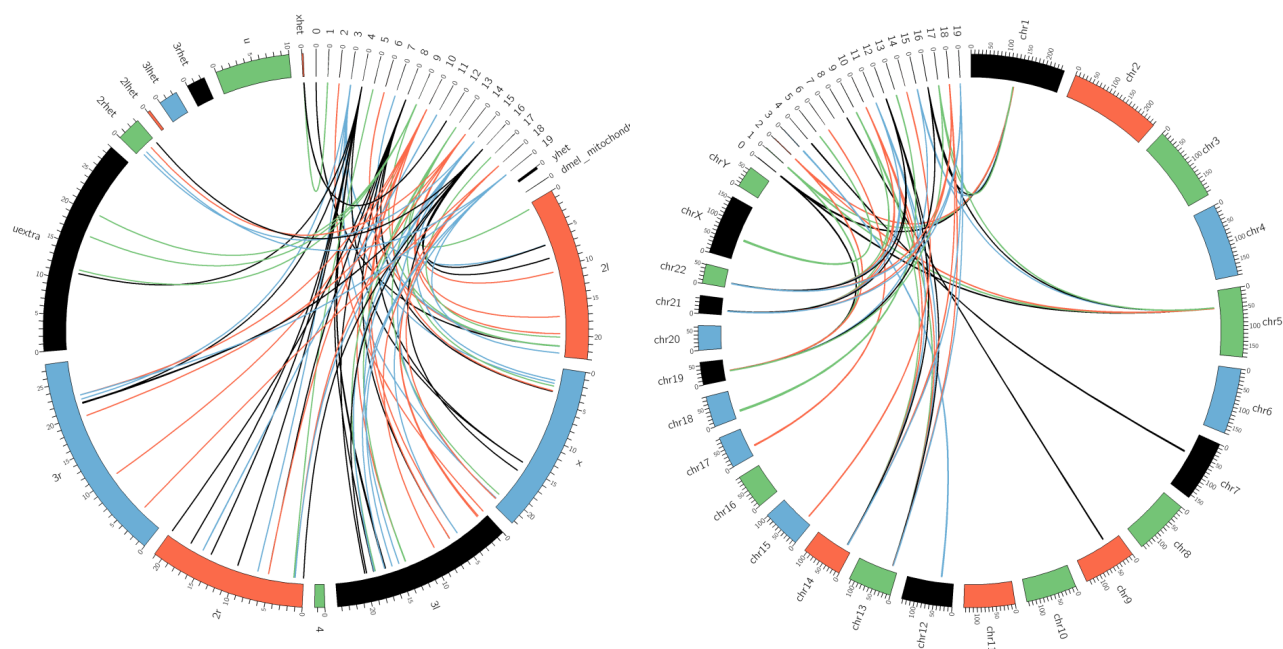

**Fig. S23.** The sub-figure on the left shows the alignment between the reference genome of *Drosophila* and 20 repetitive fragments randomly selected from the detection results of the *Drosophila* dataset which generated from the reference-assisted mode of LongRepMarker. The sub-figure on the right shows the alignment between the reference genome of Human(hg38) and 20 repetitive fragments randomly selected from the detection results of the Human dataset which generated from the reference-assisted mode of LongRepMarker.

**Table S14.** Comparison of the detection results generated by LongRepMarker in the reference-assisted mode and RepeatMasker.

| Species         | Tool          | Time(min)/Peak Mem(GB) | Quast (length $\geq$ 5000bp) |          |          | Minimap2 |        |        |         |                  |
|-----------------|---------------|------------------------|------------------------------|----------|----------|----------|--------|--------|---------|------------------|
|                 |               |                        | Max (kb)                     | N50 (kb) | N75 (kb) | N90 (kb) | 0 time | 1 time | >1 time | Mapping Rate (%) |
| H.sapiens(hg38) | LongRepMarker | 2863.539/46.688        | 1034.338                     | 83.195   | 28.812   | 10.281   | 0.00%  | 11.75% | 88.25%  | 100.0%           |
|                 | RepeatMasker  | 12696.500/71.808       | 1499.996                     | 7.228    | 6.133    | 5.616    | 0.00%  | 92.63% | 7.37%   | 100.0%           |
| Mouse           | LongRepMarker | 2979.584/42.868        | 339.188                      | 16.526   | 7.112    | 6.061    | 0.00%  | 24.49% | 75.51%  | 100.0%           |
|                 | RepeatMasker  | 11734.183/65.234       | 78.144                       | 6.409    | 6.092    | 5.391    | 0.01%  | 82.61% | 17.39%  | 99.99%           |

The middle sub-table shows the size statistics of detection results. The right sub-table shows the alignment of repetitive fragments in reference genome. The main evaluation indicators are introduced in Table S12.

**Table S15.** Comparison of the proportion and detailed classification of detection results generated by three tools on *Drosophila* dataset covering the corresponding RepBase library.

| LongRepMarker                     |                    |                 |                        | RepeatScout                       |                 |                        | RepeatModeler2                    |                 |                        |
|-----------------------------------|--------------------|-----------------|------------------------|-----------------------------------|-----------------|------------------------|-----------------------------------|-----------------|------------------------|
| sequence: 2489                    |                    |                 |                        | sequence: 2489                    |                 |                        | sequence: 2489                    |                 |                        |
| total length: 7220516bp           |                    |                 |                        | total length: 7220516bp           |                 |                        | total length: 7220516bp           |                 |                        |
| GC level: 42.77%                  |                    |                 |                        | GC level: 42.77%                  |                 |                        | GC level: 42.77%                  |                 |                        |
| bases masked: 3746452 bp (51.89%) |                    |                 |                        | bases masked: 3491131 bp (48.35%) |                 |                        | bases masked: 3336440 bp (46.21%) |                 |                        |
| Repeat Types                      | Number of elements | Length occupied | Percentage of sequence | Number of elements                | Length occupied | Percentage of sequence | Number of elements                | Length occupied | Percentage of sequence |
| SINEs:                            | 1                  | 73 bp           | 0.00%                  | 1                                 | 74 bp           | 0.00%                  | 0                                 | 0 bp            | 0.00%                  |
| -ALUs:                            | 0                  | 0 bp            | 0.00%                  | 0                                 | 0 bp            | 0.00%                  | 0                                 | 0 bp            | 0.00%                  |
| -MIRs:                            | 0                  | 0 bp            | 0.00%                  | 0                                 | 0 bp            | 0.00%                  | 0                                 | 0 bp            | 0.00%                  |
| LINEs:                            | 1317               | 1043230 bp      | 14.45%                 | 1187                              | 949761 bp       | 13.15%                 | 1152                              | 955570 bp       | 13.23%                 |
| -LINE1:                           | 0                  | 0 bp            | 0.00%                  | 0                                 | 0 bp            | 0.00%                  | 0                                 | 0 bp            | 0.00%                  |
| -LINE2:                           | 0                  | 0 bp            | 0.00%                  | 0                                 | 0 bp            | 0.00%                  | 0                                 | 0 bp            | 0.00%                  |
| -L3/CR1:                          | 202                | 143230 bp       | 1.98%                  | 147                               | 106999 bp       | 1.48%                  | 108                               | 104755 bp       | 1.45%                  |
| LTR elements:                     | 2515               | 2355715 bp      | 32.63%                 | 2631                              | 2194498 bp      | 30.39%                 | 2254                              | 2065761 bp      | 28.61%                 |
| -ERV1:                            | 0                  | 0 bp            | 0.00%                  | 0                                 | 0 bp            | 0.00%                  | 0                                 | 0 bp            | 0.00%                  |
| -ERV1-MaLRs                       | 0                  | 0 bp            | 0.00%                  | 0                                 | 0 bp            | 0.00%                  | 0                                 | 0 bp            | 0.00%                  |
| -ERV_classI                       | 0                  | 0 bp            | 0.00%                  | 0                                 | 0 bp            | 0.00%                  | 0                                 | 0 bp            | 0.00%                  |
| -ERV_classII                      | 0                  | 0 bp            | 0.00%                  | 0                                 | 0 bp            | 0.00%                  | 0                                 | 0 bp            | 0.00%                  |
| DNA transposon elements:          | 421                | 193452 bp       | 2.68%                  | 524                               | 177269 bp       | 2.46%                  | 409                               | 170180 bp       | 2.36%                  |
| -hAT-Charlie:                     | 0                  | 0 bp            | 0.00%                  | 0                                 | 0 bp            | 0.00%                  | 0                                 | 0 bp            | 0.00%                  |
| -TcMar-Tigger:                    | 0                  | 0 bp            | 0.00%                  | 0                                 | 0 bp            | 0.00%                  | 0                                 | 0 bp            | 0.00%                  |
| Unclassified:                     | 166                | 53666 bp        | 0.74%                  | 179                               | 59066 bp        | 0.82%                  | 139                               | 32370 bp        | 0.45%                  |
| Total interspersed repeats:       |                    | 3646136 bp      | 50.50%                 |                                   | 3380668 bp      | 46.82%                 |                                   | 3223881 bp      | 44.65%                 |
| Small RNA:                        | 29                 | 13271 bp        | 0.18%                  | 27                                | 13792 bp        | 0.19%                  | 15                                | 6003 bp         | 0.08%                  |
| Satellites:                       | 17                 | 6719 bp         | 0.09%                  | 15                                | 6065 bp         | 0.08%                  | 4                                 | 544 bp          | 0.03%                  |
| Simple repeats:                   | 1108               | 74336 bp        | 1.03%                  | 1172                              | 76644 bp        | 1.06%                  | 1224                              | 80026 bp        | 1.11%                  |
| Low complexity:                   | 291                | 15714 bp        | 0.22%                  | 295                               | 16084 bp        | 0.22%                  | 318                               | 17088 bp        | 0.24%                  |

**Table S16.** Comparison of the proportion and detailed classification of detection results generated by three tools on Ant dataset covering the corresponding RepBase library.

| LongRepMarker                    |                    |                 |                        | RepeatScout                      |                 |                        | RepeatModeler2                   |                 |                        |
|----------------------------------|--------------------|-----------------|------------------------|----------------------------------|-----------------|------------------------|----------------------------------|-----------------|------------------------|
| sequence: 254                    |                    |                 |                        | sequence: 254                    |                 |                        | sequence: 254                    |                 |                        |
| total length: 214457bp           |                    |                 |                        | total length: 214457bp           |                 |                        | total length: 214457bp           |                 |                        |
| GC level: 45.07%                 |                    |                 |                        | GC level: 45.07%                 |                 |                        | GC level: 45.07%                 |                 |                        |
| bases masked: 168915 bp (78.76%) |                    |                 |                        | bases masked: 173383 bp (80.85%) |                 |                        | bases masked: 169070 bp (78.84%) |                 |                        |
| Repeat Types                     | Number of elements | Length occupied | Percentage of sequence | Number of elements               | Length occupied | Percentage of sequence | Number of elements               | Length occupied | Percentage of sequence |
| SINEs:                           | 1                  | 69 bp           | 0.03%                  | 0                                | 0 bp            | 0.00%                  | 0                                | 0 bp            | 0.00%                  |
| -ALUs:                           | 0                  | 0 bp            | 0.00%                  | 0                                | 0 bp            | 0.00%                  | 0                                | 0 bp            | 0.00%                  |
| -MIRs:                           | 0                  | 0 bp            | 0.00%                  | 0                                | 0 bp            | 0.00%                  | 0                                | 0 bp            | 0.00%                  |
| LINEs:                           | 19                 | 8223 bp         | 3.83%                  | 29                               | 12137 bp        | 5.66%                  | 16                               | 13379 bp        | 6.24%                  |
| -LINE1:                          | 0                  | 0 bp            | 0.00%                  | 0                                | 0 bp            | 0.00%                  | 0                                | 0 bp            | 0.00%                  |
| -LINE2:                          | 0                  | 0 bp            | 0.00%                  | 0                                | 0 bp            | 0.00%                  | 0                                | 0 bp            | 0.00%                  |
| -L3/CR1:                         | 0                  | 0 bp            | 0.00%                  | 0                                | 0 bp            | 0.00%                  | 0                                | 0 bp            | 0.00%                  |
| LTR elements:                    | 71                 | 48344 bp        | 22.54%                 | 43                               | 49839 bp        | 23.24%                 | 38                               | 48684 bp        | 22.70%                 |
| -ERV1:                           | 0                  | 0 bp            | 0.00%                  | 0                                | 0 bp            | 0.00%                  | 0                                | 0 bp            | 0.00%                  |
| -ERV1-MaLRs                      | 0                  | 0 bp            | 0.00%                  | 0                                | 0 bp            | 0.00%                  | 0                                | 0 bp            | 0.00%                  |
| -ERV_classI                      | 0                  | 0 bp            | 0.00%                  | 0                                | 0 bp            | 0.00%                  | 0                                | 0 bp            | 0.00%                  |
| -ERV_classII                     | 0                  | 0 bp            | 0.00%                  | 0                                | 0 bp            | 0.00%                  | 0                                | 0 bp            | 0.00%                  |
| DNA transposon elements:         | 95                 | 71724 bp        | 33.44%                 | 111                              | 72618 bp        | 33.86%                 | 116                              | 69591 bp        | 32.45%                 |
| -hAT-Charlie:                    | 0                  | 0 bp            | 0.00%                  | 0                                | 0 bp            | 0.00%                  | 0                                | 0 bp            | 0.00%                  |
| -TcMar-Tigger:                   | 0                  | 0 bp            | 0.00%                  | 0                                | 0 bp            | 0.00%                  | 0                                | 0 bp            | 0.00%                  |
| Unclassified:                    | 39                 | 9733 bp         | 4.54%                  | 34                               | 7607 bp         | 3.55%                  | 13                               | 7330 bp         | 3.42%                  |
| Total interspersed repeats:      |                    | 138093 bp       | 64.39%                 |                                  | 142201 bp       | 66.31%                 |                                  | 138984 bp       | 64.81%                 |
| Small RNA:                       | 6                  | 566 bp          | 0.26%                  | 7                                | 746 bp          | 0.35%                  | 0                                | 0 bp            | 0.00%                  |
| Satellites:                      | 0                  | 0 bp            | 0.00%                  | 0                                | 0 bp            | 0.00%                  | 0                                | 0 bp            | 0.00%                  |
| Simple repeats:                  | 184                | 30485 bp        | 14.21%                 | 184                              | 30449 bp        | 14.20%                 | 181                              | 30285 bp        | 14.12%                 |
| Low complexity:                  | 2                  | 110 bp          | 0.05%                  | 2                                | 110 bp          | 0.05%                  | 2                                | 110 bp          | 0.05%                  |



Table S17. Comparison of the proportion and detailed classification of detection results generated by three tools on Gallus dataset covering the corresponding RepBase library.

| LongRepMarker                    |                    |                 |                        | RepeatScout                      |                 |                        | RepeatModeler2                   |                 |                        |
|----------------------------------|--------------------|-----------------|------------------------|----------------------------------|-----------------|------------------------|----------------------------------|-----------------|------------------------|
| sequence: 512                    |                    |                 |                        | sequence: 512                    |                 |                        | sequence: 512                    |                 |                        |
| total length: 362626bp           |                    |                 |                        | total length: 362626bp           |                 |                        | total length: 362626bp           |                 |                        |
| GC level: 49.51%                 |                    |                 |                        | GC level: 49.51%                 |                 |                        | GC level: 49.51%                 |                 |                        |
| bases masked: 255267 bp (70.39%) |                    |                 |                        | bases masked: 246110 bp (67.87%) |                 |                        | bases masked: 225717 bp (62.25%) |                 |                        |
| Repeat Types                     | Number of elements | Length occupied | Percentage of sequence | Number of elements               | Length occupied | Percentage of sequence | Number of elements               | Length occupied | Percentage of sequence |
| SINEs:                           | 9                  | 784 bp          | 0.22%                  | 15                               | 1292 bp         | 0.36%                  | 13                               | 1935 bp         | 0.53%                  |
| -ALUs:                           | 0                  | 0 bp            | 0.00%                  | 0                                | 0 bp            | 0.00%                  | 0                                | 0 bp            | 0.00%                  |
| -MIRs:                           | 0                  | 0 bp            | 0.00%                  | 0                                | 0 bp            | 0.00%                  | 5                                | 839 bp          | 0.23%                  |
| LINEs:                           | 163                | 119330 bp       | 32.91%                 | 94                               | 100795 bp       | 27.80%                 | 84                               | 88718 bp        | 24.47%                 |
| -LINE1:                          | 0                  | 0 bp            | 0.00%                  | 0                                | 0 bp            | 0.00%                  | 0                                | 0 bp            | 0.00%                  |
| -LINE2:                          | 0                  | 0 bp            | 0.00%                  | 0                                | 0 bp            | 0.00%                  | 0                                | 0 bp            | 0.00%                  |
| -L3/CR1:                         | 163                | 119330 bp       | 32.91%                 | 94                               | 100795 bp       | 27.80%                 | 84                               | 88718 bp        | 24.47%                 |
| LTR elements:                    | 68                 | 78553 bp        | 21.94%                 | 107                              | 99403 bp        | 27.41%                 | 109                              | 85021 bp        | 23.45%                 |
| -ERV                             | 40                 | 45157 bp        | 12.45%                 | 55                               | 52791 bp        | 14.56%                 | 69                               | 54457 bp        | 15.02%                 |
| -ERV <sub>L</sub> -MaLRs         | 0                  | 0 bp            | 0.00%                  | 0                                | 0 bp            | 0.00%                  | 0                                | 0 bp            | 0.00%                  |
| -ERV <sub>classI</sub>           | 7                  | 9997 bp         | 2.76%                  | 14                               | 11837 bp        | 3.26%                  | 16                               | 14306 bp        | 3.95%                  |
| -ERV <sub>classII</sub>          | 20                 | 23453 bp        | 6.47%                  | 38                               | 34775 bp        | 9.59%                  | 24                               | 16258 bp        | 4.48%                  |
| DNA transposon elements:         | 18                 | 3974 bp         | 1.10%                  | 21                               | 7645 bp         | 2.11%                  | 35                               | 11014 bp        | 3.04%                  |
| -hAT-Charlie:                    | 2                  | 346 bp          | 0.10%                  | 7                                | 2249 bp         | 0.62%                  | 5                                | 4653 bp         | 1.28%                  |
| -TcMar-Tigger:                   | 0                  | 0 bp            | 0.00%                  | 0                                | 0 bp            | 0.00%                  | 0                                | 0 bp            | 0.00%                  |
| Unclassified:                    | 8                  | 8430 bp         | 2.32%                  | 2                                | 397 bp          | 0.11%                  | 5                                | 652 bp          | 0.18%                  |
| Total interspersed repeats:      |                    | 212071 bp       | 58.48%                 |                                  | 209532 bp       | 57.78%                 |                                  | 187340 bp       | 51.66%                 |
| Small RNA:                       | 39                 | 6135 bp         | 1.69%                  | 46                               | 4770 bp         | 1.32%                  | 2                                | 380 bp          | 0.10%                  |
| Satellites:                      | 5                  | 5709 bp         | 1.57%                  | 3                                | 583 bp          | 0.16%                  | 7                                | 6199 bp         | 1.71%                  |
| Simple repeats:                  | 197                | 31810 bp        | 8.77%                  | 198                              | 31808 bp        | 8.77%                  | 200                              | 32031 bp        | 8.83%                  |
| Low complexity:                  | 3                  | 147 bp          | 0.04%                  | 3                                | 147 bp          | 0.04%                  | 3                                | 147 bp          | 0.04%                  |

Table S18. Comparison of the proportion and detailed classification of detection results generated by three tools on Soybean dataset covering the corresponding RepBase library.

| LongRepMarker                     |                    |                 |                        | RepeatScout                       |                 |                        | RepeatModeler2                    |                 |                        |
|-----------------------------------|--------------------|-----------------|------------------------|-----------------------------------|-----------------|------------------------|-----------------------------------|-----------------|------------------------|
| sequence: 758                     |                    |                 |                        | sequence: 758                     |                 |                        | sequence: 758                     |                 |                        |
| total length: 1646292bp           |                    |                 |                        | total length: 1646292bp           |                 |                        | total length: 1646292bp           |                 |                        |
| GC level: 42.57%                  |                    |                 |                        | GC level: 42.57%                  |                 |                        | GC level: 42.57%                  |                 |                        |
| bases masked: 1536173 bp (93.31%) |                    |                 |                        | bases masked: 1535709 bp (93.28%) |                 |                        | bases masked: 1375693 bp (83.56%) |                 |                        |
| Repeat Types                      | Number of elements | Length occupied | Percentage of sequence | Number of elements                | Length occupied | Percentage of sequence | Number of elements                | Length occupied | Percentage of sequence |
| SINEs:                            | 1                  | 18 bp           | 0.00%                  | 0                                 | 0 bp            | 0.00%                  | 2                                 | 145 bp          | 0.01%                  |
| -ALUs:                            | 0                  | 0 bp            | 0.00%                  | 0                                 | 0 bp            | 0.00%                  | 0                                 | 0 bp            | 0.00%                  |
| -MIRs:                            | 0                  | 0 bp            | 0.00%                  | 0                                 | 0 bp            | 0.00%                  | 0                                 | 0 bp            | 0.00%                  |
| LINEs:                            | 45                 | 80754 bp        | 4.91%                  | 52                                | 85283 bp        | 5.18%                  | 67                                | 72838 bp        | 4.42%                  |
| -LINE1:                           | 44                 | 77578 bp        | 4.71%                  | 50                                | 81968 bp        | 4.98%                  | 65                                | 69502 bp        | 4.22%                  |
| -LINE2:                           | 0                  | 0 bp            | 0.00%                  | 0                                 | 0 bp            | 0.00%                  | 0                                 | 0 bp            | 0.00%                  |
| -L3/CR1:                          | 0                  | 0 bp            | 0.00%                  | 0                                 | 0 bp            | 0.00%                  | 0                                 | 0 bp            | 0.00%                  |
| LTR elements:                     | 881                | 1238562 bp      | 75.23%                 | 1030                              | 1238480 bp      | 75.23%                 | 815                               | 1114450 bp      | 67.69%                 |
| -ERV                              | 0                  | 0 bp            | 0.00%                  | 0                                 | 0 bp            | 0.00%                  | 0                                 | 0 bp            | 0.00%                  |
| -ERV <sub>L</sub> -MaLRs          | 0                  | 0 bp            | 0.00%                  | 0                                 | 0 bp            | 0.00%                  | 0                                 | 0 bp            | 0.00%                  |
| -ERV <sub>classI</sub>            | 0                  | 0 bp            | 0.00%                  | 0                                 | 0 bp            | 0.00%                  | 0                                 | 0 bp            | 0.00%                  |
| -ERV <sub>classII</sub>           | 0                  | 0 bp            | 0.00%                  | 0                                 | 0 bp            | 0.00%                  | 0                                 | 0 bp            | 0.00%                  |
| DNA transposon elements:          | 130                | 154184 bp       | 9.37%                  | 145                               | 146753 bp       | 8.91%                  | 139                               | 123780 bp       | 7.52%                  |
| -hAT-Charlie:                     | 0                  | 0 bp            | 0.00%                  | 0                                 | 0 bp            | 0.00%                  | 0                                 | 0 bp            | 0.00%                  |
| -TcMar-Tigger:                    | 0                  | 0 bp            | 0.00%                  | 0                                 | 0 bp            | 0.00%                  | 0                                 | 0 bp            | 0.00%                  |
| Unclassified:                     | 28                 | 25065 bp        | 1.52%                  | 34                                | 31451 bp        | 1.91%                  | 20                                | 23872 bp        | 1.45%                  |
| Total interspersed repeats:       |                    | 1498583 bp      | 91.03%                 |                                   | 1501967 bp      | 91.23%                 |                                   | 1335085 bp      | 81.10%                 |
| Small RNA:                        | 22                 | 6625 bp         | 0.40%                  | 26                                | 6988 bp         | 0.42%                  | 2                                 | 5216 bp         | 0.32%                  |
| Satellites:                       | 0                  | 0 bp            | 0.00%                  | 0                                 | 0 bp            | 0.00%                  | 3                                 | 301 bp          | 0.02%                  |
| Simple repeats:                   | 200                | 31493 bp        | 1.91%                  | 215                               | 32310 bp        | 1.96%                  | 255                               | 33830 bp        | 2.05%                  |
| Low complexity:                   | 9                  | 1018 bp         | 0.06%                  | 11                                | 824 bp          | 0.05%                  | 21                                | 1344 bp         | 0.08%                  |

Table S19. Comparison of the proportion and detailed classification of detection results generated by three tools on Human(hg38) dataset covering the corresponding RepBase library.

| LongRepMarker                     |                    |                 |                        | RepeatScout                       |                 |                        | RepeatModeler2                    |                 |                        |
|-----------------------------------|--------------------|-----------------|------------------------|-----------------------------------|-----------------|------------------------|-----------------------------------|-----------------|------------------------|
| sequence: 1512                    |                    |                 |                        | sequence: 1512                    |                 |                        | sequence: 1512                    |                 |                        |
| total length: 1647075bp           |                    |                 |                        | total length: 1647075bp           |                 |                        | total length: 1647075bp           |                 |                        |
| GC level: 45.30%                  |                    |                 |                        | GC level: 45.30%                  |                 |                        | GC level: 45.30%                  |                 |                        |
| bases masked: 1213841 bp (82.45%) |                    |                 |                        | bases masked: 1213841 bp (73.70%) |                 |                        | bases masked: 1213841 bp (63.33%) |                 |                        |
| Repeat Types                      | Number of elements | Length occupied | Percentage of sequence | Number of elements                | Length occupied | Percentage of sequence | Number of elements                | Length occupied | Percentage of sequence |
| SINEs:                            | 709                | 255186 bp       | 15.49%                 | 690                               | 189225 bp       | 11.49%                 | 87                                | 26863 bp        | 1.63%                  |
| -ALUs:                            | 690                | 251356 bp       | 15.26%                 | 676                               | 188001 bp       | 11.41%                 | 74                                | 25030 bp        | 1.52%                  |
| -MIRs:                            | 17                 | 3552 bp         | 0.22%                  | 9                                 | 613 bp          | 0.04%                  | 10                                | 1566 bp         | 0.10%                  |
| LINEs:                            | 1376               | 690975 bp       | 41.95%                 | 624                               | 298720 bp       | 18.14%                 | 275                               | 254509 bp       | 15.45%                 |
| -LINE1:                           | 1337               | 682454 bp       | 41.43%                 | 608                               | 295084 bp       | 17.92%                 | 244                               | 242822 bp       | 14.74%                 |
| -LINE2:                           | 11                 | 1455 bp         | 0.09%                  | 9                                 | 2517 bp         | 0.15%                  | 9                                 | 5981 bp         | 0.36%                  |
| -L3/CR1:                          | 5                  | 708 bp          | 0.04%                  | 4                                 | 805 bp          | 0.05%                  | 18                                | 4208 bp         | 0.26%                  |
| LTR elements:                     | 566                | 327086 bp       | 19.86%                 | 903                               | 571647 bp       | 34.71%                 | 1011                              | 612530 bp       | 37.19%                 |
| -ERV                              | 98                 | 39268 bp        | 2.38%                  | 152                               | 87126 bp        | 5.29%                  | 188                               | 119764 bp       | 7.27%                  |
| -ERV <sub>L</sub> -MaLRs          | 32                 | 8118 bp         | 0.49%                  | 47                                | 13970 bp        | 0.85%                  | 47                                | 19783 bp        | 1.20%                  |
| -ERV <sub>classI</sub>            | 370                | 220447 bp       | 13.38%                 | 634                               | 388908 bp       | 23.61%                 | 709                               | 402655 bp       | 24.45%                 |
| -ERV <sub>classII</sub>           | 54                 | 57466 bp        | 3.49%                  | 56                                | 79131 bp        | 4.80%                  | 65                                | 69756 bp        | 4.24%                  |
| DNA transposon elements:          | 110                | 25838 bp        | 1.57%                  | 223                               | 64465 bp        | 3.91%                  | 344                               | 106865 bp       | 6.49%                  |
| -hAT-Charlie:                     | 41                 | 8781 bp         | 0.53%                  | 48                                | 11006 bp        | 0.67%                  | 102                               | 28766 bp        | 1.75%                  |
| -TcMar-Tigger:                    | 35                 | 11048 bp        | 0.67%                  | 84                                | 34543 bp        | 2.10%                  | 107                               | 36801 bp        | 2.23%                  |
| Unclassified:                     | 185                | 57213 bp        | 3.47%                  | 141                               | 54603 bp        | 3.32%                  | 8                                 | 2266 bp         | 0.14%                  |
| Total interspersed repeats:       |                    | 1356298 bp      | 82.35%                 |                                   | 1178660 bp      | 71.56%                 |                                   | 1003033 bp      | 60.90%                 |
| Small RNA:                        | 14                 | 1276 bp         | 0.08%                  | 51                                | 11176 bp        | 0.68%                  | 6                                 | 742 bp          | 0.05%                  |
| Satellites:                       | 24                 | 10205 bp        | 0.62%                  | 31                                | 12727 bp        | 0.77%                  | 14                                | 3414 bp         | 0.21%                  |
| Simple repeats:                   | 216                | 31821 bp        | 1.93%                  | 255                               | 34087 bp        | 2.07%                  | 279                               | 34727 bp        | 2.11%                  |
| Low complexity:                   | 11                 | 483 bp          | 0.03%                  | 18                                | 851 bp          | 0.05%                  | 27                                | 1228 bp         | 0.07%                  |

Table S20. Comparison of the proportion and detailed classification of detection results generated by three tools on Mouse dataset covering the corresponding RepBase library.

| LongRepMarker                     |                    |                 |                        | RepeatScout                      |                 |                        | RepeatModeler2                   |                 |                        |
|-----------------------------------|--------------------|-----------------|------------------------|----------------------------------|-----------------|------------------------|----------------------------------|-----------------|------------------------|
| sequence: 1561                    |                    |                 |                        | sequence: 1561                   |                 |                        | sequence: 1561                   |                 |                        |
| total length: 1680566bp           |                    |                 |                        | total length: 1680566bp          |                 |                        | total length: 1680566bp          |                 |                        |
| GC level: 44.70%                  |                    |                 |                        | GC level: 44.70%                 |                 |                        | GC level: 44.70%                 |                 |                        |
| bases masked: 1044496 bp (62.15%) |                    |                 |                        | bases masked: 987478 bp (58.76%) |                 |                        | bases masked: 907532 bp (54.00%) |                 |                        |
| Repeat Types                      | Number of elements | Length occupied | Percentage of sequence | Number of elements               | Length occupied | Percentage of sequence | Number of elements               | Length occupied | Percentage of sequence |
| SINEs:                            | 325                | 62219 bp        | 3.70%                  | 292                              | 60826 bp        | 3.62%                  | 77                               | 10662 bp        | 0.63%                  |
| -ALUs:                            | 272                | 52570 bp        | 3.13%                  | 218                              | 50691 bp        | 3.02%                  | 44                               | 6817 bp         | 0.41%                  |
| -MIRs:                            | 8                  | 1464 bp         | 0.09%                  | 5                                | 439 bp          | 0.03%                  | 10                               | 1220 bp         | 0.07%                  |
| LINEs:                            | 822                | 581349 bp       | 34.59%                 | 477                              | 417481 bp       | 24.84%                 | 276                              | 357395 bp       | 21.27%                 |
| -LINE1:                           | 820                | 579118 bp       | 34.46%                 | 472                              | 416637 bp       | 24.79%                 | 275                              | 357213 bp       | 21.26%                 |
| -LINE2:                           | 1                  | 94 bp           | 0.01%                  | 4                                | 205 bp          | 0.01%                  | 1                                | 182 bp          | 0.01%                  |
| -L3/CR1:                          | 0                  | 0 bp            | 0.00%                  | 0                                | 0 bp            | 0.00%                  | 0                                | 0 bp            | 0.00%                  |
| LTR elements:                     | 493                | 343322 bp       | 20.43%                 | 659                              | 458817 bp       | 27.30%                 | 848                              | 483400 bp       | 28.76%                 |
| -ERV                              | 85                 | 56252 bp        | 3.35%                  | 83                               | 54386 bp        | 3.24%                  | 76                               | 61939 bp        | 3.69%                  |
| -ERV <sub>L</sub> -MaLRs          | 57                 | 10909 bp        | 0.65%                  | 71                               | 16563 bp        | 0.99%                  | 59                               | 16407 bp        | 0.98%                  |
| -ERV <sub>classI</sub>            | 78                 | 65804 bp        | 3.92%                  | 117                              | 86999 bp        | 5.18%                  | 135                              | 82306 bp        | 4.90%                  |
| -ERV <sub>classII</sub>           | 265                | 207985 bp       | 12.38%                 | 383                              | 291835 bp       | 17.37%                 | 575                              | 31922 bp        | 18.99%                 |
| DNA transposon elements:          | 57                 | 7136 bp         | 0.42%                  | 33                               | 4009 bp         | 0.24%                  | 36                               | 9446 bp         | 0.56%                  |
| -hAT-Charlie:                     | 32                 | 3880 bp         | 0.23%                  | 25                               | 3117 bp         | 0.19%                  | 24                               | 5297 bp         | 0.32%                  |
| -TcMar-Tigger:                    | 9                  | 1410 bp         | 0.08%                  | 1                                | 107 bp          | 0.01%                  | 9                                | 3608 bp         | 0.21%                  |
| Unclassified:                     | 53                 | 20086 bp        | 1.20%                  | 33                               | 9440 bp         | 0.56%                  | 18                               | 6587 bp         | 0.39%                  |
| Total interspersed repeats:       |                    | 1014112 bp      | 60.34%                 |                                  | 950573 bp       | 56.56%                 |                                  | 867490 bp       | 51.62%                 |
| Small RNA:                        | 29                 | 3693 bp         | 0.22%                  | 55                               | 4815 bp         | 0.29%                  | 2                                | 323 bp          | 0.02%                  |
| Satellites:                       | 8                  | 4208 bp         | 0.25%                  | 9                                | 4033 bp         | 0.24%                  | 4                                | 544 bp          | 0.03%                  |
| Simple repeats:                   | 314                | 36351 bp        | 2.16%                  | 327                              | 36959 bp        | 2.20%                  | 333                              | 37141 bp        | 2.21%                  |
| Low complexity:                   | 35                 | 1618 bp         | 0.10%                  | 40                               | 1873 bp         | 0.11%                  | 45                               | 2227 bp         | 0.13%                  |

**Table S21. Comparison of the proportion and detailed classification of detection results generated by three tools covering the repeat regions on the reference genome of *Drosophila*.**

| LongRepMarker                      |                 |                 |                        | RepeatScout                       |                 |                        | RepeatModeler2                   |                 |                        |
|------------------------------------|-----------------|-----------------|------------------------|-----------------------------------|-----------------|------------------------|----------------------------------|-----------------|------------------------|
| sequence: 15                       |                 |                 |                        | sequence: 15                      |                 |                        | sequence: 15                     |                 |                        |
| total length: 168736537bp          |                 |                 |                        | total length: 168736537bp         |                 |                        | total length: 168736537bp        |                 |                        |
| bases masked: 34098031 bp (20.21%) |                 |                 |                        | bases masked: 11038265 bp (6.54%) |                 |                        | bases masked: 9653964 bp (5.72%) |                 |                        |
| Repeat Types                       | Num of elements | Length occupied | Percentage of sequence | Num of elements                   | Length occupied | Percentage of sequence | Num of elements                  | Length occupied | Percentage of sequence |
| DNA:                               | 14298           | 1746619bp       | 1.04%                  | 3436                              | 635949bp        | 0.38%                  | 2061                             | 544394bp        | 0.32%                  |
| -Academ-1:                         | 6               | 3667bp          | 0.00%                  | 0                                 | 0bp             | 0.00%                  | 0                                | 0bp             | 0.00%                  |
| -CMC-EnSpm:                        | 9               | 3415bp          | 0.00%                  | 42                                | 4015bp          | 0.00%                  | 1                                | 87bp            | 0.00%                  |
| -CMC-Transib:                      | 1448            | 153013bp        | 0.09%                  | 950                               | 109301bp        | 0.06%                  | 206                              | 62009bp         | 0.04%                  |
| -Crypton-C:                        | 0               | 0bp             | 0.00%                  | 0                                 | 0bp             | 0.00%                  | 3                                | 499bp           | 0.00%                  |
| -Crypton-S:                        | 0               | 0bp             | 0.00%                  | 7                                 | 11414bp         | 0.01%                  | 0                                | 0bp             | 0.00%                  |
| -MULE-MuDR:                        | 12              | 7323bp          | 0.00%                  | 0                                 | 0bp             | 0.00%                  | 0                                | 0bp             | 0.00%                  |
| -MULE-NOF:                         | 726             | 100063bp        | 0.06%                  | 91                                | 9623bp          | 0.01%                  | 16                               | 7460bp          | 0.00%                  |
| -Maverick:                         | 14              | 6413bp          | 0.00%                  | 0                                 | 0bp             | 0.00%                  | 0                                | 0bp             | 0.00%                  |
| -MuLE-NOF:                         | 6               | 239bp           | 0.00%                  | 0                                 | 0bp             | 0.00%                  | 0                                | 0bp             | 0.00%                  |
| -OTHER:                            | 206             | 22100bp         | 0.01%                  | 132                               | 21553bp         | 0.01%                  | 34                               | 4726bp          | 0.00%                  |
| -P:                                | 6582            | 935918bp        | 0.55%                  | 879                               | 223592bp        | 0.13%                  | 1091                             | 229500bp        | 0.14%                  |
| -PIF-Harbinger:                    | 16              | 894bp           | 0.00%                  | 57                                | 5029bp          | 0.00%                  | 7                                | 1306bp          | 0.00%                  |
| -PiggyBac:                         | 19              | 955bp           | 0.00%                  | 20                                | 1242bp          | 0.00%                  | 0                                | 0bp             | 0.00%                  |
| -TcMar-Mariner:                    | 0               | 0bp             | 0.00%                  | 55                                | 2516bp          | 0.00%                  | 0                                | 0bp             | 0.00%                  |
| -TcMar-Pogo:                       | 717             | 54830bp         | 0.03%                  | 45                                | 22374bp         | 0.01%                  | 84                               | 28827bp         | 0.02%                  |
| -TcMar-Tc1:                        | 2423            | 260265bp        | 0.15%                  | 794                               | 130478bp        | 0.08%                  | 325                              | 128066bp        | 0.08%                  |
| -hAT-Ac:                           | 823             | 82579bp         | 0.05%                  | 118                               | 34518bp         | 0.02%                  | 102                              | 26511bp         | 0.02%                  |
| -hAT-Pegasus:                      | 0               | 0bp             | 0.00%                  | 0                                 | 0bp             | 0.00%                  | 12                               | 2875bp          | 0.00%                  |
| -hAT-Tag1:                         | 61              | 14006bp         | 0.01%                  | 0                                 | 0bp             | 0.00%                  | 0                                | 0bp             | 0.00%                  |
| -hAT-Tip100:                       | 25              | 14147bp         | 0.01%                  | 0                                 | 0bp             | 0.00%                  | 0                                | 0bp             | 0.00%                  |
| -hAT-hATm:                         | 13              | 9519bp          | 0.01%                  | 45                                | 5764bp          | 0.00%                  | 0                                | 0bp             | 0.00%                  |
| -hAT-hobo:                         | 1192            | 133839bp        | 0.08%                  | 201                               | 56995bp         | 0.03%                  | 180                              | 52528bp         | 0.03%                  |
| LINE:                              | 63010           | 7968013bp       | 4.72%                  | 8653                              | 2218122bp       | 1.31%                  | 9548                             | 2424426bp       | 1.44%                  |
| -CR1:                              | 3231            | 604771bp        | 0.36%                  | 510                               | 135201bp        | 0.08%                  | 536                              | 168043bp        | 0.10%                  |
| -I:                                | 1627            | 302608bp        | 0.18%                  | 218                               | 112053bp        | 0.07%                  | 224                              | 140677bp        | 0.08%                  |
| -I-Jockey:                         | 17000           | 2648503bp       | 1.57%                  | 3752                              | 885268bp        | 0.52%                  | 2788                             | 729222bp        | 0.43%                  |
| -Jockey:                           | 16801           | 2866297bp       | 1.70%                  | 2530                              | 666464bp        | 0.39%                  | 3827                             | 1058867bp       | 0.63%                  |
| -LOA:                              | 1108            | 166353bp        | 0.10%                  | 251                               | 104209bp        | 0.06%                  | 257                              | 98076bp         | 0.06%                  |
| -OTHER:                            | 127             | 94706bp         | 0.06%                  | 30                                | 17419bp         | 0.01%                  | 0                                | 0bp             | 0.00%                  |
| -R1:                               | 19563           | 2618643bp       | 1.55%                  | 1007                              | 322219bp        | 0.19%                  | 1495                             | 447221bp        | 0.27%                  |
| -R1-LOA:                           | 448             | 130728bp        | 0.08%                  | 234                               | 69698bp         | 0.04%                  | 174                              | 66079bp         | 0.04%                  |
| -R2:                               | 3087            | 205770bp        | 0.12%                  | 121                               | 58916bp         | 0.03%                  | 247                              | 64798bp         | 0.04%                  |
| -R2-NeSL:                          | 8               | 617bp           | 0.00%                  | 0                                 | 0bp             | 0.00%                  | 0                                | 0bp             | 0.00%                  |
| -RTE-X:                            | 10              | 17039bp         | 0.01%                  | 0                                 | 0bp             | 0.00%                  | 0                                | 0bp             | 0.00%                  |
| LTR:                               | 127541          | 15911903bp      | 9.43%                  | 22050                             | 6160703bp       | 3.65%                  | 17199                            | 5094134bp       | 3.02%                  |
| -Copia:                            | 7021            | 961221bp        | 0.57%                  | 1548                              | 475276bp        | 0.28%                  | 1172                             | 246734bp        | 0.18%                  |
| -ERVk:                             | 15              | 6458bp          | 0.00%                  | 0                                 | 0bp             | 0.00%                  | 0                                | 0bp             | 0.00%                  |
| -Gypsy:                            | 83678           | 11517560bp      | 6.83%                  | 17622                             | 4765804bp       | 2.82%                  | 12089                            | 3532468bp       | 2.09%                  |
| -Gypsy-Cigr:                       | 5               | 559bp           | 0.00%                  | 0                                 | 0bp             | 0.00%                  | 0                                | 0bp             | 0.00%                  |
| -OTHER:                            | 83              | 70018bp         | 0.04%                  | 48                                | 18971bp         | 0.01%                  | 12                               | 15980bp         | 0.01%                  |
| -Pao:                              | 35945           | 3426976bp       | 2.03%                  | 2780                              | 915238bp        | 0.54%                  | 3716                             | 1163954bp       | 0.69%                  |
| -Viper:                            | 794             | 34755bp         | 0.02%                  | 52                                | 5354bp          | 0.00%                  | 210                              | 84998bp         | 0.05%                  |
| Other:                             | 7666            | 660761bp        | 0.39%                  | 602                               | 152415bp        | 0.09%                  | 1162                             | 244620bp        | 0.14%                  |
| -OTHER:                            | 7666            | 660761bp        | 0.39%                  | 602                               | 152415bp        | 0.09%                  | 1162                             | 244620bp        | 0.14%                  |
| RC:                                | 1457            | 306200bp        | 0.18%                  | 1295                              | 183764bp        | 0.11%                  | 1091                             | 78447bp         | 0.05%                  |
| -Helitron:                         | 1457            | 306200bp        | 0.18%                  | 1295                              | 183764bp        | 0.11%                  | 1091                             | 78447bp         | 0.05%                  |
| RNA:                               | 116             | 20947bp         | 0.01%                  | 33                                | 1782bp          | 0.00%                  | 0                                | 0bp             | 0.00%                  |
| -OTHER:                            | 116             | 20947bp         | 0.01%                  | 33                                | 1782bp          | 0.00%                  | 0                                | 0bp             | 0.00%                  |
| SINE:                              | 236             | 31505bp         | 0.02%                  | 48                                | 2925bp          | 0.00%                  | 0                                | 0bp             | 0.00%                  |
| -S:                                | 98              | 25877bp         | 0.02%                  | 0                                 | 0bp             | 0.00%                  | 0                                | 0bp             | 0.00%                  |
| -ID:                               | 35              | 929bp           | 0.00%                  | 18                                | 884bp           | 0.00%                  | 0                                | 0bp             | 0.00%                  |
| -U:                                | 31              | 2135bp          | 0.00%                  | 12                                | 1273bp          | 0.00%                  | 0                                | 0bp             | 0.00%                  |
| -tRNA:                             | 31              | 1468bp          | 0.00%                  | 0                                 | 0bp             | 0.00%                  | 0                                | 0bp             | 0.00%                  |
| -tRNA-RTE:                         | 41              | 1096bp          | 0.00%                  | 18                                | 768bp           | 0.00%                  | 0                                | 0bp             | 0.00%                  |
| Satellite:                         | 25288           | 3682739bp       | 2.18%                  | 1004                              | 311451bp        | 0.18%                  | 1921                             | 447397bp        | 0.27%                  |
| -OTHER:                            | 25288           | 3682739bp       | 2.18%                  | 1004                              | 311451bp        | 0.18%                  | 1921                             | 447397bp        | 0.27%                  |
| Simple:                            | 4161            | 194894bp        | 0.12%                  | 21                                | 952bp           | 0.00%                  | 47                               | 1280bp          | 0.00%                  |
| -repeat:                           | 4161            | 194894bp        | 0.12%                  | 21                                | 952bp           | 0.00%                  | 47                               | 1280bp          | 0.00%                  |
| Unknown:                           | 42126           | 4185948bp       | 2.48%                  | 8897                              | 1152166bp       | 0.68%                  | 1829                             | 536752bp        | 0.32%                  |
| -OTHER:                            | 42126           | 4185948bp       | 2.48%                  | 8897                              | 1152166bp       | 0.68%                  | 1829                             | 536752bp        | 0.32%                  |
| rRNA:                              | 32958           | 1783949bp       | 1.06%                  | 1311                              | 501598bp        | 0.30%                  | 1069                             | 382183bp        | 0.23%                  |
| -OTHER:                            | 32958           | 1783949bp       | 1.06%                  | 1311                              | 501598bp        | 0.30%                  | 1069                             | 382183bp        | 0.23%                  |
| snRNA:                             | 34              | 1869bp          | 0.00%                  | 13                                | 697bp           | 0.00%                  | 0                                | 0bp             | 0.00%                  |
| -OTHER:                            | 34              | 1869bp          | 0.00%                  | 13                                | 697bp           | 0.00%                  | 0                                | 0bp             | 0.00%                  |
| tRNA:                              | 937             | 23307bp         | 0.01%                  | 244                               | 10805bp         | 0.01%                  | 30                               | 1870bp          | 0.00%                  |
| -OTHER:                            | 937             | 23307bp         | 0.01%                  | 244                               | 10805bp         | 0.01%                  | 30                               | 1870bp          | 0.00%                  |

Table S22. Comparison of the proportion and detailed classification of detection results generated by three tools covering the repeat regions on the reference genome of Ant.

| LongRepMarker                     |                 |                 |                        | RepeatScout                      |                 |                        | RepeatModeler2                   |                 |                        |
|-----------------------------------|-----------------|-----------------|------------------------|----------------------------------|-----------------|------------------------|----------------------------------|-----------------|------------------------|
| sequence: 4339                    |                 |                 |                        | sequence: 4339                   |                 |                        | sequence: 4339                   |                 |                        |
| total length: 295944863bp         |                 |                 |                        | total length: 295944863bp        |                 |                        | total length: 295944863bp        |                 |                        |
| bases masked: 11663344 bp (3.94%) |                 |                 |                        | bases masked: 8107022 bp (2.74%) |                 |                        | bases masked: 6083534 bp (2.06%) |                 |                        |
| Repeat Types                      | Num of elements | Length occupied | Percentage of sequence | Num of elements                  | Length occupied | Percentage of sequence | Num of elements                  | Length occupied | Percentage of sequence |
| <b>DNA:</b>                       | 61552           | 4928388bp       | 1.67%                  | 21001                            | 3243339bp       | 1.10%                  | 13753                            | 2645687bp       | 0.89%                  |
| -Academ-1:                        | 5               | 661bp           | 0.00%                  | 5                                | 195bp           | 0.00%                  | 2                                | 855bp           | 0.00%                  |
| -CMC-Chapaev-3:                   | 188             | 28829bp         | 0.01%                  | 290                              | 30211bp         | 0.01%                  | 147                              | 19438bp         | 0.01%                  |
| -CMC-EnSpm:                       | 150             | 44955bp         | 0.02%                  | 312                              | 29517bp         | 0.01%                  | 506                              | 81773bp         | 0.03%                  |
| -CMC-Transib:                     | 13              | 862bp           | 0.00%                  | 47                               | 7799bp          | 0.00%                  | 33                               | 8941bp          | 0.00%                  |
| -Crypton-V:                       | 40              | 4320bp          | 0.00%                  | 6                                | 441bp           | 0.00%                  | 32                               | 8088bp          | 0.00%                  |
| -IS3EU:                           | 8               | 3241bp          | 0.00%                  | 0                                | 0bp             | 0.00%                  | 4                                | 3048bp          | 0.00%                  |
| -Kolobok:                         | 0               | 0bp             | 0.00%                  | 15                               | 890bp           | 0.00%                  | 0                                | 0bp             | 0.00%                  |
| -Kolobok-Hydra:                   | 904             | 76209bp         | 0.03%                  | 252                              | 58495bp         | 0.02%                  | 196                              | 45029bp         | 0.02%                  |
| -Kolobok-T2:                      | 8759            | 585078bp        | 0.20%                  | 1287                             | 235738bp        | 0.08%                  | 1316                             | 197060bp        | 0.07%                  |
| -MULE-NOF:                        | 18              | 5612bp          | 0.00%                  | 133                              | 11398bp         | 0.00%                  | 278                              | 21158bp         | 0.01%                  |
| -Maverick:                        | 15263           | 860598bp        | 0.29%                  | 3905                             | 647332bp        | 0.22%                  | 1608                             | 366768bp        | 0.12%                  |
| -Merlin:                          | 69              | 21185bp         | 0.01%                  | 236                              | 13812bp         | 0.00%                  | 236                              | 34922bp         | 0.01%                  |
| -MuLE-NOF:                        | 4               | 2252bp          | 0.00%                  | 0                                | 0bp             | 0.00%                  | 0                                | 0bp             | 0.00%                  |
| -MuLE-NOF?:                       | 6               | 593bp           | 0.00%                  | 0                                | 0bp             | 0.00%                  | 0                                | 0bp             | 0.00%                  |
| -OTHER:                           | 661             | 179910bp        | 0.06%                  | 865                              | 107644bp        | 0.04%                  | 1064                             | 179133bp        | 0.06%                  |
| -P:                               | 34              | 2854bp          | 0.00%                  | 49                               | 3117bp          | 0.00%                  | 10                               | 661bp           | 0.00%                  |
| -PIF-Harbinger:                   | 15              | 1743bp          | 0.00%                  | 10                               | 579bp           | 0.00%                  | 30                               | 8444bp          | 0.00%                  |
| -PIF-ISL2EU:                      | 0               | 0bp             | 0.00%                  | 12                               | 2164bp          | 0.00%                  | 0                                | 0bp             | 0.00%                  |
| -PIF-Spy:                         | 18              | 1991bp          | 0.00%                  | 88                               | 6472bp          | 0.00%                  | 70                               | 10680bp         | 0.00%                  |
| -PiggyBac:                        | 63              | 8101bp          | 0.00%                  | 40                               | 12797bp         | 0.00%                  | 63                               | 13186bp         | 0.00%                  |
| -TcMar:                           | 343             | 28338bp         | 0.01%                  | 212                              | 21515bp         | 0.01%                  | 112                              | 17965bp         | 0.01%                  |
| -TcMar-Cweed:                     | 31              | 4601bp          | 0.00%                  | 13                               | 3442bp          | 0.00%                  | 20                               | 5722bp          | 0.00%                  |
| -TcMar-Fot1:                      | 24              | 14562bp         | 0.00%                  | 75                               | 7535bp          | 0.00%                  | 106                              | 26638bp         | 0.01%                  |
| -TcMar-Mariner:                   | 22053           | 2085501bp       | 0.70%                  | 8170                             | 1347878bp       | 0.46%                  | 4977                             | 873158bp        | 0.30%                  |
| -TcMar-Tc1:                       | 11262           | 892895bp        | 0.30%                  | 3641                             | 543181bp        | 0.18%                  | 2075                             | 527674bp        | 0.18%                  |
| -TcMar-Tc2:                       | 0               | 0bp             | 0.00%                  | 12                               | 1208bp          | 0.00%                  | 0                                | 0bp             | 0.00%                  |
| -TcMar-Tc4:                       | 1184            | 63484bp         | 0.02%                  | 562                              | 80535bp         | 0.03%                  | 351                              | 82578bp         | 0.03%                  |
| -TcMar-Tigger:                    | 5               | 434bp           | 0.00%                  | 0                                | 0bp             | 0.00%                  | 5                                | 361bp           | 0.00%                  |
| -hAT:                             | 79              | 9856bp          | 0.00%                  | 12                               | 4035bp          | 0.00%                  | 45                               | 13936bp         | 0.00%                  |
| -hAT-Ac:                          | 47              | 19373bp         | 0.01%                  | 78                               | 6889bp          | 0.00%                  | 132                              | 22484bp         | 0.01%                  |
| -hAT-Blackjack:                   | 210             | 19502bp         | 0.01%                  | 538                              | 47604bp         | 0.02%                  | 171                              | 44496bp         | 0.02%                  |
| -hAT-Charlie:                     | 70              | 28741bp         | 0.01%                  | 99                               | 10070bp         | 0.00%                  | 65                               | 17356bp         | 0.01%                  |
| -hAT-Pegasus:                     | 12              | 7622bp          | 0.00%                  | 0                                | 0bp             | 0.00%                  | 0                                | 0bp             | 0.00%                  |
| -hAT-Tip100:                      | 14              | 6534bp          | 0.00%                  | 20                               | 1961bp          | 0.00%                  | 25                               | 6450bp          | 0.00%                  |
| -hAT-Tol2:                        | 0               | 0bp             | 0.00%                  | 0                                | 0bp             | 0.00%                  | 6                                | 1256bp          | 0.00%                  |
| -hAT-hAT5:                        | 0               | 0bp             | 0.00%                  | 17                               | 2873bp          | 0.00%                  | 49                               | 4665bp          | 0.00%                  |
| -hAT-hATm:                        | 0               | 0bp             | 0.00%                  | 0                                | 0bp             | 0.00%                  | 19                               | 2698bp          | 0.00%                  |
| <b>LINE:</b>                      | 9011            | 812146bp        | 0.27%                  | 3027                             | 588373bp        | 0.20%                  | 1216                             | 486742bp        | 0.16%                  |
| -CR1:                             | 20              | 19115bp         | 0.01%                  | 18                               | 6510bp          | 0.00%                  | 0                                | 0bp             | 0.00%                  |
| -I:                               | 192             | 19925bp         | 0.01%                  | 248                              | 69549bp         | 0.02%                  | 32                               | 58207bp         | 0.02%                  |
| -I-Jockey:                        | 9               | 4831bp          | 0.00%                  | 37                               | 6688bp          | 0.00%                  | 0                                | 0bp             | 0.00%                  |
| -I-Nimb:                          | 8               | 2342bp          | 0.00%                  | 13                               | 2880bp          | 0.00%                  | 0                                | 0bp             | 0.00%                  |
| -Jockey:                          | 12              | 1190bp          | 0.00%                  | 99                               | 13519bp         | 0.00%                  | 17                               | 10396bp         | 0.00%                  |
| -L1-Tx1:                          | 4               | 629bp           | 0.00%                  | 0                                | 0bp             | 0.00%                  | 0                                | 0bp             | 0.00%                  |
| -L2:                              | 91              | 6760bp          | 0.00%                  | 133                              | 16803bp         | 0.01%                  | 75                               | 42141bp         | 0.01%                  |
| -LOA:                             | 17              | 1255bp          | 0.00%                  | 15                               | 662bp           | 0.00%                  | 16                               | 4685bp          | 0.00%                  |
| -OTHER:                           | 13              | 3399bp          | 0.00%                  | 78                               | 21893bp         | 0.01%                  | 0                                | 0bp             | 0.00%                  |
| -Penelope:                        | 6790            | 664008bp        | 0.22%                  | 1222                             | 308625bp        | 0.10%                  | 826                              | 232478bp        | 0.08%                  |
| -R1:                              | 1721            | 78389bp         | 0.03%                  | 770                              | 109806bp        | 0.04%                  | 190                              | 88219bp         | 0.03%                  |
| -R1-LOA:                          | 7               | 929bp           | 0.00%                  | 0                                | 0bp             | 0.00%                  | 0                                | 0bp             | 0.00%                  |
| -R2:                              | 0               | 0bp             | 0.00%                  | 18                               | 772bp           | 0.00%                  | 0                                | 0bp             | 0.00%                  |
| -R2-NeSL:                         | 36              | 2863bp          | 0.00%                  | 204                              | 15207bp         | 0.01%                  | 11                               | 7645bp          | 0.00%                  |
| -RTE-BovB:                        | 0               | 0bp             | 0.00%                  | 18                               | 480bp           | 0.00%                  | 16                               | 6982bp          | 0.00%                  |
| -RTE-X:                           | 91              | 9335bp          | 0.00%                  | 154                              | 24814bp         | 0.01%                  | 33                               | 35992bp         | 0.01%                  |
| <b>LTR:</b>                       | 18197           | 1058147bp       | 0.36%                  | 6199                             | 1143348bp       | 0.39%                  | 1531                             | 646274bp        | 0.22%                  |
| -Copia:                           | 1236            | 154160bp        | 0.05%                  | 819                              | 103383bp        | 0.03%                  | 82                               | 36843bp         | 0.01%                  |
| -DIRS:                            | 20              | 2470bp          | 0.00%                  | 38                               | 2339bp          | 0.00%                  | 0                                | 0bp             | 0.00%                  |
| -ERV1:                            | 7               | 1010bp          | 0.00%                  | 0                                | 0bp             | 0.00%                  | 0                                | 0bp             | 0.00%                  |
| -Gypsy:                           | 10849           | 606715bp        | 0.21%                  | 3330                             | 627049bp        | 0.21%                  | 1119                             | 399530bp        | 0.14%                  |
| -Gypsy-Cigr:                      | 3               | 217bp           | 0.00%                  | 25                               | 6012bp          | 0.00%                  | 10                               | 15761bp         | 0.01%                  |
| -Ngaro:                           | 0               | 0bp             | 0.00%                  | 0                                | 0bp             | 0.00%                  | 8                                | 536bp           | 0.00%                  |
| -OTHER:                           | 26              | 3672bp          | 0.00%                  | 6                                | 794bp           | 0.00%                  | 0                                | 0bp             | 0.00%                  |
| -Pao:                             | 6056            | 296097bp        | 0.10%                  | 1981                             | 405227bp        | 0.14%                  | 312                              | 193604bp        | 0.07%                  |
| <b>RC:</b>                        | 875             | 61951bp         | 0.02%                  | 755                              | 96732bp         | 0.03%                  | 242                              | 54578bp         | 0.02%                  |
| -Helitron:                        | 875             | 61951bp         | 0.02%                  | 755                              | 96732bp         | 0.03%                  | 242                              | 54578bp         | 0.02%                  |
| <b>RC?:</b>                       | 34              | 2757bp          | 0.00%                  | 41                               | 7518bp          | 0.00%                  | 57                               | 10149bp         | 0.00%                  |
| -Helitron:                        | 34              | 2757bp          | 0.00%                  | 41                               | 7518bp          | 0.00%                  | 57                               | 10149bp         | 0.00%                  |
| <b>SINE:</b>                      | 36              | 4021bp          | 0.00%                  | 91                               | 10888bp         | 0.00%                  | 8                                | 593bp           | 0.00%                  |
| -5S-Deu-L2:                       | 16              | 1836bp          | 0.00%                  | 31                               | 1429bp          | 0.00%                  | 0                                | 0bp             | 0.00%                  |
| -ID:                              | 13              | 507bp           | 0.00%                  | 0                                | 0bp             | 0.00%                  | 0                                | 0bp             | 0.00%                  |
| -U:                               | 4               | 631bp           | 0.00%                  | 0                                | 0bp             | 0.00%                  | 0                                | 0bp             | 0.00%                  |
| -tRNA-Deu:                        | 0               | 0bp             | 0.00%                  | 0                                | 0bp             | 0.00%                  | 8                                | 593bp           | 0.00%                  |
| -tRNA-Deu-RTE:                    | 0               | 0bp             | 0.00%                  | 32                               | 2021bp          | 0.00%                  | 0                                | 0bp             | 0.00%                  |
| -tRNA-RTE:                        | 3               | 1047bp          | 0.00%                  | 28                               | 7438bp          | 0.00%                  | 0                                | 0bp             | 0.00%                  |
| <b>Satellite:</b>                 | 8               | 510bp           | 0.00%                  | 24                               | 1801bp          | 0.00%                  | 84                               | 26817bp         | 0.01%                  |
| -OTHER:                           | 8               | 510bp           | 0.00%                  | 24                               | 1801bp          | 0.00%                  | 84                               | 26817bp         | 0.01%                  |
| <b>Simple:</b>                    | 2789            | 118800bp        | 0.04%                  | 134                              | 5618bp          | 0.00%                  | 233                              | 9291bp          | 0.00%                  |
| -repeat:                          | 2789            | 118800bp        | 0.04%                  | 134                              | 5618bp          | 0.00%                  | 233                              | 9291bp          | 0.00%                  |
| <b>Unknown:</b>                   | 90822           | 5172819bp       | 1.75%                  | 37373                            | 3080906bp       | 1.04%                  | 16856                            | 2217117bp       | 0.75%                  |
| -OTHER:                           | 90822           | 5172819bp       | 1.75%                  | 37373                            | 3080906bp       | 1.04%                  | 16856                            | 2217117bp       | 0.75%                  |
| <b>rRNA:</b>                      | 10              | 651bp           | 0.00%                  | 9                                | 820bp           | 0.00%                  | 0                                | 0bp             | 0.00%                  |
| -OTHER:                           | 10              | 651bp           | 0.00%                  | 9                                | 820bp           | 0.00%                  | 0                                | 0bp             | 0.00%                  |
| <b>tRNA:</b>                      | 24              | 813bp           | 0.00%                  | 41                               | 1404bp          | 0.00%                  | 0                                | 0bp             | 0.00%                  |
| -OTHER:                           | 24              | 813bp           | 0.00%                  | 41                               | 1404bp          | 0.00%                  | 0                                | 0bp             | 0.00%                  |

**Table S23. Comparison of the proportion and detailed classification of detection results generated by three tools covering the repeat regions on the reference genome of Gallus.**

| LongRepMarker                                                                    |                 |                 |                        | RepeatScout                                                                      |                 |                        | RepeatModeler2                                                                  |                 |                        |
|----------------------------------------------------------------------------------|-----------------|-----------------|------------------------|----------------------------------------------------------------------------------|-----------------|------------------------|---------------------------------------------------------------------------------|-----------------|------------------------|
| sequence: 464<br>total length: 1065365434bp<br>bases masked: 42433541 bp (3.98%) |                 |                 |                        | sequence: 464<br>total length: 1065365434bp<br>bases masked: 20799675 bp (1.95%) |                 |                        | sequence: 464<br>total length: 1065365434bp<br>bases masked: 5536215 bp (0.52%) |                 |                        |
| Repeat Types                                                                     | Num of elements | Length occupied | Percentage of sequence | Num of elements                                                                  | Length occupied | Percentage of sequence | Num of elements                                                                 | Length occupied | Percentage of sequence |
| DNA:                                                                             | 3822            | 1511276bp       | 0.14%                  | 5031                                                                             | 912863bp        | 0.09%                  | 1140                                                                            | 181739bp        | 0.02%                  |
| -Academ-1:                                                                       | 23              | 2714bp          | 0.00%                  | 0                                                                                | 0bp             | 0.00%                  | 0                                                                               | 0bp             | 0.00%                  |
| -CMC-EnSpm:                                                                      | 78              | 25210bp         | 0.00%                  | 72                                                                               | 132192bp        | 0.01%                  | 0                                                                               | 0bp             | 0.00%                  |
| -Crypton-H:                                                                      | 33              | 2518bp          | 0.00%                  | 0                                                                                | 0bp             | 0.00%                  | 0                                                                               | 0bp             | 0.00%                  |
| -Crypton-V:                                                                      | 8               | 6263bp          | 0.00%                  | 0                                                                                | 0bp             | 0.00%                  | 0                                                                               | 0bp             | 0.00%                  |
| -Ginger:                                                                         | 6               | 3423bp          | 0.00%                  | 0                                                                                | 0bp             | 0.00%                  | 0                                                                               | 0bp             | 0.00%                  |
| -Kolobok:                                                                        | 8               | 13471bp         | 0.00%                  | 0                                                                                | 0bp             | 0.00%                  | 1                                                                               | 84bp            | 0.00%                  |
| -Kolobok-T2:                                                                     | 4               | 10886bp         | 0.00%                  | 0                                                                                | 0bp             | 0.00%                  | 0                                                                               | 0bp             | 0.00%                  |
| -MULE-MuDR:                                                                      | 283             | 89603bp         | 0.01%                  | 6                                                                                | 1500bp          | 0.00%                  | 0                                                                               | 0bp             | 0.00%                  |
| -Maverick:                                                                       | 262             | 114224bp        | 0.01%                  | 41                                                                               | 75620bp         | 0.01%                  | 0                                                                               | 0bp             | 0.00%                  |
| -Merlin:                                                                         | 0               | 0bp             | 0.00%                  | 0                                                                                | 0bp             | 0.00%                  | 1                                                                               | 72bp            | 0.00%                  |
| -OTHER:                                                                          | 317             | 247749bp        | 0.02%                  | 66                                                                               | 80479bp         | 0.01%                  | 48                                                                              | 69962bp         | 0.01%                  |
| -P:                                                                              | 15              | 2610bp          | 0.00%                  | 0                                                                                | 0bp             | 0.00%                  | 0                                                                               | 0bp             | 0.00%                  |
| -PIF-Harbinger:                                                                  | 302             | 107185bp        | 0.01%                  | 0                                                                                | 0bp             | 0.00%                  | 0                                                                               | 0bp             | 0.00%                  |
| -Sola-1:                                                                         | 502             | 22630bp         | 0.00%                  | 0                                                                                | 0bp             | 0.00%                  | 0                                                                               | 0bp             | 0.00%                  |
| -Sola-3:                                                                         | 150             | 115060bp        | 0.01%                  | 37                                                                               | 51791bp         | 0.00%                  | 0                                                                               | 0bp             | 0.00%                  |
| -TcMar-Fot1:                                                                     | 12              | 1689bp          | 0.00%                  | 0                                                                                | 0bp             | 0.00%                  | 0                                                                               | 0bp             | 0.00%                  |
| -TcMar-ISRm11:                                                                   | 2               | 1051bp          | 0.00%                  | 0                                                                                | 0bp             | 0.00%                  | 0                                                                               | 0bp             | 0.00%                  |
| -TcMar-Mariner:                                                                  | 808             | 403624bp        | 0.04%                  | 3758                                                                             | 353035bp        | 0.03%                  | 613                                                                             | 32204bp         | 0.00%                  |
| -TcMar-Tc1:                                                                      | 38              | 69659bp         | 0.01%                  | 153                                                                              | 47006bp         | 0.00%                  | 0                                                                               | 0bp             | 0.00%                  |
| -TcMar-Tc2:                                                                      | 26              | 16269bp         | 0.00%                  | 0                                                                                | 0bp             | 0.00%                  | 0                                                                               | 0bp             | 0.00%                  |
| -Zisupton:                                                                       | 4               | 316bp           | 0.00%                  | 0                                                                                | 0bp             | 0.00%                  | 0                                                                               | 0bp             | 0.00%                  |
| -hAT-Ac:                                                                         | 390             | 70181bp         | 0.01%                  | 12                                                                               | 21691bp         | 0.00%                  | 98                                                                              | 7270bp          | 0.00%                  |
| -hAT-Charlie:                                                                    | 482             | 199204bp        | 0.02%                  | 856                                                                              | 170526bp        | 0.02%                  | 309                                                                             | 29345bp         | 0.00%                  |
| -hAT-Pegasus:                                                                    | 34              | 3633bp          | 0.00%                  | 0                                                                                | 0bp             | 0.00%                  | 0                                                                               | 0bp             | 0.00%                  |
| -hAT-Tag1:                                                                       | 32              | 25488bp         | 0.00%                  | 0                                                                                | 0bp             | 0.00%                  | 70                                                                              | 43049bp         | 0.00%                  |
| -hAT-Tip100:                                                                     | 3               | 1764bp          | 0.00%                  | 30                                                                               | 26124bp         | 0.00%                  | 0                                                                               | 0bp             | 0.00%                  |
| LINE:                                                                            | 56995           | 18851002bp      | 1.77%                  | 21417                                                                            | 9128535bp       | 0.86%                  | 5733                                                                            | 1644540bp       | 0.15%                  |
| -CR1:                                                                            | 55670           | 18534186bp      | 1.74%                  | 20926                                                                            | 8781356bp       | 0.82%                  | 5637                                                                            | 1581687bp       | 0.15%                  |
| -CRE:                                                                            | 14              | 5276bp          | 0.00%                  | 27                                                                               | 7600bp          | 0.00%                  | 0                                                                               | 0bp             | 0.00%                  |
| -Dualet:                                                                         | 8               | 1107bp          | 0.00%                  | 0                                                                                | 0bp             | 0.00%                  | 0                                                                               | 0bp             | 0.00%                  |
| -I:                                                                              | 5               | 3620bp          | 0.00%                  | 0                                                                                | 0bp             | 0.00%                  | 0                                                                               | 0bp             | 0.00%                  |
| -I-Jockey:                                                                       | 38              | 12045bp         | 0.00%                  | 35                                                                               | 16396bp         | 0.00%                  | 0                                                                               | 0bp             | 0.00%                  |
| -Jockey:                                                                         | 6               | 809bp           | 0.00%                  | 0                                                                                | 0bp             | 0.00%                  | 0                                                                               | 0bp             | 0.00%                  |
| -L1:                                                                             | 149             | 72778bp         | 0.01%                  | 44                                                                               | 14629bp         | 0.00%                  | 0                                                                               | 0bp             | 0.00%                  |
| -L1-Tx1:                                                                         | 3               | 1078bp          | 0.00%                  | 0                                                                                | 0bp             | 0.00%                  | 0                                                                               | 0bp             | 0.00%                  |
| -L2:                                                                             | 91              | 39329bp         | 0.00%                  | 8                                                                                | 3299bp          | 0.00%                  | 0                                                                               | 0bp             | 0.00%                  |
| -OTHER:                                                                          | 36              | 63317bp         | 0.01%                  | 30                                                                               | 53672bp         | 0.01%                  | 0                                                                               | 0bp             | 0.00%                  |
| -Penelope:                                                                       | 84              | 27397bp         | 0.00%                  | 12                                                                               | 11438bp         | 0.00%                  | 1                                                                               | 68bp            | 0.00%                  |
| -R1:                                                                             | 18              | 5410bp          | 0.00%                  | 6                                                                                | 1848bp          | 0.00%                  | 0                                                                               | 0bp             | 0.00%                  |
| -R1-LOA:                                                                         | 5               | 708bp           | 0.00%                  | 0                                                                                | 0bp             | 0.00%                  | 0                                                                               | 0bp             | 0.00%                  |
| -R2:                                                                             | 108             | 44374bp         | 0.00%                  | 13                                                                               | 10243bp         | 0.00%                  | 0                                                                               | 0bp             | 0.00%                  |
| -R2-NeSL:                                                                        | 0               | 0bp             | 0.00%                  | 32                                                                               | 3639bp          | 0.00%                  | 0                                                                               | 0bp             | 0.00%                  |
| -RTE-BovB:                                                                       | 621             | 190155bp        | 0.02%                  | 246                                                                              | 148447bp        | 0.01%                  | 68                                                                              | 33152bp         | 0.00%                  |
| -RTE-RTE:                                                                        | 4               | 3340bp          | 0.00%                  | 0                                                                                | 0bp             | 0.00%                  | 0                                                                               | 0bp             | 0.00%                  |
| -RTE-X:                                                                          | 20              | 806bp           | 0.00%                  | 0                                                                                | 0bp             | 0.00%                  | 0                                                                               | 0bp             | 0.00%                  |
| -Rex-Babar:                                                                      | 21              | 7980bp          | 0.00%                  | 0                                                                                | 0bp             | 0.00%                  | 0                                                                               | 0bp             | 0.00%                  |
| -Tad1:                                                                           | 94              | 46982bp         | 0.00%                  | 38                                                                               | 108756bp        | 0.01%                  | 27                                                                              | 29633bp         | 0.00%                  |
| LTR:                                                                             | 43275           | 11135452bp      | 1.05%                  | 13471                                                                            | 6181751bp       | 0.58%                  | 4671                                                                            | 167393bp        | 0.16%                  |
| -Caulimovirus:                                                                   | 2               | 144bp           | 0.00%                  | 0                                                                                | 0bp             | 0.00%                  | 0                                                                               | 0bp             | 0.00%                  |
| -Copia:                                                                          | 327             | 175566bp        | 0.02%                  | 157                                                                              | 44498bp         | 0.00%                  | 18                                                                              | 3003bp          | 0.00%                  |
| -DIRS:                                                                           | 44              | 32002bp         | 0.00%                  | 0                                                                                | 0bp             | 0.00%                  | 0                                                                               | 0bp             | 0.00%                  |
| -ERV:                                                                            | 106             | 296823bp        | 0.03%                  | 66                                                                               | 17155bp         | 0.00%                  | 0                                                                               | 0bp             | 0.00%                  |
| -ERV1:                                                                           | 10494           | 2734741bp       | 0.26%                  | 2796                                                                             | 1434650bp       | 0.13%                  | 596                                                                             | 354862bp        | 0.03%                  |
| -ERVK:                                                                           | 4556            | 1884644bp       | 0.18%                  | 2169                                                                             | 1111518bp       | 0.10%                  | 387                                                                             | 371455bp        | 0.03%                  |
| -ERVL:                                                                           | 26177           | 6443868bp       | 0.60%                  | 7655                                                                             | 3383117bp       | 0.32%                  | 3567                                                                            | 813946bp        | 0.08%                  |
| -Gypsy:                                                                          | 1098            | 559901bp        | 0.05%                  | 377                                                                              | 280499bp        | 0.03%                  | 96                                                                              | 81314bp         | 0.01%                  |
| -Ngaro:                                                                          | 118             | 82877bp         | 0.01%                  | 115                                                                              | 88812bp         | 0.01%                  | 0                                                                               | 0bp             | 0.00%                  |
| -OTHER:                                                                          | 102             | 49259bp         | 0.00%                  | 0                                                                                | 0bp             | 0.00%                  | 0                                                                               | 0bp             | 0.00%                  |
| -Pao:                                                                            | 186             | 48475bp         | 0.00%                  | 121                                                                              | 47928bp         | 0.00%                  | 7                                                                               | 42854bp         | 0.00%                  |
| -Viper:                                                                          | 65              | 5407bp          | 0.00%                  | 15                                                                               | 3421bp          | 0.00%                  | 0                                                                               | 0bp             | 0.00%                  |
| RC:                                                                              | 306             | 156071bp        | 0.01%                  | 0                                                                                | 0bp             | 0.00%                  | 0                                                                               | 0bp             | 0.00%                  |
| -Helitron:                                                                       | 306             | 156071bp        | 0.01%                  | 0                                                                                | 0bp             | 0.00%                  | 0                                                                               | 0bp             | 0.00%                  |
| SINE:                                                                            | 1305            | 106966bp        | 0.01%                  | 171                                                                              | 94937bp         | 0.01%                  | 32                                                                              | 18473bp         | 0.00%                  |
| -S:                                                                              | 1146            | 65107bp         | 0.01%                  | 27                                                                               | 71939bp         | 0.01%                  | 0                                                                               | 0bp             | 0.00%                  |
| -S-Deu-L2:                                                                       | 47              | 5513bp          | 0.00%                  | 9                                                                                | 1712bp          | 0.00%                  | 1                                                                               | 51bp            | 0.00%                  |
| -S-Sauria-RTE:                                                                   | 33              | 3924bp          | 0.00%                  | 0                                                                                | 0bp             | 0.00%                  | 0                                                                               | 0bp             | 0.00%                  |
| -Alu:                                                                            | 4               | 672bp           | 0.00%                  | 0                                                                                | 0bp             | 0.00%                  | 0                                                                               | 0bp             | 0.00%                  |
| -ID:                                                                             | 5               | 746bp           | 0.00%                  | 31                                                                               | 9037bp          | 0.00%                  | 17                                                                              | 780bp           | 0.00%                  |
| -MIR:                                                                            | 8               | 2034bp          | 0.00%                  | 0                                                                                | 0bp             | 0.00%                  | 3                                                                               | 259bp           | 0.00%                  |
| -U:                                                                              | 42              | 2643bp          | 0.00%                  | 16                                                                               | 2405bp          | 0.00%                  | 0                                                                               | 0bp             | 0.00%                  |
| -tRNA:                                                                           | 20              | 34709bp         | 0.00%                  | 56                                                                               | 3977bp          | 0.00%                  | 11                                                                              | 17383bp         | 0.00%                  |
| -tRNA-RTE:                                                                       | 0               | 0bp             | 0.00%                  | 15                                                                               | 666bp           | 0.00%                  | 0                                                                               | 0bp             | 0.00%                  |
| -tRNA-Sauria-L2:                                                                 | 0               | 0bp             | 0.00%                  | 17                                                                               | 5201bp          | 0.00%                  | 0                                                                               | 0bp             | 0.00%                  |
| SINE?:                                                                           | 4               | 23697bp         | 0.00%                  | 0                                                                                | 0bp             | 0.00%                  | 0                                                                               | 0bp             | 0.00%                  |
| -OTHER:                                                                          | 4               | 23697bp         | 0.00%                  | 0                                                                                | 0bp             | 0.00%                  | 0                                                                               | 0bp             | 0.00%                  |
| Satellite:                                                                       | 52126           | 5494345bp       | 0.52%                  | 1073                                                                             | 1000942bp       | 0.09%                  | 918                                                                             | 312522bp        | 0.03%                  |
| -OTHER:                                                                          | 4012            | 954380bp        | 0.09%                  | 483                                                                              | 354123bp        | 0.03%                  | 657                                                                             | 90115bp         | 0.01%                  |
| -W-chromosome:                                                                   | 39006           | 3152502bp       | 0.30%                  | 150                                                                              | 83642bp         | 0.01%                  | 118                                                                             | 58903bp         | 0.01%                  |
| -macro:                                                                          | 9035            | 1414666bp       | 0.13%                  | 440                                                                              | 565025bp        | 0.05%                  | 143                                                                             | 163504bp        | 0.02%                  |
| -telomeric:                                                                      | 73              | 3671bp          | 0.00%                  | 0                                                                                | 0bp             | 0.00%                  | 0                                                                               | 0bp             | 0.00%                  |
| Simple:                                                                          | 17471           | 1919486bp       | 0.18%                  | 148                                                                              | 49253bp         | 0.00%                  | 600                                                                             | 28340bp         | 0.00%                  |
| -repeat:                                                                         | 17471           | 1919486bp       | 0.18%                  | 148                                                                              | 49253bp         | 0.00%                  | 600                                                                             | 28340bp         | 0.00%                  |
| Unknown:                                                                         | 164468          | 14768863bp      | 1.39%                  | 25911                                                                            | 5449676bp       | 0.51%                  | 3434                                                                            | 1710324bp       | 0.16%                  |
| -OTHER:                                                                          | 164468          | 14768863bp      | 1.39%                  | 25911                                                                            | 5449676bp       | 0.51%                  | 3434                                                                            | 1710324bp       | 0.16%                  |
| rRNA:                                                                            | 120             | 44087bp         | 0.00%                  | 104                                                                              | 4719bp          | 0.00%                  | 0                                                                               | 0bp             | 0.00%                  |
| -OTHER:                                                                          | 120             | 44087bp         | 0.00%                  | 104                                                                              | 4719bp          | 0.00%                  | 0                                                                               | 0bp             | 0.00%                  |
| snRNA:                                                                           | 25              | 1699bp          | 0.00%                  | 39                                                                               | 2858bp          | 0.00%                  | 0                                                                               | 0bp             | 0.00%                  |
| -OTHER:                                                                          | 25              | 1699bp          | 0.00%                  | 39                                                                               | 2858bp          | 0.00%                  | 0                                                                               | 0bp             | 0.00%                  |
| tRNA:                                                                            | 245             | 32157bp         | 0.00%                  | 209                                                                              | 19120bp         | 0.00%                  | 0                                                                               | 0bp             | 0.00%                  |
| -OTHER:                                                                          | 245             | 32157bp         | 0.00%                  | 209                                                                              | 19120bp         | 0.00%                  | 0                                                                               | 0bp             | 0.00%                  |

Table S24. Comparison of the proportion and detailed classification of detection results generated by three tools covering the repeat regions on the reference genome of Soybean.

| LongRepMarker                       |       |                 |                 | RepeatScout                       |                 |                 | RepeatModeler2                    |                 |                 |                        |
|-------------------------------------|-------|-----------------|-----------------|-----------------------------------|-----------------|-----------------|-----------------------------------|-----------------|-----------------|------------------------|
| sequence: 1192                      |       |                 |                 | sequence: 1192                    |                 |                 | sequence: 1192                    |                 |                 |                        |
| total length: 979046046bp           |       |                 |                 | total length: 979046046bp         |                 |                 | total length: 979046046bp         |                 |                 |                        |
| bases masked: 114369952 bp (11.68%) |       |                 |                 | bases masked: 71264358 bp (7.28%) |                 |                 | bases masked: 34575219 bp (3.53%) |                 |                 |                        |
| Repeat                              | Types | Num of elements | Length occupied | Percentage of sequence            | Num of elements | Length occupied | Percentage of sequence            | Num of elements | Length occupied | Percentage of sequence |
| DNA:                                |       | 106809          | 14542224bp      | 1.49%                             | 20051           | 10557566bp      | 1.08%                             | 7539            | 3646588bp       | 0.37%                  |
| -Academ:                            |       | 5               | 459bp           | 0.00%                             | 4               | 548bp           | 0.00%                             | 0               | 0bp             | 0.00%                  |
| -CMC-Chapaev-3:                     |       | 0               | 0bp             | 0.00%                             | 7               | 701bp           | 0.00%                             | 0               | 0bp             | 0.00%                  |
| -CMC-EnSpm:                         |       | 38904           | 5942067bp       | 0.61%                             | 7066            | 4754427bp       | 0.49%                             | 2202            | 1635440bp       | 0.17%                  |
| -Crypton-S:                         |       | 0               | 0bp             | 0.00%                             | 0               | 0bp             | 0.00%                             | 50              | 11078bp         | 0.00%                  |
| -Dada:                              |       | 0               | 0bp             | 0.00%                             | 9               | 3312bp          | 0.00%                             | 0               | 0bp             | 0.00%                  |
| -Ginger:                            |       | 9               | 952bp           | 0.00%                             | 0               | 0bp             | 0.00%                             | 0               | 0bp             | 0.00%                  |
| -Kolobok-Hydra:                     |       | 4               | 9588bp          | 0.00%                             | 0               | 0bp             | 0.00%                             | 0               | 0bp             | 0.00%                  |
| -Kolobok-T2:                        |       | 0               | 0bp             | 0.00%                             | 30              | 5822bp          | 0.00%                             | 0               | 0bp             | 0.00%                  |
| -MULE-MuDR:                         |       | 46960           | 4916688bp       | 0.50%                             | 6121            | 2079584bp       | 0.21%                             | 2484            | 536042bp        | 0.05%                  |
| -Maverick:                          |       | 23              | 27518bp         | 0.00%                             | 17              | 6160bp          | 0.00%                             | 6               | 3296bp          | 0.00%                  |
| -MuLE-MuDR:                         |       | 7112            | 2351881bp       | 0.24%                             | 2161            | 1913232bp       | 0.20%                             | 1230            | 598916bp        | 0.06%                  |
| -OTHER:                             |       | 417             | 159727bp        | 0.02%                             | 133             | 22098bp         | 0.00%                             | 82              | 34876bp         | 0.00%                  |
| -P:                                 |       | 4               | 2481bp          | 0.00%                             | 0               | 0bp             | 0.00%                             | 0               | 0bp             | 0.00%                  |
| -PIF-Harbinger:                     |       | 2649            | 605943bp        | 0.06%                             | 912             | 438339bp        | 0.04%                             | 203             | 173191bp        | 0.02%                  |
| -PIF-ISL2EU:                        |       | 4               | 1727bp          | 0.00%                             | 0               | 0bp             | 0.00%                             | 0               | 0bp             | 0.00%                  |
| -PiggyBac:                          |       | 8               | 4081bp          | 0.00%                             | 0               | 0bp             | 0.00%                             | 0               | 0bp             | 0.00%                  |
| -PiggyBac-X:                        |       | 20              | 25786bp         | 0.00%                             | 39              | 8935bp          | 0.00%                             | 0               | 0bp             | 0.00%                  |
| -Sola-2:                            |       | 4               | 777bp           | 0.00%                             | 30              | 7437bp          | 0.00%                             | 0               | 0bp             | 0.00%                  |
| -TcMar-Ant1:                        |       | 0               | 0bp             | 0.00%                             | 9               | 643bp           | 0.00%                             | 0               | 0bp             | 0.00%                  |
| -TcMar-Mariner:                     |       | 4               | 4551bp          | 0.00%                             | 0               | 0bp             | 0.00%                             | 0               | 0bp             | 0.00%                  |
| -TcMar-Pogo:                        |       | 639             | 34588bp         | 0.00%                             | 72              | 54816bp         | 0.01%                             | 30              | 50049bp         | 0.01%                  |
| -TcMar-Sagan:                       |       | 4               | 615bp           | 0.00%                             | 7               | 1307bp          | 0.00%                             | 0               | 0bp             | 0.00%                  |
| -TcMar-Stowaway:                    |       | 257             | 34581bp         | 0.00%                             | 111             | 38163bp         | 0.00%                             | 87              | 7277bp          | 0.00%                  |
| -TcMar-Tc1:                         |       | 4               | 995bp           | 0.00%                             | 20              | 53065bp         | 0.01%                             | 0               | 0bp             | 0.00%                  |
| -TcMar-Tc2:                         |       | 4               | 1260bp          | 0.00%                             | 0               | 0bp             | 0.00%                             | 0               | 0bp             | 0.00%                  |
| -Zisupton:                          |       | 0               | 0bp             | 0.00%                             | 16              | 3683bp          | 0.00%                             | 0               | 0bp             | 0.00%                  |
| -hAT:                               |       | 0               | 0bp             | 0.00%                             | 0               | 0bp             | 0.00%                             | 3               | 1238bp          | 0.00%                  |
| -hAT-Ac:                            |       | 4312            | 567858bp        | 0.06%                             | 1442            | 539494bp        | 0.06%                             | 526             | 227784bp        | 0.02%                  |
| -hAT-Charlie:                       |       | 47              | 72861bp         | 0.01%                             | 89              | 55172bp         | 0.01%                             | 7               | 841bp           | 0.00%                  |
| -hAT-Tag1:                          |       | 3393            | 609331bp        | 0.06%                             | 1102            | 471859bp        | 0.05%                             | 462             | 246197bp        | 0.03%                  |
| -hAT-Tip100:                        |       | 2016            | 326734bp        | 0.03%                             | 654             | 311843bp        | 0.03%                             | 167             | 125997bp        | 0.01%                  |
| -hAT-hATm:                          |       | 6               | 922bp           | 0.00%                             | 0               | 0bp             | 0.00%                             | 0               | 0bp             | 0.00%                  |
| LINE:                               |       | 37045           | 6097857bp       | 0.62%                             | 7344            | 2716876bp       | 0.28%                             | 1131            | 484156bp        | 0.05%                  |
| -CR1:                               |       | 8               | 1506bp          | 0.00%                             | 4               | 292bp           | 0.00%                             | 0               | 0bp             | 0.00%                  |
| -I:                                 |       | 28              | 36121bp         | 0.00%                             | 10              | 643bp           | 0.00%                             | 0               | 0bp             | 0.00%                  |
| -I-Jockey:                          |       | 32              | 14094bp         | 0.00%                             | 24              | 17633bp         | 0.00%                             | 0               | 0bp             | 0.00%                  |
| -L1:                                |       | 29043           | 4557691bp       | 0.47%                             | 6382            | 2450341bp       | 0.25%                             | 768             | 302687bp        | 0.03%                  |
| -L1-DRE:                            |       | 3               | 980bp           | 0.00%                             | 0               | 0bp             | 0.00%                             | 0               | 0bp             | 0.00%                  |
| -L1-Tx1:                            |       | 8               | 13550bp         | 0.00%                             | 18              | 1742bp          | 0.00%                             | 0               | 0bp             | 0.00%                  |
| -L2:                                |       | 60              | 26784bp         | 0.00%                             | 41              | 12442bp         | 0.00%                             | 0               | 0bp             | 0.00%                  |
| -Penelope:                          |       | 17              | 1300bp          | 0.00%                             | 0               | 0bp             | 0.00%                             | 0               | 0bp             | 0.00%                  |
| -R1:                                |       | 4               | 891bp           | 0.00%                             | 79              | 9697bp          | 0.00%                             | 0               | 0bp             | 0.00%                  |
| -RTE-BovB:                          |       | 7834            | 1442598bp       | 0.15%                             | 743             | 219475bp        | 0.02%                             | 363             | 181469bp        | 0.02%                  |
| -RTE-X:                             |       | 8               | 2343bp          | 0.00%                             | 23              | 1784bp          | 0.00%                             | 0               | 0bp             | 0.00%                  |
| -Tad1:                              |       | 0               | 0bp             | 0.00%                             | 20              | 7517bp          | 0.00%                             | 0               | 0bp             | 0.00%                  |
| LTR:                                |       | 295825          | 61894913bp      | 6.32%                             | 63182           | 37377343bp      | 3.82%                             | 39408           | 26440652bp      | 2.70%                  |
| -Cassandra:                         |       | 101             | 2593bp          | 0.00%                             | 172             | 56698bp         | 0.01%                             | 20              | 44852bp         | 0.00%                  |
| -Caulimovirus:                      |       | 11692           | 1038067bp       | 0.11%                             | 677             | 563737bp        | 0.06%                             | 162             | 274336bp        | 0.03%                  |
| -Copia:                             |       | 110672          | 24312006bp      | 2.48%                             | 26274           | 14979052bp      | 1.53%                             | 14652           | 7864320bp       | 0.80%                  |
| -DIRS:                              |       | 0               | 0bp             | 0.00%                             | 7               | 841bp           | 0.00%                             | 0               | 0bp             | 0.00%                  |
| -ERV1:                              |       | 60              | 85955bp         | 0.01%                             | 115             | 108958bp        | 0.01%                             | 3               | 3467bp          | 0.00%                  |
| -ERV4:                              |       | 4               | 5441bp          | 0.00%                             | 0               | 0bp             | 0.00%                             | 0               | 0bp             | 0.00%                  |
| -ERVK:                              |       | 27              | 3588bp          | 0.00%                             | 9               | 447bp           | 0.00%                             | 4               | 2719bp          | 0.00%                  |
| -ERVL:                              |       | 4               | 1868bp          | 0.00%                             | 6               | 366bp           | 0.00%                             | 0               | 0bp             | 0.00%                  |
| -Gypsy:                             |       | 172762          | 36628195bp      | 3.74%                             | 35605           | 21647150bp      | 2.21%                             | 24478           | 18348200bp      | 1.87%                  |
| -Ngaro:                             |       | 8               | 1217bp          | 0.00%                             | 0               | 0bp             | 0.00%                             | 0               | 0bp             | 0.00%                  |
| -OTHER:                             |       | 422             | 93749bp         | 0.01%                             | 231             | 41367bp         | 0.00%                             | 70              | 12408bp         | 0.00%                  |
| -Pao:                               |       | 73              | 39864bp         | 0.00%                             | 86              | 54808bp         | 0.01%                             | 19              | 55790bp         | 0.01%                  |
| RC:                                 |       | 6109            | 1139535bp       | 0.12%                             | 2412            | 1621569bp       | 0.17%                             | 309             | 295295bp        | 0.03%                  |
| -Helitron:                          |       | 6109            | 1139535bp       | 0.12%                             | 2412            | 1621569bp       | 0.17%                             | 309             | 295295bp        | 0.03%                  |
| RC?:                                |       | 7               | 10011bp         | 0.00%                             | 7               | 1218bp          | 0.00%                             | 0               | 0bp             | 0.00%                  |
| -Helitron:                          |       | 7               | 10011bp         | 0.00%                             | 7               | 1218bp          | 0.00%                             | 0               | 0bp             | 0.00%                  |
| Retroposon:                         |       | 21              | 8073bp          | 0.00%                             | 0               | 0bp             | 0.00%                             | 0               | 0bp             | 0.00%                  |
| -OTHER:                             |       | 21              | 8073bp          | 0.00%                             | 0               | 0bp             | 0.00%                             | 0               | 0bp             | 0.00%                  |
| SINE:                               |       | 1330            | 172682bp        | 0.02%                             | 116             | 15489bp         | 0.00%                             | 63              | 26309bp         | 0.00%                  |
| -ID:                                |       | 29              | 1449bp          | 0.00%                             | 30              | 1901bp          | 0.00%                             | 2               | 116bp           | 0.00%                  |
| -OTHER:                             |       | 14              | 2977bp          | 0.00%                             | 0               | 0bp             | 0.00%                             | 22              | 1975bp          | 0.00%                  |
| -tRNA:                              |       | 16              | 5194bp          | 0.00%                             | 0               | 0bp             | 0.00%                             | 5               | 6402bp          | 0.00%                  |
| -tRNA-RTE:                          |       | 1271            | 167864bp        | 0.02%                             | 86              | 13588bp         | 0.00%                             | 34              | 17816bp         | 0.00%                  |
| SINE?:                              |       | 9               | 2128bp          | 0.00%                             | 0               | 0bp             | 0.00%                             | 9               | 1516bp          | 0.00%                  |
| -OTHER:                             |       | 9               | 2128bp          | 0.00%                             | 0               | 0bp             | 0.00%                             | 9               | 1516bp          | 0.00%                  |
| Satellite:                          |       | 1261            | 176627bp        | 0.02%                             | 608             | 54962bp         | 0.01%                             | 106             | 83562bp         | 0.01%                  |
| -OTHER:                             |       | 1253            | 166304bp        | 0.02%                             | 608             | 54962bp         | 0.01%                             | 106             | 83562bp         | 0.01%                  |
| -centromeric:                       |       | 8               | 10323bp         | 0.00%                             | 0               | 0bp             | 0.00%                             | 0               | 0bp             | 0.00%                  |
| Simple:                             |       | 16713           | 731173bp        | 0.07%                             | 331             | 18706bp         | 0.00%                             | 69              | 2855bp          | 0.00%                  |
| -repeat:                            |       | 16713           | 731173bp        | 0.07%                             | 331             | 18706bp         | 0.00%                             | 69              | 2855bp          | 0.00%                  |
| Unknown:                            |       | 495250          | 35074975bp      | 3.58%                             | 170755          | 20649747bp      | 2.11%                             | 10664           | 2827024bp       | 0.29%                  |
| -OTHER:                             |       | 495250          | 35074975bp      | 3.58%                             | 170755          | 20649747bp      | 2.11%                             | 10664           | 2827024bp       | 0.29%                  |
| rRNA:                               |       | 28544           | 854797bp        | 0.09%                             | 70              | 189019bp        | 0.02%                             | 88              | 837906bp        | 0.09%                  |
| -OTHER:                             |       | 28544           | 854797bp        | 0.09%                             | 70              | 189019bp        | 0.02%                             | 88              | 837906bp        | 0.09%                  |
| snRNA:                              |       | 88              | 3651bp          | 0.00%                             | 92              | 4331bp          | 0.00%                             | 30              | 3285bp          | 0.00%                  |
| -OTHER:                             |       | 88              | 3651bp          | 0.00%                             | 92              | 4331bp          | 0.00%                             | 30              | 3285bp          | 0.00%                  |
| tRNA:                               |       | 644             | 33897bp         | 0.00%                             | 662             | 40603bp         | 0.00%                             | 0               | 0bp             | 0.00%                  |
| -OTHER:                             |       | 644             | 33897bp         | 0.00%                             | 662             | 40603bp         | 0.00%                             | 0               | 0bp             | 0.00%                  |

**Table S25. Comparison of the proportion and detailed classification of detection results generated by three tools covering the repeat regions on the reference genome of Human(hg38).**

| LongRepMarker                                                                     |       |                 |                 | RepeatScout                                                                       |                 |                 | RepeatModeler2                                                                 |                 |                 |                        |
|-----------------------------------------------------------------------------------|-------|-----------------|-----------------|-----------------------------------------------------------------------------------|-----------------|-----------------|--------------------------------------------------------------------------------|-----------------|-----------------|------------------------|
| sequence: 455<br>total length: 3209286105bp<br>bases masked: 246167245 bp (7.67%) |       |                 |                 | sequence: 455<br>total length: 3209286105bp<br>bases masked: 115637763 bp (3.60%) |                 |                 | sequence: 455<br>total length: 3209286105bp<br>bases masked: 846785 bp (0.26%) |                 |                 |                        |
| Repeat                                                                            | Types | Num of elements | Length occupied | Percentage of sequence                                                            | Num of elements | Length occupied | Percentage of sequence                                                         | Num of elements | Length occupied | Percentage of sequence |
| DNA:                                                                              |       | 42345           | 5122539bp       | 0.16%                                                                             | 28858           | 4622136bp       | 0.14%                                                                          | 4291            | 759693bp        | 0.02%                  |
| -Academ-1:                                                                        |       | 197             | 120305bp        | 0.00%                                                                             | 133             | 178620bp        | 0.01%                                                                          | 0               | 0bp             | 0.00%                  |
| -CMC-EnSpm:                                                                       |       | 2049            | 179617bp        | 0.01%                                                                             | 126             | 27771bp         | 0.00%                                                                          | 0               | 0bp             | 0.00%                  |
| -Crypton-A:                                                                       |       | 25              | 5146bp          | 0.00%                                                                             | 0               | 0bp             | 0.00%                                                                          | 0               | 0bp             | 0.00%                  |
| -Crypton-H:                                                                       |       | 16              | 1216bp          | 0.00%                                                                             | 0               | 0bp             | 0.00%                                                                          | 0               | 0bp             | 0.00%                  |
| -Crypton-S:                                                                       |       | 5               | 2162bp          | 0.00%                                                                             | 0               | 0bp             | 0.00%                                                                          | 0               | 0bp             | 0.00%                  |
| -Crypton-V:                                                                       |       | 6               | 438bp           | 0.00%                                                                             | 35              | 14606bp         | 0.00%                                                                          | 0               | 0bp             | 0.00%                  |
| -Dada:                                                                            |       | 50              | 14384bp         | 0.00%                                                                             | 0               | 0bp             | 0.00%                                                                          | 0               | 0bp             | 0.00%                  |
| -Ginger:                                                                          |       | 138             | 13870bp         | 0.00%                                                                             | 0               | 0bp             | 0.00%                                                                          | 0               | 0bp             | 0.00%                  |
| -IS3EU:                                                                           |       | 18              | 4983bp          | 0.00%                                                                             | 0               | 0bp             | 0.00%                                                                          | 0               | 0bp             | 0.00%                  |
| -Kolobok:                                                                         |       | 77              | 14315bp         | 0.00%                                                                             | 0               | 0bp             | 0.00%                                                                          | 0               | 0bp             | 0.00%                  |
| -Kolobok-T2:                                                                      |       | 51              | 8646bp          | 0.00%                                                                             | 141             | 43242bp         | 0.00%                                                                          | 0               | 0bp             | 0.00%                  |
| -MULE-MuDR:                                                                       |       | 334             | 45856bp         | 0.00%                                                                             | 409             | 76115bp         | 0.00%                                                                          | 59              | 4252bp          | 0.00%                  |
| -MULE-NOF:                                                                        |       | 10              | 2764bp          | 0.00%                                                                             | 0               | 0bp             | 0.00%                                                                          | 0               | 0bp             | 0.00%                  |
| -Maverick:                                                                        |       | 58              | 7480bp          | 0.00%                                                                             | 0               | 0bp             | 0.00%                                                                          | 0               | 0bp             | 0.00%                  |
| -Merlin:                                                                          |       | 0               | 0bp             | 0.00%                                                                             | 1               | 41bp            | 0.00%                                                                          | 0               | 0bp             | 0.00%                  |
| -MuLE-MuDR:                                                                       |       | 16              | 802bp           | 0.00%                                                                             | 64              | 6936bp          | 0.00%                                                                          | 42              | 9822bp          | 0.00%                  |
| -MuLE-NOF:                                                                        |       | 9               | 950bp           | 0.00%                                                                             | 0               | 0bp             | 0.00%                                                                          | 0               | 0bp             | 0.00%                  |
| -Novosib:                                                                         |       | 26              | 8595bp          | 0.00%                                                                             | 0               | 0bp             | 0.00%                                                                          | 0               | 0bp             | 0.00%                  |
| -OTHER:                                                                           |       | 97              | 40966bp         | 0.00%                                                                             | 38              | 16849bp         | 0.00%                                                                          | 4               | 156bp           | 0.00%                  |
| -P:                                                                               |       | 10              | 841bp           | 0.00%                                                                             | 0               | 0bp             | 0.00%                                                                          | 0               | 0bp             | 0.00%                  |
| -PIF-Harbinger:                                                                   |       | 34              | 10053bp         | 0.00%                                                                             | 46              | 4239bp          | 0.00%                                                                          | 0               | 0bp             | 0.00%                  |
| -PIF-Spy:                                                                         |       | 4               | 226bp           | 0.00%                                                                             | 0               | 0bp             | 0.00%                                                                          | 0               | 0bp             | 0.00%                  |
| -PiggyBac:                                                                        |       | 681             | 40472bp         | 0.00%                                                                             | 518             | 41542bp         | 0.00%                                                                          | 53              | 10810bp         | 0.00%                  |
| -PiggyBac-X:                                                                      |       | 3               | 180bp           | 0.00%                                                                             | 16              | 2088bp          | 0.00%                                                                          | 0               | 0bp             | 0.00%                  |
| -Sola:                                                                            |       | 3               | 143bp           | 0.00%                                                                             | 0               | 0bp             | 0.00%                                                                          | 0               | 0bp             | 0.00%                  |
| -Sola-1:                                                                          |       | 12              | 394bp           | 0.00%                                                                             | 0               | 0bp             | 0.00%                                                                          | 0               | 0bp             | 0.00%                  |
| -Sola-2:                                                                          |       | 18              | 978bp           | 0.00%                                                                             | 0               | 0bp             | 0.00%                                                                          | 0               | 0bp             | 0.00%                  |
| -Sola-3:                                                                          |       | 29              | 10311bp         | 0.00%                                                                             | 32              | 3038bp          | 0.00%                                                                          | 0               | 0bp             | 0.00%                  |
| -TcMar-Fot1:                                                                      |       | 14              | 2050bp          | 0.00%                                                                             | 9               | 948bp           | 0.00%                                                                          | 0               | 0bp             | 0.00%                  |
| -TcMar-ISRm11:                                                                    |       | 24              | 6061bp          | 0.00%                                                                             | 0               | 0bp             | 0.00%                                                                          | 0               | 0bp             | 0.00%                  |
| -TcMar-Mariner:                                                                   |       | 4232            | 243778bp        | 0.01%                                                                             | 713             | 187883bp        | 0.01%                                                                          | 78              | 16514bp         | 0.00%                  |
| -TcMar-Tc1:                                                                       |       | 51              | 24889bp         | 0.00%                                                                             | 36              | 38040bp         | 0.00%                                                                          | 1               | 332bp           | 0.00%                  |
| -TcMar-Tc2:                                                                       |       | 74              | 9687bp          | 0.00%                                                                             | 172             | 40049bp         | 0.00%                                                                          | 10              | 1015bp          | 0.00%                  |
| -TcMar-Tigger:                                                                    |       | 25728           | 1744247bp       | 0.05%                                                                             | 13632           | 1818789bp       | 0.06%                                                                          | 2062            | 494046bp        | 0.02%                  |
| -Zisupton:                                                                        |       | 313             | 195919bp        | 0.01%                                                                             | 62              | 15979bp         | 0.00%                                                                          | 0               | 0bp             | 0.00%                  |
| -hAT:                                                                             |       | 35              | 21304bp         | 0.00%                                                                             | 37              | 1964bp          | 0.00%                                                                          | 3               | 415bp           | 0.00%                  |
| -hAT-Ac:                                                                          |       | 68              | 25503bp         | 0.00%                                                                             | 50              | 128670bp        | 0.00%                                                                          | 4               | 941bp           | 0.00%                  |
| -hAT-Blackjack:                                                                   |       | 168             | 26762bp         | 0.00%                                                                             | 452             | 40453bp         | 0.00%                                                                          | 109             | 9503bp          | 0.00%                  |
| -hAT-Charlie:                                                                     |       | 6922            | 1939181bp       | 0.06%                                                                             | 10910           | 1446177bp       | 0.05%                                                                          | 1659            | 184073bp        | 0.01%                  |
| -hAT-Pegasus:                                                                     |       | 8               | 353bp           | 0.00%                                                                             | 0               | 0bp             | 0.00%                                                                          | 0               | 0bp             | 0.00%                  |
| -hAT-Tag1:                                                                        |       | 20              | 17131bp         | 0.00%                                                                             | 14              | 14793bp         | 0.00%                                                                          | 0               | 0bp             | 0.00%                  |
| -hAT-Tip100:                                                                      |       | 702             | 357294bp        | 0.01%                                                                             | 1212            | 485752bp        | 0.02%                                                                          | 207             | 27991bp         | 0.00%                  |
| -hAT-Tip100?:                                                                     |       | 4               | 1312bp          | 0.00%                                                                             | 0               | 0bp             | 0.00%                                                                          | 0               | 0bp             | 0.00%                  |
| -hAT-hATm:                                                                        |       | 6               | 2414bp          | 0.00%                                                                             | 0               | 0bp             | 0.00%                                                                          | 0               | 0bp             | 0.00%                  |
| DNA?:                                                                             |       | 0               | 0bp             | 0.00%                                                                             | 15              | 2951bp          | 0.00%                                                                          | 0               | 0bp             | 0.00%                  |
| -hAT-Tip100:                                                                      |       | 0               | 0bp             | 0.00%                                                                             | 15              | 2951bp          | 0.00%                                                                          | 0               | 0bp             | 0.00%                  |
| LINE:                                                                             |       | 253482          | 116091245bp     | 3.62%                                                                             | 91505           | 40916219bp      | 1.27%                                                                          | 9309            | 4076749bp       | 0.13%                  |
| -CR1:                                                                             |       | 307             | 211040bp        | 0.01%                                                                             | 3030            | 229534bp        | 0.01%                                                                          | 8               | 1211bp          | 0.00%                  |
| -CRE:                                                                             |       | 8               | 6604bp          | 0.00%                                                                             | 0               | 0bp             | 0.00%                                                                          | 0               | 0bp             | 0.00%                  |
| -I:                                                                               |       | 22              | 15578bp         | 0.00%                                                                             | 45              | 105043bp        | 0.00%                                                                          | 0               | 0bp             | 0.00%                  |
| -I-Jockey:                                                                        |       | 8               | 373bp           | 0.00%                                                                             | 33              | 9887bp          | 0.00%                                                                          | 0               | 0bp             | 0.00%                  |
| -I-Nimb:                                                                          |       | 0               | 0bp             | 0.00%                                                                             | 6               | 870bp           | 0.00%                                                                          | 0               | 0bp             | 0.00%                  |
| -Jockey:                                                                          |       | 8               | 749bp           | 0.00%                                                                             | 0               | 0bp             | 0.00%                                                                          | 0               | 0bp             | 0.00%                  |
| -L1:                                                                              |       | 249969          | 113923085bp     | 3.55%                                                                             | 87289           | 39160105bp      | 1.22%                                                                          | 9124            | 4042496bp       | 0.13%                  |
| -L1-Tx1:                                                                          |       | 78              | 27322bp         | 0.00%                                                                             | 109             | 26170bp         | 0.00%                                                                          | 0               | 0bp             | 0.00%                  |
| -L2:                                                                              |       | 2597            | 1413646bp       | 0.04%                                                                             | 3300            | 1277255bp       | 0.04%                                                                          | 149             | 18423bp         | 0.00%                  |
| -OTHER:                                                                           |       | 134             | 1938577bp       | 0.06%                                                                             | 95              | 175321bp        | 0.01%                                                                          | 0               | 0bp             | 0.00%                  |
| -Penelope:                                                                        |       | 18              | 4355bp          | 0.00%                                                                             | 6               | 10617bp         | 0.00%                                                                          | 0               | 0bp             | 0.00%                  |
| -R1:                                                                              |       | 75              | 49254bp         | 0.00%                                                                             | 19              | 10667bp         | 0.00%                                                                          | 0               | 0bp             | 0.00%                  |
| -R1-LOA:                                                                          |       | 4               | 1556bp          | 0.00%                                                                             | 0               | 0bp             | 0.00%                                                                          | 0               | 0bp             | 0.00%                  |
| -R2:                                                                              |       | 37              | 15809bp         | 0.00%                                                                             | 0               | 0bp             | 0.00%                                                                          | 0               | 0bp             | 0.00%                  |
| -R2-Hero:                                                                         |       | 0               | 0bp             | 0.00%                                                                             | 8               | 1394bp          | 0.00%                                                                          | 0               | 0bp             | 0.00%                  |
| -R2-NeSL:                                                                         |       | 0               | 0bp             | 0.00%                                                                             | 0               | 0bp             | 0.00%                                                                          | 12              | 8287bp          | 0.00%                  |
| -RTE-BovB:                                                                        |       | 137             | 33397bp         | 0.00%                                                                             | 204             | 81103bp         | 0.00%                                                                          | 13              | 6010bp          | 0.00%                  |
| -RTE-X:                                                                           |       | 68              | 25859bp         | 0.00%                                                                             | 88              | 30551bp         | 0.00%                                                                          | 3               | 322bp           | 0.00%                  |
| -Rex-Babar:                                                                       |       | 12              | 2544bp          | 0.00%                                                                             | 0               | 0bp             | 0.00%                                                                          | 0               | 0bp             | 0.00%                  |
| LTR:                                                                              |       | 233948          | 21644832bp      | 0.67%                                                                             | 142609          | 20851756bp      | 0.65%                                                                          | 12774           | 2398409bp       | 0.07%                  |
| -Caulimovirus:                                                                    |       | 15              | 3159bp          | 0.00%                                                                             | 0               | 0bp             | 0.00%                                                                          | 0               | 0bp             | 0.00%                  |
| -Copia:                                                                           |       | 274             | 82430bp         | 0.00%                                                                             | 281             | 68939bp         | 0.00%                                                                          | 17              | 14913bp         | 0.00%                  |
| -DIRS:                                                                            |       | 83              | 84934bp         | 0.00%                                                                             | 30              | 8379bp          | 0.00%                                                                          | 0               | 0bp             | 0.00%                  |
| -ERV:                                                                             |       | 51              | 9043bp          | 0.00%                                                                             | 166             | 103236bp        | 0.00%                                                                          | 0               | 0bp             | 0.00%                  |
| -ERV1:                                                                            |       | 137547          | 9924078bp       | 0.31%                                                                             | 66494           | 10267624bp      | 0.32%                                                                          | 6493            | 1390674bp       | 0.04%                  |
| -ERV4:                                                                            |       | 12              | 13385bp         | 0.00%                                                                             | 0               | 0bp             | 0.00%                                                                          | 0               | 0bp             | 0.00%                  |
| -ERVK:                                                                            |       | 27750           | 3174763bp       | 0.10%                                                                             | 9972            | 3052567bp       | 0.10%                                                                          | 1316            | 502784bp        | 0.02%                  |
| -ERVL:                                                                            |       | 30329           | 4440975bp       | 0.14%                                                                             | 19263           | 3886403bp       | 0.12%                                                                          | 1839            | 287348bp        | 0.01%                  |
| -ERVL-MaLR:                                                                       |       | 36245           | 3745971bp       | 0.12%                                                                             | 45557           | 3789981bp       | 0.12%                                                                          | 3108            | 204839bp        | 0.01%                  |
| -Gypsy:                                                                           |       | 1427            | 430273bp        | 0.01%                                                                             | 445             | 143225bp        | 0.00%                                                                          | 0               | 0bp             | 0.00%                  |
| -Ngaro:                                                                           |       | 18              | 7415bp          | 0.00%                                                                             | 233             | 13345bp         | 0.00%                                                                          | 0               | 0bp             | 0.00%                  |
| -OTHER:                                                                           |       | 139             | 22011bp         | 0.00%                                                                             | 125             | 37855bp         | 0.00%                                                                          | 1               | 30bp            | 0.00%                  |
| -Pao:                                                                             |       | 50              | 9434bp          | 0.00%                                                                             | 31              | 5272bp          | 0.00%                                                                          | 0               | 0bp             | 0.00%                  |
| -Viper:                                                                           |       | 8               | 768bp           | 0.00%                                                                             | 12              | 1624bp          | 0.00%                                                                          | 0               | 0bp             | 0.00%                  |
| Other:                                                                            |       | 31              | 4060bp          | 0.00%                                                                             | 0               | 0bp             | 0.00%                                                                          | 0               | 0bp             | 0.00%                  |
| -OTHER:                                                                           |       | 27              | 1457bp          | 0.00%                                                                             | 0               | 0bp             | 0.00%                                                                          | 0               | 0bp             | 0.00%                  |
| -subtelomeric:                                                                    |       | 4               | 2603bp          | 0.00%                                                                             | 0               | 0bp             | 0.00%                                                                          | 0               | 0bp             | 0.00%                  |
| RC:                                                                               |       | 232             | 66283bp         | 0.00%                                                                             | 45              | 15199bp         | 0.00%                                                                          | 0               | 0bp             | 0.00%                  |
| -Helitron:                                                                        |       | 232             | 66283bp         | 0.00%                                                                             | 45              | 15199bp         | 0.00%                                                                          | 0               | 0bp             | 0.00%                  |
| RC?:                                                                              |       | 0               | 0bp             | 0.00%                                                                             | 29              | 2460bp          | 0.00%                                                                          | 0               | 0bp             | 0.00%                  |
| -Helitron:                                                                        |       | 0               | 0bp             | 0.00%                                                                             | 29              | 2460bp          | 0.00%                                                                          | 0               | 0bp             | 0.00%                  |
| RNA:                                                                              |       | 59              | 2808bp          | 0.00%                                                                             | 77              | 4050bp          | 0.00%                                                                          | 12              | 1584bp          | 0.00%                  |
| -OTHER:                                                                           |       | 59              | 2808bp          | 0.00%                                                                             | 77              | 4050bp          | 0.00%                                                                          | 12              | 1584bp          | 0.00%                  |
| Retroposon:                                                                       |       | 3377            | 1270842bp       | 0.04%                                                                             | 526             | 308116bp        | 0.01%                                                                          | 97              | 3762bp          | 0.00%                  |
| -SVA:                                                                             |       | 3377            | 1270842bp       | 0.04%                                                                             | 526             | 308116bp        | 0.01%                                                                          | 97              | 3762bp          | 0.00%                  |
| SINE:                                                                             |       | 129729          | 75310083bp      | 2.35%                                                                             | 319830          | 51254750bp      | 1.60%                                                                          | 5728            | 530547bp        | 0.02%                  |
| -S:                                                                               |       | 89              | 26210bp         | 0.00%                                                                             | 112             | 6575bp          | 0.00%                                                                          | 35              | 2327bp          | 0.00%                  |
| -S-Deu-L2:                                                                        |       | 0               | 0bp             | 0.00%                                                                             | 6               | 657bp           | 0.00%                                                                          | 0               | 0bp             | 0.00%                  |
| -S-Sauria-RTE:                                                                    |       | 0               | 0bp             | 0.00%                                                                             | 11              | 2942bp          | 0.00%                                                                          | 0               | 0bp             | 0.00%                  |
| -Alu:                                                                             |       | 126088          | 74205313bp      | 2.31%                                                                             | 314932          | 50079001bp      | 1.56%                                                                          | 5307            | 433360bp        | 0.01%                  |
| -ID:                                                                              |       | 0               | 0bp             | 0.00%                                                                             | 101             | 7308bp          | 0.00%                                                                          | 0               | 0bp             | 0.00%                  |
| -MIR:                                                                             |       | 3456            | 1439502bp       | 0.04%                                                                             | 4520            | 1625596bp       | 0.05%                                                                          | 371             | 94663bp         | 0.00%                  |
| -U:                                                                               |       | 62              | 14456bp         | 0.00%                                                                             | 82              | 25826bp         | 0.00%                                                                          | 15              | 552bp           | 0.00%                  |
| -tRNA:                                                                            |       | 0               | 0bp             | 0.00%                                                                             | 8               | 1428bp          | 0.00%                                                                          | 0               | 0bp             | 0.00%                  |
| -tRNA-7SL:                                                                        |       | 16              | 1411bp          | 0.00%                                                                             | 0               | 0bp             | 0.00%                                                                          | 0               | 0bp             | 0.00%                  |
| -tRNA-Core-L2:                                                                    |       | 4               | 184bp           | 0.00%                                                                             | 16              | 2392bp          | 0.00%                                                                          | 0               | 0bp             | 0.00%                  |
| -tRNA-Core-RTE:                                                                   |       | 0               | 0bp             | 0.00%                                                                             | 13              | 680bp           | 0.00%                                                                          | 0               | 0bp             | 0.00%                  |
| -tRNA-Meta:                                                                       |       | 10              | 1898bp          | 0.00%                                                                             | 0               | 0bp             | 0.00%                                                                          | 0               | 0bp             | 0.00%                  |
| -tRNA-RTE:                                                                        |       | 4               | 179bp           | 0.00%                                                                             | 29              | 7788bp          | 0.00%                                                                          | 0               | 0bp             | 0.00%                  |
| SINE?:                                                                            |       | 16              | 21177bp         | 0.00%                                                                             | 15              | 16871bp         | 0.00%                                                                          | 0               | 0bp             | 0.00%                  |
| -OTHER:                                                                           |       | 16              | 21177bp         | 0.00%                                                                             | 15              | 16871bp         | 0.00%                                                                          | 0               | 0bp             | 0.00%                  |
| Satellite:                                                                        |       | 1339490         | 51375051bp      | 1.60%                                                                             | 2623            | 921845bp        | 0.03%                                                                          | 350             | 102667bp        | 0.00%                  |
| -OTHER:                                                                           |       | 8157            | 1392631bp       | 0.04%                                                                             | 1061            | 454086bp        | 0.01%                                                                          | 143             | 52327bp         | 0.00%                  |
| -Y-chromosome:                                                                    |       | 321517          | 24008707bp      | 0.75%                                                                             | 93              | 30431bp         | 0.00%                                                                          | 56              | 6113bp          | 0.00%                  |
| -acromeric:                                                                       |       | 203             | 91137bp         | 0.00%                                                                             | 467             | 143680bp        | 0.00%                                                                          | 0               | 0bp             | 0.00%                  |
| -centromeric:                                                                     |       | 1008827         | 43052149bp      | 1.34%                                                                             | 588             | 253744bp        | 0.01%                                                                          | 151             | 44227bp         | 0.00%                  |
| -telomeric:                                                                       |       | 786             | 192714bp        | 0.01%                                                                             | 414             | 60934bp         | 0.00%                                                                          | 0               | 0bp             | 0.00%                  |
| Simple:                                                                           |       | 19483           | 1534323bp       | 0.05%                                                                             | 434             | 109413bp        | 0.00%                                                                          | 199             | 12847bp         | 0.00%                  |
| -repeat:                                                                          |       | 19483           | 1534323bp       | 0.05%                                                                             | 434             | 109413bp        | 0.00%                                                                          | 199             | 12847bp         | 0.00%                  |
| Unknown:                                                                          |       | 158348          | 38949784bp      | 1.21%                                                                             | 87921           | 19053503bp      | 0.59%                                                                          | 1103            | 567000bp        | 0.02%                  |
| -OTHER:                                                                           |       | 158348          | 38949784bp      | 1.21%                                                                             | 87921           | 19053503bp      | 0.59%                                                                          | 1103            | 567000bp        | 0.02%                  |
| rRNA:                                                                             |       | 256             | 98971bp         | 0.00%                                                                             | 460             | 62804bp         | 0.00%                                                                          | 0               | 0bp             | 0.00%                  |
| -OTHER:                                                                           |       | 256             | 98971bp         | 0.00%                                                                             | 460             | 62804bp         | 0.00%                                                                          | 0               | 0bp             | 0.00%                  |
| scRNA:                                                                            |       | 35              | 3213bp          | 0.00%                                                                             | 247             | 22162bp         | 0.00%                                                                          | 16              | 1016bp          | 0.00%                  |
| -OTHER:                                                                           |       | 35              | 3213bp          | 0.00%                                                                             | 247             | 22162bp         | 0.00%                                                                          | 16              | 1016bp          | 0.00%                  |
| snRNA:                                                                            |       | 140             | 46208bp         | 0.00%                                                                             | 329             | 24052bp         | 0.00%                                                                          | 39              | 2378bp          | 0.00%                  |
| -OTHER:                                                                           |       | 140             | 46208bp         | 0.00%                                                                             | 329             | 24052bp         | 0.00%                                                                          | 39              | 2378bp          | 0.00%                  |
| tRNA:                                                                             |       | 235             | 19643bp         | 0.00%                                                                             | 498             | 54895bp         |                                                                                |                 |                 |                        |

Table S26. Comparison of the proportion and detailed classification of detection results generated by three tools covering the repeat regions on the reference genome of Mouse.

| LongRepMarker                      |                 |                 |                        | RepeatScout                        |                 |                        | RepeatModeler2                    |                 |                        |
|------------------------------------|-----------------|-----------------|------------------------|------------------------------------|-----------------|------------------------|-----------------------------------|-----------------|------------------------|
| sequence: 239                      |                 |                 |                        | sequence: 239                      |                 |                        | sequence: 239                     |                 |                        |
| total length: 2818974548bp         |                 |                 |                        | total length: 2818974548bp         |                 |                        | total length: 2818974548bp        |                 |                        |
| bases masked: 260838424 bp (9.25%) |                 |                 |                        | bases masked: 127719817 bp (4.53%) |                 |                        | bases masked: 28407842 bp (1.01%) |                 |                        |
| Repeat Types                       | Num of elements | Length occupied | Percentage of sequence | Num of elements                    | Length occupied | Percentage of sequence | Num of elements                   | Length occupied | Percentage of sequence |
| <b>DNA:</b>                        | 12442           | 2962978bp       | 0.11%                  | 8860                               | 1567808bp       | 0.06%                  | 1038                              | 285958bp        | 0.01%                  |
| -Academ:                           | 36              | 2694bp          | 0.00%                  | 39                                 | 4198bp          | 0.00%                  | 0                                 | 0bp             | 0.00%                  |
| -CMC-Chapaev:                      | 18              | 1331bp          | 0.00%                  | 0                                  | 0bp             | 0.00%                  | 0                                 | 0bp             | 0.00%                  |
| -CMC-Chapaev-3:                    | 0               | 0bp             | 0.00%                  | 16                                 | 2900bp          | 0.00%                  | 0                                 | 0bp             | 0.00%                  |
| -CMC-EnSpm:                        | 1327            | 324764bp        | 0.01%                  | 225                                | 98766bp         | 0.00%                  | 0                                 | 0bp             | 0.00%                  |
| -Crypton:                          | 3               | 7046bp          | 0.00%                  | 33                                 | 12389bp         | 0.00%                  | 0                                 | 0bp             | 0.00%                  |
| -Crypton-A:                        | 8               | 2275bp          | 0.00%                  | 0                                  | 0bp             | 0.00%                  | 0                                 | 0bp             | 0.00%                  |
| -Crypton-F:                        | 4               | 556bp           | 0.00%                  | 0                                  | 0bp             | 0.00%                  | 0                                 | 0bp             | 0.00%                  |
| -Crypton-H:                        | 31              | 2916bp          | 0.00%                  | 0                                  | 0bp             | 0.00%                  | 0                                 | 0bp             | 0.00%                  |
| -Crypton-S:                        | 24              | 1936bp          | 0.00%                  | 0                                  | 0bp             | 0.00%                  | 0                                 | 0bp             | 0.00%                  |
| -Crypton-V:                        | 93              | 21394bp         | 0.00%                  | 0                                  | 0bp             | 0.00%                  | 0                                 | 0bp             | 0.00%                  |
| -Dada:                             | 88              | 8493bp          | 0.00%                  | 16                                 | 1812bp          | 0.00%                  | 0                                 | 0bp             | 0.00%                  |
| -Ginger:                           | 187             | 32591bp         | 0.00%                  | 56                                 | 15635bp         | 0.00%                  | 0                                 | 0bp             | 0.00%                  |
| -IS3EU:                            | 88              | 17399bp         | 0.00%                  | 36                                 | 8126bp          | 0.00%                  | 0                                 | 0bp             | 0.00%                  |
| -Kolobok-Hydra:                    | 6               | 10035bp         | 0.00%                  | 29                                 | 4557bp          | 0.00%                  | 0                                 | 0bp             | 0.00%                  |
| -Kolobok-T2:                       | 322             | 40466bp         | 0.00%                  | 12                                 | 3750bp          | 0.00%                  | 0                                 | 0bp             | 0.00%                  |
| -MULE:                             | 12              | 1097bp          | 0.00%                  | 0                                  | 0bp             | 0.00%                  | 0                                 | 0bp             | 0.00%                  |
| -MULE-MuDR:                        | 252             | 54222bp         | 0.00%                  | 219                                | 31970bp         | 0.00%                  | 19                                | 8432bp          | 0.00%                  |
| -MULE-NOF:                         | 4               | 3892bp          | 0.00%                  | 0                                  | 0bp             | 0.00%                  | 0                                 | 0bp             | 0.00%                  |
| -Maverick:                         | 92              | 14315bp         | 0.00%                  | 93                                 | 24063bp         | 0.00%                  | 0                                 | 0bp             | 0.00%                  |
| -MuLE-MuDR:                        | 48              | 5816bp          | 0.00%                  | 35                                 | 4343bp          | 0.00%                  | 0                                 | 0bp             | 0.00%                  |
| -MuLE-NOF:                         | 8               | 249bp           | 0.00%                  | 0                                  | 0bp             | 0.00%                  | 0                                 | 0bp             | 0.00%                  |
| -MuLE-NOF?:                        | 5               | 434bp           | 0.00%                  | 0                                  | 0bp             | 0.00%                  | 0                                 | 0bp             | 0.00%                  |
| -Novosib:                          | 37              | 7666bp          | 0.00%                  | 0                                  | 0bp             | 0.00%                  | 0                                 | 0bp             | 0.00%                  |
| -OTHER:                            | 475             | 89064bp         | 0.00%                  | 87                                 | 117282bp        | 0.00%                  | 0                                 | 0bp             | 0.00%                  |
| -P:                                | 7               | 146bp           | 0.00%                  | 0                                  | 0bp             | 0.00%                  | 0                                 | 0bp             | 0.00%                  |
| -PIF-Harbinger:                    | 179             | 24980bp         | 0.00%                  | 117                                | 28806bp         | 0.00%                  | 0                                 | 0bp             | 0.00%                  |
| -PIF-ISL2EU:                       | 61              | 5336bp          | 0.00%                  | 0                                  | 0bp             | 0.00%                  | 0                                 | 0bp             | 0.00%                  |
| -PiggyBac:                         | 23              | 17800bp         | 0.00%                  | 66                                 | 23944bp         | 0.00%                  | 0                                 | 0bp             | 0.00%                  |
| -PiggyBac-X:                       | 0               | 0bp             | 0.00%                  | 11                                 | 1482bp          | 0.00%                  | 0                                 | 0bp             | 0.00%                  |
| -Sola-1:                           | 28              | 1870bp          | 0.00%                  | 0                                  | 0bp             | 0.00%                  | 0                                 | 0bp             | 0.00%                  |
| -Sola-2:                           | 13              | 8115bp          | 0.00%                  | 14                                 | 3446bp          | 0.00%                  | 0                                 | 0bp             | 0.00%                  |
| -Sola-3:                           | 56              | 10163bp         | 0.00%                  | 14                                 | 2876bp          | 0.00%                  | 0                                 | 0bp             | 0.00%                  |
| -TcMar-Ant1:                       | 0               | 0bp             | 0.00%                  | 8                                  | 1080bp          | 0.00%                  | 0                                 | 0bp             | 0.00%                  |
| -TcMar-IS885:                      | 4               | 718bp           | 0.00%                  | 0                                  | 0bp             | 0.00%                  | 0                                 | 0bp             | 0.00%                  |
| -TcMar-ISRm11:                     | 23              | 4096bp          | 0.00%                  | 12                                 | 4352bp          | 0.00%                  | 0                                 | 0bp             | 0.00%                  |
| -TcMar-Mariner:                    | 33              | 8551bp          | 0.00%                  | 0                                  | 0bp             | 0.00%                  | 0                                 | 0bp             | 0.00%                  |
| -TcMar-Sagan:                      | 4               | 227bp           | 0.00%                  | 0                                  | 0bp             | 0.00%                  | 0                                 | 0bp             | 0.00%                  |
| -TcMar-Tc1:                        | 188             | 44269bp         | 0.00%                  | 0                                  | 0bp             | 0.00%                  | 0                                 | 0bp             | 0.00%                  |
| -TcMar-Tc2:                        | 21              | 6560bp          | 0.00%                  | 24                                 | 4696bp          | 0.00%                  | 0                                 | 0bp             | 0.00%                  |
| -TcMar-Tigger:                     | 1762            | 293909bp        | 0.01%                  | 265                                | 52357bp         | 0.00%                  | 33                                | 2675bp          | 0.00%                  |
| -Zisupton:                         | 164             | 35683bp         | 0.00%                  | 42                                 | 9898bp          | 0.00%                  | 0                                 | 0bp             | 0.00%                  |
| -hAT:                              | 118             | 10626bp         | 0.00%                  | 0                                  | 0bp             | 0.00%                  | 5                                 | 345bp           | 0.00%                  |
| -hAT-Ac:                           | 286             | 381717bp        | 0.01%                  | 184                                | 93383bp         | 0.00%                  | 0                                 | 0bp             | 0.00%                  |
| -hAT-Blackjack:                    | 54              | 5169bp          | 0.00%                  | 0                                  | 0bp             | 0.00%                  | 0                                 | 0bp             | 0.00%                  |
| -hAT-Charlie:                      | 5970            | 1415986bp       | 0.05%                  | 7025                               | 965773bp        | 0.03%                  | 944                               | 229709bp        | 0.01%                  |
| -hAT-Tag1:                         | 16              | 2181bp          | 0.00%                  | 72                                 | 18044bp         | 0.00%                  | 37                                | 44797bp         | 0.00%                  |
| -hAT-Tip100:                       | 195             | 67198bp         | 0.00%                  | 110                                | 48745bp         | 0.00%                  | 0                                 | 0bp             | 0.00%                  |
| -hAT-hATw:                         | 69              | 6239bp          | 0.00%                  | 0                                  | 0bp             | 0.00%                  | 0                                 | 0bp             | 0.00%                  |
| <b>LINE:</b>                       | 575223          | 130879619bp     | 4.64%                  | 72870                              | 61339201bp      | 2.18%                  | 13799                             | 10891520bp      | 0.39%                  |
| -CR1:                              | 84              | 94797bp         | 0.00%                  | 17                                 | 61029bp         | 0.00%                  | 0                                 | 0bp             | 0.00%                  |
| -CRE-Ambal:                        | 11              | 6172bp          | 0.00%                  | 28                                 | 5980bp          | 0.00%                  | 0                                 | 0bp             | 0.00%                  |
| -I:                                | 39              | 66907bp         | 0.00%                  | 154                                | 136938bp        | 0.00%                  | 0                                 | 0bp             | 0.00%                  |
| -I-Jockey:                         | 132             | 47906bp         | 0.00%                  | 74                                 | 14780bp         | 0.00%                  | 0                                 | 0bp             | 0.00%                  |
| -Jockey:                           | 17              | 2700bp          | 0.00%                  | 0                                  | 0bp             | 0.00%                  | 0                                 | 0bp             | 0.00%                  |
| -L1:                               | 573389          | 130388803bp     | 4.63%                  | 71301                              | 60840527bp      | 2.16%                  | 13764                             | 10850626bp      | 0.38%                  |
| -L1-Tx1:                           | 175             | 80576bp         | 0.00%                  | 40                                 | 111835bp        | 0.00%                  | 0                                 | 0bp             | 0.00%                  |
| -L2:                               | 476             | 102990bp        | 0.00%                  | 371                                | 70192bp         | 0.00%                  | 5                                 | 982bp           | 0.00%                  |
| -LOA:                              | 3               | 253bp           | 0.00%                  | 0                                  | 0bp             | 0.00%                  | 0                                 | 0bp             | 0.00%                  |
| -OTHER:                            | 15              | 46447bp         | 0.00%                  | 0                                  | 0bp             | 0.00%                  | 0                                 | 0bp             | 0.00%                  |
| -Penelope:                         | 48              | 14272bp         | 0.00%                  | 0                                  | 0bp             | 0.00%                  | 24                                | 36831bp         | 0.00%                  |
| -R1:                               | 79              | 28939bp         | 0.00%                  | 31                                 | 8611bp          | 0.00%                  | 0                                 | 0bp             | 0.00%                  |
| -R2:                               | 62              | 48509bp         | 0.00%                  | 21                                 | 10650bp         | 0.00%                  | 0                                 | 0bp             | 0.00%                  |
| -R2-NeSL:                          | 8               | 2836bp          | 0.00%                  | 0                                  | 0bp             | 0.00%                  | 0                                 | 0bp             | 0.00%                  |
| -RTE-BovB:                         | 607             | 155230bp        | 0.01%                  | 829                                | 249314bp        | 0.01%                  | 6                                 | 3081bp          | 0.00%                  |
| -RTE-RTE:                          | 8               | 2433bp          | 0.00%                  | 0                                  | 0bp             | 0.00%                  | 0                                 | 0bp             | 0.00%                  |
| -RTE-X:                            | 66              | 12053bp         | 0.00%                  | 4                                  | 350bp           | 0.00%                  | 0                                 | 0bp             | 0.00%                  |
| -Rex-Babar:                        | 4               | 938bp           | 0.00%                  | 0                                  | 0bp             | 0.00%                  | 0                                 | 0bp             | 0.00%                  |
| <b>LTR:</b>                        | 522898          | 9786508bp       | 2.82%                  | 128730                             | 40705662bp      | 1.44%                  | 29905                             | 11851534bp      | 0.42%                  |
| -Caulimovirus:                     | 82              | 13899bp         | 0.00%                  | 0                                  | 0bp             | 0.00%                  | 0                                 | 0bp             | 0.00%                  |
| -Copia:                            | 991             | 277753bp        | 0.01%                  | 363                                | 139928bp        | 0.00%                  | 24                                | 8425bp          | 0.00%                  |
| -DIRS:                             | 86              | 23958bp         | 0.00%                  | 82                                 | 25787bp         | 0.00%                  | 0                                 | 0bp             | 0.00%                  |
| -ERV:                              | 749             | 1443253bp       | 0.05%                  | 204                                | 2275532bp       | 0.08%                  | 0                                 | 0bp             | 0.00%                  |
| -ERV1:                             | 122353          | 16628052bp      | 0.59%                  | 18435                              | 7550772bp       | 0.27%                  | 3877                              | 1590035bp       | 0.06%                  |
| -ERV4:                             | 0               | 0bp             | 0.00%                  | 45                                 | 6877bp          | 0.00%                  | 0                                 | 0bp             | 0.00%                  |
| -ERVK:                             | 282465          | 43357961bp      | 1.54%                  | 77413                              | 21616510bp      | 0.77%                  | 17748                             | 5091469bp       | 0.18%                  |
| -ERVL:                             | 25836           | 8286233bp       | 0.29%                  | 7345                               | 3311531bp       | 0.12%                  | 2718                              | 2516274bp       | 0.09%                  |
| -ERVL-MaLR:                        | 86571           | 12498839bp      | 0.44%                  | 23827                              | 6837893bp       | 0.24%                  | 5487                              | 2643985bp       | 0.09%                  |
| -Gypsy:                            | 3149            | 591138bp        | 0.02%                  | 901                                | 354197bp        | 0.01%                  | 46                                | 34264bp         | 0.00%                  |
| -Lenti:                            | 19              | 842bp           | 0.00%                  | 0                                  | 0bp             | 0.00%                  | 0                                 | 0bp             | 0.00%                  |
| -Ngaro:                            | 19              | 2384bp          | 0.00%                  | 0                                  | 0bp             | 0.00%                  | 0                                 | 0bp             | 0.00%                  |
| -OTHER:                            | 119             | 26437bp         | 0.00%                  | 22                                 | 5674bp          | 0.00%                  | 5                                 | 3608bp          | 0.00%                  |
| -Pao:                              | 429             | 114264bp        | 0.00%                  | 93                                 | 14168bp         | 0.00%                  | 0                                 | 0bp             | 0.00%                  |
| -Viper:                            | 30              | 6470bp          | 0.00%                  | 0                                  | 0bp             | 0.00%                  | 0                                 | 0bp             | 0.00%                  |
| <b>Other:</b>                      | 4696            | 698096bp        | 0.02%                  | 2221                               | 159797bp        | 0.01%                  | 367                               | 27887bp         | 0.00%                  |
| -OTHER:                            | 4696            | 698096bp        | 0.02%                  | 2221                               | 159797bp        | 0.01%                  | 367                               | 27887bp         | 0.00%                  |
| <b>RC:</b>                         | 385             | 46054bp         | 0.00%                  | 107                                | 43070bp         | 0.00%                  | 36                                | 1808bp          | 0.00%                  |
| -Helitron:                         | 385             | 46054bp         | 0.00%                  | 107                                | 43070bp         | 0.00%                  | 36                                | 1808bp          | 0.00%                  |
| <b>RNA:</b>                        | 0               | 0bp             | 0.00%                  | 25                                 | 881bp           | 0.00%                  | 8                                 | 897bp           | 0.00%                  |
| -OTHER:                            | 0               | 0bp             | 0.00%                  | 25                                 | 881bp           | 0.00%                  | 8                                 | 897bp           | 0.00%                  |
| <b>Retroposon:</b>                 | 10              | 1577bp          | 0.00%                  | 0                                  | 0bp             | 0.00%                  | 0                                 | 0bp             | 0.00%                  |
| -L1:                               | 6               | 563bp           | 0.00%                  | 0                                  | 0bp             | 0.00%                  | 0                                 | 0bp             | 0.00%                  |
| -SVA:                              | 4               | 1014bp          | 0.00%                  | 0                                  | 0bp             | 0.00%                  | 0                                 | 0bp             | 0.00%                  |
| <b>SINE:</b>                       | 99855           | 33312607bp      | 1.18%                  | 61225                              | 19846695bp      | 0.70%                  | 10918                             | 3649881bp       | 0.13%                  |
| -S5:                               | 208             | 23801bp         | 0.00%                  | 60                                 | 3994bp          | 0.00%                  | 45                                | 3159bp          | 0.00%                  |
| -S5-Deu-L2:                        | 3               | 1522bp          | 0.00%                  | 9                                  | 3436bp          | 0.00%                  | 0                                 | 0bp             | 0.00%                  |
| -7SL:                              | 98              | 31742bp         | 0.00%                  | 27                                 | 1464bp          | 0.00%                  | 0                                 | 0bp             | 0.00%                  |
| -Alu:                              | 61154           | 26362743bp      | 0.94%                  | 29656                              | 13942791bp      | 0.49%                  | 7988                              | 1918217bp       | 0.07%                  |
| -B2:                               | 29260           | 6335683bp       | 0.22%                  | 24861                              | 5386533bp       | 0.19%                  | 2363                              | 1469013bp       | 0.05%                  |
| -B4:                               | 7230            | 1633364bp       | 0.06%                  | 4652                               | 1059477bp       | 0.04%                  | 311                               | 250062bp        | 0.01%                  |
| -ID:                               | 1400            | 567613bp        | 0.02%                  | 1269                               | 294968bp        | 0.01%                  | 165                               | 6833bp          | 0.00%                  |
| -MIR:                              | 382             | 155299bp        | 0.01%                  | 452                                | 150017bp        | 0.01%                  | 24                                | 1771bp          | 0.00%                  |
| -U:                                | 80              | 7672bp          | 0.00%                  | 203                                | 6863bp          | 0.00%                  | 22                                | 2506bp          | 0.00%                  |
| -tRNA:                             | 18              | 11026bp         | 0.00%                  | 36                                 | 1620bp          | 0.00%                  | 0                                 | 0bp             | 0.00%                  |
| -tRNA-7SL:                         | 18              | 2263bp          | 0.00%                  | 0                                  | 0bp             | 0.00%                  | 0                                 | 0bp             | 0.00%                  |
| -tRNA-Core-L2:                     | 4               | 866bp           | 0.00%                  | 0                                  | 0bp             | 0.00%                  | 0                                 | 0bp             | 0.00%                  |
| <b>Satellite:</b>                  | 14413           | 2699863bp       | 0.10%                  | 1751                               | 1045108bp       | 0.04%                  | 542                               | 178380bp        | 0.01%                  |
| -S5:                               | 4               | 1078bp          | 0.00%                  | 0                                  | 0bp             | 0.00%                  | 0                                 | 0bp             | 0.00%                  |
| -OTHER:                            | 14409           | 2698785bp       | 0.10%                  | 1751                               | 1045108bp       | 0.04%                  | 542                               | 178380bp        | 0.01%                  |
| <b>Simple:</b>                     | 77612           | 3656460bp       | 0.13%                  | 410                                | 58513bp         | 0.00%                  | 782                               | 41962bp         | 0.00%                  |
| -repeat:                           | 77612           | 3656460bp       | 0.13%                  | 410                                | 58513bp         | 0.00%                  | 782                               | 41962bp         | 0.00%                  |
| <b>Unknown:</b>                    | 967058          | 60613644bp      | 2.15%                  | 106671                             | 13870586bp      | 0.49%                  | 4032                              | 2542822bp       | 0.09%                  |
| -OTHER:                            | 964526          | 60438386bp      | 2.14%                  | 106671                             | 13870586bp      | 0.49%                  | 4032                              | 2542822bp       | 0.09%                  |
| -Y-chromosome:                     | 2532            | 227820bp        | 0.01%                  | 0                                  | 0bp             | 0.00%                  | 0                                 | 0bp             | 0.00%                  |
| <b>rRNA:</b>                       | 204             | 11801bp         | 0.00%                  | 157                                | 9129bp          | 0.00%                  | 0                                 | 0bp             | 0.00%                  |

### 3.5.2 Assembly effect comparison of several tools before and after using barcode linked reads

In order to verify that long sequencing fragments can effectively resolve the problem of repetitive regions that cannot be solved during the assembly process of short sequencing fragments, we used four well-known NGS based assemblers (SOAPdenovo2, Abyss, IDBA-UD and SPAdes) to perform assembly tests on three real datasets of *Drosophila*, *Saccharomyces* and *human-chr-14*. The test results are shown in Tables S27, S28 and S29. The left sub-table shows the assemblies of various tools when barcode linked reads are not used, and the right sub-table shows the assemblies of each tools when barcode linked reads are used. 'Max' indicates the largest contig. 'MA' indicates the number of misassembly events. 'GF(%)' indicates the genome fraction. From Tables S27, S28 and S29, we can find that barcode linked reads have played an important role in resolving the unresolved repetitive regions encountered during the assembly of short paired-end reads, reducing assembly errors, and improving the integrity of assembly results.

**Table S27. Assemblies of several tools on Saccharomyces dataset before and after using barcode linked reads.**

| Assembler | Scaffolds before using barcode linked-reads |                |                |    |                |                |               | Scaffolds after using barcode linked-reads |                |                |           |                |                |               |
|-----------|---------------------------------------------|----------------|----------------|----|----------------|----------------|---------------|--------------------------------------------|----------------|----------------|-----------|----------------|----------------|---------------|
|           | Max(kb)                                     | N50 (kb)       | NG50 (kb)      | MA | NA50 (kb)      | NGA50 (kb)     | GF(%)         | Max(kb)                                    | N50 (kb)       | NG50 (kb)      | MA        | NA50 (kb)      | NGA50 (kb)     | GF(%)         |
| SOAP2     | 69.393                                      | 20.631         | 19.153         | 1  | 20.631         | 19.153         | 93.196        | 78.579                                     | 22.412         | 21.412         | 5         | 22.412         | 21.020         | 93.103        |
| Abyss     | <b>417.251</b>                              | <b>126.494</b> | <b>123.308</b> | 20 | <b>117.356</b> | <b>114.685</b> | 95.208        | 417.305                                    | 130.535        | 126.499        | 20        | 119.325        | 117.360        | 95.210        |
| IDBA-UD   | 52.339                                      | 6.221          | 5.960          | 21 | 6.190          | 5.893          | 87.551        | 52.339                                     | 6.240          | 5.981          | 19        | 6.209          | 5.895          | 87.546        |
| SPAdes    | 380.265                                     | 93.183         | 93.077         | 21 | 89.740         | 86.943         | <b>95.924</b> | <b>723.706</b>                             | <b>420.315</b> | <b>418.964</b> | <b>11</b> | <b>371.687</b> | <b>371.687</b> | <b>97.007</b> |

The left sub-table shows the assemblies of various tools when barcode linked reads are not used, and the right sub-table shows the assemblies of each tools when barcode linked reads are used. 'Max' indicates the largest contig. 'MA' indicates the number of misassembly events. 'GF(%)' indicates the genome fraction.

**Table S28. Assemblies of several tools on Human-chr14 dataset before and after using barcode linked reads.**

| Assembler | Scaffolds before using barcode linked-reads |               |               |      |               |               |               | Scaffolds after using barcode linked-reads |                |                |           |                |               |               |
|-----------|---------------------------------------------|---------------|---------------|------|---------------|---------------|---------------|--------------------------------------------|----------------|----------------|-----------|----------------|---------------|---------------|
|           | Max(kb)                                     | N50 (kb)      | NG50 (kb)     | MA   | NA50 (kb)     | NGA50 (kb)    | GF(%)         | Max(kb)                                    | N50 (kb)       | NG50 (kb)      | MA        | NA50 (kb)      | NGA50 (kb)    | GF(%)         |
| SOAP2     | 106.303                                     | 3.765         | 3.226         | 3100 | 2.580         | 2.084         | 74.229        | 108.294                                    | 14.515         | 10.320         | 1018      | 12.482         | 8.995         | 78.536        |
| Abyss     | 97.603                                      | 11.612        | 8.320         | 1162 | 10.119        | 7.344         | 77.998        | 108.294                                    | 14.515         | 10.320         | 1018      | 12.482         | 8.995         | 78.536        |
| IDBA-UD   | <b>146.481</b>                              | <b>20.684</b> | <b>15.450</b> | 224  | <b>20.236</b> | <b>15.092</b> | <b>79.743</b> | 301.267                                    | 50.736         | 37.876         | <b>36</b> | 50.483         | 37.739        | <b>80.428</b> |
| SPAdes    | 74.796                                      | 8.176         | 5.834         | 136  | 8.100         | 5.758         | 78.373        | <b>880.789</b>                             | <b>203.996</b> | <b>147.576</b> | 687       | <b>112.745</b> | <b>82.897</b> | 79.363        |

The left sub-table shows the assemblies of various tools when barcode linked reads are not used, and the right sub-table shows the assemblies of each tools when barcode linked reads are used. 'Max' indicates the largest contig. 'MA' indicates the number of misassembly events. 'GF(%)' indicates the genome fraction.

**Table S29. Assemblies of several tools on Drosophila melanogaster dataset before and after using barcode linked reads.**

| Assembler | Scaffolds before using barcode linked-reads |          |           |           |              |            |               | Scaffolds after using barcode linked-reads |                |                |           |                |                |               |
|-----------|---------------------------------------------|----------|-----------|-----------|--------------|------------|---------------|--------------------------------------------|----------------|----------------|-----------|----------------|----------------|---------------|
|           | Max(kb)                                     | N50 (kb) | NG50 (kb) | MA        | NA50 (kb)    | NGA50 (kb) | GF(%)         | Max(kb)                                    | N50 (kb)       | NG50 (kb)      | MA        | NA50 (kb)      | NGA50 (kb)     | GF(%)         |
| SOAP2     | 13.074                                      | 1.474    | 0.562     | 219       | 0.944        | NA         | 36.512        | 498.151                                    | 76.351         | 36.886         | 23        | 76.351         | 36.886         | 68.513        |
| Abyss     | 15.802                                      | 0.857    | NA        | <b>43</b> | <b>0.835</b> | NA         | 26.017        | 906.991                                    | 136.028        | 66.342         | 249       | 122.650        | 58.530         | 68.497        |
| IDBA-UD   | 66.115                                      | 6.776    | 3.301     | 1795      | 6.441        | 3.061      | 65.958        | 243.301                                    | 24.091         | 12.335         | <b>19</b> | 23.565         | 11.929         | 70.865        |
| SPAdes    | 109.693                                     | 13.065   | 6.452     | 1119      | 12.422       | 5.998      | <b>67.459</b> | <b>1423.779</b>                            | <b>276.610</b> | <b>141.947</b> | 1672      | <b>194.398</b> | <b>100.383</b> | <b>71.118</b> |

The left sub-table shows the assemblies of various tools when barcode linked reads are not used, and the right sub-table shows the assemblies of each tools when barcode linked reads are used. 'Max' indicates the largest contig. 'MA' indicates the number of misassembly events. 'GF(%)' indicates the genome fraction.



### 3.5.3 Detection results of *de novo* mode based on only NGS short reads

The detection results of LongRepMarker in *de novo* mode based on only NGS short reads are shown in Fig. S24 and Tables S30-S39. Five NGS datasets (Drosophila, Ant, Mouse, Human-chr14 and HG003\_NA24149\_father (WGS)) are used in this test, and the performance of LongRepMarker is compared with the two similar tools (RepARK and REPdenovo). From Fig. S24, we can find that the distribution range of length and repetition frequency of the repetitive sequences found by LongRepMarker is larger than that of those two similar tools, which also means that the detection results of LongRepMarker are more comprehensive and complete than that of the two similar tools. For example, the detected repetitive fragment length of LongRepMarker on dataset Mouse ranged from 1bp to 23.6kb, while that of RepARK and REPdenovo ranged from 1bp to 16.4kp and from 1bp to 6.1kp, respectively. Tables S30-S39 show the proportion and detailed classification of the detection results generated from three tools on these five NGS datasets covering the corresponding RepBase library and reference genome.

From the perspective of the coverage of the total base ratio, LongRepMarker has certain advantages compared with the latter two tools. For example, the detection results of LongRepMarker on Mouse dataset covered 69.48% of the bases in the corresponding RepBase library, while the corresponding ratios of RepARK and REPdenovo are 51.62% and 22.70%, respectively. Some practice example show the completeness and coverage of the repetitive sequences detected by LongRepMarker, RepARK and REPdenovo in the same region of the mouse genome, just as shown in Fig. S25-S28.

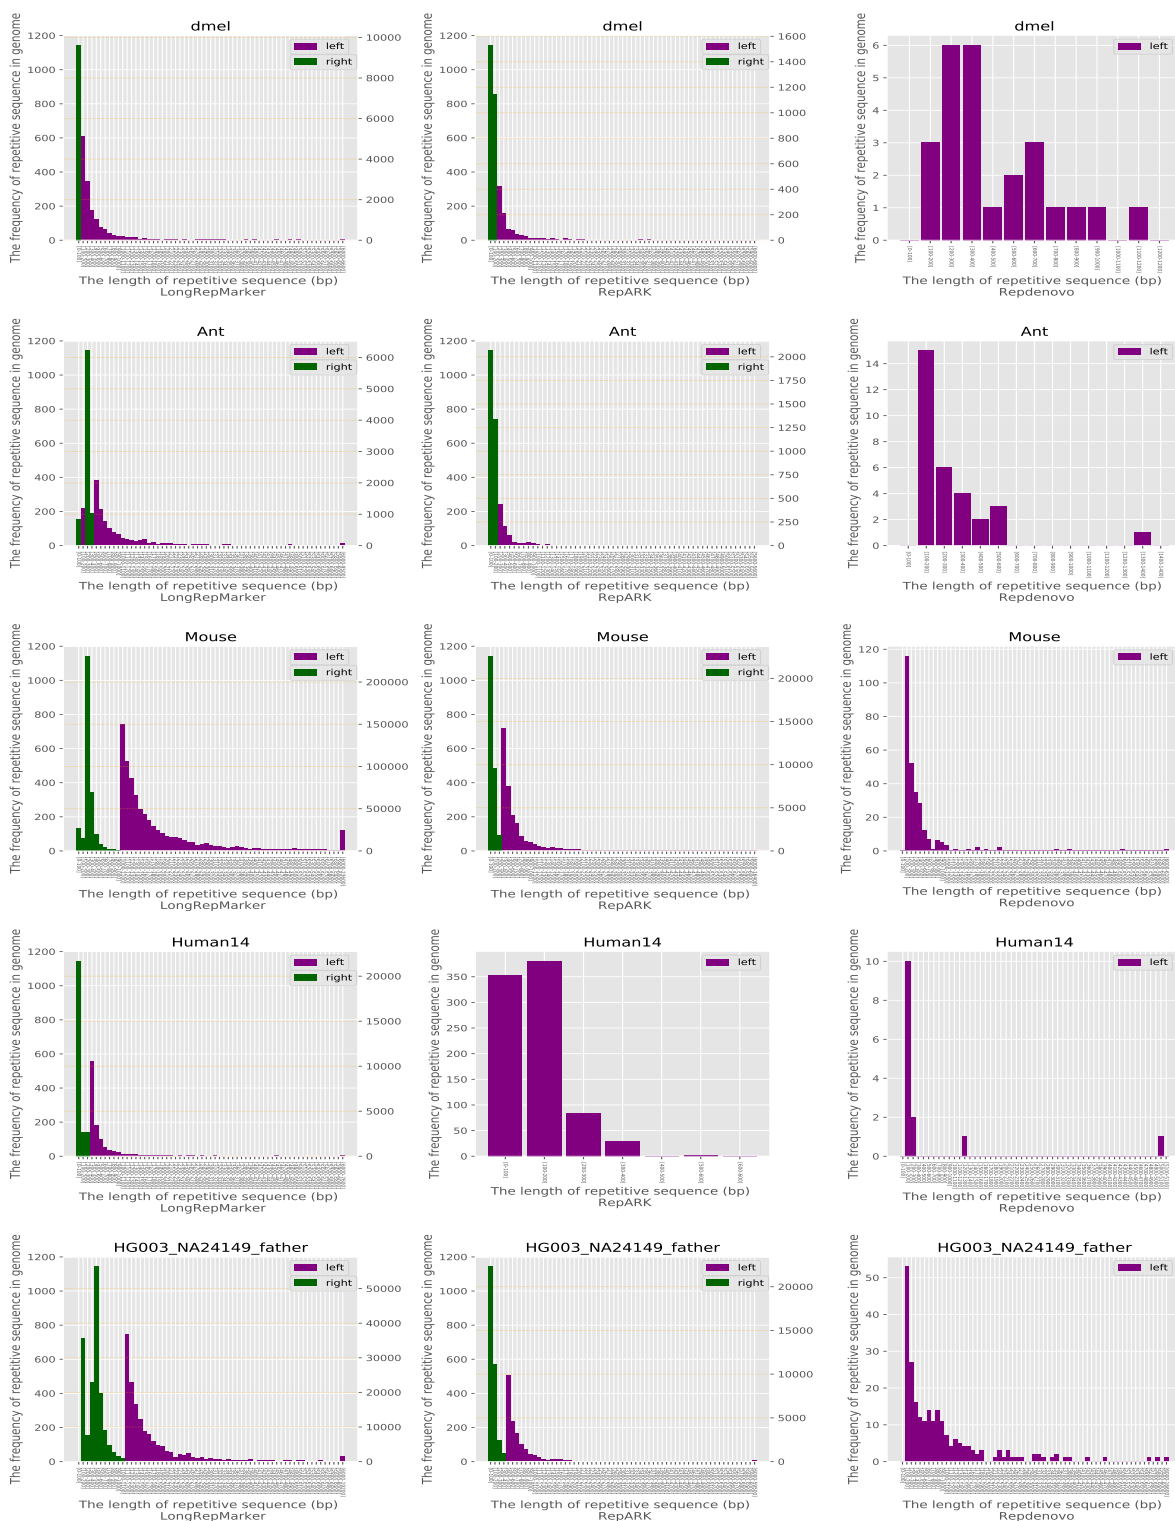

**Fig. S24.** Comparison of the repetition frequency and length distribution of the detected fragments generated from three tools. The X-axis represents the length distribution of the detected fragments and Y-axis represents the repetition frequency of the detected fragments in the genome, and the three images in each row respectively represent the frequency and length distribution of the repeated sequences detected by the three tools in a certain species. The coordinates of the Y-axis are divided into left and right displays, where the low frequency on the left is represented by purple, and the high frequency on the right is represented by green.

Table S30. Comparison of the proportion and detailed classification of detection results generated by three tools on *Drosophila* dataset covering the corresponding RepBase library.

| LongRepMarker                                                                   |                 |                 |                        | RepARK                                                                          |                 |                        | REPdenovo                                                                     |                 |                        |
|---------------------------------------------------------------------------------|-----------------|-----------------|------------------------|---------------------------------------------------------------------------------|-----------------|------------------------|-------------------------------------------------------------------------------|-----------------|------------------------|
| sequence: 2489<br>total length: 7220516bp<br>bases masked: 3051295 bp ( 42.26%) |                 |                 |                        | sequence: 2489<br>total length: 7220516bp<br>bases masked: 2820283 bp ( 39.06%) |                 |                        | sequence: 2489<br>total length: 7220516bp<br>bases masked: 199042 bp ( 2.76%) |                 |                        |
| Repeat Types                                                                    | Num of elements | Length occupied | Percentage of sequence | Num of elements                                                                 | Length occupied | Percentage of sequence | Num of elements                                                               | Length occupied | Percentage of sequence |
| DNA transposon elements:                                                        | 243             | 84091bp         | 1.16%                  | 419                                                                             | 67480bp         | 0.93%                  | 12                                                                            | 1758bp          | 0.02%                  |
| -TcMar-Tigger:                                                                  | 0               | 0bp             | 0.00%                  | 0                                                                               | 0bp             | 0.00%                  | 0                                                                             | 0bp             | 0.00%                  |
| -hAT-Charlie:                                                                   | 0               | 0bp             | 0.00%                  | 0                                                                               | 0bp             | 0.00%                  | 0                                                                             | 0bp             | 0.00%                  |
| LINEs:                                                                          | 1203            | 893842bp        | 12.38%                 | 2304                                                                            | 790389bp        | 10.95%                 | 189                                                                           | 74869bp         | 1.04%                  |
| -L3/CR1:                                                                        | 178             | 90613bp         | 1.25%                  | 345                                                                             | 77798bp         | 1.08%                  | 0                                                                             | 0bp             | 0.00%                  |
| -LINE1:                                                                         | 0               | 0bp             | 0.00%                  | 0                                                                               | 0bp             | 0.00%                  | 0                                                                             | 0bp             | 0.00%                  |
| -LINE2:                                                                         | 0               | 0bp             | 0.00%                  | 0                                                                               | 0bp             | 0.00%                  | 0                                                                             | 0bp             | 0.00%                  |
| LTR elements:                                                                   | 2328            | 1948634bp       | 26.99%                 | 3444                                                                            | 1834947bp       | 25.41%                 | 2                                                                             | 317bp           | 0.00%                  |
| -ERV1:                                                                          | 0               | 0bp             | 0.00%                  | 0                                                                               | 0bp             | 0.00%                  | 0                                                                             | 0bp             | 0.00%                  |
| -ERV1-MaLRs:                                                                    | 0               | 0bp             | 0.00%                  | 0                                                                               | 0bp             | 0.00%                  | 0                                                                             | 0bp             | 0.00%                  |
| -ERV-classI:                                                                    | 0               | 0bp             | 0.00%                  | 0                                                                               | 0bp             | 0.00%                  | 0                                                                             | 0bp             | 0.00%                  |
| -ERV-classII:                                                                   | 0               | 0bp             | 0.00%                  | 0                                                                               | 0bp             | 0.00%                  | 0                                                                             | 0bp             | 0.00%                  |
| Low complexity:                                                                 | 333             | 18139bp         | 0.25%                  | 350                                                                             | 19015bp         | 0.26%                  | 456                                                                           | 24145bp         | 0.33%                  |
| SINEs:                                                                          | 1               | 135bp           | 0.00%                  | 0                                                                               | 0bp             | 0.00%                  | 0                                                                             | 0bp             | 0.00%                  |
| -ALUs:                                                                          | 0               | 0bp             | 0.00%                  | 0                                                                               | 0bp             | 0.00%                  | 0                                                                             | 0bp             | 0.00%                  |
| -MIRs:                                                                          | 0               | 0bp             | 0.00%                  | 0                                                                               | 0bp             | 0.00%                  | 0                                                                             | 0bp             | 0.00%                  |
| Satellites:                                                                     | 20              | 4926bp          | 0.07%                  | 36                                                                              | 4122bp          | 0.06%                  | 6                                                                             | 1791bp          | 0.02%                  |
| Simple repeats:                                                                 | 1253            | 81143bp         | 1.12%                  | 1288                                                                            | 82461bp         | 1.14%                  | 1494                                                                          | 92425bp         | 1.28%                  |
| Small RNA:                                                                      | 15              | 13770bp         | 0.19%                  | 20                                                                              | 13760bp         | 0.19%                  | 5                                                                             | 593bp           | 0.01%                  |
| Total interspersed repeats:                                                     |                 | 2935431bp       | 40.65%                 |                                                                                 | 2702177bp       | 37.42%                 |                                                                               | 80127bp         | 1.11%                  |
| Unclassified:                                                                   | 63              | 8729bp          | 0.12%                  | 70                                                                              | 9361bp          | 0.13%                  | 7                                                                             | 3183bp          | 0.04%                  |

Table S31. Comparison of the proportion and detailed classification of detection results generated by three tools on *Ant* dataset covering the corresponding RepBase library.

| LongRepMarker                                                                |                 |                 |                        | RepARK                                                                       |                 |                        | REPdenovo                                                                   |                 |                        |
|------------------------------------------------------------------------------|-----------------|-----------------|------------------------|------------------------------------------------------------------------------|-----------------|------------------------|-----------------------------------------------------------------------------|-----------------|------------------------|
| sequence: 254<br>total length: 214457bp<br>bases masked: 181755 bp ( 84.75%) |                 |                 |                        | sequence: 254<br>total length: 214457bp<br>bases masked: 142209 bp ( 66.31%) |                 |                        | sequence: 254<br>total length: 214457bp<br>bases masked: 46235 bp ( 21.56%) |                 |                        |
| Repeat Types                                                                 | Num of elements | Length occupied | Percentage of sequence | Num of elements                                                              | Length occupied | Percentage of sequence | Num of elements                                                             | Length occupied | Percentage of sequence |
| DNA transposon elements:                                                     | 108             | 73712bp         | 34.37%                 | 261                                                                          | 62768bp         | 29.27%                 | 21                                                                          | 14153bp         | 6.60%                  |
| -TcMar-Tigger:                                                               | 0               | 0bp             | 0.00%                  | 0                                                                            | 0bp             | 0.00%                  | 0                                                                           | 0bp             | 0.00%                  |
| -hAT-Charlie:                                                                | 0               | 0bp             | 0.00%                  | 0                                                                            | 0bp             | 0.00%                  | 0                                                                           | 0bp             | 0.00%                  |
| LINEs:                                                                       | 24              | 14161bp         | 6.60%                  | 59                                                                           | 9312bp          | 4.34%                  | 0                                                                           | 0bp             | 0.00%                  |
| -L3/CR1:                                                                     | 0               | 0bp             | 0.00%                  | 0                                                                            | 0bp             | 0.00%                  | 0                                                                           | 0bp             | 0.00%                  |
| -LINE1:                                                                      | 0               | 0bp             | 0.00%                  | 0                                                                            | 0bp             | 0.00%                  | 0                                                                           | 0bp             | 0.00%                  |
| -LINE2:                                                                      | 0               | 0bp             | 0.00%                  | 0                                                                            | 0bp             | 0.00%                  | 0                                                                           | 0bp             | 0.00%                  |
| LTR elements:                                                                | 40              | 44578bp         | 20.79%                 | 91                                                                           | 24272bp         | 11.32%                 | 0                                                                           | 0bp             | 0.00%                  |
| -ERV1:                                                                       | 0               | 0bp             | 0.00%                  | 0                                                                            | 0bp             | 0.00%                  | 0                                                                           | 0bp             | 0.00%                  |
| -ERV1-MaLRs:                                                                 | 0               | 0bp             | 0.00%                  | 0                                                                            | 0bp             | 0.00%                  | 0                                                                           | 0bp             | 0.00%                  |
| -ERV-classI:                                                                 | 0               | 0bp             | 0.00%                  | 0                                                                            | 0bp             | 0.00%                  | 0                                                                           | 0bp             | 0.00%                  |
| -ERV-classII:                                                                | 0               | 0bp             | 0.00%                  | 0                                                                            | 0bp             | 0.00%                  | 0                                                                           | 0bp             | 0.00%                  |
| Low complexity:                                                              | 1               | 72bp            | 0.03%                  | 2                                                                            | 137bp           | 0.06%                  | 8                                                                           | 351bp           | 0.16%                  |
| SINEs:                                                                       | 0               | 0bp             | 0.00%                  | 1                                                                            | 45bp            | 0.02%                  | 0                                                                           | 0bp             | 0.00%                  |
| -ALUs:                                                                       | 0               | 0bp             | 0.00%                  | 0                                                                            | 0bp             | 0.00%                  | 0                                                                           | 0bp             | 0.00%                  |
| -MIRs:                                                                       | 0               | 0bp             | 0.00%                  | 0                                                                            | 0bp             | 0.00%                  | 0                                                                           | 0bp             | 0.00%                  |
| Satellites:                                                                  | 0               | 0bp             | 0.00%                  | 0                                                                            | 0bp             | 0.00%                  | 0                                                                           | 0bp             | 0.00%                  |
| Simple repeats:                                                              | 185             | 30802bp         | 14.36%                 | 194                                                                          | 30860bp         | 14.39%                 | 208                                                                         | 31731bp         | 14.80%                 |
| Small RNA:                                                                   | 15              | 13646bp         | 6.36%                  | 15                                                                           | 13826bp         | 6.45%                  | 0                                                                           | 0bp             | 0.00%                  |
| Total interspersed repeats:                                                  |                 | 138052bp        | 64.37%                 |                                                                              | 97695bp         | 45.55%                 |                                                                             | 14153bp         | 6.60%                  |
| Unclassified:                                                                | 11              | 5601bp          | 2.61%                  | 17                                                                           | 1298bp          | 0.61%                  | 0                                                                           | 0bp             | 0.00%                  |

Table S32. Comparison of the proportion and detailed classification of detection results generated by three tools on *Mouse* dataset covering the corresponding RepBase library.

| LongRepMarker                                                                   |                 |                 |                        | RepARK                                                                         |                 |                        | REPdenovo                                                                      |                 |                        |
|---------------------------------------------------------------------------------|-----------------|-----------------|------------------------|--------------------------------------------------------------------------------|-----------------|------------------------|--------------------------------------------------------------------------------|-----------------|------------------------|
| sequence: 1561<br>total length: 1680566bp<br>bases masked: 1167584 bp ( 69.48%) |                 |                 |                        | sequence: 1561<br>total length: 1680566bp<br>bases masked: 867535 bp ( 51.62%) |                 |                        | sequence: 1561<br>total length: 1680566bp<br>bases masked: 381565 bp ( 22.70%) |                 |                        |
| Repeat Types                                                                    | Num of elements | Length occupied | Percentage of sequence | Num of elements                                                                | Length occupied | Percentage of sequence | Num of elements                                                                | Length occupied | Percentage of sequence |
| DNA transposon elements:                                                        | 395             | 69181bp         | 4.12%                  | 40                                                                             | 8027bp          | 0.48%                  | 0                                                                              | 0bp             | 0.00%                  |
| -TcMar-Tigger:                                                                  | 75              | 13659bp         | 0.81%                  | 2                                                                              | 222bp           | 0.01%                  | 0                                                                              | 0bp             | 0.00%                  |
| -hAT-Charlie:                                                                   | 145             | 28233bp         | 1.68%                  | 27                                                                             | 6071bp          | 0.36%                  | 0                                                                              | 0bp             | 0.00%                  |
| LINEs:                                                                          | 646             | 454590bp        | 27.05%                 | 371                                                                            | 334128bp        | 19.88%                 | 241                                                                            | 299948bp        | 17.85%                 |
| -L3/CR1:                                                                        | 21              | 2981bp          | 0.18%                  | 0                                                                              | 0bp             | 0.00%                  | 0                                                                              | 0bp             | 0.00%                  |
| -LINE1:                                                                         | 591             | 447010bp        | 26.60%                 | 367                                                                            | 333804bp        | 19.86%                 | 241                                                                            | 299948bp        | 17.85%                 |
| -LINE2:                                                                         | 22              | 3006bp          | 0.18%                  | 4                                                                              | 324bp           | 0.02%                  | 0                                                                              | 0bp             | 0.00%                  |
| LTR elements:                                                                   | 981             | 532020bp        | 31.66%                 | 1795                                                                           | 450620bp        | 26.81%                 | 118                                                                            | 31176bp         | 1.86%                  |
| -ERV1:                                                                          | 183             | 73304bp         | 4.36%                  | 265                                                                            | 35675bp         | 2.12%                  | 32                                                                             | 11265bp         | 0.67%                  |
| -ERV1-MaLRs:                                                                    | 156             | 13941bp         | 1.90%                  | 102                                                                            | 23074bp         | 1.37%                  | 43                                                                             | 10176bp         | 0.61%                  |
| -ERV-classI:                                                                    | 209             | 107341bp        | 6.39%                  | 338                                                                            | 85642bp         | 5.10%                  | 0                                                                              | 0bp             | 0.00%                  |
| -ERV-classII:                                                                   | 399             | 313254bp        | 18.64%                 | 1086                                                                           | 305486bp        | 18.18%                 | 43                                                                             | 9735bp          | 0.58%                  |
| Low complexity:                                                                 | 26              | 1069bp          | 0.06%                  | 51                                                                             | 2566bp          | 0.15%                  | 97                                                                             | 5116bp          | 0.30%                  |
| SINEs:                                                                          | 273             | 46075bp         | 2.74%                  | 110                                                                            | 13784bp         | 0.82%                  | 29                                                                             | 2553bp          | 0.15%                  |
| -ALUs:                                                                          | 164             | 31988bp         | 1.90%                  | 56                                                                             | 7858bp          | 0.47%                  | 24                                                                             | 1826bp          | 0.11%                  |
| -MIRs:                                                                          | 5               | 943bp           | 0.06%                  | 4                                                                              | 589bp           | 0.04%                  | 0                                                                              | 0bp             | 0.00%                  |
| Satellites:                                                                     | 10              | 3642bp          | 0.22%                  | 22                                                                             | 4181bp          | 0.25%                  | 2                                                                              | 734bp           | 0.04%                  |
| Simple repeats:                                                                 | 286             | 34991bp         | 2.08%                  | 354                                                                            | 37830bp         | 2.25%                  | 426                                                                            | 42038bp         | 2.50%                  |
| Small RNA:                                                                      | 41              | 14171bp         | 0.84%                  | 46                                                                             | 12537bp         | 0.75%                  | 0                                                                              | 0bp             | 0.00%                  |
| Total interspersed repeats:                                                     |                 | 1126788bp       | 67.05%                 |                                                                                | 815147bp        | 48.50%                 |                                                                                | 333677bp        | 19.86%                 |
| Unclassified:                                                                   | 172             | 24922bp         | 1.48%                  | 63                                                                             | 8588bp          | 0.51%                  | 0                                                                              | 0bp             | 0.00%                  |

Table S33. Comparison of the proportion and detailed classification of detection results generated by three tools on *Human-chr14* dataset covering the corresponding RepBase library.

| LongRepMarker                                                                  |                 |                 |                        | RepARK                                                                         |                 |                        | REPdenovo                                                                      |                 |                        |
|--------------------------------------------------------------------------------|-----------------|-----------------|------------------------|--------------------------------------------------------------------------------|-----------------|------------------------|--------------------------------------------------------------------------------|-----------------|------------------------|
| sequence: 1512<br>total length: 1647075bp<br>bases masked: 452080 bp ( 27.45%) |                 |                 |                        | sequence: 1512<br>total length: 1647075bp<br>bases masked: 229636 bp ( 13.94%) |                 |                        | sequence: 1512<br>total length: 1647075bp<br>bases masked: 183245 bp ( 11.13%) |                 |                        |
| Repeat Types                                                                   | Num of elements | Length occupied | Percentage of sequence | Num of elements                                                                | Length occupied | Percentage of sequence | Num of elements                                                                | Length occupied | Percentage of sequence |
| DNA transposon elements:                                                       | 81              | 13426bp         | 0.82%                  | 32                                                                             | 2828bp          | 0.17%                  | 0                                                                              | 0bp             | 0.00%                  |
| -TcMar-Tigger:                                                                 | 40              | 8134bp          | 0.49%                  | 23                                                                             | 2045bp          | 0.12%                  | 0                                                                              | 0bp             | 0.00%                  |
| -hAT-Charlie:                                                                  | 23              | 3836bp          | 0.23%                  | 5                                                                              | 461bp           | 0.03%                  | 0                                                                              | 0bp             | 0.00%                  |
| LINEs:                                                                         | 345             | 191120bp        | 11.60%                 | 544                                                                            | 118330bp        | 7.18%                  | 126                                                                            | 116694bp        | 7.08%                  |
| -L3/CR1:                                                                       | 6               | 243bp           | 0.01%                  | 1                                                                              | 75bp            | 0.00%                  | 0                                                                              | 0bp             | 0.00%                  |
| -LINE1:                                                                        | 309             | 178143bp        | 10.82%                 | 540                                                                            | 117752bp        | 7.15%                  | 126                                                                            | 116694bp        | 7.08%                  |
| -LINE2:                                                                        | 10              | 2268bp          | 0.14%                  | 3                                                                              | 503bp           | 0.03%                  | 0                                                                              | 0bp             | 0.00%                  |
| LTR elements:                                                                  | 539             | 155596bp        | 9.45%                  | 260                                                                            | 35630bp         | 2.16%                  | 15                                                                             | 1427bp          | 0.09%                  |
| -ERV1:                                                                         | 119             | 36766bp         | 2.23%                  | 30                                                                             | 3894bp          | 0.24%                  | 0                                                                              | 0bp             | 0.00%                  |
| -ERV1-MaLRs:                                                                   | 70              | 12274bp         | 0.75%                  | 49                                                                             | 8109bp          | 0.49%                  | 15                                                                             | 1427bp          | 0.09%                  |
| -ERV-classI:                                                                   | 310             | 91588bp         | 5.56%                  | 144                                                                            | 19917bp         | 1.21%                  | 0                                                                              | 0bp             | 0.00%                  |
| -ERV-classII:                                                                  | 28              | 12635bp         | 0.77%                  | 37                                                                             | 3710bp          | 0.23%                  | 0                                                                              | 0bp             | 0.00%                  |
| Low complexity:                                                                | 60              | 3018bp          | 0.18%                  | 85                                                                             | 4170bp          | 0.25%                  | 82                                                                             | 4030bp          | 0.24%                  |
| SINEs:                                                                         | 183             | 39215bp         | 2.38%                  | 74                                                                             | 19956bp         | 1.21%                  | 71                                                                             | 18201bp         | 1.11%                  |
| -ALUs:                                                                         | 173             | 38321bp         | 2.33%                  | 70                                                                             | 19316bp         | 1.17%                  | 71                                                                             | 18201bp         | 1.11%                  |
| -MIRs:                                                                         | 10              | 894bp           | 0.05%                  | 4                                                                              | 640bp           | 0.04%                  | 0                                                                              | 0bp             | 0.00%                  |
| Satellites:                                                                    | 14              | 3334bp          | 0.20%                  | 19                                                                             | 1908bp          | 0.12%                  | 6                                                                              | 524bp           | 0.03%                  |
| Simple repeats:                                                                | 393             | 39165bp         | 2.38%                  | 408                                                                            | 40077bp         | 2.43%                  | 419                                                                            | 40550bp         | 2.46%                  |
| Small RNA:                                                                     | 0               | 0bp             | 0.00%                  | 2                                                                              | 224bp           | 0.01%                  | 0                                                                              | 0bp             | 0.00%                  |
| Total interspersed repeats:                                                    |                 | 407126bp        | 24.72%                 |                                                                                | 183285bp        | 11.13%                 |                                                                                | 138141bp        | 8.39%                  |
| Unclassified:                                                                  | 21              | 7769bp          | 0.47%                  | 51                                                                             | 6541bp          | 0.40%                  | 10                                                                             | 1819bp          | 0.11%                  |

Table S34. Comparison of the proportion and detailed classification of detection results generated by three tools on HG003\_NA24149\_father dataset covering the corresponding RepBase library.

| LongRepMarker                      |                 |                 |                        | RepARK                            |                 |                        | REPdenovo                         |                 |                        |
|------------------------------------|-----------------|-----------------|------------------------|-----------------------------------|-----------------|------------------------|-----------------------------------|-----------------|------------------------|
| sequence: 1512                     |                 |                 |                        | sequence: 1512                    |                 |                        | sequence: 1512                    |                 |                        |
| total length: 1647075bp            |                 |                 |                        | total length: 1647075bp           |                 |                        | total length: 1647075bp           |                 |                        |
| bases masked: 1210784 bp ( 73.51%) |                 |                 |                        | bases masked: 870210 bp ( 52.83%) |                 |                        | bases masked: 199536 bp ( 12.11%) |                 |                        |
| Repeat Types                       | Num of elements | Length occupied | Percentage of sequence | Num of elements                   | Length occupied | Percentage of sequence | Num of elements                   | Length occupied | Percentage of sequence |
| DNA transposon                     | 448             | 121106bp        | 7.35%                  | 378                               | 60164bp         | 3.65%                  | 0                                 | 0bp             | 0.00%                  |
| elements:                          |                 |                 |                        |                                   |                 |                        |                                   |                 |                        |
| -TcMar-Tigger:                     | 126             | 37522bp         | 2.28%                  | 129                               | 23339bp         | 1.42%                  | 0                                 | 0bp             | 0.00%                  |
| -hAT-Charlie:                      | 143             | 39145bp         | 2.38%                  | 121                               | 17883bp         | 1.09%                  | 0                                 | 0bp             | 0.00%                  |
| LINEs:                             | 653             | 291629bp        | 17.71%                 | 504                               | 213163bp        | 12.94%                 | 129                               | 123854bp        | 7.52%                  |
| -L3/CR1:                           | 26              | 4388bp          | 0.27%                  | 5                                 | 1076bp          | 0.07%                  | 0                                 | 0bp             | 0.00%                  |
| -LINE1:                            | 586             | 278984bp        | 16.94%                 | 481                               | 209312bp        | 12.71%                 | 129                               | 123854bp        | 7.52%                  |
| -LINE2:                            | 21              | 4123bp          | 0.25%                  | 12                                | 1992bp          | 0.12%                  | 0                                 | 0bp             | 0.00%                  |
| LTR elements:                      | 1082            | 620894bp        | 37.70%                 | 2467                              | 483315bp        | 29.34%                 | 14                                | 1927bp          | 0.12%                  |
| -ERVL:                             | 219             | 92790bp         | 5.63%                  | 336                               | 68843bp         | 4.18%                  | 0                                 | 0bp             | 0.00%                  |
| -ERVL-MaLRs:                       | 102             | 23018bp         | 1.40%                  | 93                                | 26417bp         | 1.60%                  | 14                                | 1927bp          | 0.12%                  |
| -ERV-classI:                       | 649             | 418886bp        | 25.43%                 | 1713                              | 320240bp        | 19.44%                 | 0                                 | 0bp             | 0.00%                  |
| -ERV-classII:                      | 63              | 76152bp         | 4.62%                  | 309                               | 65213bp         | 3.96%                  | 0                                 | 0bp             | 0.00%                  |
| Low complexity:                    | 16              | 652bp           | 0.04%                  | 40                                | 2039bp          | 0.12%                  | 81                                | 3926bp          | 0.24%                  |
| SINEs:                             | 503             | 112306bp        | 6.82%                  | 198                               | 37531bp         | 2.28%                  | 72                                | 19991bp         | 1.21%                  |
| -ALUs:                             | 469             | 108143bp        | 6.57%                  | 162                               | 34020bp         | 2.07%                  | 72                                | 19991bp         | 1.21%                  |
| -MIRs:                             | 25              | 3428bp          | 0.21%                  | 17                                | 1893bp          | 0.11%                  | 0                                 | 0bp             | 0.00%                  |
| Satellites:                        | 39              | 9924bp          | 0.60%                  | 102                               | 16427bp         | 1.00%                  | 11                                | 1683bp          | 0.10%                  |
| Simple repeats:                    | 234             | 32433bp         | 1.97%                  | 318                               | 36600bp         | 2.22%                  | 414                               | 40423bp         | 2.45%                  |
| Small RNA:                         | 23              | 13124bp         | 0.80%                  | 44                                | 12839bp         | 0.78%                  | 0                                 | 0bp             | 0.00%                  |
| Total interspersed repeats:        |                 | 1165100bp       | 70.74%                 |                                   | 806029bp        | 48.94%                 |                                   | 153504bp        | 9.32%                  |
| Unclassified:                      | 80              | 19165bp         | 1.16%                  | 109                               | 11856bp         | 0.72%                  | 34                                | 7732bp          | 0.47%                  |

Table S35. Comparison of the proportion and detailed classification of detection results generated by three tools covering the repeat regions on the reference genome of Drosophila.

| LongRepMarker                      |                 |                 |                        | RepARK                             |                 |                        | REPdenovo                        |                 |                        |
|------------------------------------|-----------------|-----------------|------------------------|------------------------------------|-----------------|------------------------|----------------------------------|-----------------|------------------------|
| sequence: 15                       |                 |                 |                        | sequence: 15                       |                 |                        | sequence: 15                     |                 |                        |
| total length: 168736537bp          |                 |                 |                        | total length: 168736537bp          |                 |                        | total length: 168736537bp        |                 |                        |
| bases masked: 13152663 bp ( 7.79%) |                 |                 |                        | bases masked: 10328668 bp ( 6.12%) |                 |                        | bases masked: 445253 bp ( 0.26%) |                 |                        |
| Repeat Types                       | Num of elements | Length occupied | Percentage of sequence | Num of elements                    | Length occupied | Percentage of sequence | Num of elements                  | Length occupied | Percentage of sequence |
| DNA:                               | 8667            | 472889bp        | 0.28%                  | 4295                               | 413650bp        | 0.25%                  | 33                               | 6463bp          | 0.00%                  |
| -CMC-Transib:                      | 131             | 42384bp         | 0.03%                  | 485                                | 38315bp         | 0.02%                  | 0                                | 0bp             | 0.00%                  |
| -MULE-NOF:                         | 100             | 20167bp         | 0.01%                  | 100                                | 26640bp         | 0.02%                  | 0                                | 0bp             | 0.00%                  |
| -P:                                | 7820            | 270518bp        | 0.16%                  | 2330                               | 166430bp        | 0.10%                  | 33                               | 6463bp          | 0.00%                  |
| -TcMar-Pogo:                       | 132             | 21336bp         | 0.01%                  | 158                                | 27829bp         | 0.02%                  | 0                                | 0bp             | 0.00%                  |
| -TcMar-Tc1:                        | 310             | 63549bp         | 0.04%                  | 876                                | 92146bp         | 0.05%                  | 0                                | 0bp             | 0.00%                  |
| -hAT-Ac:                           | 78              | 17967bp         | 0.01%                  | 103                                | 16133bp         | 0.01%                  | 0                                | 0bp             | 0.00%                  |
| -hAT-hATm:                         | 14              | 1781bp          | 0.00%                  | 8                                  | 344bp           | 0.00%                  | 0                                | 0bp             | 0.00%                  |
| -hAT-hobo:                         | 82              | 35271bp         | 0.02%                  | 235                                | 46543bp         | 0.03%                  | 0                                | 0bp             | 0.00%                  |
| LINE:                              | 23646           | 2335075bp       | 1.38%                  | 20242                              | 2317797bp       | 1.37%                  | 391                              | 126677bp        | 0.08%                  |
| -CR1:                              | 506             | 113230bp        | 0.07%                  | 969                                | 114922bp        | 0.07%                  | 0                                | 0bp             | 0.00%                  |
| -I:                                | 279             | 137164bp        | 0.08%                  | 740                                | 136293bp        | 0.08%                  | 0                                | 0bp             | 0.00%                  |
| -I-Jockey:                         | 3432            | 926877bp        | 0.55%                  | 5504                               | 795385bp        | 0.47%                  | 0                                | 0bp             | 0.00%                  |
| -Jockey:                           | 2587            | 298888bp        | 0.18%                  | 3126                               | 455050bp        | 0.27%                  | 85                               | 29279bp         | 0.02%                  |
| -LOA:                              | 311             | 49228bp         | 0.03%                  | 661                                | 47273bp         | 0.03%                  | 0                                | 0bp             | 0.00%                  |
| -OTHER:                            | 34              | 15250bp         | 0.01%                  | 0                                  | 0bp             | 0.00%                  | 0                                | 0bp             | 0.00%                  |
| -R1:                               | 16228           | 786758bp        | 0.47%                  | 8665                               | 747875bp        | 0.44%                  | 306                              | 97398bp         | 0.06%                  |
| -R1-LOA:                           | 246             | 32082bp         | 0.02%                  | 575                                | 38344bp         | 0.02%                  | 0                                | 0bp             | 0.00%                  |
| -R2:                               | 23              | 17294bp         | 0.01%                  | 2                                  | 3609bp          | 0.00%                  | 0                                | 0bp             | 0.00%                  |
| LTR:                               | 17205           | 4938812bp       | 2.93%                  | 37735                              | 6177355bp       | 3.66%                  | 107                              | 22321bp         | 0.01%                  |
| -Copia:                            | 920             | 279327bp        | 0.17%                  | 1987                               | 322203bp        | 0.19%                  | 0                                | 0bp             | 0.00%                  |
| -Gypsy:                            | 11210           | 3737284bp       | 2.21%                  | 28143                              | 4337017bp       | 2.57%                  | 0                                | 0bp             | 0.00%                  |
| -Ngaro:                            | 2               | 197bp           | 0.00%                  | 0                                  | 0bp             | 0.00%                  | 0                                | 0bp             | 0.00%                  |
| -OTHER:                            | 19              | 3058bp          | 0.00%                  | 0                                  | 0bp             | 0.00%                  | 0                                | 0bp             | 0.00%                  |
| -Pao:                              | 5054            | 918950bp        | 0.54%                  | 7605                               | 1518146bp       | 0.90%                  | 107                              | 22321bp         | 0.01%                  |
| Other:                             | 41610           | 531208bp        | 0.31%                  | 616                                | 51603bp         | 0.03%                  | 1077                             | 176415bp        | 0.10%                  |
| -OTHER:                            | 41610           | 531208bp        | 0.31%                  | 616                                | 51603bp         | 0.03%                  | 1077                             | 176415bp        | 0.10%                  |
| RC:                                | 166             | 34553bp         | 0.02%                  | 173                                | 17915bp         | 0.01%                  | 0                                | 0bp             | 0.00%                  |
| -Helitron:                         | 166             | 34553bp         | 0.02%                  | 173                                | 17915bp         | 0.01%                  | 0                                | 0bp             | 0.00%                  |
| RNA:                               | 250             | 15785bp         | 0.01%                  | 39                                 | 9470bp          | 0.01%                  | 0                                | 0bp             | 0.00%                  |
| -OTHER:                            | 250             | 15785bp         | 0.01%                  | 39                                 | 9470bp          | 0.01%                  | 0                                | 0bp             | 0.00%                  |
| SINE:                              | 34              | 11232bp         | 0.01%                  | 0                                  | 0bp             | 0.00%                  | 0                                | 0bp             | 0.00%                  |
| -S:                                | 34              | 11232bp         | 0.01%                  | 0                                  | 0bp             | 0.00%                  | 0                                | 0bp             | 0.00%                  |
| Satellite:                         | 115731          | 2478996bp       | 1.47%                  | 5050                               | 325076bp        | 0.19%                  | 211                              | 56629bp         | 0.03%                  |
| -OTHER:                            | 115731          | 2478996bp       | 1.47%                  | 5050                               | 325076bp        | 0.19%                  | 211                              | 56629bp         | 0.03%                  |
| Simple:                            | 315254          | 561147bp        | 0.33%                  | 12909                              | 96206bp         | 0.06%                  | 0                                | 0bp             | 0.00%                  |
| -repeat:                           | 315254          | 561147bp        | 0.33%                  | 12909                              | 96206bp         | 0.06%                  | 0                                | 0bp             | 0.00%                  |
| Unknown:                           | 101943          | 2502217bp       | 1.48%                  | 11038                              | 866605bp        | 0.51%                  | 83                               | 36312bp         | 0.02%                  |
| -OTHER:                            | 101943          | 2502217bp       | 1.48%                  | 11038                              | 866605bp        | 0.51%                  | 83                               | 36312bp         | 0.02%                  |
| rRNA:                              | 960             | 306780bp        | 0.18%                  | 307                                | 77755bp         | 0.05%                  | 332                              | 94037bp         | 0.06%                  |
| -OTHER:                            | 960             | 306780bp        | 0.18%                  | 307                                | 77755bp         | 0.05%                  | 332                              | 94037bp         | 0.06%                  |
| snRNA:                             | 0               | 0bp             | 0.00%                  | 12                                 | 803bp           | 0.00%                  | 0                                | 0bp             | 0.00%                  |
| -OTHER:                            | 0               | 0bp             | 0.00%                  | 12                                 | 803bp           | 0.00%                  | 0                                | 0bp             | 0.00%                  |

**Table S36. Comparison of the proportion and detailed classification of detection results generated by three tools covering the repeat regions on the reference genome of Ant.**

| LongRepMarker                    |                 |                 |                        | RepARK                           |                 |                        | Repdenovo                       |                 |                        |
|----------------------------------|-----------------|-----------------|------------------------|----------------------------------|-----------------|------------------------|---------------------------------|-----------------|------------------------|
| sequence: 4339                   |                 |                 |                        | sequence: 4339                   |                 |                        | sequence: 4339                  |                 |                        |
| total length: 295944863bp        |                 |                 |                        | total length: 295944863bp        |                 |                        | total length: 295944863bp       |                 |                        |
| bases masked: 8200834 bp (2.77%) |                 |                 |                        | bases masked: 4151102 bp (1.40%) |                 |                        | bases masked: 113526 bp (0.04%) |                 |                        |
| Repeat Types                     | Num of elements | Length occupied | Percentage of sequence | Num of elements                  | Length occupied | Percentage of sequence | Num of elements                 | Length occupied | Percentage of sequence |
| DNA:                             | 24099           | 3286029bp       | 1.11%                  | 18041                            | 1978917bp       | 0.67%                  | 258                             | 70280bp         | 0.02%                  |
| -CMC-Chapaev-3:                  | 27              | 11562bp         | 0.00%                  | 56                               | 9445bp          | 0.00%                  | 0                               | 0bp             | 0.00%                  |
| -CMC-EnSpm:                      | 153             | 28552bp         | 0.01%                  | 14                               | 1046bp          | 0.00%                  | 0                               | 0bp             | 0.00%                  |
| -CMC-Transib:                    | 102             | 11545bp         | 0.00%                  | 41                               | 3717bp          | 0.00%                  | 0                               | 0bp             | 0.00%                  |
| -Crypton-V:                      | 48              | 4622bp          | 0.00%                  | 0                                | 0bp             | 0.00%                  | 0                               | 0bp             | 0.00%                  |
| -Kolobok-Hydra:                  | 88              | 45412bp         | 0.02%                  | 99                               | 34781bp         | 0.01%                  | 0                               | 0bp             | 0.00%                  |
| -Kolobok-T2:                     | 1140            | 182520bp        | 0.06%                  | 3567                             | 195621bp        | 0.07%                  | 10                              | 631bp           | 0.00%                  |
| -MULE-MuDR:                      | 16              | 2775bp          | 0.00%                  | 0                                | 0bp             | 0.00%                  | 21                              | 4762bp          | 0.00%                  |
| -MULE-NOF:                       | 139             | 21557bp         | 0.01%                  | 9                                | 1667bp          | 0.00%                  | 0                               | 0bp             | 0.00%                  |
| -Maverick:                       | 1108            | 405696bp        | 0.14%                  | 4155                             | 338328bp        | 0.11%                  | 0                               | 0bp             | 0.00%                  |
| -Merlin:                         | 69              | 13038bp         | 0.00%                  | 0                                | 0bp             | 0.00%                  | 0                               | 0bp             | 0.00%                  |
| -MuLE-MuDR:                      | 2               | 301bp           | 0.00%                  | 0                                | 0bp             | 0.00%                  | 0                               | 0bp             | 0.00%                  |
| -MuLE-NOF:                       | 10              | 1188bp          | 0.00%                  | 0                                | 0bp             | 0.00%                  | 0                               | 0bp             | 0.00%                  |
| -OTHER:                          | 504             | 150450bp        | 0.05%                  | 168                              | 19164bp         | 0.01%                  | 0                               | 0bp             | 0.00%                  |
| -P:                              | 48              | 19003bp         | 0.01%                  | 39                               | 2140bp          | 0.00%                  | 0                               | 0bp             | 0.00%                  |
| -PIF-Harbinger:                  | 12              | 1969bp          | 0.00%                  | 5                                | 290bp           | 0.00%                  | 0                               | 0bp             | 0.00%                  |
| -PIF-ISL2EU:                     | 2               | 1243bp          | 0.00%                  | 0                                | 0bp             | 0.00%                  | 0                               | 0bp             | 0.00%                  |
| -PIF-Spy:                        | 19              | 4617bp          | 0.00%                  | 0                                | 0bp             | 0.00%                  | 0                               | 0bp             | 0.00%                  |
| -PiggyBac:                       | 20              | 5393bp          | 0.00%                  | 0                                | 0bp             | 0.00%                  | 0                               | 0bp             | 0.00%                  |
| -TcMar:                          | 99              | 12648bp         | 0.00%                  | 93                               | 8560bp          | 0.00%                  | 0                               | 0bp             | 0.00%                  |
| -TcMar-Cweed:                    | 38              | 7817bp          | 0.00%                  | 13                               | 3062bp          | 0.00%                  | 0                               | 0bp             | 0.00%                  |
| -TcMar-Fot1:                     | 26              | 3562bp          | 0.00%                  | 0                                | 0bp             | 0.00%                  | 0                               | 0bp             | 0.00%                  |
| -TcMar-ISRm11:                   | 2               | 918bp           | 0.00%                  | 0                                | 0bp             | 0.00%                  | 0                               | 0bp             | 0.00%                  |
| -TcMar-Mariner:                  | 15982           | 1566149bp       | 0.53%                  | 5410                             | 869293bp        | 0.29%                  | 189                             | 52602bp         | 0.02%                  |
| -TcMar-Tc1:                      | 3549            | 596746bp        | 0.20%                  | 4101                             | 457886bp        | 0.15%                  | 38                              | 12285bp         | 0.00%                  |
| -TcMar-Tc4:                      | 443             | 96868bp         | 0.03%                  | 131                              | 19788bp         | 0.01%                  | 0                               | 0bp             | 0.00%                  |
| -TcMar-Tigger:                   | 0               | 0bp             | 0.00%                  | 7                                | 3290bp          | 0.00%                  | 0                               | 0bp             | 0.00%                  |
| -hAT:                            | 76              | 18749bp         | 0.01%                  | 17                               | 2038bp          | 0.00%                  | 0                               | 0bp             | 0.00%                  |
| -hAT-Ac:                         | 54              | 14405bp         | 0.00%                  | 9                                | 437bp           | 0.00%                  | 0                               | 0bp             | 0.00%                  |
| -hAT-Blackjack:                  | 212             | 44039bp         | 0.01%                  | 107                              | 10127bp         | 0.00%                  | 0                               | 0bp             | 0.00%                  |
| -hAT-Charlie:                    | 72              | 24877bp         | 0.01%                  | 0                                | 0bp             | 0.00%                  | 0                               | 0bp             | 0.00%                  |
| -hAT-Tip100:                     | 16              | 2953bp          | 0.00%                  | 0                                | 0bp             | 0.00%                  | 0                               | 0bp             | 0.00%                  |
| -hAT-hAT19:                      | 23              | 2556bp          | 0.00%                  | 0                                | 0bp             | 0.00%                  | 0                               | 0bp             | 0.00%                  |
| LINE:                            | 1892            | 520030bp        | 0.18%                  | 2572                             | 213280bp        | 0.07%                  | 0                               | 0bp             | 0.00%                  |
| -CR1:                            | 29              | 9954bp          | 0.00%                  | 0                                | 0bp             | 0.00%                  | 0                               | 0bp             | 0.00%                  |
| -I:                              | 130             | 65937bp         | 0.02%                  | 76                               | 5544bp          | 0.00%                  | 0                               | 0bp             | 0.00%                  |
| -I-Jockey:                       | 8               | 3676bp          | 0.00%                  | 26                               | 1663bp          | 0.00%                  | 0                               | 0bp             | 0.00%                  |
| -Jockey:                         | 35              | 15371bp         | 0.01%                  | 80                               | 7256bp          | 0.00%                  | 0                               | 0bp             | 0.00%                  |
| -L1:                             | 13              | 1385bp          | 0.00%                  | 6                                | 429bp           | 0.00%                  | 0                               | 0bp             | 0.00%                  |
| -L2:                             | 126             | 19399bp         | 0.01%                  | 34                               | 3154bp          | 0.00%                  | 0                               | 0bp             | 0.00%                  |
| -OTHER:                          | 0               | 0bp             | 0.00%                  | 50                               | 2535bp          | 0.00%                  | 0                               | 0bp             | 0.00%                  |
| -Penelope:                       | 1179            | 313785bp        | 0.11%                  | 1543                             | 130675bp        | 0.04%                  | 0                               | 0bp             | 0.00%                  |
| -R1:                             | 258             | 59355bp         | 0.02%                  | 669                              | 55749bp         | 0.02%                  | 0                               | 0bp             | 0.00%                  |
| -R2-NeSL:                        | 69              | 15271bp         | 0.01%                  | 69                               | 5162bp          | 0.00%                  | 0                               | 0bp             | 0.00%                  |
| -RTE-BovB:                       | 2               | 235bp           | 0.00%                  | 0                                | 0bp             | 0.00%                  | 0                               | 0bp             | 0.00%                  |
| -RTE-X:                          | 34              | 10360bp         | 0.00%                  | 19                               | 1291bp          | 0.00%                  | 0                               | 0bp             | 0.00%                  |
| -Tad1:                           | 9               | 6599bp          | 0.00%                  | 0                                | 0bp             | 0.00%                  | 0                               | 0bp             | 0.00%                  |
| LTR:                             | 1887            | 586849bp        | 0.20%                  | 3931                             | 366397bp        | 0.12%                  | 0                               | 0bp             | 0.00%                  |
| -Copia:                          | 132             | 62359bp         | 0.02%                  | 532                              | 68777bp         | 0.02%                  | 0                               | 0bp             | 0.00%                  |
| -DIRS:                           | 5               | 1300bp          | 0.00%                  | 0                                | 0bp             | 0.00%                  | 0                               | 0bp             | 0.00%                  |
| -ERV1:                           | 2               | 446bp           | 0.00%                  | 3                                | 386bp           | 0.00%                  | 0                               | 0bp             | 0.00%                  |
| -ERVK:                           | 3               | 30bp            | 0.00%                  | 0                                | 0bp             | 0.00%                  | 0                               | 0bp             | 0.00%                  |
| -Gypsy:                          | 1076            | 319483bp        | 0.11%                  | 1627                             | 174773bp        | 0.06%                  | 0                               | 0bp             | 0.00%                  |
| -OTHER:                          | 10              | 9221bp          | 0.00%                  | 16                               | 4071bp          | 0.00%                  | 0                               | 0bp             | 0.00%                  |
| -Pao:                            | 659             | 194332bp        | 0.07%                  | 1753                             | 118390bp        | 0.04%                  | 0                               | 0bp             | 0.00%                  |
| RC:                              | 232             | 74081bp         | 0.03%                  | 55                               | 9784bp          | 0.00%                  | 0                               | 0bp             | 0.00%                  |
| -Helitron:                       | 232             | 74081bp         | 0.03%                  | 55                               | 9784bp          | 0.00%                  | 0                               | 0bp             | 0.00%                  |
| RC?:                             | 14              | 8650bp          | 0.00%                  | 0                                | 0bp             | 0.00%                  | 0                               | 0bp             | 0.00%                  |
| -Helitron:                       | 14              | 8650bp          | 0.00%                  | 0                                | 0bp             | 0.00%                  | 0                               | 0bp             | 0.00%                  |
| SINE:                            | 5               | 1124bp          | 0.00%                  | 21                               | 1716bp          | 0.00%                  | 0                               | 0bp             | 0.00%                  |
| -5S-Deu-L2:                      | 5               | 1124bp          | 0.00%                  | 14                               | 1003bp          | 0.00%                  | 0                               | 0bp             | 0.00%                  |
| -U:                              | 0               | 0bp             | 0.00%                  | 7                                | 713bp           | 0.00%                  | 0                               | 0bp             | 0.00%                  |
| Satellite:                       | 2               | 211bp           | 0.00%                  | 0                                | 0bp             | 0.00%                  | 0                               | 0bp             | 0.00%                  |
| -OTHER:                          | 2               | 211bp           | 0.00%                  | 0                                | 0bp             | 0.00%                  | 0                               | 0bp             | 0.00%                  |
| Simple:                          | 12485           | 140921bp        | 0.05%                  | 860                              | 37841bp         | 0.01%                  | 24                              | 301bp           | 0.00%                  |
| -repeat:                         | 12485           | 140921bp        | 0.05%                  | 860                              | 37841bp         | 0.01%                  | 24                              | 301bp           | 0.00%                  |
| Unknown:                         | 33083           | 3626291bp       | 1.23%                  | 23915                            | 1572343bp       | 0.53%                  | 438                             | 42945bp         | 0.01%                  |
| -OTHER:                          | 33083           | 3626291bp       | 1.23%                  | 23915                            | 1572343bp       | 0.53%                  | 438                             | 42945bp         | 0.01%                  |
| rRNA:                            | 29              | 11625bp         | 0.00%                  | 29                               | 11727bp         | 0.00%                  | 0                               | 0bp             | 0.00%                  |
| -OTHER:                          | 29              | 11625bp         | 0.00%                  | 29                               | 11727bp         | 0.00%                  | 0                               | 0bp             | 0.00%                  |
| tRNA:                            | 10              | 1098bp          | 0.00%                  | 12                               | 673bp           | 0.00%                  | 0                               | 0bp             | 0.00%                  |
| -OTHER:                          | 10              | 1098bp          | 0.00%                  | 12                               | 673bp           | 0.00%                  | 0                               | 0bp             | 0.00%                  |

Table S37. Comparison of the proportion and detailed classification of detection results generated by three tools covering the repeat regions on the reference genome of Mouse.

| LongRepMarker                      |                 |                 |                        | RepARK                            |                 |                        | Repdenovo                        |                 |                        |
|------------------------------------|-----------------|-----------------|------------------------|-----------------------------------|-----------------|------------------------|----------------------------------|-----------------|------------------------|
| sequence: 239                      |                 |                 |                        | sequence: 239                     |                 |                        | sequence: 239                    |                 |                        |
| total length: 2818974548bp         |                 |                 |                        | total length: 2818974548bp        |                 |                        | total length: 2818974548bp       |                 |                        |
| bases masked: 241946118 bp (8.58%) |                 |                 |                        | bases masked: 43289265 bp (1.54%) |                 |                        | bases masked: 4627038 bp (0.16%) |                 |                        |
| Repeat Types                       | Num of elements | Length occupied | Percentage of sequence | Num of elements                   | Length occupied | Percentage of sequence | Num of elements                  | Length occupied | Percentage of sequence |
| ARTEFACT:                          | 12              | 1751bp          | 0.00%                  | 0                                 | 0bp             | 0.00%                  | 0                                | 0bp             | 0.00%                  |
| -OTHER:                            | 12              | 1751bp          | 0.00%                  | 0                                 | 0bp             | 0.00%                  | 0                                | 0bp             | 0.00%                  |
| DNA:                               | 34942           | 4028857bp       | 0.14%                  | 2077                              | 448811bp        | 0.02%                  | 0                                | 0bp             | 0.00%                  |
| -Academ:                           | 6               | 768bp           | 0.00%                  | 0                                 | 0bp             | 0.00%                  | 0                                | 0bp             | 0.00%                  |
| -Academ-1:                         | 14              | 4288bp          | 0.00%                  | 0                                 | 0bp             | 0.00%                  | 0                                | 0bp             | 0.00%                  |
| -Academ-H:                         | 2               | 266bp           | 0.00%                  | 0                                 | 0bp             | 0.00%                  | 0                                | 0bp             | 0.00%                  |
| -CMC-Chapaev:                      | 8               | 1172bp          | 0.00%                  | 0                                 | 0bp             | 0.00%                  | 0                                | 0bp             | 0.00%                  |
| -CMC-Chapaev-3:                    | 8               | 1037bp          | 0.00%                  | 0                                 | 0bp             | 0.00%                  | 0                                | 0bp             | 0.00%                  |
| -CMC-EnSpm:                        | 12997           | 1039938bp       | 0.04%                  | 76                                | 10056bp         | 0.00%                  | 0                                | 0bp             | 0.00%                  |
| -CMC-Transib:                      | 52              | 3109bp          | 0.00%                  | 0                                 | 0bp             | 0.00%                  | 0                                | 0bp             | 0.00%                  |
| -Crypton:                          | 8               | 1193bp          | 0.00%                  | 0                                 | 0bp             | 0.00%                  | 0                                | 0bp             | 0.00%                  |
| -Crypton-A:                        | 2               | 264bp           | 0.00%                  | 0                                 | 0bp             | 0.00%                  | 0                                | 0bp             | 0.00%                  |
| -Crypton-F:                        | 54              | 2072bp          | 0.00%                  | 0                                 | 0bp             | 0.00%                  | 0                                | 0bp             | 0.00%                  |
| -Crypton-H:                        | 84              | 6710bp          | 0.00%                  | 0                                 | 0bp             | 0.00%                  | 0                                | 0bp             | 0.00%                  |
| -Crypton-S:                        | 57              | 5428bp          | 0.00%                  | 0                                 | 0bp             | 0.00%                  | 0                                | 0bp             | 0.00%                  |
| -Crypton-V:                        | 322             | 31443bp         | 0.00%                  | 0                                 | 0bp             | 0.00%                  | 0                                | 0bp             | 0.00%                  |
| -Dada:                             | 172             | 13527bp         | 0.00%                  | 0                                 | 0bp             | 0.00%                  | 0                                | 0bp             | 0.00%                  |
| -Ginger:                           | 3533            | 268998bp        | 0.01%                  | 0                                 | 0bp             | 0.00%                  | 0                                | 0bp             | 0.00%                  |
| -IS:                               | 2               | 236bp           | 0.00%                  | 0                                 | 0bp             | 0.00%                  | 0                                | 0bp             | 0.00%                  |
| -IS3EU:                            | 174             | 27978bp         | 0.00%                  | 0                                 | 0bp             | 0.00%                  | 0                                | 0bp             | 0.00%                  |
| -Kolobok:                          | 2               | 237bp           | 0.00%                  | 0                                 | 0bp             | 0.00%                  | 0                                | 0bp             | 0.00%                  |
| -Kolobok-Hydra:                    | 79              | 6450bp          | 0.00%                  | 0                                 | 0bp             | 0.00%                  | 0                                | 0bp             | 0.00%                  |
| -Kolobok-T2:                       | 183             | 11957bp         | 0.00%                  | 0                                 | 0bp             | 0.00%                  | 0                                | 0bp             | 0.00%                  |
| -MULE-MuDR:                        | 797             | 110927bp        | 0.00%                  | 50                                | 6498bp          | 0.00%                  | 0                                | 0bp             | 0.00%                  |
| -MULE-NOF:                         | 43              | 1495bp          | 0.00%                  | 0                                 | 0bp             | 0.00%                  | 0                                | 0bp             | 0.00%                  |
| -Maverick:                         | 167             | 41376bp         | 0.00%                  | 0                                 | 0bp             | 0.00%                  | 0                                | 0bp             | 0.00%                  |
| -Merlin:                           | 10              | 1328bp          | 0.00%                  | 0                                 | 0bp             | 0.00%                  | 0                                | 0bp             | 0.00%                  |
| -MuLE-F:                           | 7               | 430bp           | 0.00%                  | 0                                 | 0bp             | 0.00%                  | 0                                | 0bp             | 0.00%                  |
| -MuLE-MuDR:                        | 22              | 6205bp          | 0.00%                  | 22                                | 3596bp          | 0.00%                  | 0                                | 0bp             | 0.00%                  |
| -MuLE-NOF:                         | 12              | 590bp           | 0.00%                  | 0                                 | 0bp             | 0.00%                  | 0                                | 0bp             | 0.00%                  |
| -MuLE-NOF?:                        | 10              | 405bp           | 0.00%                  | 0                                 | 0bp             | 0.00%                  | 0                                | 0bp             | 0.00%                  |
| -Novosib:                          | 660             | 69877bp         | 0.00%                  | 0                                 | 0bp             | 0.00%                  | 0                                | 0bp             | 0.00%                  |
| -OTHER:                            | 1593            | 133807bp        | 0.00%                  | 15                                | 468bp           | 0.00%                  | 0                                | 0bp             | 0.00%                  |
| -P:                                | 31              | 2928bp          | 0.00%                  | 0                                 | 0bp             | 0.00%                  | 0                                | 0bp             | 0.00%                  |
| -P-Fungi:                          | 15              | 624bp           | 0.00%                  | 0                                 | 0bp             | 0.00%                  | 0                                | 0bp             | 0.00%                  |
| -PIF-Harbinger:                    | 699             | 62618bp         | 0.00%                  | 0                                 | 0bp             | 0.00%                  | 0                                | 0bp             | 0.00%                  |
| -PIF-ISL2EU:                       | 27              | 8105bp          | 0.00%                  | 16                                | 5937bp          | 0.00%                  | 0                                | 0bp             | 0.00%                  |
| -PIF-Spy:                          | 18              | 995bp           | 0.00%                  | 0                                 | 0bp             | 0.00%                  | 0                                | 0bp             | 0.00%                  |
| -PiggyBac:                         | 48              | 22828bp         | 0.00%                  | 14                                | 10924bp         | 0.00%                  | 0                                | 0bp             | 0.00%                  |
| -PiggyBac-X:                       | 10              | 1471bp          | 0.00%                  | 0                                 | 0bp             | 0.00%                  | 0                                | 0bp             | 0.00%                  |
| -Sola-1:                           | 321             | 32376bp         | 0.00%                  | 0                                 | 0bp             | 0.00%                  | 0                                | 0bp             | 0.00%                  |
| -Sola-2:                           | 25              | 1172bp          | 0.00%                  | 0                                 | 0bp             | 0.00%                  | 0                                | 0bp             | 0.00%                  |
| -Sola-3:                           | 214             | 25782bp         | 0.00%                  | 0                                 | 0bp             | 0.00%                  | 0                                | 0bp             | 0.00%                  |
| -TcMar:                            | 7               | 881bp           | 0.00%                  | 0                                 | 0bp             | 0.00%                  | 0                                | 0bp             | 0.00%                  |
| -TcMar-Ant1:                       | 16              | 3167bp          | 0.00%                  | 0                                 | 0bp             | 0.00%                  | 0                                | 0bp             | 0.00%                  |
| -TcMar-Fot1:                       | 58              | 2958bp          | 0.00%                  | 0                                 | 0bp             | 0.00%                  | 0                                | 0bp             | 0.00%                  |
| -TcMar-ISRm11:                     | 30              | 6128bp          | 0.00%                  | 12                                | 903bp           | 0.00%                  | 0                                | 0bp             | 0.00%                  |
| -TcMar-Mariner:                    | 62              | 8818bp          | 0.00%                  | 0                                 | 0bp             | 0.00%                  | 0                                | 0bp             | 0.00%                  |
| -TcMar-Pogo:                       | 4               | 586bp           | 0.00%                  | 0                                 | 0bp             | 0.00%                  | 0                                | 0bp             | 0.00%                  |
| -TcMar-Sagan:                      | 3               | 459bp           | 0.00%                  | 0                                 | 0bp             | 0.00%                  | 0                                | 0bp             | 0.00%                  |
| -TcMar-Stowaway:                   | 6               | 3330bp          | 0.00%                  | 0                                 | 0bp             | 0.00%                  | 0                                | 0bp             | 0.00%                  |
| -TcMar-Tc1:                        | 696             | 61841bp         | 0.00%                  | 30                                | 4344bp          | 0.00%                  | 0                                | 0bp             | 0.00%                  |
| -TcMar-Tc2:                        | 78              | 8056bp          | 0.00%                  | 0                                 | 0bp             | 0.00%                  | 0                                | 0bp             | 0.00%                  |
| -TcMar-Tc4:                        | 4               | 706bp           | 0.00%                  | 0                                 | 0bp             | 0.00%                  | 0                                | 0bp             | 0.00%                  |
| -TcMar-Tigger:                     | 2122            | 275507bp        | 0.01%                  | 117                               | 23364bp         | 0.00%                  | 0                                | 0bp             | 0.00%                  |
| -Zisupton:                         | 778             | 80877bp         | 0.00%                  | 17                                | 4063bp          | 0.00%                  | 0                                | 0bp             | 0.00%                  |
| -hAT:                              | 34              | 7935bp          | 0.00%                  | 8                                 | 1549bp          | 0.00%                  | 0                                | 0bp             | 0.00%                  |
| -hAT-Ac:                           | 733             | 66700bp         | 0.00%                  | 83                                | 6542bp          | 0.00%                  | 0                                | 0bp             | 0.00%                  |
| -hAT-Blackjack:                    | 133             | 11853bp         | 0.00%                  | 17                                | 2900bp          | 0.00%                  | 0                                | 0bp             | 0.00%                  |
| -hAT-Charlie:                      | 6983            | 1496302bp       | 0.05%                  | 1517                              | 351264bp        | 0.01%                  | 0                                | 0bp             | 0.00%                  |
| -hAT-Pegasus:                      | 44              | 3084bp          | 0.00%                  | 0                                 | 0bp             | 0.00%                  | 0                                | 0bp             | 0.00%                  |
| -hAT-Tag1:                         | 90              | 9760bp          | 0.00%                  | 0                                 | 0bp             | 0.00%                  | 0                                | 0bp             | 0.00%                  |
| -hAT-Tip100:                       | 435             | 74834bp         | 0.00%                  | 83                                | 16403bp         | 0.00%                  | 0                                | 0bp             | 0.00%                  |
| -hAT-hAT19:                        | 4               | 531bp           | 0.00%                  | 0                                 | 0bp             | 0.00%                  | 0                                | 0bp             | 0.00%                  |
| -hAT-hATm:                         | 101             | 6526bp          | 0.00%                  | 0                                 | 0bp             | 0.00%                  | 0                                | 0bp             | 0.00%                  |
| -hAT-hATw:                         | 31              | 674bp           | 0.00%                  | 0                                 | 0bp             | 0.00%                  | 0                                | 0bp             | 0.00%                  |
| -hAT-hobo:                         | 2               | 255bp           | 0.00%                  | 0                                 | 0bp             | 0.00%                  | 0                                | 0bp             | 0.00%                  |
| DNA?:                              | 6               | 728bp           | 0.00%                  | 0                                 | 0bp             | 0.00%                  | 0                                | 0bp             | 0.00%                  |
| -PiggyBac:                         | 4               | 479bp           | 0.00%                  | 0                                 | 0bp             | 0.00%                  | 0                                | 0bp             | 0.00%                  |
| -hAT:                              | 2               | 249bp           | 0.00%                  | 0                                 | 0bp             | 0.00%                  | 0                                | 0bp             | 0.00%                  |
| LINE:                              | 1739539         | 121108544bp     | 4.30%                  | 148672                            | 10063402bp      | 0.36%                  | 10924                            | 4148162bp       | 0.15%                  |
| -CR1:                              | 231             | 59988bp         | 0.00%                  | 9                                 | 563bp           | 0.00%                  | 0                                | 0bp             | 0.00%                  |
| -CR1-Zenon:                        | 2               | 376bp           | 0.00%                  | 0                                 | 0bp             | 0.00%                  | 0                                | 0bp             | 0.00%                  |
| -CRE-Ambal:                        | 35              | 1485bp          | 0.00%                  | 13                                | 693bp           | 0.00%                  | 0                                | 0bp             | 0.00%                  |
| -CRE-Odin:                         | 2               | 244bp           | 0.00%                  | 0                                 | 0bp             | 0.00%                  | 0                                | 0bp             | 0.00%                  |
| -Dong-R4:                          | 8               | 857bp           | 0.00%                  | 0                                 | 0bp             | 0.00%                  | 0                                | 0bp             | 0.00%                  |
| -Dualaen:                          | 2               | 1562bp          | 0.00%                  | 0                                 | 0bp             | 0.00%                  | 0                                | 0bp             | 0.00%                  |
| -I:                                | 37              | 5332bp          | 0.00%                  | 0                                 | 0bp             | 0.00%                  | 0                                | 0bp             | 0.00%                  |
| -I-Jockey:                         | 375             | 29273bp         | 0.00%                  | 0                                 | 0bp             | 0.00%                  | 0                                | 0bp             | 0.00%                  |
| -Jockey:                           | 2               | 270bp           | 0.00%                  | 0                                 | 0bp             | 0.00%                  | 0                                | 0bp             | 0.00%                  |
| -L1:                               | 1732439         | 120039364bp     | 4.26%                  | 148373                            | 9997561bp       | 0.35%                  | 10924                            | 4148162bp       | 0.15%                  |
| -L1-Tx1:                           | 217             | 90021bp         | 0.00%                  | 0                                 | 0bp             | 0.00%                  | 0                                | 0bp             | 0.00%                  |
| -L2:                               | 5026            | 652714bp        | 0.02%                  | 139                               | 24633bp         | 0.00%                  | 0                                | 0bp             | 0.00%                  |
| -OTHER:                            | 60              | 11132bp         | 0.00%                  | 0                                 | 0bp             | 0.00%                  | 0                                | 0bp             | 0.00%                  |
| -Penelope:                         | 189             | 24121bp         | 0.00%                  | 0                                 | 0bp             | 0.00%                  | 0                                | 0bp             | 0.00%                  |
| -R1:                               | 147             | 26313bp         | 0.00%                  | 73                                | 24237bp         | 0.00%                  | 0                                | 0bp             | 0.00%                  |
| -R1-LOA:                           | 8               | 1972bp          | 0.00%                  | 0                                 | 0bp             | 0.00%                  | 0                                | 0bp             | 0.00%                  |
| -R2:                               | 115             | 23063bp         | 0.00%                  | 0                                 | 0bp             | 0.00%                  | 0                                | 0bp             | 0.00%                  |
| -R2-NeSL:                          | 0               | 0bp             | 0.00%                  | 24                                | 12405bp         | 0.00%                  | 0                                | 0bp             | 0.00%                  |
| -RTE-BovB:                         | 442             | 115547bp        | 0.00%                  | 20                                | 1638bp          | 0.00%                  | 0                                | 0bp             | 0.00%                  |
| -RTE-RTE:                          | 4               | 1210bp          | 0.00%                  | 0                                 | 0bp             | 0.00%                  | 0                                | 0bp             | 0.00%                  |
| -RTE-X:                            | 130             | 21757bp         | 0.00%                  | 11                                | 412bp           | 0.00%                  | 0                                | 0bp             | 0.00%                  |
| -Rex-Babar:                        | 52              | 4211bp          | 0.00%                  | 10                                | 1260bp          | 0.00%                  | 0                                | 0bp             | 0.00%                  |
| -Tad1:                             | 16              | 1889bp          | 0.00%                  | 0                                 | 0bp             | 0.00%                  | 0                                | 0bp             | 0.00%                  |
| LINE?:                             | 4               | 484bp           | 0.00%                  | 0                                 | 0bp             | 0.00%                  | 0                                | 0bp             | 0.00%                  |
| -Penelope:                         | 4               | 484bp           | 0.00%                  | 0                                 | 0bp             | 0.00%                  | 0                                | 0bp             | 0.00%                  |
| LTR:                               | 240965          | 32960648bp      | 1.17%                  | 176053                            | 14027673bp      | 0.50%                  | 995                              | 299622bp        | 0.01%                  |
| -Caulimovirus:                     | 79              | 5495bp          | 0.00%                  | 0                                 | 0bp             | 0.00%                  | 0                                | 0bp             | 0.00%                  |
| -Copia:                            | 1012            | 125717bp        | 0.00%                  | 133                               | 25564bp         | 0.00%                  | 0                                | 0bp             | 0.00%                  |
| -DIRS:                             | 99              | 24377bp         | 0.00%                  | 22                                | 8037bp          | 0.00%                  | 0                                | 0bp             | 0.00%                  |
| -ERV:                              | 19              | 6057bp          | 0.00%                  | 53                                | 25048bp         | 0.00%                  | 0                                | 0bp             | 0.00%                  |
| -ERV-Lenti:                        | 13              | 501bp           | 0.00%                  | 0                                 | 0bp             | 0.00%                  | 0                                | 0bp             | 0.00%                  |
| -ERV1:                             | 13699           | 4272539bp       | 0.15%                  | 27191                             | 2458001bp       | 0.09%                  | 0                                | 0bp             | 0.00%                  |
| -ERV4:                             | 18              | 2675bp          | 0.00%                  | 0                                 | 0bp             | 0.00%                  | 0                                | 0bp             | 0.00%                  |
| -ERVK:                             | 128277          | 17468583bp      | 0.62%                  | 113800                            | 8105149bp       | 0.29%                  | 608                              | 170732bp        | 0.01%                  |
| -ERVL:                             | 19834           | 2729119bp       | 0.10%                  | 15597                             | 1562477bp       | 0.06%                  | 102                              | 53928bp         | 0.00%                  |
| -ERVL-MaLR:                        | 74009           | 7983613bp       | 0.28%                  | 18974                             | 1796104bp       | 0.06%                  | 285                              | 74962bp         | 0.00%                  |
| -Gypsy:                            | 3307            | 335974bp        | 0.01%                  | 213                               | 53713bp         | 0.00%                  | 0                                | 0bp             | 0.00%                  |
| -Ngaro:                            | 82              | 9689bp          | 0.00%                  | 0                                 | 0bp             | 0.00%                  | 0                                | 0bp             | 0.00%                  |
| -OTHER:                            | 128             | 19268bp         | 0.00%                  | 0                                 | 0bp             | 0.00%                  | 0                                | 0bp             | 0.00%                  |
| -Pao:                              | 389             | 66375bp         | 0.00%                  | 70                                | 9991bp          | 0.00%                  | 0                                | 0bp             | 0.00%                  |
| Other:                             | 2912            | 418467bp        | 0.01%                  | 533                               | 69425bp         | 0.00%                  | 0                                | 0bp             | 0.00%                  |
| -OTHER:                            | 2912            | 418467bp        | 0.01%                  | 533                               | 69425bp         | 0.00%                  | 0                                | 0bp             | 0.00%                  |
| RC:                                | 1056            | 97924bp         | 0.00%                  | 4                                 | 184bp           | 0.00%                  | 0                                | 0bp             | 0.00%                  |
| -Helitron:                         | 1054            | 97549bp         | 0.00%                  | 4                                 | 184bp           | 0.00%                  | 0                                | 0bp             | 0.00%                  |
| -Helitron-2:                       | 2               | 375bp           | 0.00%                  | 0                                 | 0bp             | 0.00%                  | 0                                | 0bp             | 0.00%                  |
| RNA:                               | 15              | 2131bp          | 0.00%                  | 0                                 | 0bp             | 0.00%                  | 0                                | 0bp             | 0.00%                  |
| -OTHER:                            | 15              | 2131bp          | 0.00%                  | 0                                 | 0bp             | 0.00%                  | 0                                | 0bp             | 0.00%                  |
| Retroposon:                        | 16              | 1823bp          | 0.00%                  | 0                                 | 0bp             | 0.00%                  | 0                                | 0bp             | 0.00%                  |
| -SVA:                              | 16              | 1823bp          | 0.00%                  | 0                                 | 0bp             | 0.00%                  | 0                                | 0bp             | 0.00%                  |
| SINE:                              | 182926          | 23961883bp      | 0.85%                  | 18093                             | 2829668bp       | 0.10%                  | 173                              | 18049bp         | 0.00%                  |
| -S:                                | 80              | 26799bp         | 0.00%                  | 92                                | 7421bp          | 0.00%                  | 0                                | 0bp             | 0.00%                  |
| -S-Deu-L2:                         | 4               | 481bp           | 0.00%                  | 0                                 | 0bp             | 0.00%                  | 0                                | 0bp             | 0.00%                  |
| -S-Sauria-RTE:                     | 4               | 488bp           | 0.00%                  | 0                                 | 0bp             | 0.00%                  | 0                                | 0bp             | 0.00%                  |
| -7SL:                              | 262             | 55265bp         | 0.00%                  | 21                                | 5203bp          | 0.00%                  | 0                                | 0bp             | 0.00%                  |
| -Alu:                              | 111026          | 14163827bp      | 0.50%                  | 8150                              | 1373906bp       | 0.05%                  | 80                               | 8502bp          | 0.00%                  |
| -B2:                               | 48480           | 6570506bp       | 0.23%                  | 6707                              | 883087bp        | 0.03%                  | 93                               | 9547bp          | 0.00%                  |
| -B4:                               | 18023           | 2465836bp       | 0.09%                  | 2283                              | 407923bp        | 0.01%                  | 0                                | 0bp             | 0.00%                  |
| -ID:                               | 3694            | 597285bp        | 0.02%                  | 626                               | 120052bp        | 0.00%                  | 0                                | 0bp             | 0.00%                  |
| -MIR:                              | 1098            | 142144bp        | 0.01%                  | 99                                | 19356bp         | 0.00%                  | 0                                | 0bp             | 0.00%                  |
| -OTHER:                            | 2               | 463bp           | 0.00%                  | 0                                 | 0bp             | 0.00%                  | 0                                | 0bp             | 0.00%                  |
| -U:                                | 6               | 2881bp          | 0.00%                  | 19                                | 1339bp          | 0.00%                  | 0                                | 0bp             | 0.00%                  |
| -tRNA:                             | 130             | 30450bp         | 0.00%                  | 37                                | 2139bp          | 0.00%                  | 0                                | 0bp             | 0.00%                  |
| -tRNA-7SL:                         | 105             | 10241bp         | 0.00%                  | 59                                | 13961bp         | 0.00%                  | 0                                | 0bp             | 0.00%                  |
| -tRNA-Core-L2:                     | 8               | 754bp           | 0.00%                  | 0                                 | 0bp             | 0.00%                  | 0                                | 0bp             | 0.00%                  |
| -tRNA-Core-RTE:                    | 4               | 540bp           | 0.00%                  | 0                                 | 0bp             | 0.00%                  | 0                                | 0bp             | 0.00%                  |
| Satellite:                         | 1256869         | 1223315bp       | 0.04%                  | 6069                              |                 |                        |                                  |                 |                        |

**Table S38. Comparison of the proportion and detailed classification of detection results generated by three tools covering the repeat regions on the reference genome of Human-chr14.**

| LongRepMarker                                                                |                 |                 |                        | RepARK                                                                      |                 |                        | Repdenovo                                                                   |                 |                        |
|------------------------------------------------------------------------------|-----------------|-----------------|------------------------|-----------------------------------------------------------------------------|-----------------|------------------------|-----------------------------------------------------------------------------|-----------------|------------------------|
| sequence: 1<br>total length: 107349540bp<br>bases masked: 5730369 bp (5.34%) |                 |                 |                        | sequence: 1<br>total length: 107349540bp<br>bases masked: 549065 bp (0.51%) |                 |                        | sequence: 1<br>total length: 107349540bp<br>bases masked: 191540 bp (0.18%) |                 |                        |
| Repeat Types                                                                 | Num of elements | Length occupied | Percentage of sequence | Num of elements                                                             | Length occupied | Percentage of sequence | Num of elements                                                             | Length occupied | Percentage of sequence |
| DNA:                                                                         | 828             | 74218bp         | 0.07%                  | 100                                                                         | 6861bp          | 0.01%                  | 0                                                                           | 0bp             | 0.00%                  |
| -CMC-EnSpm:                                                                  | 490             | 11478bp         | 0.01%                  | 10                                                                          | 260bp           | 0.00%                  | 0                                                                           | 0bp             | 0.00%                  |
| -Ginger:                                                                     | 16              | 2557bp          | 0.00%                  | 0                                                                           | 0bp             | 0.00%                  | 0                                                                           | 0bp             | 0.00%                  |
| -MULE-MuDR:                                                                  | 8               | 490bp           | 0.00%                  | 0                                                                           | 0bp             | 0.00%                  | 0                                                                           | 0bp             | 0.00%                  |
| -MuLE-MuDR:                                                                  | 8               | 739bp           | 0.00%                  | 0                                                                           | 0bp             | 0.00%                  | 0                                                                           | 0bp             | 0.00%                  |
| -Novosib:                                                                    | 6               | 1039bp          | 0.00%                  | 0                                                                           | 0bp             | 0.00%                  | 0                                                                           | 0bp             | 0.00%                  |
| -OTHER:                                                                      | 3               | 371bp           | 0.00%                  | 0                                                                           | 0bp             | 0.00%                  | 0                                                                           | 0bp             | 0.00%                  |
| -PIF-Harbinger:                                                              | 10              | 1559bp          | 0.00%                  | 0                                                                           | 0bp             | 0.00%                  | 0                                                                           | 0bp             | 0.00%                  |
| -PiggyBac:                                                                   | 0               | 0bp             | 0.00%                  | 4                                                                           | 302bp           | 0.00%                  | 0                                                                           | 0bp             | 0.00%                  |
| -Sola-1:                                                                     | 6               | 2719bp          | 0.00%                  | 4                                                                           | 578bp           | 0.00%                  | 0                                                                           | 0bp             | 0.00%                  |
| -Sola-3:                                                                     | 10              | 2172bp          | 0.00%                  | 0                                                                           | 0bp             | 0.00%                  | 0                                                                           | 0bp             | 0.00%                  |
| -TcMar-Tc1:                                                                  | 10              | 1966bp          | 0.00%                  | 0                                                                           | 0bp             | 0.00%                  | 0                                                                           | 0bp             | 0.00%                  |
| -TcMar-Tc2:                                                                  | 6               | 1243bp          | 0.00%                  | 0                                                                           | 0bp             | 0.00%                  | 0                                                                           | 0bp             | 0.00%                  |
| -TcMar-Tigger:                                                               | 148             | 29829bp         | 0.03%                  | 53                                                                          | 2760bp          | 0.00%                  | 0                                                                           | 0bp             | 0.00%                  |
| -Zisupton:                                                                   | 19              | 620bp           | 0.00%                  | 0                                                                           | 0bp             | 0.00%                  | 0                                                                           | 0bp             | 0.00%                  |
| -hAT-Ac:                                                                     | 27              | 348bp           | 0.00%                  | 0                                                                           | 0bp             | 0.00%                  | 0                                                                           | 0bp             | 0.00%                  |
| -hAT-Blackjack:                                                              | 2               | 213bp           | 0.00%                  | 0                                                                           | 0bp             | 0.00%                  | 0                                                                           | 0bp             | 0.00%                  |
| -hAT-Charlie:                                                                | 55              | 17063bp         | 0.02%                  | 25                                                                          | 2415bp          | 0.00%                  | 0                                                                           | 0bp             | 0.00%                  |
| -hAT-Tag1:                                                                   | 2               | 240bp           | 0.00%                  | 0                                                                           | 0bp             | 0.00%                  | 0                                                                           | 0bp             | 0.00%                  |
| -hAT-Tip100:                                                                 | 2               | 247bp           | 0.00%                  | 4                                                                           | 546bp           | 0.00%                  | 0                                                                           | 0bp             | 0.00%                  |
| LINE:                                                                        | 613297          | 2758108bp       | 2.57%                  | 3483                                                                        | 238481bp        | 0.22%                  | 171                                                                         | 183424bp        | 0.17%                  |
| -CR1:                                                                        | 4               | 240bp           | 0.00%                  | 4                                                                           | 206bp           | 0.00%                  | 0                                                                           | 0bp             | 0.00%                  |
| -L1:                                                                         | 612996          | 2712943bp       | 2.53%                  | 3447                                                                        | 235647bp        | 0.22%                  | 171                                                                         | 183424bp        | 0.17%                  |
| -L2:                                                                         | 267             | 33331bp         | 0.03%                  | 32                                                                          | 2628bp          | 0.00%                  | 0                                                                           | 0bp             | 0.00%                  |
| -OTHER:                                                                      | 8               | 8930bp          | 0.01%                  | 0                                                                           | 0bp             | 0.00%                  | 0                                                                           | 0bp             | 0.00%                  |
| -Penelope:                                                                   | 16              | 724bp           | 0.00%                  | 0                                                                           | 0bp             | 0.00%                  | 0                                                                           | 0bp             | 0.00%                  |
| -R2-NeSL:                                                                    | 6               | 1940bp          | 0.00%                  | 0                                                                           | 0bp             | 0.00%                  | 0                                                                           | 0bp             | 0.00%                  |
| LTR:                                                                         | 1733            | 257330bp        | 0.24%                  | 1070                                                                        | 81337bp         | 0.08%                  | 15                                                                          | 1014bp          | 0.00%                  |
| -Copia:                                                                      | 36              | 1919bp          | 0.00%                  | 0                                                                           | 0bp             | 0.00%                  | 0                                                                           | 0bp             | 0.00%                  |
| -ERV:                                                                        | 4               | 606bp           | 0.00%                  | 0                                                                           | 0bp             | 0.00%                  | 0                                                                           | 0bp             | 0.00%                  |
| -ERV1:                                                                       | 978             | 129105bp        | 0.12%                  | 642                                                                         | 44995bp         | 0.04%                  | 0                                                                           | 0bp             | 0.00%                  |
| -ERVK:                                                                       | 191             | 34933bp         | 0.03%                  | 127                                                                         | 8215bp          | 0.01%                  | 0                                                                           | 0bp             | 0.00%                  |
| -ERVL:                                                                       | 210             | 35160bp         | 0.03%                  | 100                                                                         | 6899bp          | 0.01%                  | 0                                                                           | 0bp             | 0.00%                  |
| -ERVL-MaLR:                                                                  | 233             | 47102bp         | 0.04%                  | 199                                                                         | 21198bp         | 0.02%                  | 15                                                                          | 1014bp          | 0.00%                  |
| -Gypsy:                                                                      | 75              | 8015bp          | 0.01%                  | 2                                                                           | 122bp           | 0.00%                  | 0                                                                           | 0bp             | 0.00%                  |
| -OTHER:                                                                      | 2               | 235bp           | 0.00%                  | 0                                                                           | 0bp             | 0.00%                  | 0                                                                           | 0bp             | 0.00%                  |
| -Pao:                                                                        | 4               | 470bp           | 0.00%                  | 0                                                                           | 0bp             | 0.00%                  | 0                                                                           | 0bp             | 0.00%                  |
| RC:                                                                          | 54              | 2155bp          | 0.00%                  | 0                                                                           | 0bp             | 0.00%                  | 0                                                                           | 0bp             | 0.00%                  |
| -Helitron:                                                                   | 54              | 2155bp          | 0.00%                  | 0                                                                           | 0bp             | 0.00%                  | 0                                                                           | 0bp             | 0.00%                  |
| Retroposon:                                                                  | 959             | 44352bp         | 0.04%                  | 212                                                                         | 17536bp         | 0.02%                  | 11                                                                          | 1624bp          | 0.00%                  |
| -SVA:                                                                        | 959             | 44352bp         | 0.04%                  | 212                                                                         | 17536bp         | 0.02%                  | 11                                                                          | 1624bp          | 0.00%                  |
| SINE:                                                                        | 128817          | 1964602bp       | 1.83%                  | 931                                                                         | 54659bp         | 0.05%                  | 35                                                                          | 4688bp          | 0.00%                  |
| -Alu:                                                                        | 128739          | 1935008bp       | 1.80%                  | 907                                                                         | 52591bp         | 0.05%                  | 35                                                                          | 4688bp          | 0.00%                  |
| -MIR:                                                                        | 78              | 29742bp         | 0.03%                  | 24                                                                          | 2068bp          | 0.00%                  | 0                                                                           | 0bp             | 0.00%                  |
| Satellite:                                                                   | 734             | 66331bp         | 0.06%                  | 172                                                                         | 9959bp          | 0.01%                  | 8                                                                           | 593bp           | 0.00%                  |
| -OTHER:                                                                      | 269             | 24198bp         | 0.02%                  | 30                                                                          | 1374bp          | 0.00%                  | 0                                                                           | 0bp             | 0.00%                  |
| -Y-chromosome:                                                               | 14              | 2200bp          | 0.00%                  | 15                                                                          | 921bp           | 0.00%                  | 0                                                                           | 0bp             | 0.00%                  |
| -centromeric:                                                                | 443             | 37500bp         | 0.03%                  | 107                                                                         | 5776bp          | 0.01%                  | 8                                                                           | 593bp           | 0.00%                  |
| -telomeric:                                                                  | 8               | 2688bp          | 0.00%                  | 20                                                                          | 2162bp          | 0.00%                  | 0                                                                           | 0bp             | 0.00%                  |
| Simple:                                                                      | 21446           | 249378bp        | 0.23%                  | 345                                                                         | 11739bp         | 0.01%                  | 0                                                                           | 0bp             | 0.00%                  |
| -repeat:                                                                     | 21446           | 249378bp        | 0.23%                  | 345                                                                         | 11739bp         | 0.01%                  | 0                                                                           | 0bp             | 0.00%                  |
| Unknown:                                                                     | 7179            | 409303bp        | 0.38%                  | 2182                                                                        | 128714bp        | 0.12%                  | 2                                                                           | 197bp           | 0.00%                  |
| -OTHER:                                                                      | 7179            | 409303bp        | 0.38%                  | 2182                                                                        | 128714bp        | 0.12%                  | 2                                                                           | 197bp           | 0.00%                  |
| rRNA:                                                                        | 0               | 0bp             | 0.00%                  | 2                                                                           | 116bp           | 0.00%                  | 0                                                                           | 0bp             | 0.00%                  |
| -OTHER:                                                                      | 0               | 0bp             | 0.00%                  | 2                                                                           | 116bp           | 0.00%                  | 0                                                                           | 0bp             | 0.00%                  |
| snRNA:                                                                       | 2               | 284bp           | 0.00%                  | 0                                                                           | 0bp             | 0.00%                  | 0                                                                           | 0bp             | 0.00%                  |
| -OTHER:                                                                      | 2               | 284bp           | 0.00%                  | 0                                                                           | 0bp             | 0.00%                  | 0                                                                           | 0bp             | 0.00%                  |

Table S39. Comparison of the proportion and detailed classification of detection results generated by three tools covering the repeat regions on the reference genome of Human(hg38).

| LongRepMarker                      |       |                 |                 | RepARK                            |                 |                 | Repdenovo                        |                 |                 |                        |
|------------------------------------|-------|-----------------|-----------------|-----------------------------------|-----------------|-----------------|----------------------------------|-----------------|-----------------|------------------------|
| sequence: 455                      |       |                 |                 | sequence: 455                     |                 |                 | sequence: 455                    |                 |                 |                        |
| total length: 3209286105bp         |       |                 |                 | total length: 3209286105bp        |                 |                 | total length: 3209286105bp       |                 |                 |                        |
| bases masked: 147019720 bp (4.58%) |       |                 |                 | bases masked: 50576113 bp (1.58%) |                 |                 | bases masked: 7539026 bp (0.23%) |                 |                 |                        |
| Repeat                             | Types | Num of elements | Length occupied | Percentage of sequence            | Num of elements | Length occupied | Percentage of sequence           | Num of elements | Length occupied | Percentage of sequence |
| <b>DNA:</b>                        |       | 22247           | 3083222bp       | 0.10%                             | 12587           | 1576732bp       | 0.05%                            | 0               | 0bp             | 0.00%                  |
| -Academ-1:                         |       | 63              | 167248bp        | 0.01%                             | 44              | 3395bp          | 0.00%                            | 0               | 0bp             | 0.00%                  |
| -CMC-Chapaev:                      |       | 4               | 878bp           | 0.00%                             | 0               | 0bp             | 0.00%                            | 0               | 0bp             | 0.00%                  |
| -CMC-EnSpm:                        |       | 8427            | 422704bp        | 0.01%                             | 190             | 24218bp         | 0.00%                            | 0               | 0bp             | 0.00%                  |
| -CMC-Transib:                      |       | 17              | 2035bp          | 0.00%                             | 0               | 0bp             | 0.00%                            | 0               | 0bp             | 0.00%                  |
| -Crypton-H:                        |       | 246             | 17570bp         | 0.00%                             | 7               | 206bp           | 0.00%                            | 0               | 0bp             | 0.00%                  |
| -Crypton-V:                        |       | 2               | 631bp           | 0.00%                             | 21              | 4403bp          | 0.00%                            | 0               | 0bp             | 0.00%                  |
| -Dada:                             |       | 21              | 1323bp          | 0.00%                             | 0               | 0bp             | 0.00%                            | 0               | 0bp             | 0.00%                  |
| -Ginger:                           |       | 971             | 80111bp         | 0.00%                             | 0               | 0bp             | 0.00%                            | 0               | 0bp             | 0.00%                  |
| -IS3EU:                            |       | 31              | 1150bp          | 0.00%                             | 0               | 0bp             | 0.00%                            | 0               | 0bp             | 0.00%                  |
| -Kolobok:                          |       | 6               | 894bp           | 0.00%                             | 0               | 0bp             | 0.00%                            | 0               | 0bp             | 0.00%                  |
| -Kolobok-Hydra:                    |       | 4               | 769bp           | 0.00%                             | 0               | 0bp             | 0.00%                            | 0               | 0bp             | 0.00%                  |
| -Kolobok-T2:                       |       | 16              | 1288bp          | 0.00%                             | 22              | 3454bp          | 0.00%                            | 0               | 0bp             | 0.00%                  |
| -MULE-MuDR:                        |       | 405             | 52301bp         | 0.00%                             | 591             | 45645bp         | 0.00%                            | 0               | 0bp             | 0.00%                  |
| -MULE-NOF:                         |       | 6               | 915bp           | 0.00%                             | 0               | 0bp             | 0.00%                            | 0               | 0bp             | 0.00%                  |
| -Maverick:                         |       | 41              | 3734bp          | 0.00%                             | 0               | 0bp             | 0.00%                            | 0               | 0bp             | 0.00%                  |
| -Merlin:                           |       | 2               | 471bp           | 0.00%                             | 0               | 0bp             | 0.00%                            | 0               | 0bp             | 0.00%                  |
| -MuLE-MuDR:                        |       | 4               | 804bp           | 0.00%                             | 17              | 19219bp         | 0.00%                            | 0               | 0bp             | 0.00%                  |
| -Novosib:                          |       | 471             | 64506bp         | 0.00%                             | 0               | 0bp             | 0.00%                            | 0               | 0bp             | 0.00%                  |
| -OTHER:                            |       | 191             | 25705bp         | 0.00%                             | 29              | 14236bp         | 0.00%                            | 0               | 0bp             | 0.00%                  |
| -P:                                |       | 19              | 2086bp          | 0.00%                             | 0               | 0bp             | 0.00%                            | 0               | 0bp             | 0.00%                  |
| -P-Fungi:                          |       | 2               | 417bp           | 0.00%                             | 0               | 0bp             | 0.00%                            | 0               | 0bp             | 0.00%                  |
| -PIF-Harbinger:                    |       | 131             | 15044bp         | 0.00%                             | 0               | 0bp             | 0.00%                            | 0               | 0bp             | 0.00%                  |
| -PiggyBac:                         |       | 69              | 22615bp         | 0.00%                             | 99              | 7503bp          | 0.00%                            | 0               | 0bp             | 0.00%                  |
| -PiggyBac-X:                       |       | 0               | 0bp             | 0.00%                             | 10              | 640bp           | 0.00%                            | 0               | 0bp             | 0.00%                  |
| -Sola-1:                           |       | 92              | 6418bp          | 0.00%                             | 12              | 2508bp          | 0.00%                            | 0               | 0bp             | 0.00%                  |
| -Sola-2:                           |       | 37              | 2992bp          | 0.00%                             | 0               | 0bp             | 0.00%                            | 0               | 0bp             | 0.00%                  |
| -Sola-3:                           |       | 116             | 23940bp         | 0.00%                             | 0               | 0bp             | 0.00%                            | 0               | 0bp             | 0.00%                  |
| -TcMar-Fot1:                       |       | 264             | 11590bp         | 0.00%                             | 0               | 0bp             | 0.00%                            | 0               | 0bp             | 0.00%                  |
| -TcMar-Mariner:                    |       | 484             | 113110bp        | 0.00%                             | 379             | 101174bp        | 0.00%                            | 0               | 0bp             | 0.00%                  |
| -TcMar-Tc1:                        |       | 228             | 25853bp         | 0.00%                             | 55              | 5227bp          | 0.00%                            | 0               | 0bp             | 0.00%                  |
| -TcMar-Tc2:                        |       | 135             | 28407bp         | 0.00%                             | 106             | 10915bp         | 0.00%                            | 0               | 0bp             | 0.00%                  |
| -TcMar-Tigger:                     |       | 3545            | 783065bp        | 0.02%                             | 5800            | 567017bp        | 0.02%                            | 0               | 0bp             | 0.00%                  |
| -Zisupton:                         |       | 382             | 62163bp         | 0.00%                             | 34              | 8472bp          | 0.00%                            | 0               | 0bp             | 0.00%                  |
| -hAT:                              |       | 55              | 4977bp          | 0.00%                             | 15              | 808bp           | 0.00%                            | 0               | 0bp             | 0.00%                  |
| -hAT-Ac:                           |       | 134             | 22225bp         | 0.00%                             | 60              | 5422bp          | 0.00%                            | 0               | 0bp             | 0.00%                  |
| -hAT-Blackjack:                    |       | 184             | 30609bp         | 0.00%                             | 82              | 9624bp          | 0.00%                            | 0               | 0bp             | 0.00%                  |
| -hAT-Charlie:                      |       | 4346            | 909988bp        | 0.03%                             | 4546            | 670099bp        | 0.02%                            | 0               | 0bp             | 0.00%                  |
| -hAT-Pegasus:                      |       | 10              | 1173bp          | 0.00%                             | 0               | 0bp             | 0.00%                            | 0               | 0bp             | 0.00%                  |
| -hAT-Tag1:                         |       | 47              | 9790bp          | 0.00%                             | 12              | 2556bp          | 0.00%                            | 0               | 0bp             | 0.00%                  |
| -hAT-Tip100:                       |       | 1025            | 178235bp        | 0.01%                             | 456             | 70325bp         | 0.00%                            | 0               | 0bp             | 0.00%                  |
| -hAT-hAT19:                        |       | 2               | 387bp           | 0.00%                             | 0               | 0bp             | 0.00%                            | 0               | 0bp             | 0.00%                  |
| -hAT-hAT5:                         |       | 10              | 1933bp          | 0.00%                             | 0               | 0bp             | 0.00%                            | 0               | 0bp             | 0.00%                  |
| -hAT-hATm:                         |       | 2               | 476bp           | 0.00%                             | 0               | 0bp             | 0.00%                            | 0               | 0bp             | 0.00%                  |
| <b>DNA?:</b>                       |       | 6               | 832bp           | 0.00%                             | 7               | 700bp           | 0.00%                            | 0               | 0bp             | 0.00%                  |
| -hAT:                              |       | 6               | 832bp           | 0.00%                             | 0               | 0bp             | 0.00%                            | 0               | 0bp             | 0.00%                  |
| -hAT-Tip100:                       |       | 0               | 0bp             | 0.00%                             | 7               | 700bp           | 0.00%                            | 0               | 0bp             | 0.00%                  |
| <b>LINE:</b>                       |       | 2385096         | 77705196bp      | 2.42%                             | 77613           | 7434368bp       | 0.23%                            | 1214            | 1024575bp       | 0.03%                  |
| -CR1:                              |       | 361             | 134160bp        | 0.00%                             | 128             | 40599bp         | 0.00%                            | 0               | 0bp             | 0.00%                  |
| -Dong-R4:                          |       | 6               | 823bp           | 0.00%                             | 0               | 0bp             | 0.00%                            | 0               | 0bp             | 0.00%                  |
| -I:                                |       | 14              | 2769bp          | 0.00%                             | 0               | 0bp             | 0.00%                            | 0               | 0bp             | 0.00%                  |
| -I-Jockey:                         |       | 80              | 12016bp         | 0.00%                             | 0               | 0bp             | 0.00%                            | 0               | 0bp             | 0.00%                  |
| -L1:                               |       | 2379706         | 76629820bp      | 2.39%                             | 74885           | 6895264bp       | 0.21%                            | 1214            | 1024575bp       | 0.03%                  |
| -L1-Tx1:                           |       | 49              | 8210bp          | 0.00%                             | 0               | 0bp             | 0.00%                            | 0               | 0bp             | 0.00%                  |
| -L2:                               |       | 4412            | 814174bp        | 0.03%                             | 2421            | 462834bp        | 0.01%                            | 0               | 0bp             | 0.00%                  |
| -OTHER:                            |       | 40              | 44303bp         | 0.00%                             | 0               | 0bp             | 0.00%                            | 0               | 0bp             | 0.00%                  |
| -Penelope:                         |       | 116             | 13680bp         | 0.00%                             | 27              | 514bp           | 0.00%                            | 0               | 0bp             | 0.00%                  |
| -Proto1:                           |       | 2               | 401bp           | 0.00%                             | 0               | 0bp             | 0.00%                            | 0               | 0bp             | 0.00%                  |
| -R1:                               |       | 15              | 433bp           | 0.00%                             | 0               | 0bp             | 0.00%                            | 0               | 0bp             | 0.00%                  |
| -R2:                               |       | 33              | 7271bp          | 0.00%                             | 0               | 0bp             | 0.00%                            | 0               | 0bp             | 0.00%                  |
| -R2-NeSL:                          |       | 16              | 2133bp          | 0.00%                             | 0               | 0bp             | 0.00%                            | 0               | 0bp             | 0.00%                  |
| -RTE-BovB:                         |       | 16              | 4881bp          | 0.00%                             | 44              | 15589bp         | 0.00%                            | 0               | 0bp             | 0.00%                  |
| -RTE-X:                            |       | 214             | 43075bp         | 0.00%                             | 108             | 19630bp         | 0.00%                            | 0               | 0bp             | 0.00%                  |
| -Rex-Babar:                        |       | 16              | 504bp           | 0.00%                             | 0               | 0bp             | 0.00%                            | 0               | 0bp             | 0.00%                  |
| <b>LTR:</b>                        |       | 27965           | 7748892bp       | 0.24%                             | 57872           | 5715985bp       | 0.18%                            | 54              | 6791bp          | 0.00%                  |
| -Caulimovirus:                     |       | 4               | 466bp           | 0.00%                             | 0               | 0bp             | 0.00%                            | 0               | 0bp             | 0.00%                  |
| -Copia:                            |       | 539             | 83436bp         | 0.00%                             | 175             | 34784bp         | 0.00%                            | 0               | 0bp             | 0.00%                  |
| -DIRS:                             |       | 23              | 3721bp          | 0.00%                             | 0               | 0bp             | 0.00%                            | 0               | 0bp             | 0.00%                  |
| -ERV:                              |       | 40              | 16576bp         | 0.00%                             | 18              | 1548bp          | 0.00%                            | 0               | 0bp             | 0.00%                  |
| -ERV1:                             |       | 10834           | 3244357bp       | 0.10%                             | 27501           | 2476441bp       | 0.08%                            | 0               | 0bp             | 0.00%                  |
| -ERVK:                             |       | 1641            | 789578bp        | 0.02%                             | 7918            | 640141bp        | 0.02%                            | 0               | 0bp             | 0.00%                  |
| -ERVL:                             |       | 5216            | 1386875bp       | 0.04%                             | 8382            | 960204bp        | 0.03%                            | 0               | 0bp             | 0.00%                  |
| -ERVL-MaLR:                        |       | 8360            | 1950768bp       | 0.06%                             | 13357           | 1487485bp       | 0.05%                            | 54              | 6791bp          | 0.00%                  |
| -Gypsy:                            |       | 967             | 208751bp        | 0.01%                             | 363             | 90801bp         | 0.00%                            | 0               | 0bp             | 0.00%                  |
| -Ngaro:                            |       | 37              | 7094bp          | 0.00%                             | 12              | 2310bp          | 0.00%                            | 0               | 0bp             | 0.00%                  |
| -OTHER:                            |       | 248             | 61774bp         | 0.00%                             | 117             | 28456bp         | 0.00%                            | 0               | 0bp             | 0.00%                  |
| -Pao:                              |       | 56              | 6016bp          | 0.00%                             | 29              | 1807bp          | 0.00%                            | 0               | 0bp             | 0.00%                  |
| <b>RC:</b>                         |       | 364             | 69262bp         | 0.00%                             | 63              | 4886bp          | 0.00%                            | 0               | 0bp             | 0.00%                  |
| -Helitron:                         |       | 362             | 68888bp         | 0.00%                             | 63              | 4886bp          | 0.00%                            | 0               | 0bp             | 0.00%                  |
| -Helitron-2:                       |       | 2               | 374bp           | 0.00%                             | 0               | 0bp             | 0.00%                            | 0               | 0bp             | 0.00%                  |
| <b>RC?:</b>                        |       | 19              | 7146bp          | 0.00%                             | 13              | 1405bp          | 0.00%                            | 0               | 0bp             | 0.00%                  |
| -Helitron:                         |       | 19              | 7146bp          | 0.00%                             | 13              | 1405bp          | 0.00%                            | 0               | 0bp             | 0.00%                  |
| <b>RNA:</b>                        |       | 2               | 532bp           | 0.00%                             | 20              | 1236bp          | 0.00%                            | 0               | 0bp             | 0.00%                  |
| -OTHER:                            |       | 2               | 532bp           | 0.00%                             | 20              | 1236bp          | 0.00%                            | 0               | 0bp             | 0.00%                  |
| <b>Retroposon:</b>                 |       | 1945            | 257205bp        | 0.01%                             | 7116            | 266328bp        | 0.01%                            | 114             | 22023bp         | 0.00%                  |
| -SVA:                              |       | 1945            | 257205bp        | 0.01%                             | 7116            | 266328bp        | 0.01%                            | 114             | 22023bp         | 0.00%                  |
| <b>SINE:</b>                       |       | 96269           | 15556436bp      | 0.48%                             | 31279           | 3191422bp       | 0.10%                            | 590             | 85945bp         | 0.00%                  |
| -5S:                               |       | 11              | 2554bp          | 0.00%                             | 54              | 17505bp         | 0.00%                            | 0               | 0bp             | 0.00%                  |
| -7SL:                              |       | 0               | 0bp             | 0.00%                             | 41              | 8007bp          | 0.00%                            | 0               | 0bp             | 0.00%                  |
| -Alu:                              |       | 90345           | 14369393bp      | 0.45%                             | 27884           | 2572731bp       | 0.08%                            | 590             | 85945bp         | 0.00%                  |
| -B4:                               |       | 0               | 0bp             | 0.00%                             | 61              | 5348bp          | 0.00%                            | 0               | 0bp             | 0.00%                  |
| -ID:                               |       | 6               | 4328bp          | 0.00%                             | 0               | 0bp             | 0.00%                            | 0               | 0bp             | 0.00%                  |
| -L2:                               |       | 4               | 791bp           | 0.00%                             | 0               | 0bp             | 0.00%                            | 0               | 0bp             | 0.00%                  |
| -MIR:                              |       | 5849            | 1175266bp       | 0.04%                             | 3182            | 564540bp        | 0.02%                            | 0               | 0bp             | 0.00%                  |
| -U:                                |       | 26              | 13119bp         | 0.00%                             | 38              | 9164bp          | 0.00%                            | 0               | 0bp             | 0.00%                  |
| -tRNA:                             |       | 6               | 844bp           | 0.00%                             | 9               | 14398bp         | 0.00%                            | 0               | 0bp             | 0.00%                  |
| -tRNA-7SL:                         |       | 2               | 428bp           | 0.00%                             | 0               | 0bp             | 0.00%                            | 0               | 0bp             | 0.00%                  |
| -tRNA-Core-L2:                     |       | 4               | 443bp           | 0.00%                             | 0               | 0bp             | 0.00%                            | 0               | 0bp             | 0.00%                  |
| -tRNA-Core-RTE:                    |       | 2               | 469bp           | 0.00%                             | 0               | 0bp             | 0.00%                            | 0               | 0bp             | 0.00%                  |
| -tRNA-RTE:                         |       | 14              | 2458bp          | 0.00%                             | 10              | 1250bp          | 0.00%                            | 0               | 0bp             | 0.00%                  |
| <b>SINE?:</b>                      |       | 8               | 3526bp          | 0.00%                             | 0               | 0bp             | 0.00%                            | 0               | 0bp             | 0.00%                  |
| -OTHER:                            |       | 8               | 3526bp          | 0.00%                             | 0               | 0bp             | 0.00%                            | 0               | 0bp             | 0.00%                  |
| <b>Satellite:</b>                  |       | 390501          | 25815874bp      | 0.80%                             | 398914          | 15445369bp      | 0.48%                            | 76609           | 6253274bp       | 0.19%                  |
| -OTHER:                            |       | 98480           | 1533391bp       | 0.05%                             | 26951           | 686531bp        | 0.02%                            | 505             | 94679bp         | 0.00%                  |
| -Y-chromosome:                     |       | 58559           | 5560028bp       | 0.17%                             | 106630          | 4401990bp       | 0.14%                            | 44835           | 4272503bp       | 0.13%                  |
| -acromeric:                        |       | 331             | 82222bp         | 0.00%                             | 2520            | 108836bp        | 0.00%                            | 0               | 0bp             | 0.00%                  |
| -centromeric:                      |       | 232934          | 20314996bp      | 0.63%                             | 262296          | 11108024bp      | 0.35%                            | 31269           | 3399724bp       | 0.11%                  |
| -telomeric:                        |       | 197             | 39613bp         | 0.00%                             | 517             | 44235bp         | 0.00%                            | 0               | 0bp             | 0.00%                  |
| <b>Simple:</b>                     |       | 673702          | 4512722bp       | 0.14%                             | 49891           | 954263bp        | 0.03%                            | 1219            | 133991bp        | 0.00%                  |
| -repeat:                           |       | 673702          | 4512722bp       | 0.14%                             | 49891           | 954263bp        | 0.03%                            | 1219            | 133991bp        | 0.00%                  |
| <b>Unknown:</b>                    |       | 132734          | 15520152bp      | 0.48%                             | 201476          | 16626979bp      | 0.52%                            | 47              | 23608bp         | 0.00%                  |
| -OTHER:                            |       | 132734          | 15520152        |                                   |                 |                 |                                  |                 |                 |                        |

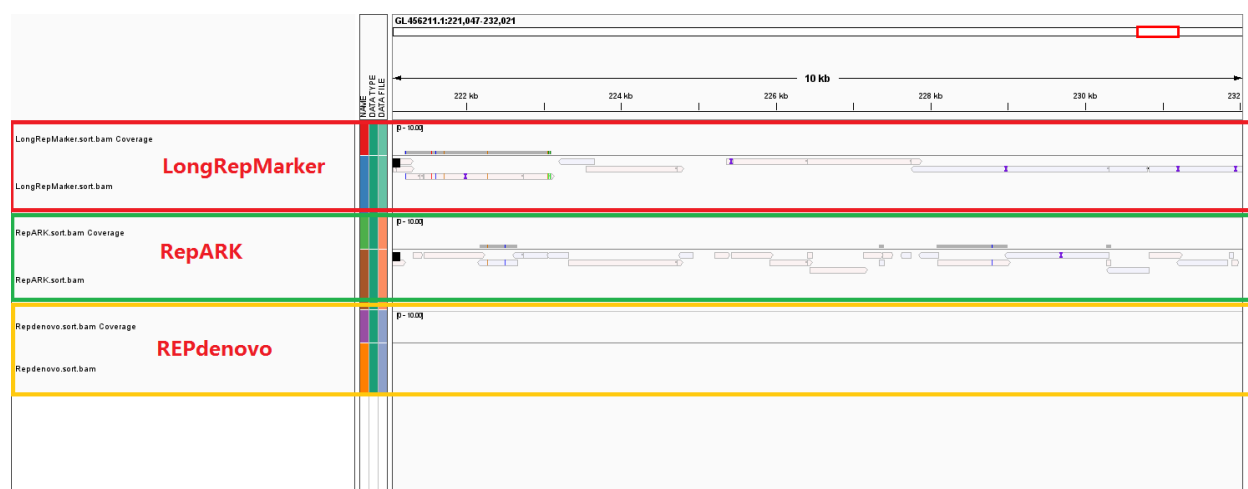

**Fig. S25.** An example showing the integrity and coverage of the repetitive sequences detected by LongRepMarker, RepARK and REPdenovo in the same region of the mouse genome. The pink arrow indicates the repetitive sequence covering the region (The pink arrow indicates the fragment that can be aligned multiple times which is defined in IGV[93]), and the direction of the arrow indicates the alignment direction. As can be seen from the figure, compared to RepARK, the repetitive sequence detected by LongRepMarker is more complete. In addition, we also noticed that REPdenovo did not detect any repetitive sequences in this region.

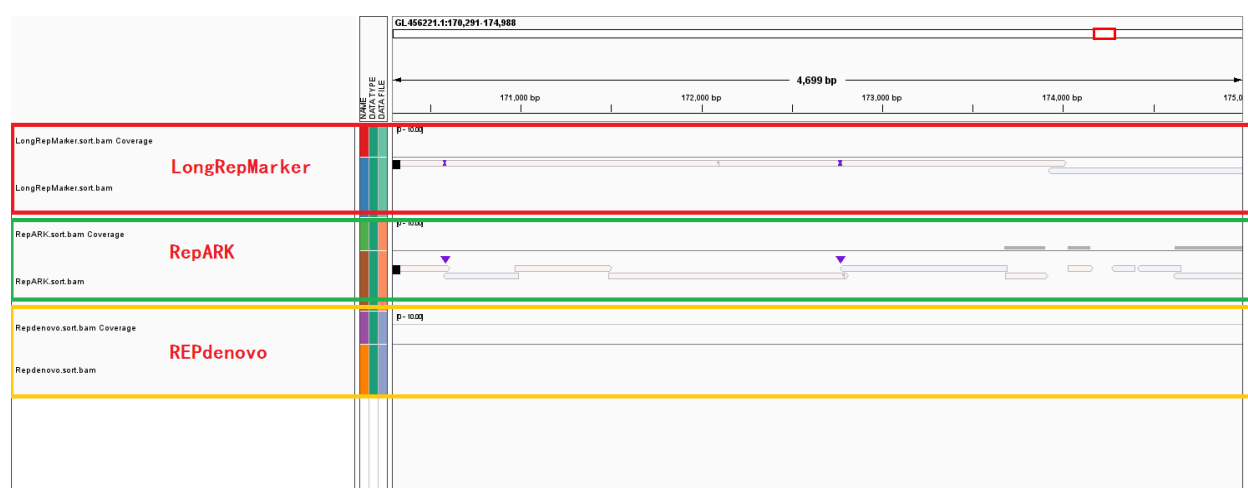

**Fig. S26.** Another example shows that the detection result of LongRepMarker is more complete than that of RepARK and REPdenovo. The pink arrow indicates the repetitive sequence covering the region (The pink arrow indicates the fragment that can be aligned multiple times which is defined in IGV), and the direction of the arrow indicates the alignment direction. It can be seen from the figure that the repetitive sequence detected by LongRepMarker is more complete than RepARK, and REPdenovo still has not detected any repeats in this region of the mouse genome.

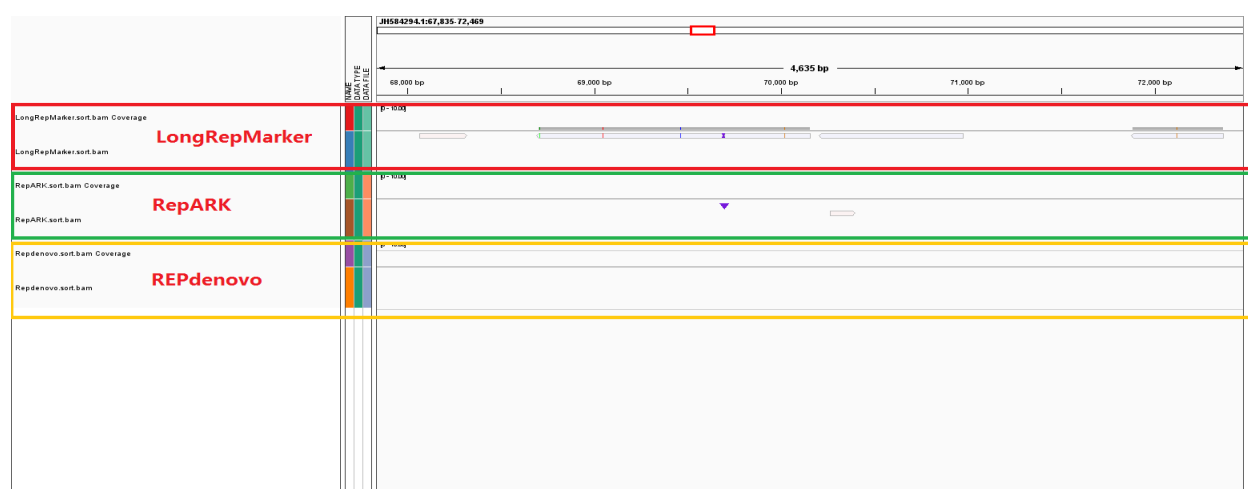

**Fig. S27.** An example showing that LongRepMarker can find repetitive sequences that the other two similar tools cannot recognize. The pink arrow indicates the repetitive sequence covering the region (The pink arrow indicates the fragment that can be aligned multiple times which is defined in IGV), and the direction of the arrow indicates the alignment direction. As can be seen from the figure, REPdenovo did not find any repetitive sequences in this region of the mouse genome, RepARK only found a short repetitive sequence, and LongRepMarker found large-scale repetitive sequences in this region (IGV identifies the fragments recognized by LongRepMarker as the fragments that can be aligned to multiple different locations on the mouse reference genome).

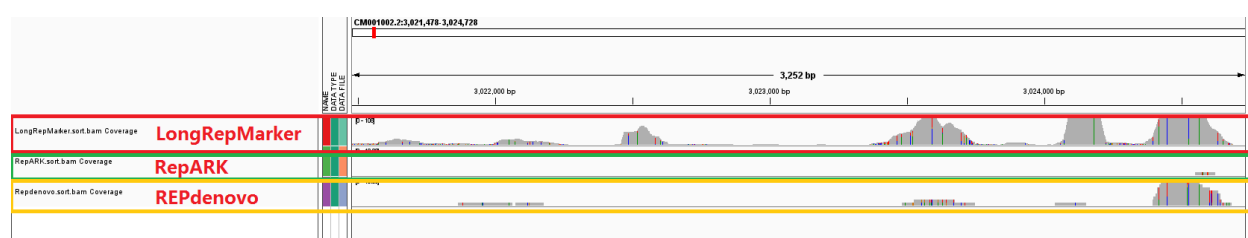

**Fig. S28.** A comparative example showing the coverage of repetitive sequences detected by LongRepMarker, RepARK and REPdenovo in the same region of the mouse genome. It can be seen from the figure that the high coverage regions detected by REPdenovo and RepARK can be well covered by the high coverage regions detected by LongRepMarker, and LongRepMarker can also find some high coverage regions that REPdenovo and RepARK cannot detect.



### 3.5.4 Detection results of *de novo* mode based on the NGS short reads + barcode linked reads / SMS long reads

In order to illustrate the effectiveness of the *de novo* mode based on the NGS short reads + barcode linked reads and the *de novo* mode based on the NGS short reads + SMS long reads of LongRepMarker, we tested these two kinds of *de novo* detection modes using three sets of real data respectively (Table S13). The NGS short paired-end reads, barcode linked reads and SMS long reads used in this experiment are downloaded from the NCBI website (<ftp://ftp-trace.ncbi.nlm.nih.gov/giab/ftp/data>). The detection results are shown in Fig.S29, Tables S40- S45. Since there is no tool has been proposed for repetitive sequence detection based on the mixed sequencing data, it will lose fairness if we compare the two modes of LongRepMarker with the detection methods based on single source sequencing data. Therefore, we did not compare LongRepMarker with other methods in this experiment.

The main purpose of this experiment is as follows: 1) LongRepMarker provides a detection mode based on mixed sequencing data, which can meet the needs of users to a greater extent; 2) This detection mode can make full use of the advantages of mixed sequencing data and make the detection results more superior than those obtained by using the single source sequencing data. For example, we can take HG003\_NA24149\_father dataset as an example to compare and analyze the test results of single source sequencing data and mixed sequencing data. The test results on single-source data cover the number and base length of DNA transposon elements in the RepBase library as 448 and 121106 bp, respectively, while the corresponding test results on mixed data are 529 and 157331 bp, respectively.

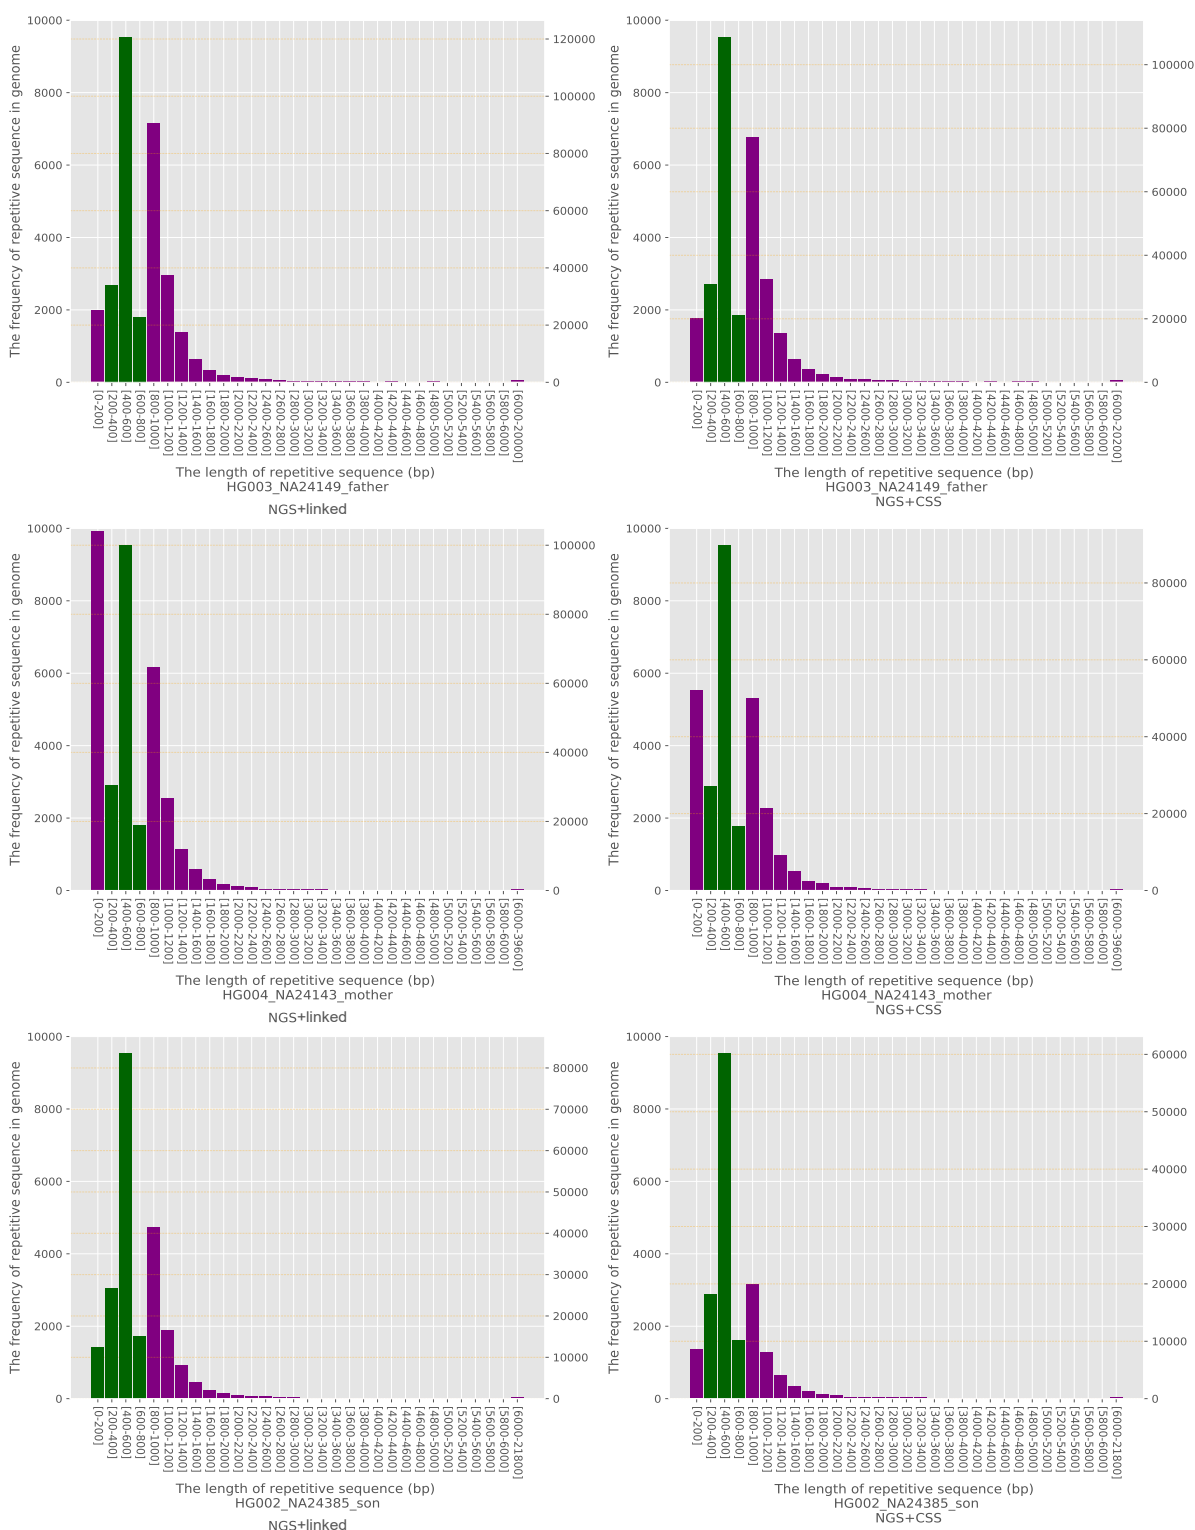

**Fig. S29.** Comparison of the repetition frequency and length distribution of the detected fragments generated from *de novo* mode based on the NGS short reads + barcode linked reads / SMS long reads. The X-axis represents the length distribution of the detected fragments and Y-axis represents the repetition frequency of the detected fragments in the genome, and the three images in each row respectively represent the frequency and length distribution of the repeated sequences detected by the three tools in a certain species. The coordinates of the Y-axis are divided into left and right displays, where the low frequency on the left is represented by purple, and the high frequency on the right is represented by green.

Table S40. The proportion and detailed classification of detection results in NGS+linked and NGS+CCS modes based on HG004\_NA24143\_father dataset covering the RepBase library of human.

| NGS+linked                         |                 |                 |                        | NGS+CCS                            |                 |                        |
|------------------------------------|-----------------|-----------------|------------------------|------------------------------------|-----------------|------------------------|
| sequence: 1512                     |                 |                 |                        | sequence: 1512                     |                 |                        |
| total length: 1647075bp            |                 |                 |                        | total length: 1647075bp            |                 |                        |
| bases masked: 1356355 bp ( 82.35%) |                 |                 |                        | bases masked: 1329292 bp ( 80.71%) |                 |                        |
| Repeat Types                       | Num of elements | Length occupied | Percentage of sequence | Num of elements                    | Length occupied | Percentage of sequence |
| <b>DNA transposon elements:</b>    | 529             | 157331bp        | 9.55%                  | 530                                | 150076bp        | 9.11%                  |
| -TcMar-Tigger:                     | 151             | 47828bp         | 2.90%                  | 146                                | 45008bp         | 2.73%                  |
| -hAT-Charlie:                      | 155             | 51530bp         | 3.13%                  | 153                                | 49307bp         | 2.99%                  |
| <b>LINEs:</b>                      | 755             | 342006bp        | 20.76%                 | 716                                | 317271bp        | 19.26%                 |
| -L3/CR1:                           | 44              | 8178bp          | 0.50%                  | 37                                 | 6059bp          | 0.37%                  |
| -LINE1:                            | 656             | 322493bp        | 19.58%                 | 632                                | 299940bp        | 18.21%                 |
| -LINE2:                            | 25              | 4521bp          | 0.27%                  | 20                                 | 4231bp          | 0.26%                  |
| <b>LTR elements:</b>               | 1202            | 665236bp        | 40.39%                 | 1146                               | 657465bp        | 39.92%                 |
| -ERV1:                             | 238             | 99978bp         | 6.07%                  | 246                                | 108103bp        | 6.56%                  |
| -ERV1-MaLRs:                       | 125             | 30774bp         | 1.87%                  | 104                                | 25865bp         | 1.57%                  |
| -ERV_classI:                       | 677             | 449556bp        | 27.29%                 | 655                                | 439668bp        | 26.69%                 |
| -ERV_classII:                      | 81              | 68280bp         | 4.15%                  | 72                                 | 70895bp         | 4.30%                  |
| <b>Low complexity:</b>             | 9               | 335bp           | 0.02%                  | 9                                  | 335bp           | 0.02%                  |
| <b>SINEs:</b>                      | 587             | 145272bp        | 8.82%                  | 592                                | 139383bp        | 8.46%                  |
| -ALUs:                             | 529             | 136837bp        | 8.31%                  | 534                                | 131652bp        | 7.99%                  |
| -MIRs:                             | 45              | 6844bp          | 0.42%                  | 46                                 | 6414bp          | 0.39%                  |
| <b>Satellites:</b>                 | 43              | 15892bp         | 0.96%                  | 45                                 | 14089bp         | 0.86%                  |
| <b>Simple repeats:</b>             | 214             | 31621bp         | 1.92%                  | 218                                | 31991bp         | 1.94%                  |
| <b>Small RNA:</b>                  | 24              | 2091bp          | 0.13%                  | 30                                 | 2558bp          | 0.16%                  |
| <b>Total interspersed repeats:</b> |                 | 1334166bp       | 81.00%                 |                                    | 1300226bp       | 78.94%                 |
| <b>Unclassified:</b>               | 135             | 24321bp         | 1.48%                  | 142                                | 36031bp         | 2.19%                  |

Table S41. The proportion and detailed classification of detection results in NGS+linked and NGS+CCS modes based on HG004\_NA24143\_mother dataset covering the RepBase library of human.

| NGS+linked                         |                 |                 |                        | NGS+CCS                            |                 |                        |
|------------------------------------|-----------------|-----------------|------------------------|------------------------------------|-----------------|------------------------|
| sequence: 1512                     |                 |                 |                        | sequence: 1512                     |                 |                        |
| total length: 1647075bp            |                 |                 |                        | total length: 1647075bp            |                 |                        |
| bases masked: 1329615 bp ( 80.73%) |                 |                 |                        | bases masked: 1293171 bp ( 78.51%) |                 |                        |
| Repeat Types                       | Num of elements | Length occupied | Percentage of sequence | Num of elements                    | Length occupied | Percentage of sequence |
| <b>DNA transposon elements:</b>    | 528             | 150342bp        | 9.13%                  | 517                                | 145580bp        | 8.84%                  |
| -TcMar-Tigger:                     | 138             | 44170bp         | 2.68%                  | 142                                | 45229bp         | 2.62%                  |
| -hAT-Charlie:                      | 153             | 49401bp         | 3.00%                  | 157                                | 42646bp         | 2.59%                  |
| <b>LINEs:</b>                      | 775             | 337998bp        | 20.52%                 | 701                                | 325868bp        | 19.78%                 |
| -L3/CR1:                           | 44              | 8516bp          | 0.52%                  | 36                                 | 7402bp          | 0.45%                  |
| -LINE1:                            | 671             | 317034bp        | 19.25%                 | 606                                | 306724bp        | 18.62%                 |
| -LINE2:                            | 28              | 4816bp          | 0.29%                  | 31                                 | 5798bp          | 0.35%                  |
| <b>LTR elements:</b>               | 1096            | 651711bp        | 39.57%                 | 1085                               | 631862bp        | 38.36%                 |
| -ERV1:                             | 235             | 100300bp        | 6.09%                  | 215                                | 100056bp        | 6.07%                  |
| -ERV1-MaLRs:                       | 105             | 27606bp         | 1.68%                  | 96                                 | 26084bp         | 1.58%                  |
| -ERV_classI:                       | 612             | 434666bp        | 26.39%                 | 623                                | 420143bp        | 25.51%                 |
| -ERV_classII:                      | 68              | 74021bp         | 4.49%                  | 77                                 | 71288bp         | 4.33%                  |
| <b>Low complexity:</b>             | 9               | 408bp           | 0.02%                  | 9                                  | 400bp           | 0.02%                  |
| <b>SINEs:</b>                      | 510             | 119810bp        | 7.27%                  | 550                                | 123213bp        | 7.48%                  |
| -ALUs:                             | 449             | 112463bp        | 6.83%                  | 490                                | 116172bp        | 7.05%                  |
| -MIRs:                             | 49              | 6213bp          | 0.38%                  | 48                                 | 5929bp          | 0.36%                  |
| <b>Satellites:</b>                 | 42              | 15290bp         | 0.93%                  | 41                                 | 11923bp         | 0.72%                  |
| <b>Simple repeats:</b>             | 223             | 31906bp         | 1.94%                  | 228                                | 32195bp         | 1.95%                  |
| <b>Small RNA:</b>                  | 30              | 5886bp          | 0.36%                  | 25                                 | 9492bp          | 0.58%                  |
| <b>Total interspersed repeats:</b> |                 | 1291796bp       | 78.43%                 |                                    | 1253440bp       | 76.10%                 |
| <b>Unclassified:</b>               | 134             | 31935bp         | 1.94%                  | 139                                | 26917bp         | 1.63%                  |

Table S42. The proportion and detailed classification of detection results in NGS+linked and NGS+CCS modes based on HG002\_NA24385\_son dataset covering the RepBase library of human.

| NGS+linked                         |                 |                 |                        | NGS+CCS                            |                 |                        |
|------------------------------------|-----------------|-----------------|------------------------|------------------------------------|-----------------|------------------------|
| sequence: 1512                     |                 |                 |                        | sequence: 1512                     |                 |                        |
| total length: 1647075bp            |                 |                 |                        | total length: 1647075bp            |                 |                        |
| bases masked: 1286981 bp ( 78.14%) |                 |                 |                        | bases masked: 1160200 bp ( 70.44%) |                 |                        |
| Repeat Types                       | Num of elements | Length occupied | Percentage of sequence | Num of elements                    | Length occupied | Percentage of sequence |
| <b>DNA transposon elements:</b>    | 534             | 139372bp        | 8.46%                  | 456                                | 110782bp        | 6.73%                  |
| -TcMar-Tigger:                     | 143             | 42626bp         | 2.59%                  | 112                                | 37508bp         | 2.28%                  |
| -hAT-Charlie:                      | 162             | 42019bp         | 2.55%                  | 140                                | 33184bp         | 2.01%                  |
| <b>LINEs:</b>                      | 750             | 338807bp        | 20.57%                 | 683                                | 305328bp        | 18.54%                 |
| -L3/CR1:                           | 30              | 6261bp          | 0.38%                  | 13                                 | 2297bp          | 0.14%                  |
| -LINE1:                            | 664             | 320914bp        | 19.48%                 | 621                                | 294719bp        | 17.89%                 |
| -LINE2:                            | 23              | 4945bp          | 0.30%                  | 26                                 | 4256bp          | 0.26%                  |
| <b>LTR elements:</b>               | 1120            | 627620bp        | 38.11%                 | 1062                               | 559412bp        | 33.96%                 |
| -ERV1:                             | 201             | 101688bp        | 6.17%                  | 191                                | 84792bp         | 5.15%                  |
| -ERV1-MaLRs:                       | 104             | 26163bp         | 1.59%                  | 89                                 | 23499bp         | 1.43%                  |
| -ERV_classI:                       | 672             | 420113bp        | 25.51%                 | 653                                | 384072bp        | 23.32%                 |
| -ERV_classII:                      | 70              | 65574bp         | 3.98%                  | 79                                 | 58565bp         | 3.56%                  |
| <b>Low complexity:</b>             | 12              | 465bp           | 0.03%                  | 17                                 | 729bp           | 0.04%                  |
| <b>SINEs:</b>                      | 530             | 107562bp        | 6.53%                  | 534                                | 117772bp        | 7.15%                  |
| -ALUs:                             | 462             | 99461bp         | 6.04%                  | 495                                | 113330bp        | 6.88%                  |
| -MIRs:                             | 56              | 6915bp          | 0.42%                  | 32                                 | 3606bp          | 0.22%                  |
| <b>Satellites:</b>                 | 41              | 14681bp         | 0.89%                  | 41                                 | 15668bp         | 0.95%                  |
| <b>Simple repeats:</b>             | 229             | 32352bp         | 1.96%                  | 249                                | 33113bp         | 2.01%                  |
| <b>Small RNA:</b>                  | 31              | 13146bp         | 0.80%                  | 18                                 | 1299bp          | 0.08%                  |
| <b>Total interspersed repeats:</b> |                 | 1245300bp       | 75.61%                 |                                    | 1122100bp       | 68.13%                 |
| <b>Unclassified:</b>               | 149             | 31939bp         | 1.94%                  | 128                                | 28806bp         | 1.75%                  |

Table S43. The proportion and detailed classification of detection results in NGS+linked and NGS+CCS modes based on HG004\_NA24143.father dataset covering the repetitive regions on the reference genome of human(hg38).

| NGS+linked                                                                        |                 |                 |                        | NGS+CCS                                                                           |                 |                        |
|-----------------------------------------------------------------------------------|-----------------|-----------------|------------------------|-----------------------------------------------------------------------------------|-----------------|------------------------|
| sequence: 455<br>total length: 3209286105bp<br>bases masked: 122984485 bp (3.83%) |                 |                 |                        | sequence: 455<br>total length: 3209286105bp<br>bases masked: 151962671 bp (4.74%) |                 |                        |
| Repeat Types                                                                      | Num of elements | Length occupied | Percentage of sequence | Num of elements                                                                   | Length occupied | Percentage of sequence |
| <b>DNA:</b>                                                                       | 13058           | 4401621bp       | 0.14%                  | 32067                                                                             | 4803457bp       | 0.15%                  |
| -Academ-1:                                                                        | 18              | 59581bp         | 0.00%                  | 55                                                                                | 157892bp        | 0.00%                  |
| -Academ-2:                                                                        | 1               | 455bp           | 0.00%                  | 2                                                                                 | 455bp           | 0.00%                  |
| -CMC-Chapaev:                                                                     | 3               | 1295bp          | 0.00%                  | 8                                                                                 | 939bp           | 0.00%                  |
| -CMC-EnSpm:                                                                       | 2430            | 339527bp        | 0.01%                  | 8047                                                                              | 436802bp        | 0.01%                  |
| -CMC-Transib:                                                                     | 8               | 1964bp          | 0.00%                  | 17                                                                                | 2035bp          | 0.00%                  |
| -Crypton:                                                                         | 3               | 1497bp          | 0.00%                  | 6                                                                                 | 1319bp          | 0.00%                  |
| -Crypton-H:                                                                       | 70              | 24174bp         | 0.00%                  | 218                                                                               | 19281bp         | 0.00%                  |
| -Crypton-S:                                                                       | 2               | 834bp           | 0.00%                  | 0                                                                                 | 0bp             | 0.00%                  |
| -Crypton-V:                                                                       | 2               | 807bp           | 0.00%                  | 6                                                                                 | 1225bp          | 0.00%                  |
| -Dada:                                                                            | 19              | 6559bp          | 0.00%                  | 60                                                                                | 6294bp          | 0.00%                  |
| -Ginger:                                                                          | 138             | 56000bp         | 0.00%                  | 1031                                                                              | 94154bp         | 0.00%                  |
| -IS3EU:                                                                           | 6               | 486bp           | 0.00%                  | 25                                                                                | 676bp           | 0.00%                  |
| -Kolobok:                                                                         | 5               | 1866bp          | 0.00%                  | 10                                                                                | 1866bp          | 0.00%                  |
| -Kolobok-Hydra:                                                                   | 6               | 4440bp          | 0.00%                  | 12                                                                                | 4440bp          | 0.00%                  |
| -Kolobok-T2:                                                                      | 19              | 5603bp          | 0.00%                  | 34                                                                                | 4817bp          | 0.00%                  |
| -MULE-MuDR:                                                                       | 184             | 44392bp         | 0.00%                  | 458                                                                               | 52349bp         | 0.00%                  |
| -MULE-NOF:                                                                        | 2               | 794bp           | 0.00%                  | 4                                                                                 | 501bp           | 0.00%                  |
| -Maverick:                                                                        | 46              | 11449bp         | 0.00%                  | 76                                                                                | 9121bp          | 0.00%                  |
| -Merlin:                                                                          | 5               | 2263bp          | 0.00%                  | 8                                                                                 | 1792bp          | 0.00%                  |
| -MuLE-MuDR:                                                                       | 13              | 5206bp          | 0.00%                  | 25                                                                                | 4439bp          | 0.00%                  |
| -MuLE-NOF:                                                                        | 1               | 851bp           | 0.00%                  | 3                                                                                 | 851bp           | 0.00%                  |
| -Novosib:                                                                         | 160             | 66797bp         | 0.00%                  | 572                                                                               | 84340bp         | 0.00%                  |
| -OTHER:                                                                           | 142             | 48412bp         | 0.00%                  | 295                                                                               | 42791bp         | 0.00%                  |
| -P:                                                                               | 13              | 4713bp          | 0.00%                  | 30                                                                                | 5594bp          | 0.00%                  |
| -PIF-Harbinger:                                                                   | 88              | 31544bp         | 0.00%                  | 213                                                                               | 26660bp         | 0.00%                  |
| -PiggyBac:                                                                        | 48              | 18644bp         | 0.00%                  | 75                                                                                | 15797bp         | 0.00%                  |
| -Sola-1:                                                                          | 20              | 7998bp          | 0.00%                  | 142                                                                               | 10959bp         | 0.00%                  |
| -Sola-2:                                                                          | 10              | 2012bp          | 0.00%                  | 36                                                                                | 3262bp          | 0.00%                  |
| -Sola-3:                                                                          | 80              | 44548bp         | 0.00%                  | 142                                                                               | 38834bp         | 0.00%                  |
| -TcMar:                                                                           | 1               | 408bp           | 0.00%                  | 2                                                                                 | 408bp           | 0.00%                  |
| -TcMar-Fot1:                                                                      | 59              | 6850bp          | 0.00%                  | 264                                                                               | 11884bp         | 0.00%                  |
| -TcMar-ISRm11:                                                                    | 3               | 1430bp          | 0.00%                  | 2                                                                                 | 430bp           | 0.00%                  |
| -TcMar-Mariner:                                                                   | 311             | 117060bp        | 0.00%                  | 708                                                                               | 135803bp        | 0.00%                  |
| -TcMar-Tc1:                                                                       | 128             | 48112bp         | 0.00%                  | 337                                                                               | 52745bp         | 0.00%                  |
| -TcMar-Tc2:                                                                       | 175             | 72875bp         | 0.00%                  | 284                                                                               | 59334bp         | 0.00%                  |
| -TcMar-Tigger:                                                                    | 3211            | 1274912bp       | 0.04%                  | 6891                                                                              | 1415967bp       | 0.04%                  |
| -Zisupton:                                                                        | 65              | 29270bp         | 0.00%                  | 328                                                                               | 27876bp         | 0.00%                  |
| -hAT:                                                                             | 49              | 14109bp         | 0.00%                  | 101                                                                               | 13179bp         | 0.00%                  |
| -hAT-Ac:                                                                          | 105             | 37847bp         | 0.00%                  | 204                                                                               | 37667bp         | 0.00%                  |
| -hAT-Blackjack:                                                                   | 210             | 71492bp         | 0.00%                  | 342                                                                               | 60015bp         | 0.00%                  |
| -hAT-Charlie:                                                                     | 4196            | 1577047bp       | 0.05%                  | 8969                                                                              | 1620371bp       | 0.05%                  |
| -hAT-Tag1:                                                                        | 48              | 19677bp         | 0.00%                  | 92                                                                                | 16228bp         | 0.00%                  |
| -hAT-Tip100:                                                                      | 941             | 341704bp        | 0.01%                  | 1921                                                                              | 340967bp        | 0.01%                  |
| -hAT-hAT1:                                                                        | 2               | 547bp           | 0.00%                  | 0                                                                                 | 0bp             | 0.00%                  |
| -hAT-hAT19:                                                                       | 2               | 950bp           | 0.00%                  | 4                                                                                 | 950bp           | 0.00%                  |
| -hAT-hAT5:                                                                        | 4               | 1852bp          | 0.00%                  | 0                                                                                 | 0bp             | 0.00%                  |
| -hAT-hATm:                                                                        | 1               | 476bp           | 0.00%                  | 2                                                                                 | 476bp           | 0.00%                  |
| -hAT-hobo:                                                                        | 5               | 1477bp          | 0.00%                  | 6                                                                                 | 999bp           | 0.00%                  |
| <b>DNA?:</b>                                                                      | 14              | 4480bp          | 0.00%                  | 39                                                                                | 5487bp          | 0.00%                  |
| -PiggyBac:                                                                        | 4               | 998bp           | 0.00%                  | 8                                                                                 | 998bp           | 0.00%                  |
| -hAT:                                                                             | 6               | 2155bp          | 0.00%                  | 10                                                                                | 1749bp          | 0.00%                  |
| -hAT-Tip100:                                                                      | 4               | 1327bp          | 0.00%                  | 21                                                                                | 2740bp          | 0.00%                  |
| <b>LINE:</b>                                                                      | 141460          | 65356369bp      | 2.04%                  | 468065                                                                            | 80098614bp      | 2.50%                  |
| -CR1:                                                                             | 357             | 148412bp        | 0.00%                  | 865                                                                               | 185669bp        | 0.01%                  |
| -CRE:                                                                             | 1               | 495bp           | 0.00%                  | 2                                                                                 | 495bp           | 0.00%                  |
| -Dong-R4:                                                                         | 7               | 2404bp          | 0.00%                  | 14                                                                                | 2404bp          | 0.00%                  |
| -I:                                                                               | 10              | 4075bp          | 0.00%                  | 10                                                                                | 2050bp          | 0.00%                  |
| -I-Jockey:                                                                        | 16              | 6183bp          | 0.00%                  | 31                                                                                | 5503bp          | 0.00%                  |
| -L1:                                                                              | 136324          | 63459384bp      | 1.98%                  | 457411                                                                            | 78215864bp      | 2.44%                  |
| -L1-Tx1:                                                                          | 28              | 12876bp         | 0.00%                  | 89                                                                                | 14787bp         | 0.00%                  |
| -L2:                                                                              | 4347            | 1571987bp       | 0.05%                  | 8847                                                                              | 1503413bp       | 0.05%                  |
| -OTHER:                                                                           | 20              | 11111bp         | 0.00%                  | 26                                                                                | 4934bp          | 0.00%                  |
| -Penelope:                                                                        | 44              | 15543bp         | 0.00%                  | 135                                                                               | 17842bp         | 0.00%                  |
| -Proto1:                                                                          | 1               | 401bp           | 0.00%                  | 2                                                                                 | 401bp           | 0.00%                  |
| -R1:                                                                              | 21              | 7819bp          | 0.00%                  | 74                                                                                | 17263bp         | 0.00%                  |
| -R2:                                                                              | 15              | 6859bp          | 0.00%                  | 12                                                                                | 2748bp          | 0.00%                  |
| -R2-Hero:                                                                         | 1               | 401bp           | 0.00%                  | 2                                                                                 | 401bp           | 0.00%                  |
| -R2-NeSL:                                                                         | 8               | 2752bp          | 0.00%                  | 29                                                                                | 4392bp          | 0.00%                  |
| -RTE-BovB:                                                                        | 56              | 29704bp         | 0.00%                  | 106                                                                               | 57834bp         | 0.00%                  |
| -RTE-RTE:                                                                         | 1               | 391bp           | 0.00%                  | 2                                                                                 | 391bp           | 0.00%                  |
| -RTE-X:                                                                           | 188             | 72701bp         | 0.00%                  | 370                                                                               | 73206bp         | 0.00%                  |
| -Rex-Babar:                                                                       | 9               | 1430bp          | 0.00%                  | 20                                                                                | 1113bp          | 0.00%                  |
| -Tad1:                                                                            | 6               | 3288bp          | 0.00%                  | 18                                                                                | 6538bp          | 0.00%                  |
| <b>LTR:</b>                                                                       | 19820           | 8562763bp       | 0.27%                  | 45777                                                                             | 10284240bp      | 0.32%                  |
| -Caulimovirus:                                                                    | 3               | 1087bp          | 0.00%                  | 6                                                                                 | 998bp           | 0.00%                  |
| -Copia:                                                                           | 243             | 80077bp         | 0.00%                  | 654                                                                               | 91005bp         | 0.00%                  |
| -DIRS:                                                                            | 5               | 1788bp          | 0.00%                  | 13                                                                                | 2859bp          | 0.00%                  |
| -ERV:                                                                             | 10              | 4528bp          | 0.00%                  | 18                                                                                | 4250bp          | 0.00%                  |
| -ERV1:                                                                            | 6685            | 3080698bp       | 0.10%                  | 16275                                                                             | 3803333bp       | 0.12%                  |
| -ERV4:                                                                            | 1               | 386bp           | 0.00%                  | 2                                                                                 | 386bp           | 0.00%                  |
| -ERVK:                                                                            | 599             | 417919bp        | 0.01%                  | 1733                                                                              | 744385bp        | 0.02%                  |
| -ERVL:                                                                            | 4117            | 1772072bp       | 0.06%                  | 9471                                                                              | 2062304bp       | 0.06%                  |
| -ERVL-MaLR:                                                                       | 7343            | 2881961bp       | 0.09%                  | 15475                                                                             | 3164255bp       | 0.10%                  |
| -Gypsy:                                                                           | 526             | 215484bp        | 0.01%                  | 1406                                                                              | 300580bp        | 0.01%                  |
| -Ngaro:                                                                           | 44              | 16175bp         | 0.00%                  | 168                                                                               | 23666bp         | 0.00%                  |
| -OTHER:                                                                           | 186             | 80434bp         | 0.00%                  | 424                                                                               | 95892bp         | 0.00%                  |
| -Pao:                                                                             | 58              | 15618bp         | 0.00%                  | 132                                                                               | 15181bp         | 0.00%                  |
| <b>RC:</b>                                                                        | 185             | 101904bp        | 0.00%                  | 418                                                                               | 95050bp         | 0.00%                  |
| -Helitron:                                                                        | 184             | 101474bp        | 0.00%                  | 416                                                                               | 94696bp         | 0.00%                  |
| -Helitron-2:                                                                      | 1               | 430bp           | 0.00%                  | 2                                                                                 | 354bp           | 0.00%                  |
| <b>RC?:</b>                                                                       | 14              | 7800bp          | 0.00%                  | 23                                                                                | 7874bp          | 0.00%                  |
| -Helitron:                                                                        | 14              | 7800bp          | 0.00%                  | 23                                                                                | 7874bp          | 0.00%                  |
| <b>RNA:</b>                                                                       | 6               | 2250bp          | 0.00%                  | 9                                                                                 | 1742bp          | 0.00%                  |
| -OTHER:                                                                           | 6               | 2250bp          | 0.00%                  | 9                                                                                 | 1742bp          | 0.00%                  |
| <b>Retroposon:</b>                                                                | 204             | 81803bp         | 0.00%                  | 1280                                                                              | 192958bp        | 0.01%                  |
| -SVA:                                                                             | 204             | 81803bp         | 0.00%                  | 1280                                                                              | 192958bp        | 0.01%                  |
| <b>SINE:</b>                                                                      | 36757           | 16369642bp      | 0.51%                  | 140349                                                                            | 21762573bp      | 0.68%                  |
| -5S:                                                                              | 7               | 2953bp          | 0.00%                  | 14                                                                                | 2712bp          | 0.00%                  |
| -5S-Deu-L2:                                                                       | 6               | 3103bp          | 0.00%                  | 10                                                                                | 2460bp          | 0.00%                  |
| -5S-Sauria-RTE:                                                                   | 2               | 1078bp          | 0.00%                  | 4                                                                                 | 785bp           | 0.00%                  |
| -7SL:                                                                             | 0               | 0bp             | 0.00%                  | 2                                                                                 | 415bp           | 0.00%                  |
| -Alu:                                                                             | 30496           | 14159380bp      | 0.44%                  | 127439                                                                            | 19579671bp      | 0.61%                  |
| -ID:                                                                              | 2               | 846bp           | 0.00%                  | 0                                                                                 | 0bp             | 0.00%                  |
| -L2:                                                                              | 12              | 3249bp          | 0.00%                  | 45                                                                                | 3877bp          | 0.00%                  |
| -MIR:                                                                             | 6192            | 2176568bp       | 0.07%                  | 12768                                                                             | 2162197bp       | 0.07%                  |
| -U:                                                                               | 9               | 12021bp         | 0.00%                  | 25                                                                                | 20051bp         | 0.00%                  |
| -tRNA:                                                                            | 12              | 4791bp          | 0.00%                  | 20                                                                                | 7250bp          | 0.00%                  |
| -tRNA-7SL:                                                                        | 2               | 840bp           | 0.00%                  | 4                                                                                 | 840bp           | 0.00%                  |
| -tRNA-Core-L2:                                                                    | 2               | 443bp           | 0.00%                  | 4                                                                                 | 443bp           | 0.00%                  |
| -tRNA-Core-RTE:                                                                   | 2               | 780bp           | 0.00%                  | 0                                                                                 | 0bp             | 0.00%                  |
| -tRNA-Deu:                                                                        | 1               | 428bp           | 0.00%                  | 0                                                                                 | 0bp             | 0.00%                  |
| -tRNA-Deu-L2:                                                                     | 2               | 463bp           | 0.00%                  | 0                                                                                 | 0bp             | 0.00%                  |
| -tRNA-RTE:                                                                        | 10              | 3487bp          | 0.00%                  | 14                                                                                | 2724bp          | 0.00%                  |
| <b>SINE?:</b>                                                                     | 4               | 3758bp          | 0.00%                  | 0                                                                                 | 0bp             | 0.00%                  |
| -OTHER:                                                                           | 4               | 3758bp          | 0.00%                  | 0                                                                                 | 0bp             | 0.00%                  |
| <b>Satellite:</b>                                                                 | 8510            | 3270195bp       | 0.10%                  | 65619                                                                             | 9826360bp       | 0.31%                  |
| -OTHER:                                                                           | 5342            | 1199393bp       | 0.04%                  | 23322                                                                             | 1544398bp       | 0.05%                  |
| -Y-chromosome:                                                                    | 959             | 1056067bp       | 0.03%                  | 13276                                                                             | 4036474bp       | 0.13%                  |
| -acromeric:                                                                       | 34              | 44645bp         | 0.00%                  | 126                                                                               | 73679bp         | 0.00%                  |
| -centromeric:                                                                     | 2066            | 948068bp        | 0.03%                  | 28638                                                                             | 4457340bp       | 0.14%                  |
| -telomeric:                                                                       | 109             | 50047bp         | 0.00%                  | 257                                                                               | 59463bp         | 0.00%                  |
| <b>Simple:</b>                                                                    | 26349           | 3667427bp       | 0.11%                  | 375841                                                                            | 4398437bp       | 0.14%                  |
| -repeat:                                                                          | 26349           | 3667427bp       | 0.11%                  | 375841                                                                            | 4398437bp       | 0.14%                  |
| <b>Unknown:</b>                                                                   | 59683           | 22588323bp      | 0.70%                  | 167981                                                                            | 23913807bp      | 0.75%                  |
| -OTHER:                                                                           | 59683           | 22588323bp      | 0.70%                  | 167981                                                                            | 23913807bp      | 0.75%                  |
| <b>rRNA:</b>                                                                      | 15              | 6123bp          | 0.00%                  | 27                                                                                | 6354bp          | 0.00%                  |
| -OTHER:                                                                           | 15              | 6123bp          | 0.00%                  | 27                                                                                | 6354bp          | 0.00%                  |
| <b>scRNA:</b>                                                                     | 16              | 5469bp          | 0.00%                  | 16                                                                                | 2561bp          | 0.00%                  |
| -OTHER:                                                                           | 16              | 5469bp          | 0.00%                  | 16                                                                                | 2561bp          | 0.00%                  |
| <b>snRNA:</b>                                                                     | 38              | 17729bp         | 0.00%                  | 126                                                                               | 21510bp         | 0.00%                  |
| -OTHER:                                                                           | 38              | 17729bp         | 0.00%                  | 126                                                                               | 21510bp         | 0.00%                  |
| <b>tRNA:</b>                                                                      | 37              | 23243bp         | 0.00%                  | 72                                                                                | 19646bp         | 0.00%                  |
| -OTHER:                                                                           | 37              | 23243bp         | 0.00%                  | 72                                                                                | 19646bp         | 0.00%                  |

Table S44. The proportion and detailed classification of detection results in NGS+linked and NGS+CCS modes based on HG004\_NA24143\_mother dataset covering the repetitive regions on the reference genome of human(hg38).

| NGS+linked                         |                 |                 |                        | NGS+CCS                            |                 |                        |  |
|------------------------------------|-----------------|-----------------|------------------------|------------------------------------|-----------------|------------------------|--|
| sequence: 455                      |                 |                 |                        | sequence: 455                      |                 |                        |  |
| total length: 3209286105bp         |                 |                 |                        | total length: 3209286105bp         |                 |                        |  |
| bases masked: 103986182 bp (3.24%) |                 |                 |                        | bases masked: 138766579 bp (4.32%) |                 |                        |  |
| Repeat Types                       | Num of elements | Length occupied | Percentage of sequence | Num of elements                    | Length occupied | Percentage of sequence |  |
| <b>DNA:</b>                        | 11430           | 3712078bp       | 0.12%                  | 28587                              | 4175426bp       | 0.13%                  |  |
| -Academ:                           | 1               | 472bp           | 0.00%                  | 2                                  | 472bp           | 0.00%                  |  |
| -Academ-1:                         | 14              | 58634bp         | 0.00%                  | 28                                 | 95924bp         | 0.00%                  |  |
| -CMC-Chapaev:                      | 3               | 897bp           | 0.00%                  | 2                                  | 406bp           | 0.00%                  |  |
| -CMC-EnSpm:                        | 2540            | 326869bp        | 0.01%                  | 8791                               | 455183bp        | 0.01%                  |  |
| -Crypton:                          | 4               | 1105bp          | 0.00%                  | 6                                  | 684bp           | 0.00%                  |  |
| -Crypton-A:                        | 8               | 3385bp          | 0.00%                  | 17                                 | 4210bp          | 0.00%                  |  |
| -Crypton-H:                        | 37              | 12813bp         | 0.00%                  | 333                                | 20073bp         | 0.00%                  |  |
| -Crypton-S:                        | 9               | 1616bp          | 0.00%                  | 15                                 | 1673bp          | 0.00%                  |  |
| -Crypton-V:                        | 2               | 1053bp          | 0.00%                  | 2                                  | 631bp           | 0.00%                  |  |
| -Dada:                             | 16              | 4395bp          | 0.00%                  | 35                                 | 6317bp          | 0.00%                  |  |
| -Ginger:                           | 167             | 57925bp         | 0.00%                  | 1235                               | 92194bp         | 0.00%                  |  |
| -IS3EU:                            | 7               | 990bp           | 0.00%                  | 25                                 | 997bp           | 0.00%                  |  |
| -Kolobok:                          | 4               | 990bp           | 0.00%                  | 59                                 | 2762bp          | 0.00%                  |  |
| -Kolobok-Hydra:                    | 3               | 1398bp          | 0.00%                  | 6                                  | 1398bp          | 0.00%                  |  |
| -Kolobok-T2:                       | 10              | 1430bp          | 0.00%                  | 33                                 | 1764bp          | 0.00%                  |  |
| -MULE-MuDR:                        | 173             | 41795bp         | 0.00%                  | 369                                | 45549bp         | 0.00%                  |  |
| -MULE-NOF:                         | 0               | 0bp             | 0.00%                  | 5                                  | 147bp           | 0.00%                  |  |
| -Maverick:                         | 66              | 13335bp         | 0.00%                  | 121                                | 10689bp         | 0.00%                  |  |
| -Merlin:                           | 6               | 2040bp          | 0.00%                  | 6                                  | 1017bp          | 0.00%                  |  |
| -MuLE-MuDR:                        | 16              | 8696bp          | 0.00%                  | 63                                 | 20136bp         | 0.00%                  |  |
| -Novosib:                          | 136             | 55993bp         | 0.00%                  | 492                                | 58875bp         | 0.00%                  |  |
| -OTHER:                            | 119             | 40096bp         | 0.00%                  | 301                                | 44633bp         | 0.00%                  |  |
| -P:                                | 15              | 3851bp          | 0.00%                  | 37                                 | 3088bp          | 0.00%                  |  |
| -PIF-Harbinger:                    | 59              | 20642bp         | 0.00%                  | 107                                | 19318bp         | 0.00%                  |  |
| -PIF-Spy:                          | 7               | 1986bp          | 0.00%                  | 13                                 | 1646bp          | 0.00%                  |  |
| -PiggyBac:                         | 47              | 22035bp         | 0.00%                  | 87                                 | 20492bp         | 0.00%                  |  |
| -PiggyBac-X:                       | 1               | 417bp           | 0.00%                  | 4                                  | 955bp           | 0.00%                  |  |
| -Sola-1:                           | 24              | 10943bp         | 0.00%                  | 56                                 | 10219bp         | 0.00%                  |  |
| -Sola-2:                           | 5               | 1033bp          | 0.00%                  | 10                                 | 1196bp          | 0.00%                  |  |
| -Sola-3:                           | 51              | 28191bp         | 0.00%                  | 98                                 | 24937bp         | 0.00%                  |  |
| -TcMar-Cweed:                      | 1               | 431bp           | 0.00%                  | 2                                  | 431bp           | 0.00%                  |  |
| -TcMar-Fot1:                       | 73              | 15130bp         | 0.00%                  | 222                                | 15984bp         | 0.00%                  |  |
| -TcMar-Mariner:                    | 238             | 97854bp         | 0.00%                  | 485                                | 94346bp         | 0.00%                  |  |
| -TcMar-Pogo:                       | 1               | 427bp           | 0.00%                  | 2                                  | 427bp           | 0.00%                  |  |
| -TcMar-Tc1:                        | 81              | 25803bp         | 0.00%                  | 253                                | 29708bp         | 0.00%                  |  |
| -TcMar-Tc2:                        | 113             | 37963bp         | 0.00%                  | 222                                | 37695bp         | 0.00%                  |  |
| -TcMar-Tigger:                     | 2669            | 1103809bp       | 0.03%                  | 5605                               | 1380636bp       | 0.04%                  |  |
| -Zisupton:                         | 39              | 21791bp         | 0.00%                  | 233                                | 32422bp         | 0.00%                  |  |
| -hAT:                              | 41              | 14985bp         | 0.00%                  | 90                                 | 9651bp          | 0.00%                  |  |
| -hAT-Ac:                           | 55              | 18716bp         | 0.00%                  | 134                                | 16037bp         | 0.00%                  |  |
| -hAT-Blackjack:                    | 196             | 62473bp         | 0.00%                  | 359                                | 58080bp         | 0.00%                  |  |
| -hAT-Charlie:                      | 3550            | 1320017bp       | 0.04%                  | 7061                               | 1305964bp       | 0.04%                  |  |
| -hAT-Pegasus:                      | 0               | 0bp             | 0.00%                  | 2                                  | 315bp           | 0.00%                  |  |
| -hAT-Tag1:                         | 41              | 15347bp         | 0.00%                  | 56                                 | 10512bp         | 0.00%                  |  |
| -hAT-Tip100:                       | 772             | 262038bp        | 0.01%                  | 1495                               | 256550bp        | 0.01%                  |  |
| -hAT-hAT5:                         | 4               | 1860bp          | 0.00%                  | 0                                  | 0bp             | 0.00%                  |  |
| -hAT-hATx:                         | 1               | 427bp           | 0.00%                  | 0                                  | 0bp             | 0.00%                  |  |
| -hAT-hobo:                         | 5               | 802bp           | 0.00%                  | 8                                  | 802bp           | 0.00%                  |  |
| <b>DNA?:</b>                       | 14              | 4294bp          | 0.00%                  | 21                                 | 3054bp          | 0.00%                  |  |
| -PiggyBac:                         | 8               | 1688bp          | 0.00%                  | 6                                  | 625bp           | 0.00%                  |  |
| -hAT:                              | 4               | 1722bp          | 0.00%                  | 13                                 | 2006bp          | 0.00%                  |  |
| -hAT-Tip100:                       | 2               | 884bp           | 0.00%                  | 2                                  | 423bp           | 0.00%                  |  |
| <b>LINE:</b>                       | 124678          | 56785004bp      | 1.77%                  | 632523                             | 74183290bp      | 2.31%                  |  |
| -CR1:                              | 321             | 125569bp        | 0.00%                  | 526                                | 112630bp        | 0.00%                  |  |
| -CRE-Ambal:                        | 5               | 3148bp          | 0.00%                  | 12                                 | 4410bp          | 0.00%                  |  |
| -Dong-R4:                          | 10              | 4486bp          | 0.00%                  | 18                                 | 3984bp          | 0.00%                  |  |
| -I:                                | 3               | 2031bp          | 0.00%                  | 8                                  | 2213bp          | 0.00%                  |  |
| -I-Jockey:                         | 15              | 5449bp          | 0.00%                  | 21                                 | 3510bp          | 0.00%                  |  |
| -Jockey:                           | 5               | 2002bp          | 0.00%                  | 10                                 | 2002bp          | 0.00%                  |  |
| -L1:                               | 120704          | 55335616bp      | 1.72%                  | 625070                             | 72767785bp      | 2.27%                  |  |
| -L1-Tx1:                           | 19              | 6525bp          | 0.00%                  | 23                                 | 4638bp          | 0.00%                  |  |
| -L2:                               | 3327            | 1195153bp       | 0.04%                  | 6313                               | 1157059bp       | 0.04%                  |  |
| -OTHER:                            | 15              | 5696bp          | 0.00%                  | 19                                 | 3362bp          | 0.00%                  |  |
| -Penelope:                         | 21              | 5689bp          | 0.00%                  | 42                                 | 5145bp          | 0.00%                  |  |
| -R1:                               | 1               | 417bp           | 0.00%                  | 27                                 | 10816bp         | 0.00%                  |  |
| -R1-LOA:                           | 3               | 1241bp          | 0.00%                  | 2                                  | 588bp           | 0.00%                  |  |
| -R2:                               | 7               | 3415bp          | 0.00%                  | 12                                 | 2801bp          | 0.00%                  |  |
| -R2-Hero:                          | 3               | 710bp           | 0.00%                  | 6                                  | 710bp           | 0.00%                  |  |
| -R2-NeSL:                          | 2               | 207bp           | 0.00%                  | 4                                  | 207bp           | 0.00%                  |  |
| -RTE-BovB:                         | 25              | 11496bp         | 0.00%                  | 41                                 | 8149bp          | 0.00%                  |  |
| -RTE-RTE:                          | 1               | 390bp           | 0.00%                  | 2                                  | 390bp           | 0.00%                  |  |
| -RTE-X:                            | 187             | 75097bp         | 0.00%                  | 358                                | 96124bp         | 0.00%                  |  |
| -Rex-Babar:                        | 1               | 389bp           | 0.00%                  | 2                                  | 389bp           | 0.00%                  |  |
| -Tad1:                             | 3               | 802bp           | 0.00%                  | 7                                  | 1030bp          | 0.00%                  |  |
| <b>LINE?:</b>                      | 1               | 446bp           | 0.00%                  | 0                                  | 0bp             | 0.00%                  |  |
| -Penelope:                         | 1               | 446bp           | 0.00%                  | 0                                  | 0bp             | 0.00%                  |  |
| <b>LTR:</b>                        | 16569           | 7084889bp       | 0.22%                  | 37288                              | 8698665bp       | 0.27%                  |  |
| -Caulimovirus:                     | 3               | 437bp           | 0.00%                  | 6                                  | 437bp           | 0.00%                  |  |
| -Copia:                            | 224             | 66495bp         | 0.00%                  | 552                                | 63460bp         | 0.00%                  |  |
| -DIRS:                             | 3               | 1263bp          | 0.00%                  | 10                                 | 2107bp          | 0.00%                  |  |
| -ERV:                              | 7               | 4989bp          | 0.00%                  | 17                                 | 5906bp          | 0.00%                  |  |
| -ERV-Lenti:                        | 1               | 560bp           | 0.00%                  | 0                                  | 0bp             | 0.00%                  |  |
| -ERV1:                             | 5574            | 2541733bp       | 0.08%                  | 13854                              | 3375313bp       | 0.11%                  |  |
| -ERV4:                             | 1               | 409bp           | 0.00%                  | 0                                  | 0bp             | 0.00%                  |  |
| -ERVK:                             | 574             | 405326bp        | 0.01%                  | 1338                               | 670674bp        | 0.02%                  |  |
| -ERVL:                             | 3554            | 1519841bp       | 0.05%                  | 7471                               | 1718916bp       | 0.05%                  |  |
| -ERVL-MaLR:                        | 5883            | 2278539bp       | 0.07%                  | 12364                              | 2546184bp       | 0.08%                  |  |
| -Gypsy:                            | 486             | 186334bp        | 0.01%                  | 1108                               | 249564bp        | 0.01%                  |  |
| -Ngaro:                            | 44              | 15630bp         | 0.00%                  | 186                                | 20442bp         | 0.00%                  |  |
| -OTHER:                            | 165             | 60005bp         | 0.00%                  | 285                                | 56800bp         | 0.00%                  |  |
| -Pao:                              | 50              | 10819bp         | 0.00%                  | 97                                 | 7900bp          | 0.00%                  |  |
| <b>RC:</b>                         | 159             | 69151bp         | 0.00%                  | 403                                | 88167bp         | 0.00%                  |  |
| -Helitron:                         | 159             | 69151bp         | 0.00%                  | 403                                | 88167bp         | 0.00%                  |  |
| <b>RC?:</b>                        | 3               | 1583bp          | 0.00%                  | 6                                  | 1371bp          | 0.00%                  |  |
| -Helitron:                         | 3               | 1583bp          | 0.00%                  | 6                                  | 1371bp          | 0.00%                  |  |
| <b>Retroposon:</b>                 | 141             | 57991bp         | 0.00%                  | 820                                | 121527bp        | 0.00%                  |  |
| -SVA:                              | 141             | 57991bp         | 0.00%                  | 820                                | 121527bp        | 0.00%                  |  |
| <b>SINE:</b>                       | 30054           | 13133447bp      | 0.41%                  | 106196                             | 17610049bp      | 0.55%                  |  |
| -S:                                | 5               | 1714bp          | 0.00%                  | 28                                 | 3188bp          | 0.00%                  |  |
| -S-Deu-L2:                         | 4               | 1954bp          | 0.00%                  | 12                                 | 2144bp          | 0.00%                  |  |
| -S-Sauria-RTE:                     | 1               | 424bp           | 0.00%                  | 0                                  | 0bp             | 0.00%                  |  |
| -7SL:                              | 3               | 5788bp          | 0.00%                  | 82                                 | 11270bp         | 0.00%                  |  |
| -Alu:                              | 24901           | 11331590bp      | 0.35%                  | 96239                              | 15788453bp      | 0.49%                  |  |
| -B4:                               | 1               | 457bp           | 0.00%                  | 2                                  | 457bp           | 0.00%                  |  |
| -ID:                               | 5               | 1801bp          | 0.00%                  | 12                                 | 2067bp          | 0.00%                  |  |
| -L2:                               | 7               | 2129bp          | 0.00%                  | 18                                 | 1447bp          | 0.00%                  |  |
| -MIR:                              | 5095            | 1775930bp       | 0.06%                  | 9733                               | 1804428bp       | 0.06%                  |  |
| -U:                                | 6               | 4206bp          | 0.00%                  | 19                                 | 9074bp          | 0.00%                  |  |
| -tRNA:                             | 10              | 4338bp          | 0.00%                  | 25                                 | 4853bp          | 0.00%                  |  |
| -tRNA-Core-RTE:                    | 1               | 401bp           | 0.00%                  | 2                                  | 401bp           | 0.00%                  |  |
| -tRNA-Deu:                         | 1               | 446bp           | 0.00%                  | 0                                  | 0bp             | 0.00%                  |  |
| -tRNA-RTE:                         | 13              | 6432bp          | 0.00%                  | 22                                 | 5829bp          | 0.00%                  |  |
| -tRNA-V:                           | 1               | 381bp           | 0.00%                  | 2                                  | 381bp           | 0.00%                  |  |
| <b>SINE?:</b>                      | 1               | 376bp           | 0.00%                  | 2                                  | 376bp           | 0.00%                  |  |
| -OTHER:                            | 1               | 376bp           | 0.00%                  | 2                                  | 376bp           | 0.00%                  |  |
| <b>Satellite:</b>                  | 17270           | 3026886bp       | 0.09%                  | 113853                             | 13902539bp      | 0.43%                  |  |
| -OTHER:                            | 13561           | 1061734bp       | 0.03%                  | 28998                              | 1364080bp       | 0.04%                  |  |
| -Y-chromosome:                     | 875             | 837966bp        | 0.03%                  | 21370                              | 4763785bp       | 0.15%                  |  |
| -acromeric:                        | 65              | 51957bp         | 0.00%                  | 135                                | 49213bp         | 0.00%                  |  |
| -centromeric:                      | 2686            | 1067644bp       | 0.03%                  | 63128                              | 8687223bp       | 0.27%                  |  |
| -macro:                            | 0               | 0bp             | 0.00%                  | 8                                  | 1148bp          | 0.00%                  |  |
| -telomeric:                        | 83              | 33340bp         | 0.00%                  | 214                                | 42649bp         | 0.00%                  |  |
| <b>Simple:</b>                     | 25653           | 3270523bp       | 0.10%                  | 379042                             | 3956075bp       | 0.12%                  |  |
| -repeat:                           | 25653           | 3270523bp       | 0.10%                  | 379042                             | 3956075bp       | 0.12%                  |  |
| <b>Unknown:</b>                    | 48558           | 17971491bp      | 0.56%                  | 133876                             | 18590129bp      | 0.58%                  |  |
| -OTHER:                            | 48558           | 17971491bp      | 0.56%                  | 133876                             | 18590129bp      | 0.58%                  |  |
| <b>rRNA:</b>                       | 15              | 48620bp         | 0.00%                  | 33                                 | 51027bp         | 0.00%                  |  |
| -OTHER:                            | 15              | 48620bp         | 0.00%                  | 33                                 | 51027bp         | 0.00%                  |  |
| <b>scRNA:</b>                      | 20              | 10894bp         | 0.00%                  | 46                                 | 14988bp         | 0.00%                  |  |
| -OTHER:                            | 20              | 10894bp         | 0.00%                  | 46                                 | 14988bp         | 0.00%                  |  |
| <b>snRNA:</b>                      | 26              | 12907bp         | 0.00%                  | 124                                | 20343bp         | 0.00%                  |  |
| -OTHER:                            | 26              | 12907bp         | 0.00%                  | 124                                | 20343bp         | 0.00%                  |  |
| <b>tRNA:</b>                       | 26              | 24732bp         | 0.00%                  | 54                                 | 25999bp         | 0.00%                  |  |
| -OTHER:                            | 26              | 24732bp         | 0.00%                  | 54                                 | 25999bp         | 0.00%                  |  |

Table S45. The proportion and detailed classification of detection results in NGS+linked and NGS+CCS modes based on HG002\_NA24385\_son dataset covering the repetitive regions on the reference genome of human(hg38).

| NGS+linked                         |                 |                 |                        | NGS+CCS                           |                 |                        |  |
|------------------------------------|-----------------|-----------------|------------------------|-----------------------------------|-----------------|------------------------|--|
| sequence: 455                      |                 |                 |                        | sequence: 455                     |                 |                        |  |
| total length: 3209286105bp         |                 |                 |                        | total length: 3209286105bp        |                 |                        |  |
| bases masked: 135221591 bp (4.21%) |                 |                 |                        | bases masked: 94132889 bp (2.93%) |                 |                        |  |
| Repeat Types                       | Num of elements | Length occupied | Percentage of sequence | Num of elements                   | Length occupied | Percentage of sequence |  |
| <b>DNA:</b>                        | 27230           | 3869265bp       | 0.12%                  | 20223                             | 2881447bp       | 0.09%                  |  |
| -Academ-1:                         | 30              | 111186bp        | 0.00%                  | 78                                | 286562bp        | 0.01%                  |  |
| -CMC-Chapaev:                      | 10              | 703bp           | 0.00%                  | 8                                 | 256bp           | 0.00%                  |  |
| -CMC-EnSpm:                        | 7858            | 404955bp        | 0.01%                  | 7713                              | 406961bp        | 0.01%                  |  |
| -CMC-Transib:                      | 27              | 2381bp          | 0.00%                  | 23                                | 1940bp          | 0.00%                  |  |
| -Crypton:                          | 2               | 441bp           | 0.00%                  | 2                                 | 441bp           | 0.00%                  |  |
| -Crypton-A:                        | 6               | 913bp           | 0.00%                  | 0                                 | 0bp             | 0.00%                  |  |
| -Crypton-C:                        | 2               | 410bp           | 0.00%                  | 0                                 | 0bp             | 0.00%                  |  |
| -Crypton-H:                        | 313             | 19107bp         | 0.00%                  | 311                               | 18713bp         | 0.00%                  |  |
| -Crypton-S:                        | 3               | 648bp           | 0.00%                  | 3                                 | 648bp           | 0.00%                  |  |
| -Crypton-V:                        | 8               | 990bp           | 0.00%                  | 6                                 | 534bp           | 0.00%                  |  |
| -Dada:                             | 8               | 969bp           | 0.00%                  | 12                                | 1483bp          | 0.00%                  |  |
| -Ginger:                           | 615             | 64011bp         | 0.00%                  | 560                               | 56691bp         | 0.00%                  |  |
| -IS3EU:                            | 25              | 676bp           | 0.00%                  | 25                                | 676bp           | 0.00%                  |  |
| -Kolobok-Hydra:                    | 6               | 1077bp          | 0.00%                  | 6                                 | 1077bp          | 0.00%                  |  |
| -Kolobok-T2:                       | 21              | 2772bp          | 0.00%                  | 13                                | 1246bp          | 0.00%                  |  |
| -MULE-F:                           | 0               | 0bp             | 0.00%                  | 4                                 | 494bp           | 0.00%                  |  |
| -MULE-MuDR:                        | 414             | 48306bp         | 0.00%                  | 377                               | 41204bp         | 0.00%                  |  |
| -MULE-NOF:                         | 5               | 147bp           | 0.00%                  | 5                                 | 147bp           | 0.00%                  |  |
| -Maverick:                         | 83              | 8894bp          | 0.00%                  | 71                                | 6381bp          | 0.00%                  |  |
| -Merlin:                           | 6               | 1378bp          | 0.00%                  | 15                                | 2153bp          | 0.00%                  |  |
| -MuLE-MuDR:                        | 14              | 2994bp          | 0.00%                  | 36                                | 5416bp          | 0.00%                  |  |
| -MuLE-NOF?:                        | 4               | 187bp           | 0.00%                  | 4                                 | 187bp           | 0.00%                  |  |
| -Novosib:                          | 810             | 80087bp         | 0.00%                  | 871                               | 74122bp         | 0.00%                  |  |
| -OTHER:                            | 321             | 40205bp         | 0.00%                  | 199                               | 20973bp         | 0.00%                  |  |
| -P:                                | 29              | 6695bp          | 0.00%                  | 29                                | 7157bp          | 0.00%                  |  |
| -PIF-Harbinger:                    | 160             | 24218bp         | 0.00%                  | 174                               | 18455bp         | 0.00%                  |  |
| -PIF-Spy:                          | 6               | 1345bp          | 0.00%                  | 2                                 | 693bp           | 0.00%                  |  |
| -PiggyBac:                         | 91              | 16627bp         | 0.00%                  | 41                                | 7990bp          | 0.00%                  |  |
| -PiggyBac-X:                       | 8               | 1504bp          | 0.00%                  | 8                                 | 1504bp          | 0.00%                  |  |
| -Sola-1:                           | 28              | 4385bp          | 0.00%                  | 27                                | 3722bp          | 0.00%                  |  |
| -Sola-2:                           | 31              | 2617bp          | 0.00%                  | 23                                | 925bp           | 0.00%                  |  |
| -Sola-3:                           | 96              | 27459bp         | 0.00%                  | 123                               | 26075bp         | 0.00%                  |  |
| -TcMar:                            | 10              | 1965bp          | 0.00%                  | 2                                 | 387bp           | 0.00%                  |  |
| -TcMar-Fot1:                       | 216             | 12765bp         | 0.00%                  | 210                               | 10990bp         | 0.00%                  |  |
| -TcMar-Mariner:                    | 489             | 174261bp        | 0.01%                  | 236                               | 62599bp         | 0.00%                  |  |
| -TcMar-Pogo:                       | 4               | 487bp           | 0.00%                  | 10                                | 2245bp          | 0.00%                  |  |
| -TcMar-Sagan:                      | 0               | 0bp             | 0.00%                  | 4                                 | 426bp           | 0.00%                  |  |
| -TcMar-Tc1:                        | 187             | 30395bp         | 0.00%                  | 165                               | 23992bp         | 0.00%                  |  |
| -TcMar-Tc2:                        | 167             | 38437bp         | 0.00%                  | 98                                | 26127bp         | 0.00%                  |  |
| -TcMar-Tigger:                     | 5670            | 1059000bp       | 0.03%                  | 3271                              | 699262bp        | 0.02%                  |  |
| -Zisupton:                         | 218             | 38702bp         | 0.00%                  | 180                               | 47816bp         | 0.00%                  |  |
| -hAT:                              | 69              | 9792bp          | 0.00%                  | 42                                | 3213bp          | 0.00%                  |  |
| -hAT-Ac:                           | 435             | 36821bp         | 0.00%                  | 361                               | 27142bp         | 0.00%                  |  |
| -hAT-Blackjack:                    | 449             | 67699bp         | 0.00%                  | 176                               | 31575bp         | 0.00%                  |  |
| -hAT-Charlie:                      | 6919            | 1284494bp       | 0.04%                  | 3812                              | 812111bp        | 0.03%                  |  |
| -hAT-Pegasus:                      | 4               | 784bp           | 0.00%                  | 2                                 | 393bp           | 0.00%                  |  |
| -hAT-Tag1:                         | 96              | 16085bp         | 0.00%                  | 27                                | 4267bp          | 0.00%                  |  |
| -hAT-Tip100:                       | 1235            | 229878bp        | 0.01%                  | 842                               | 146206bp        | 0.00%                  |  |
| -hAT-hAT19:                        | 2               | 481bp           | 0.00%                  | 0                                 | 0bp             | 0.00%                  |  |
| -hAT-hAT5:                         | 4               | 851bp           | 0.00%                  | 0                                 | 0bp             | 0.00%                  |  |
| -hAT-hATm:                         | 14              | 1692bp          | 0.00%                  | 14                                | 1359bp          | 0.00%                  |  |
| -hAT-hobo:                         | 2               | 436bp           | 0.00%                  | 2                                 | 433bp           | 0.00%                  |  |
| <b>DNA?:</b>                       | 40              | 9199bp          | 0.00%                  | 13                                | 4134bp          | 0.00%                  |  |
| -PiggyBac:                         | 4               | 878bp           | 0.00%                  | 0                                 | 0bp             | 0.00%                  |  |
| -hAT:                              | 19              | 6465bp          | 0.00%                  | 13                                | 4134bp          | 0.00%                  |  |
| -hAT-Tip100:                       | 17              | 1856bp          | 0.00%                  | 0                                 | 0bp             | 0.00%                  |  |
| <b>LINE:</b>                       | 924114          | 7179790bp       | 2.24%                  | 287583                            | 51970980bp      | 1.62%                  |  |
| -CR1:                              | 530             | 127976bp        | 0.00%                  | 329                               | 106367bp        | 0.00%                  |  |
| -Dong-R4:                          | 16              | 2894bp          | 0.00%                  | 8                                 | 1202bp          | 0.00%                  |  |
| -I:                                | 10              | 2143bp          | 0.00%                  | 16                                | 4872bp          | 0.00%                  |  |
| -I-Jockey:                         | 95              | 12685bp         | 0.00%                  | 87                                | 9785bp          | 0.00%                  |  |
| -L1:                               | 917469          | 70581215bp      | 2.20%                  | 283294                            | 51129816bp      | 1.59%                  |  |
| -L1-Tx1:                           | 25              | 5551bp          | 0.00%                  | 25                                | 5019bp          | 0.00%                  |  |
| -L2:                               | 5460            | 979090bp        | 0.03%                  | 3432                              | 654365bp        | 0.02%                  |  |
| -OTHER:                            | 54              | 5723bp          | 0.00%                  | 12                                | 2655bp          | 0.00%                  |  |
| -Penelope:                         | 68              | 7939bp          | 0.00%                  | 70                                | 6391bp          | 0.00%                  |  |
| -R1:                               | 36              | 6228bp          | 0.00%                  | 32                                | 5496bp          | 0.00%                  |  |
| -R2:                               | 14              | 2776bp          | 0.00%                  | 35                                | 10775bp         | 0.00%                  |  |
| -R2-NeSL:                          | 4               | 207bp           | 0.00%                  | 4                                 | 207bp           | 0.00%                  |  |
| -RTE-BovB:                         | 57              | 10871bp         | 0.00%                  | 44                                | 7702bp          | 0.00%                  |  |
| -RTE-RTE:                          | 4               | 780bp           | 0.00%                  | 4                                 | 780bp           | 0.00%                  |  |
| -RTE-X:                            | 253             | 65945bp         | 0.00%                  | 174                               | 42455bp         | 0.00%                  |  |
| -Rex-Babar:                        | 17              | 494bp           | 0.00%                  | 17                                | 494bp           | 0.00%                  |  |
| -Tad1:                             | 2               | 481bp           | 0.00%                  | 0                                 | 0bp             | 0.00%                  |  |
| <b>LTR:</b>                        | 34626           | 8043123bp       | 0.25%                  | 22423                             | 5570154bp       | 0.17%                  |  |
| -Caulimovirus:                     | 38              | 9889bp          | 0.00%                  | 16                                | 4203bp          | 0.00%                  |  |
| -Copia:                            | 532             | 74888bp         | 0.00%                  | 337                               | 51874bp         | 0.00%                  |  |
| -DIRS:                             | 40              | 13144bp         | 0.00%                  | 28                                | 10640bp         | 0.00%                  |  |
| -ERV:                              | 31              | 10494bp         | 0.00%                  | 6                                 | 1211bp          | 0.00%                  |  |
| -ERV-Foamy:                        | 6               | 609bp           | 0.00%                  | 6                                 | 609bp           | 0.00%                  |  |
| -ERV1:                             | 13056           | 3223269bp       | 0.10%                  | 8316                              | 2258265bp       | 0.07%                  |  |
| -ERVK:                             | 1421            | 673655bp        | 0.02%                  | 1054                              | 582062bp        | 0.02%                  |  |
| -ERVL:                             | 6449            | 1461089bp       | 0.05%                  | 3839                              | 889364bp        | 0.03%                  |  |
| -ERVL-MaLR:                        | 11591           | 2300367bp       | 0.07%                  | 7658                              | 1568594bp       | 0.05%                  |  |
| -Gypsy:                            | 1062            | 223175bp        | 0.01%                  | 885                               | 163522bp        | 0.01%                  |  |
| -Ngaro:                            | 126             | 19841bp         | 0.00%                  | 105                               | 12036bp         | 0.00%                  |  |
| -OTHER:                            | 204             | 45428bp         | 0.00%                  | 120                               | 29481bp         | 0.00%                  |  |
| -Pao:                              | 70              | 6582bp          | 0.00%                  | 53                                | 3350bp          | 0.00%                  |  |
| <b>RC:</b>                         | 289             | 60235bp         | 0.00%                  | 173                               | 40962bp         | 0.00%                  |  |
| -Helitron:                         | 284             | 59033bp         | 0.00%                  | 173                               | 40962bp         | 0.00%                  |  |
| -Helitron-2:                       | 5               | 1202bp          | 0.00%                  | 0                                 | 0bp             | 0.00%                  |  |
| <b>RC?:</b>                        | 27              | 7104bp          | 0.00%                  | 17                                | 5331bp          | 0.00%                  |  |
| -Helitron:                         | 27              | 7104bp          | 0.00%                  | 17                                | 5331bp          | 0.00%                  |  |
| <b>Retroposon:</b>                 | 1160            | 194251bp        | 0.01%                  | 1263                              | 235984bp        | 0.01%                  |  |
| -OTHER:                            | 2               | 471bp           | 0.00%                  | 0                                 | 0bp             | 0.00%                  |  |
| -SVA:                              | 1158            | 193780bp        | 0.01%                  | 1263                              | 235984bp        | 0.01%                  |  |
| <b>SINE:</b>                       | 99069           | 15412336bp      | 0.48%                  | 72475                             | 11746999bp      | 0.37%                  |  |
| -5S:                               | 3               | 714bp           | 0.00%                  | 0                                 | 0bp             | 0.00%                  |  |
| -5S-Deu-L2:                        | 51              | 2918bp          | 0.00%                  | 4                                 | 461bp           | 0.00%                  |  |
| -Alu:                              | 90342           | 13835482bp      | 0.43%                  | 68239                             | 10796740bp      | 0.34%                  |  |
| -B4:                               | 4               | 810bp           | 0.00%                  | 2                                 | 431bp           | 0.00%                  |  |
| -ID:                               | 6               | 1218bp          | 0.00%                  | 10                                | 1185bp          | 0.00%                  |  |
| -L2:                               | 8               | 1116bp          | 0.00%                  | 0                                 | 0bp             | 0.00%                  |  |
| -MIR:                              | 8617            | 1553217bp       | 0.05%                  | 4167                              | 926547bp        | 0.03%                  |  |
| -U:                                | 18              | 17429bp         | 0.00%                  | 37                                | 25511bp         | 0.00%                  |  |
| -tRNA:                             | 6               | 1287bp          | 0.00%                  | 4                                 | 860bp           | 0.00%                  |  |
| -tRNA-7SL:                         | 4               | 834bp           | 0.00%                  | 4                                 | 834bp           | 0.00%                  |  |
| -tRNA-Deu:                         | 4               | 884bp           | 0.00%                  | 2                                 | 465bp           | 0.00%                  |  |
| -tRNA-RTE:                         | 6               | 1288bp          | 0.00%                  | 6                                 | 1288bp          | 0.00%                  |  |
| <b>SINE?:</b>                      | 14              | 1587bp          | 0.00%                  | 0                                 | 0bp             | 0.00%                  |  |
| -OTHER:                            | 14              | 1587bp          | 0.00%                  | 0                                 | 0bp             | 0.00%                  |  |
| <b>Satellite:</b>                  | 163786          | 16058560bp      | 0.50%                  | 39325                             | 7649229bp       | 0.24%                  |  |
| -OTHER:                            | 45438           | 1329674bp       | 0.04%                  | 15689                             | 1132905bp       | 0.04%                  |  |
| -Y-chromosome:                     | 26788           | 5530350bp       | 0.17%                  | 7826                              | 3882069bp       | 0.12%                  |  |
| -acromeric:                        | 111             | 68159bp         | 0.00%                  | 127                               | 61652bp         | 0.00%                  |  |
| -centromeric:                      | 91234           | 10922743bp      | 0.34%                  | 15484                             | 2777357bp       | 0.09%                  |  |
| -telomeric:                        | 215             | 37712bp         | 0.00%                  | 199                               | 50810bp         | 0.00%                  |  |
| <b>Simple:</b>                     | 459844          | 4216142bp       | 0.13%                  | 352037                            | 4062131bp       | 0.13%                  |  |
| -repeat:                           | 459844          | 4216142bp       | 0.13%                  | 352037                            | 4062131bp       | 0.13%                  |  |
| <b>Unknown:</b>                    | 132726          | 18003473bp      | 0.56%                  | 89618                             | 12107533bp      | 0.38%                  |  |
| -OTHER:                            | 132726          | 18003473bp      | 0.56%                  | 89618                             | 12107533bp      | 0.38%                  |  |
| <b>rRNA:</b>                       | 39              | 109343bp        | 0.00%                  | 18                                | 3097bp          | 0.00%                  |  |
| -OTHER:                            | 39              | 109343bp        | 0.00%                  | 18                                | 3097bp          | 0.00%                  |  |
| <b>scRNA:</b>                      | 28              | 11837bp         | 0.00%                  | 21                                | 8012bp          | 0.00%                  |  |
| -OTHER:                            | 28              | 11837bp         | 0.00%                  | 21                                | 8012bp          | 0.00%                  |  |
| <b>snRNA:</b>                      | 83              | 21098bp         | 0.00%                  | 51                                | 11892bp         | 0.00%                  |  |
| -OTHER:                            | 83              | 21098bp         | 0.00%                  | 51                                | 11892bp         | 0.00%                  |  |
| <b>tRNA:</b>                       | 88              | 30840bp         | 0.00%                  | 58                                | 25330bp         | 0.00%                  |  |
| -OTHER:                            | 88              | 30840bp         | 0.00%                  | 58                                | 25330bp         | 0.00%                  |  |

### 3.5.5 *de novo* detection mode based on only the SMS long reads

In order to better comply with market demand and further expand the application scope of this system, we have developed a new detection mode based on only the SMS long reads under the LongRepMarker framework. Compared with the existing detection methods based on the SMS long reads, this mode has the advantages of longer fragments, lower memory consumption, higher speed and higher detection accuracy. The input of this mode is only SMS long reads and the output is the detection results which contain the final repeat library and some reports.

RepLong is a novel *de novo* repeat elements identification method based on PacBio long reads. RepLong can handle lower coverage data and serve as a complementary solution to the existing methods to promote the repeat identification performance on long read sequencing data. In order to verify the detection performance of the *de novo* detection mode based on only the SMS long reads, we carried out a performance comparison between LongRepMarker and RepLong on 4 sets of pacbio real datasets. The detection results are shown in Fig. S30, and Tables S46-S53. From the results displayed in Fig. S30, we can find that the max fragment of detected results generated from LongRepMarker based on the drosophila\_100k dataset is 31.400kb, while the corresponding value of RepLong is 14.800kb, and the proportion of detected fragments of LongRepMarker covering the RepBase library is 37.29%, as compared to 19.56% for RepLong. The data selected in the experiment comes from the RepLong website (Table S13), where the coverage of the first two datasets is low, and the coverage of the latter two datasets is relatively high. In order to compare with RepLong under the low and high coverage conditions, we also chose the same datasets for testing.

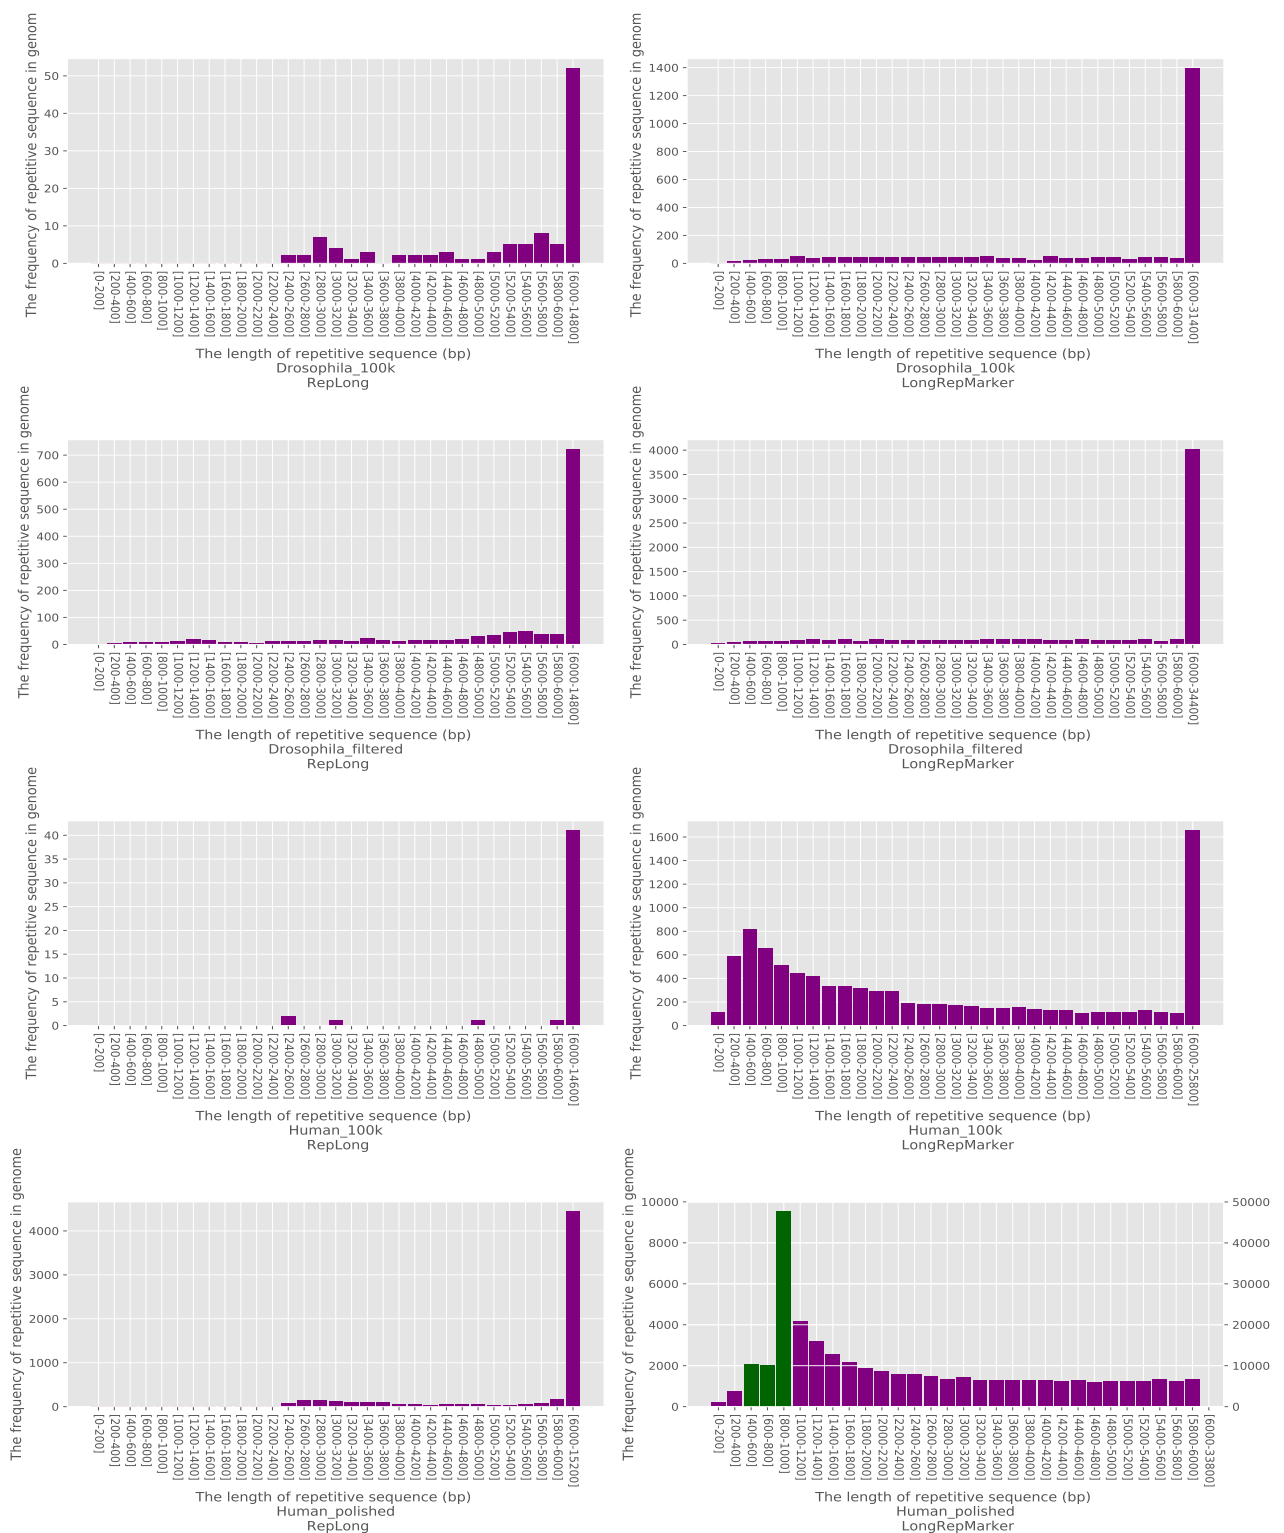

**Fig. S30.** Comparison of the repetition frequency and length distribution of the detected fragments generated from two tools. The X-axis represents the length distribution of the detected fragments and Y-axis represents the repetition frequency of the detected fragments in the genome, and the three images in each row respectively represent the frequency and length distribution of the repeated sequences detected by the three tools in a certain species. The coordinates of the Y-axis are divided into left and right displays, where the low frequency on the left is represented by purple, and the high frequency on the right is represented by green.

Table S46. Comparison of the proportion and detailed classification of detection results generated by two tools on drosophila\_100k dataset covering the corresponding RepBase library.

| RepLong                            |                 |                 |                        | LongRepMarker                      |                 |                        |
|------------------------------------|-----------------|-----------------|------------------------|------------------------------------|-----------------|------------------------|
| sequence: 2489                     |                 |                 |                        | sequence: 2489                     |                 |                        |
| total length: 7220516bp            |                 |                 |                        | total length: 7220516bp            |                 |                        |
| bases masked: 1411983 bp ( 19.56%) |                 |                 |                        | bases masked: 2692788 bp ( 37.29%) |                 |                        |
| Repeat Types                       | Num of elements | Length occupied | Percentage of sequence | Num of elements                    | Length occupied | Percentage of sequence |
| DNA transposon elements:           | 28              | 12922bp         | 0.18%                  | 94                                 | 34437bp         | 0.48%                  |
| -TcMar-Tigger:                     | 0               | 0bp             | 0.00%                  | 0                                  | 0bp             | 0.00%                  |
| -hAT-Charlie:                      | 0               | 0bp             | 0.00%                  | 0                                  | 0bp             | 0.00%                  |
| LINEs:                             | 374             | 432450bp        | 5.99%                  | 1427                               | 932778bp        | 12.92%                 |
| -L3/CR1:                           | 0               | 0bp             | 0.00%                  | 128                                | 75157bp         | 1.04%                  |
| -LINE1:                            | 0               | 0bp             | 0.00%                  | 1                                  | 87bp            | 0.00%                  |
| -LINE2:                            | 0               | 0bp             | 0.00%                  | 0                                  | 0bp             | 0.00%                  |
| LTR elements:                      | 671             | 836759bp        | 11.59%                 | 2043                               | 1596662bp       | 22.11%                 |
| -ERVL:                             | 0               | 0bp             | 0.00%                  | 0                                  | 0bp             | 0.00%                  |
| -ERVL-MaLRs:                       | 0               | 0bp             | 0.00%                  | 0                                  | 0bp             | 0.00%                  |
| -ERV_classI:                       | 0               | 0bp             | 0.00%                  | 0                                  | 0bp             | 0.00%                  |
| -ERV_classII:                      | 0               | 0bp             | 0.00%                  | 0                                  | 0bp             | 0.00%                  |
| Low complexity:                    | 379             | 20236bp         | 0.28%                  | 329                                | 17571bp         | 0.24%                  |
| SINEs:                             | 0               | 0bp             | 0.00%                  | 0                                  | 0bp             | 0.00%                  |
| -ALUs:                             | 0               | 0bp             | 0.00%                  | 0                                  | 0bp             | 0.00%                  |
| -MIRs:                             | 0               | 0bp             | 0.00%                  | 0                                  | 0bp             | 0.00%                  |
| Satellites:                        | 8               | 4440bp          | 0.06%                  | 18                                 | 5168bp          | 0.07%                  |
| Simple repeats:                    | 1380            | 86969bp         | 1.20%                  | 1218                               | 78538bp         | 1.09%                  |
| Small RNA:                         | 41              | 17926bp         | 0.25%                  | 31                                 | 8910bp          | 0.12%                  |
| Total interspersed repeats:        |                 | 1282432bp       | 17.76%                 |                                    | 2598998bp       | 35.99%                 |
| Unclassified:                      | 2               | 301bp           | 0.00%                  | 159                                | 35121bp         | 0.49%                  |

Table S47. Comparison of the proportion and detailed classification of detection results generated by two tools on dmel\_filtered dataset covering the corresponding RepBase library.

| RepLong                            |                 |                 |                        | LongRepMarker                      |                 |                        |
|------------------------------------|-----------------|-----------------|------------------------|------------------------------------|-----------------|------------------------|
| sequence: 2489                     |                 |                 |                        | sequence: 2489                     |                 |                        |
| total length: 7220516bp            |                 |                 |                        | total length: 7220516bp            |                 |                        |
| bases masked: 3369904 bp ( 46.67%) |                 |                 |                        | bases masked: 3172784 bp ( 43.94%) |                 |                        |
| Repeat Types                       | Num of elements | Length occupied | Percentage of sequence | Num of elements                    | Length occupied | Percentage of sequence |
| DNA transposon elements:           | 115             | 47278bp         | 0.65%                  | 273                                | 90505bp         | 1.25%                  |
| -TcMar-Tigger:                     | 0               | 0bp             | 0.00%                  | 0                                  | 0bp             | 0.00%                  |
| -hAT-Charlie:                      | 0               | 0bp             | 0.00%                  | 0                                  | 0bp             | 0.00%                  |
| LINEs:                             | 1118            | 975622bp        | 13.51%                 | 1532                               | 830630bp        | 11.50%                 |
| -L3/CR1:                           | 72              | 59325bp         | 0.82%                  | 327                                | 143147bp        | 1.98%                  |
| -LINE1:                            | 0               | 0bp             | 0.00%                  | 3                                  | 124bp           | 0.00%                  |
| -LINE2:                            | 0               | 0bp             | 0.00%                  | 0                                  | 0bp             | 0.00%                  |
| LTR elements:                      | 2567            | 2232023bp       | 30.91%                 | 2941                               | 2092428bp       | 28.98%                 |
| -ERVL:                             | 0               | 0bp             | 0.00%                  | 0                                  | 0bp             | 0.00%                  |
| -ERVL-MaLRs:                       | 0               | 0bp             | 0.00%                  | 0                                  | 0bp             | 0.00%                  |
| -ERV_classI:                       | 0               | 0bp             | 0.00%                  | 0                                  | 0bp             | 0.00%                  |
| -ERV_classII:                      | 0               | 0bp             | 0.00%                  | 0                                  | 0bp             | 0.00%                  |
| Low complexity:                    | 300             | 16307bp         | 0.23%                  | 305                                | 16291bp         | 0.23%                  |
| SINEs:                             | 0               | 0bp             | 0.00%                  | 1                                  | 74bp            | 0.00%                  |
| -ALUs:                             | 0               | 0bp             | 0.00%                  | 0                                  | 0bp             | 0.00%                  |
| -MIRs:                             | 0               | 0bp             | 0.00%                  | 0                                  | 0bp             | 0.00%                  |
| Satellites:                        | 13              | 5512bp          | 0.08%                  | 66                                 | 29926bp         | 0.41%                  |
| Simple repeats:                    | 1152            | 75079bp         | 1.04%                  | 1114                               | 72963bp         | 1.01%                  |
| Small RNA:                         | 22              | 8931bp          | 0.12%                  | 40                                 | 11182bp         | 0.15%                  |
| Total interspersed repeats:        |                 | 3273168bp       | 45.33%                 |                                    | 3097456bp       | 42.90%                 |
| Unclassified:                      | 67              | 18245bp         | 0.25%                  | 321                                | 83819bp         | 1.16%                  |

Table S48. Comparison of the proportion and detailed classification of detection results generated by two tools on human\_100k dataset covering the corresponding RepBase library.

| RepLong                           |                 |                 |                        | LongRepMarker                      |                 |                        |
|-----------------------------------|-----------------|-----------------|------------------------|------------------------------------|-----------------|------------------------|
| sequence: 1512                    |                 |                 |                        | sequence: 1512                     |                 |                        |
| total length: 1647075bp           |                 |                 |                        | total length: 1647075bp            |                 |                        |
| bases masked: 344169 bp ( 20.90%) |                 |                 |                        | bases masked: 1206368 bp ( 73.24%) |                 |                        |
| Repeat Types                      | Num of elements | Length occupied | Percentage of sequence | Num of elements                    | Length occupied | Percentage of sequence |
| DNA transposon elements:          | 0               | 0bp             | 0.00%                  | 63                                 | 29695bp         | 1.80%                  |
| -TcMar-Tigger:                    | 0               | 0bp             | 0.00%                  | 37                                 | 17618bp         | 1.07%                  |
| -hAT-Charlie:                     | 0               | 0bp             | 0.00%                  | 16                                 | 5773bp          | 0.35%                  |
| LINEs:                            | 459             | 237488bp        | 14.42%                 | 808                                | 385211bp        | 23.39%                 |
| -L3/CR1:                          | 0               | 0bp             | 0.00%                  | 4                                  | 1460bp          | 0.09%                  |
| -LINE1:                           | 459             | 237488bp        | 14.42%                 | 790                                | 378905bp        | 23.00%                 |
| -LINE2:                           | 0               | 0bp             | 0.00%                  | 4                                  | 1598bp          | 0.10%                  |
| LTR elements:                     | 6               | 1779bp          | 0.11%                  | 548                                | 437452bp        | 26.56%                 |
| -ERVL:                            | 6               | 1779bp          | 0.11%                  | 100                                | 66448bp         | 4.03%                  |
| -ERVL-MaLRs:                      | 0               | 0bp             | 0.00%                  | 28                                 | 8868bp          | 0.54%                  |
| -ERV_classI:                      | 0               | 0bp             | 0.00%                  | 355                                | 291096bp        | 17.67%                 |
| -ERV_classII:                     | 0               | 0bp             | 0.00%                  | 48                                 | 64626bp         | 3.92%                  |
| Low complexity:                   | 67              | 3106bp          | 0.19%                  | 18                                 | 803bp           | 0.05%                  |
| SINEs:                            | 166             | 48418bp         | 2.94%                  | 916                                | 274345bp        | 16.66%                 |
| -ALUs:                            | 166             | 48418bp         | 2.94%                  | 916                                | 274345bp        | 16.66%                 |
| -MIRs:                            | 0               | 0bp             | 0.00%                  | 0                                  | 0bp             | 0.00%                  |
| Satellites:                       | 7               | 1183bp          | 0.07%                  | 11                                 | 1999bp          | 0.12%                  |
| Simple repeats:                   | 383             | 39124bp         | 2.38%                  | 253                                | 33300bp         | 2.02%                  |
| Small RNA:                        | 0               | 0bp             | 0.00%                  | 4                                  | 268bp           | 0.02%                  |
| Total interspersed repeats:       |                 | 301494bp        | 18.30%                 |                                    | 1197844bp       | 72.73%                 |
| Unclassified:                     | 53              | 13809bp         | 0.84%                  | 212                                | 71141bp         | 4.32%                  |

Table S49. Comparison of the proportion and detailed classification of detection results generated by two tools on human\_polished dataset covering the corresponding RepBase library.

| RepLong                            |                 |                 |                        | LongRepMarker                      |                 |                        |
|------------------------------------|-----------------|-----------------|------------------------|------------------------------------|-----------------|------------------------|
| sequence: 1512                     |                 |                 |                        | sequence: 1512                     |                 |                        |
| total length: 1647075bp            |                 |                 |                        | total length: 1647075bp            |                 |                        |
| bases masked: 1252608 bp ( 76.05%) |                 |                 |                        | bases masked: 1583587 bp ( 96.15%) |                 |                        |
| Repeat Types                       | Num of elements | Length occupied | Percentage of sequence | Num of elements                    | Length occupied | Percentage of sequence |
| DNA transposon elements:           | 36              | 16849bp         | 1.02%                  | 106                                | 42145bp         | 2.56%                  |
| -TcMar-Tigger:                     | 16              | 8966bp          | 0.54%                  | 36                                 | 7857bp          | 0.48%                  |
| -hAT-Charlie:                      | 1               | 201bp           | 0.01%                  | 41                                 | 23220bp         | 1.41%                  |
| LINEs:                             | 1626            | 810377bp        | 49.20%                 | 1152                               | 647678bp        | 39.32%                 |
| -L3/CR1:                           | 2               | 511bp           | 0.03%                  | 19                                 | 6677bp          | 0.41%                  |
| -LINE1:                            | 1607            | 805742bp        | 48.92%                 | 1073                               | 625152bp        | 37.96%                 |
| -LINE2:                            | 7               | 1372bp          | 0.08%                  | 31                                 | 5587bp          | 0.34%                  |
| LTR elements:                      | 177             | 116258bp        | 7.06%                  | 289                                | 359583bp        | 21.83%                 |
| -ERVL:                             | 78              | 52446bp         | 3.18%                  | 68                                 | 46108bp         | 2.80%                  |
| -ERVL-MaLRs:                       | 0               | 0bp             | 0.00%                  | 52                                 | 13378bp         | 0.81%                  |
| -ERV_classI:                       | 95              | 62670bp         | 3.80%                  | 134                                | 23553bp         | 14.30%                 |
| -ERV_classII:                      | 4               | 1142bp          | 0.07%                  | 23                                 | 58157bp         | 3.53%                  |
| Low complexity:                    | 15              | 710bp           | 0.04%                  | 1                                  | 37bp            | 0.00%                  |
| SINEs:                             | 600             | 221950bp        | 13.48%                 | 1117                               | 449218bp        | 27.27%                 |
| -ALUs:                             | 600             | 221950bp        | 13.48%                 | 1069                               | 440362bp        | 26.74%                 |
| -MIRs:                             | 0               | 0bp             | 0.00%                  | 47                                 | 8709bp          | 0.53%                  |
| Satellites:                        | 7               | 1106bp          | 0.07%                  | 24                                 | 9705bp          | 0.59%                  |
| Simple repeats:                    | 240             | 33199bp         | 2.02%                  | 185                                | 30359bp         | 1.84%                  |
| Small RNA:                         | 0               | 0bp             | 0.00%                  | 6                                  | 1295bp          | 0.08%                  |
| Total interspersed repeats:        |                 | 1247284bp       | 75.73%                 |                                    | 1618750bp       | 98.28%                 |
| Unclassified:                      | 237             | 81850bp         | 4.97%                  | 278                                | 120126bp        | 7.29%                  |

**Table S50.** The proportion and detailed classification of detection results generated by two tools based on *drosophila\_100k* dataset covering the repetitive regions on the reference genome of *drosophila*.

| RepLong                                                                       |                 |                 |                        | LongRepMarker                                                                   |                 |                        |
|-------------------------------------------------------------------------------|-----------------|-----------------|------------------------|---------------------------------------------------------------------------------|-----------------|------------------------|
| sequence: 15<br>total length: 168736537bp<br>bases masked: 2969428 bp (1.76%) |                 |                 |                        | sequence: 15<br>total length: 168736537bp<br>bases masked: 20146354 bp (11.94%) |                 |                        |
| Repeat Types                                                                  | Num of elements | Length occupied | Percentage of sequence | Num of elements                                                                 | Length occupied | Percentage of sequence |
| <b>DNA:</b>                                                                   | 222             | 17645bp         | 0.01%                  | 4227                                                                            | 786564bp        | 0.47%                  |
| -Academ-1:                                                                    | 0               | 0bp             | 0.00%                  | 14                                                                              | 7962bp          | 0.00%                  |
| -CMC-Chapaev-3:                                                               | 0               | 0bp             | 0.00%                  | 13                                                                              | 22560bp         | 0.01%                  |
| -CMC-EnSpm:                                                                   | 0               | 0bp             | 0.00%                  | 56                                                                              | 71262bp         | 0.04%                  |
| -CMC-Transib:                                                                 | 0               | 0bp             | 0.00%                  | 25                                                                              | 22921bp         | 0.01%                  |
| -Crypton-V:                                                                   | 0               | 0bp             | 0.00%                  | 3                                                                               | 7309bp          | 0.00%                  |
| -Dada:                                                                        | 0               | 0bp             | 0.00%                  | 4                                                                               | 7326bp          | 0.00%                  |
| -Kolobok-T2:                                                                  | 0               | 0bp             | 0.00%                  | 6                                                                               | 9499bp          | 0.01%                  |
| -MULE-MuDR:                                                                   | 0               | 0bp             | 0.00%                  | 20                                                                              | 27111bp         | 0.02%                  |
| -MULE-NOF:                                                                    | 0               | 0bp             | 0.00%                  | 636                                                                             | 44060bp         | 0.03%                  |
| -Maverick:                                                                    | 0               | 0bp             | 0.00%                  | 12                                                                              | 7064bp          | 0.00%                  |
| -OTHER:                                                                       | 0               | 0bp             | 0.00%                  | 15                                                                              | 14919bp         | 0.01%                  |
| -P:                                                                           | 57              | 7947bp          | 0.00%                  | 2449                                                                            | 240060bp        | 0.14%                  |
| -PIF-Harbinger:                                                               | 0               | 0bp             | 0.00%                  | 15                                                                              | 19600bp         | 0.01%                  |
| -PiggyBac:                                                                    | 0               | 0bp             | 0.00%                  | 10                                                                              | 10674bp         | 0.01%                  |
| -TcMar-Fot1:                                                                  | 0               | 0bp             | 0.00%                  | 9                                                                               | 17511bp         | 0.01%                  |
| -TcMar-Pogo:                                                                  | 0               | 0bp             | 0.00%                  | 36                                                                              | 37399bp         | 0.02%                  |
| -TcMar-Tc1:                                                                   | 165             | 9698bp          | 0.01%                  | 695                                                                             | 105851bp        | 0.06%                  |
| -TcMar-Tc2:                                                                   | 0               | 0bp             | 0.00%                  | 3                                                                               | 2318bp          | 0.00%                  |
| -TcMar-m44:                                                                   | 0               | 0bp             | 0.00%                  | 5                                                                               | 5647bp          | 0.00%                  |
| -Zisupton:                                                                    | 0               | 0bp             | 0.00%                  | 5                                                                               | 9434bp          | 0.01%                  |
| -hAT:                                                                         | 0               | 0bp             | 0.00%                  | 16                                                                              | 11486bp         | 0.01%                  |
| -hAT-Ac:                                                                      | 0               | 0bp             | 0.00%                  | 36                                                                              | 31151bp         | 0.02%                  |
| -hAT-Charlie:                                                                 | 0               | 0bp             | 0.00%                  | 42                                                                              | 48068bp         | 0.03%                  |
| -hAT-hobo:                                                                    | 0               | 0bp             | 0.00%                  | 102                                                                             | 30987bp         | 0.02%                  |
| <b>LINE:</b>                                                                  | 5742            | 781210bp        | 0.46%                  | 77663                                                                           | 5312380bp       | 3.15%                  |
| -CR1:                                                                         | 0               | 0bp             | 0.00%                  | 237                                                                             | 192553bp        | 0.11%                  |
| -I:                                                                           | 284             | 47810bp         | 0.03%                  | 155                                                                             | 53095bp         | 0.03%                  |
| -I-Jockey:                                                                    | 135             | 36300bp         | 0.02%                  | 9953                                                                            | 1396401bp       | 0.83%                  |
| -Jockey:                                                                      | 2298            | 341290bp        | 0.20%                  | 14315                                                                           | 1421176bp       | 0.84%                  |
| -L1:                                                                          | 0               | 0bp             | 0.00%                  | 71                                                                              | 73781bp         | 0.04%                  |
| -L1-Tx1:                                                                      | 0               | 0bp             | 0.00%                  | 40                                                                              | 36227bp         | 0.02%                  |
| -L2:                                                                          | 0               | 0bp             | 0.00%                  | 24                                                                              | 15983bp         | 0.01%                  |
| -LOA:                                                                         | 0               | 0bp             | 0.00%                  | 75                                                                              | 35902bp         | 0.02%                  |
| -OTHER:                                                                       | 0               | 0bp             | 0.00%                  | 1872                                                                            | 308892bp        | 0.18%                  |
| -Penelope:                                                                    | 0               | 0bp             | 0.00%                  | 5                                                                               | 1606bp          | 0.00%                  |
| -R1:                                                                          | 2748            | 326794bp        | 0.19%                  | 40636                                                                           | 2525940bp       | 1.50%                  |
| -R1-LOA:                                                                      | 0               | 0bp             | 0.00%                  | 206                                                                             | 23130bp         | 0.01%                  |
| -R2:                                                                          | 277             | 41471bp         | 0.02%                  | 9351                                                                            | 819532bp        | 0.49%                  |
| -R2-Hero:                                                                     | 0               | 0bp             | 0.00%                  | 7                                                                               | 9664bp          | 0.01%                  |
| -R2-NeSL:                                                                     | 0               | 0bp             | 0.00%                  | 4                                                                               | 4126bp          | 0.00%                  |
| -RTE-X:                                                                       | 0               | 0bp             | 0.00%                  | 4                                                                               | 2344bp          | 0.00%                  |
| -Tad1:                                                                        | 0               | 0bp             | 0.00%                  | 708                                                                             | 6107bp          | 0.00%                  |
| <b>LTR:</b>                                                                   | 8897            | 1777857bp       | 1.05%                  | 77647                                                                           | 6192042bp       | 3.67%                  |
| -Caulimovirus:                                                                | 0               | 0bp             | 0.00%                  | 11                                                                              | 7741bp          | 0.00%                  |
| -Copia:                                                                       | 1112            | 139787bp        | 0.08%                  | 10402                                                                           | 799842bp        | 0.47%                  |
| -DIRS:                                                                        | 0               | 0bp             | 0.00%                  | 13                                                                              | 14109bp         | 0.01%                  |
| -ERV:                                                                         | 0               | 0bp             | 0.00%                  | 21                                                                              | 25055bp         | 0.01%                  |
| -ERV1:                                                                        | 0               | 0bp             | 0.00%                  | 32                                                                              | 56228bp         | 0.03%                  |
| -ERV4:                                                                        | 0               | 0bp             | 0.00%                  | 16                                                                              | 25400bp         | 0.02%                  |
| -ERVK:                                                                        | 0               | 0bp             | 0.00%                  | 3                                                                               | 2490bp          | 0.00%                  |
| -ERVL:                                                                        | 0               | 0bp             | 0.00%                  | 9                                                                               | 6159bp          | 0.00%                  |
| -ERVL-MaLR:                                                                   | 0               | 0bp             | 0.00%                  | 4                                                                               | 7504bp          | 0.00%                  |
| -Gypsy:                                                                       | 4405            | 1128076bp       | 0.67%                  | 18745                                                                           | 3294613bp       | 1.95%                  |
| -Ngaro:                                                                       | 0               | 0bp             | 0.00%                  | 9                                                                               | 10875bp         | 0.01%                  |
| -OTHER:                                                                       | 0               | 0bp             | 0.00%                  | 187                                                                             | 106548bp        | 0.06%                  |
| -Pao:                                                                         | 3380            | 509994bp        | 0.30%                  | 48195                                                                           | 2144191bp       | 1.27%                  |
| <b>Other:</b>                                                                 | 0               | 0bp             | 0.00%                  | 6878                                                                            | 444394bp        | 0.26%                  |
| -OTHER:                                                                       | 0               | 0bp             | 0.00%                  | 6878                                                                            | 444394bp        | 0.26%                  |
| <b>RC:</b>                                                                    | 0               | 0bp             | 0.00%                  | 1053                                                                            | 512929bp        | 0.30%                  |
| -Helitron:                                                                    | 0               | 0bp             | 0.00%                  | 1053                                                                            | 512929bp        | 0.30%                  |
| <b>SINE:</b>                                                                  | 0               | 0bp             | 0.00%                  | 24                                                                              | 37399bp         | 0.02%                  |
| -Alu:                                                                         | 0               | 0bp             | 0.00%                  | 19                                                                              | 14653bp         | 0.01%                  |
| -U:                                                                           | 0               | 0bp             | 0.00%                  | 5                                                                               | 22746bp         | 0.01%                  |
| <b>SINE?:</b>                                                                 | 0               | 0bp             | 0.00%                  | 10                                                                              | 11564bp         | 0.01%                  |
| -OTHER:                                                                       | 0               | 0bp             | 0.00%                  | 10                                                                              | 11564bp         | 0.01%                  |
| <b>Satellite:</b>                                                             | 1352            | 120893bp        | 0.07%                  | 82645                                                                           | 3889289bp       | 2.30%                  |
| -OTHER:                                                                       | 1352            | 120893bp        | 0.07%                  | 82645                                                                           | 3889289bp       | 2.30%                  |
| <b>Simple:</b>                                                                | 0               | 0bp             | 0.00%                  | 135931                                                                          | 483006bp        | 0.29%                  |
| -repeat:                                                                      | 0               | 0bp             | 0.00%                  | 135931                                                                          | 483006bp        | 0.29%                  |
| <b>Unknown:</b>                                                               | 148             | 60256bp         | 0.04%                  | 35009                                                                           | 4510469bp       | 2.67%                  |
| -OTHER:                                                                       | 148             | 60256bp         | 0.04%                  | 35009                                                                           | 4510469bp       | 2.67%                  |
| <b>rRNA:</b>                                                                  | 2166            | 277854bp        | 0.16%                  | 38614                                                                           | 1562614bp       | 0.93%                  |
| -OTHER:                                                                       | 2166            | 277854bp        | 0.16%                  | 38614                                                                           | 1562614bp       | 0.93%                  |
| <b>tRNA:</b>                                                                  | 0               | 0bp             | 0.00%                  | 65                                                                              | 79615bp         | 0.05%                  |
| -OTHER:                                                                       | 0               | 0bp             | 0.00%                  | 65                                                                              | 79615bp         | 0.05%                  |

**Table S51.** The proportion and detailed classification of detection results generated by two tools based on *human\_100k* dataset covering the repetitive regions on the reference genome of *human(hg38)*.

| RepLong                                                                        |                 |                 |                        | LongRepMarker                                                                    |                 |                        |
|--------------------------------------------------------------------------------|-----------------|-----------------|------------------------|----------------------------------------------------------------------------------|-----------------|------------------------|
| sequence: 455<br>total length: 3209286105bp<br>bases masked: 567067 bp (0.02%) |                 |                 |                        | sequence: 455<br>total length: 3209286105bp<br>bases masked: 31170736 bp (0.97%) |                 |                        |
| Repeat Types                                                                   | Num of elements | Length occupied | Percentage of sequence | Num of elements                                                                  | Length occupied | Percentage of sequence |
| <b>DNA:</b>                                                                    | 0               | 0bp             | 0.00%                  | 396                                                                              | 5512075bp       | 0.02%                  |
| -Academ-1:                                                                     | 0               | 0bp             | 0.00%                  | 4                                                                                | 4226bp          | 0.00%                  |
| -CMC-EnSpm:                                                                    | 0               | 0bp             | 0.00%                  | 3                                                                                | 1074bp          | 0.00%                  |
| -MuLE-MuDR:                                                                    | 0               | 0bp             | 0.00%                  | 1                                                                                | 3138bp          | 0.00%                  |
| -PIF-Harbinger:                                                                | 0               | 0bp             | 0.00%                  | 2                                                                                | 5611bp          | 0.00%                  |
| -PiggyBac:                                                                     | 0               | 0bp             | 0.00%                  | 45                                                                               | 4360bp          | 0.00%                  |
| -TcMar-Mariner:                                                                | 0               | 0bp             | 0.00%                  | 36                                                                               | 40639bp         | 0.00%                  |
| -TcMar-Tigger:                                                                 | 0               | 0bp             | 0.00%                  | 214                                                                              | 361402bp        | 0.01%                  |
| -hAT-Ac:                                                                       | 0               | 0bp             | 0.00%                  | 2                                                                                | 7020bp          | 0.00%                  |
| -hAT-Blackjack:                                                                | 0               | 0bp             | 0.00%                  | 1                                                                                | 812bp           | 0.00%                  |
| -hAT-Charlie:                                                                  | 0               | 0bp             | 0.00%                  | 88                                                                               | 122925bp        | 0.00%                  |
| <b>LINE:</b>                                                                   | 36              | 381497bp        | 0.01%                  | 4472                                                                             | 14812233bp      | 0.46%                  |
| -CR1:                                                                          | 0               | 0bp             | 0.00%                  | 4                                                                                | 13257bp         | 0.00%                  |
| -L1:                                                                           | 36              | 381497bp        | 0.01%                  | 4447                                                                             | 14671368bp      | 0.46%                  |
| -L2:                                                                           | 0               | 0bp             | 0.00%                  | 11                                                                               | 80124bp         | 0.00%                  |
| -OTHER:                                                                        | 0               | 0bp             | 0.00%                  | 10                                                                               | 55004bp         | 0.00%                  |
| <b>LTR:</b>                                                                    | 1               | 2525bp          | 0.00%                  | 1628                                                                             | 2403527bp       | 0.07%                  |
| -Copia:                                                                        | 0               | 0bp             | 0.00%                  | 7                                                                                | 1539bp          | 0.00%                  |
| -DIRS:                                                                         | 0               | 0bp             | 0.00%                  | 1                                                                                | 650bp           | 0.00%                  |
| -ERV:                                                                          | 0               | 0bp             | 0.00%                  | 4                                                                                | 20864bp         | 0.00%                  |
| -ERV1:                                                                         | 0               | 0bp             | 0.00%                  | 706                                                                              | 860621bp        | 0.03%                  |
| -ERVK:                                                                         | 0               | 0bp             | 0.00%                  | 82                                                                               | 218467bp        | 0.01%                  |
| -ERVL:                                                                         | 1               | 2525bp          | 0.00%                  | 537                                                                              | 1093366bp       | 0.03%                  |
| -ERVL-MaLR:                                                                    | 0               | 0bp             | 0.00%                  | 284                                                                              | 206370bp        | 0.01%                  |
| -Gypsy:                                                                        | 0               | 0bp             | 0.00%                  | 7                                                                                | 3073bp          | 0.00%                  |
| <b>RNA:</b>                                                                    | 0               | 0bp             | 0.00%                  | 4                                                                                | 564bp           | 0.00%                  |
| -OTHER:                                                                        | 0               | 0bp             | 0.00%                  | 4                                                                                | 564bp           | 0.00%                  |
| <b>Retroposon:</b>                                                             | 1               | 2849bp          | 0.00%                  | 16                                                                               | 45324bp         | 0.00%                  |
| -SVA:                                                                          | 1               | 2849bp          | 0.00%                  | 16                                                                               | 45324bp         | 0.00%                  |
| <b>SINE:</b>                                                                   | 8               | 89458bp         | 0.00%                  | 3999                                                                             | 10785656bp      | 0.34%                  |
| -Alu:                                                                          | 8               | 89458bp         | 0.00%                  | 3995                                                                             | 10781150bp      | 0.34%                  |
| -MIR:                                                                          | 0               | 0bp             | 0.00%                  | 4                                                                                | 4506bp          | 0.00%                  |
| <b>Satellite:</b>                                                              | 8               | 56176bp         | 0.00%                  | 478                                                                              | 1567189bp       | 0.05%                  |
| -OTHER:                                                                        | 2               | 6431bp          | 0.00%                  | 256                                                                              | 133037bp        | 0.00%                  |
| -Y-chromosome:                                                                 | 6               | 49745bp         | 0.00%                  | 205                                                                              | 1414782bp       | 0.04%                  |
| -centromeric:                                                                  | 0               | 0bp             | 0.00%                  | 17                                                                               | 24306bp         | 0.00%                  |
| <b>Simple:</b>                                                                 | 0               | 0bp             | 0.00%                  | 212                                                                              | 255167bp        | 0.01%                  |
| -repeat:                                                                       | 0               | 0bp             | 0.00%                  | 212                                                                              | 255167bp        | 0.01%                  |
| <b>Unknown:</b>                                                                | 3               | 34562bp         | 0.00%                  | 549                                                                              | 2334726bp       | 0.07%                  |
| -OTHER:                                                                        | 3               | 34562bp         | 0.00%                  | 549                                                                              | 2334726bp       | 0.07%                  |
| <b>tRNA:</b>                                                                   | 0               | 0bp             | 0.00%                  | 3                                                                                | 13351bp         | 0.00%                  |
| -OTHER:                                                                        | 0               | 0bp             | 0.00%                  | 3                                                                                | 13351bp         | 0.00%                  |



Table S52. The proportion and detailed classification of detection results generated by two tools based on dmel\_filtered dataset covering the repetitive regions on the reference genome of drosophila.

| RepLong                           |                 |                 |                        | LongRepMarker                      |                 |                        |
|-----------------------------------|-----------------|-----------------|------------------------|------------------------------------|-----------------|------------------------|
| sequence: 15                      |                 |                 |                        | sequence: 15                       |                 |                        |
| total length: 168736537bp         |                 |                 |                        | total length: 168736537bp          |                 |                        |
| bases masked: 11808450 bp (7.00%) |                 |                 |                        | bases masked: 45193046 bp (26.78%) |                 |                        |
| Repeat Types                      | Num of elements | Length occupied | Percentage of sequence | Num of elements                    | Length occupied | Percentage of sequence |
| <b>DNA:</b>                       | 417             | 223449bp        | 0.13%                  | 11162                              | 3357943bp       | 1.99%                  |
| -Academ-1:                        | 0               | 0bp             | 0.00%                  | 18                                 | 32652bp         | 0.02%                  |
| -Academ-H:                        | 0               | 0bp             | 0.00%                  | 7                                  | 4414bp          | 0.00%                  |
| -CMC-Chapaev:                     | 0               | 0bp             | 0.00%                  | 2                                  | 5540bp          | 0.00%                  |
| -CMC-EnSpm:                       | 0               | 0bp             | 0.00%                  | 313                                | 239334bp        | 0.14%                  |
| -CMC-Transib:                     | 8               | 5191bp          | 0.00%                  | 89                                 | 132453bp        | 0.08%                  |
| -Crypton-F:                       | 0               | 0bp             | 0.00%                  | 12                                 | 21341bp         | 0.01%                  |
| -Crypton-H:                       | 0               | 0bp             | 0.00%                  | 10                                 | 11836bp         | 0.01%                  |
| -Crypton-S:                       | 0               | 0bp             | 0.00%                  | 16                                 | 9749bp          | 0.01%                  |
| -Crypton-V:                       | 0               | 0bp             | 0.00%                  | 1                                  | 3852bp          | 0.00%                  |
| -Dada:                            | 0               | 0bp             | 0.00%                  | 22                                 | 36871bp         | 0.02%                  |
| -Kolobok:                         | 0               | 0bp             | 0.00%                  | 4                                  | 964bp           | 0.00%                  |
| -Kolobok-T2:                      | 0               | 0bp             | 0.00%                  | 61                                 | 59757bp         | 0.04%                  |
| -MULE-MuDR:                       | 0               | 0bp             | 0.00%                  | 113                                | 172365bp        | 0.10%                  |
| -MULE-NOF:                        | 63              | 39498bp         | 0.02%                  | 170                                | 108095bp        | 0.06%                  |
| -Maverick:                        | 0               | 0bp             | 0.00%                  | 56                                 | 84675bp         | 0.05%                  |
| -MuLE-NOF:                        | 0               | 0bp             | 0.00%                  | 4                                  | 7662bp          | 0.00%                  |
| -OTHER:                           | 0               | 0bp             | 0.00%                  | 5127                               | 169184bp        | 0.10%                  |
| -P:                               | 203             | 119252bp        | 0.07%                  | 2448                               | 576561bp        | 0.34%                  |
| -PIF-Harbinger:                   | 0               | 0bp             | 0.00%                  | 102                                | 126502bp        | 0.07%                  |
| -PIF-ISL2EU:                      | 0               | 0bp             | 0.00%                  | 10                                 | 25136bp         | 0.01%                  |
| -PIF-Spy:                         | 0               | 0bp             | 0.00%                  | 18                                 | 31163bp         | 0.02%                  |
| -PiggyBac:                        | 0               | 0bp             | 0.00%                  | 24                                 | 36090bp         | 0.02%                  |
| -PiggyBac-X:                      | 0               | 0bp             | 0.00%                  | 11                                 | 10672bp         | 0.01%                  |
| -Sola-1:                          | 0               | 0bp             | 0.00%                  | 2                                  | 1035bp          | 0.00%                  |
| -Sola-2:                          | 0               | 0bp             | 0.00%                  | 1                                  | 12632bp         | 0.01%                  |
| -TcMar-Ant1:                      | 0               | 0bp             | 0.00%                  | 5                                  | 20700bp         | 0.01%                  |
| -TcMar-Cweed:                     | 0               | 0bp             | 0.00%                  | 21                                 | 24396bp         | 0.01%                  |
| -TcMar-Fot1:                      | 0               | 0bp             | 0.00%                  | 27                                 | 30426bp         | 0.02%                  |
| -TcMar-ISRm11:                    | 0               | 0bp             | 0.00%                  | 36                                 | 34197bp         | 0.02%                  |
| -TcMar-Mariner:                   | 0               | 0bp             | 0.00%                  | 62                                 | 86226bp         | 0.05%                  |
| -TcMar-Pogo:                      | 0               | 0bp             | 0.00%                  | 844                                | 72555bp         | 0.04%                  |
| -TcMar-Stowaway:                  | 0               | 0bp             | 0.00%                  | 1                                  | 1959bp          | 0.00%                  |
| -TcMar-Tc1:                       | 55              | 28985bp         | 0.02%                  | 1004                               | 471642bp        | 0.28%                  |
| -TcMar-Tc2:                       | 0               | 0bp             | 0.00%                  | 3                                  | 41303bp         | 0.02%                  |
| -TcMar-Tc4:                       | 0               | 0bp             | 0.00%                  | 8                                  | 13442bp         | 0.01%                  |
| -Zator:                           | 0               | 0bp             | 0.00%                  | 2                                  | 11353bp         | 0.01%                  |
| -Zisupton:                        | 0               | 0bp             | 0.00%                  | 33                                 | 32305bp         | 0.02%                  |
| -hAT:                             | 0               | 0bp             | 0.00%                  | 33                                 | 28156bp         | 0.02%                  |
| -hAT-Ac:                          | 0               | 0bp             | 0.00%                  | 130                                | 225640bp        | 0.13%                  |
| -hAT-Blackjack:                   | 0               | 0bp             | 0.00%                  | 6                                  | 17312bp         | 0.01%                  |
| -hAT-Charlie:                     | 0               | 0bp             | 0.00%                  | 30                                 | 41926bp         | 0.02%                  |
| -hAT-Pegasus:                     | 0               | 0bp             | 0.00%                  | 9                                  | 7331bp          | 0.00%                  |
| -hAT-Tag1:                        | 0               | 0bp             | 0.00%                  | 9                                  | 10894bp         | 0.01%                  |
| -hAT-Tip100:                      | 0               | 0bp             | 0.00%                  | 70                                 | 101127bp        | 0.06%                  |
| -hAT-hAT19:                       | 0               | 0bp             | 0.00%                  | 9                                  | 16365bp         | 0.01%                  |
| -hAT-hAT5:                        | 0               | 0bp             | 0.00%                  | 7                                  | 11084bp         | 0.01%                  |
| -hAT-hATw:                        | 0               | 0bp             | 0.00%                  | 11                                 | 14610bp         | 0.01%                  |
| -hAT-hATx:                        | 0               | 0bp             | 0.00%                  | 15                                 | 12867bp         | 0.01%                  |
| -hAT-hobo:                        | 88              | 30523bp         | 0.02%                  | 146                                | 140805bp        | 0.08%                  |
| <b>LINE:</b>                      | 16977           | 4189163bp       | 2.48%                  | 103919                             | 9287397bp       | 5.50%                  |
| -CR1:                             | 30              | 41952bp         | 0.02%                  | 595                                | 648428bp        | 0.38%                  |
| -CR1-Zenon:                       | 0               | 0bp             | 0.00%                  | 17                                 | 23964bp         | 0.01%                  |
| -CRE:                             | 0               | 0bp             | 0.00%                  | 4                                  | 8204bp          | 0.00%                  |
| -I:                               | 371             | 126854bp        | 0.08%                  | 602                                | 288452bp        | 0.17%                  |
| -I-Jockey:                        | 1633            | 986651bp        | 0.58%                  | 12323                              | 3000052bp       | 1.78%                  |
| -Jockey:                          | 2991            | 1411229bp       | 0.84%                  | 17379                              | 2157429bp       | 1.28%                  |
| -L1:                              | 0               | 0bp             | 0.00%                  | 284                                | 341060bp        | 0.20%                  |
| -L1-Tx1:                          | 0               | 0bp             | 0.00%                  | 98                                 | 141618bp        | 0.08%                  |
| -L2:                              | 0               | 0bp             | 0.00%                  | 80                                 | 92941bp         | 0.06%                  |
| -LOA:                             | 8               | 35475bp         | 0.02%                  | 194                                | 37588bp         | 0.02%                  |
| -OTHER:                           | 653             | 512921bp        | 0.30%                  | 3980                               | 578051bp        | 0.34%                  |
| -Penelope:                        | 0               | 0bp             | 0.00%                  | 57                                 | 61763bp         | 0.04%                  |
| -Proto2:                          | 0               | 0bp             | 0.00%                  | 14                                 | 28853bp         | 0.02%                  |
| -R1:                              | 6576            | 1988893bp       | 1.18%                  | 55979                              | 3055649bp       | 1.81%                  |
| -R1-LOA:                          | 365             | 122428bp        | 0.07%                  | 30                                 | 29116bp         | 0.02%                  |
| -R2:                              | 4350            | 808229bp        | 0.48%                  | 12198                              | 950896bp        | 0.56%                  |
| -R2-NeSL:                         | 0               | 0bp             | 0.00%                  | 7                                  | 19021bp         | 0.01%                  |
| -RTE-BovB:                        | 0               | 0bp             | 0.00%                  | 31                                 | 46286bp         | 0.03%                  |
| -RTE-RTE:                         | 0               | 0bp             | 0.00%                  | 9                                  | 15719bp         | 0.01%                  |
| -Tad1:                            | 0               | 0bp             | 0.00%                  | 38                                 | 54789bp         | 0.03%                  |
| <b>LTR:</b>                       | 16863           | 7162246bp       | 4.24%                  | 105682                             | 13827910bp      | 8.19%                  |
| -Caulimovirus:                    | 0               | 0bp             | 0.00%                  | 18                                 | 61114bp         | 0.04%                  |
| -Copia:                           | 1690            | 515479bp        | 0.31%                  | 10466                              | 1755110bp       | 1.04%                  |
| -DIRS:                            | 0               | 0bp             | 0.00%                  | 43                                 | 78207bp         | 0.05%                  |
| -ERV-Foamy:                       | 0               | 0bp             | 0.00%                  | 16                                 | 24473bp         | 0.01%                  |
| -ERV1:                            | 0               | 0bp             | 0.00%                  | 102                                | 204122bp        | 0.12%                  |
| -ERV4:                            | 0               | 0bp             | 0.00%                  | 24                                 | 36215bp         | 0.02%                  |
| -ERVK:                            | 0               | 0bp             | 0.00%                  | 70                                 | 88760bp         | 0.05%                  |
| -ERVL:                            | 0               | 0bp             | 0.00%                  | 10                                 | 13218bp         | 0.01%                  |
| -Gypsy:                           | 11817           | 5056654bp       | 3.00%                  | 42655                              | 9056526bp       | 5.37%                  |
| -Ngaro:                           | 0               | 0bp             | 0.00%                  | 15                                 | 20648bp         | 0.01%                  |
| -OTHER:                           | 178             | 401090bp        | 0.24%                  | 1942                               | 446355bp        | 0.26%                  |
| -Pao:                             | 3178            | 1731467bp       | 1.03%                  | 50321                              | 2948938bp       | 1.75%                  |
| <b>Other:</b>                     | 1529            | 9445bp          | 0.01%                  | 5245                               | 381735bp        | 0.23%                  |
| -OTHER:                           | 1529            | 9445bp          | 0.01%                  | 5245                               | 381735bp        | 0.23%                  |
| <b>RC:</b>                        | 6               | 13723bp         | 0.01%                  | 2413                               | 2506443bp       | 1.49%                  |
| -Helitron:                        | 6               | 13723bp         | 0.01%                  | 2413                               | 2506443bp       | 1.49%                  |
| <b>Retroposon:</b>                | 0               | 0bp             | 0.00%                  | 36                                 | 42026bp         | 0.02%                  |
| -L1:                              | 0               | 0bp             | 0.00%                  | 13                                 | 10051bp         | 0.01%                  |
| -SVA:                             | 0               | 0bp             | 0.00%                  | 23                                 | 31975bp         | 0.02%                  |
| <b>SINE:</b>                      | 0               | 0bp             | 0.00%                  | 11                                 | 9265bp          | 0.01%                  |
| -ID:                              | 0               | 0bp             | 0.00%                  | 11                                 | 9265bp          | 0.01%                  |
| <b>SINE?:</b>                     | 0               | 0bp             | 0.00%                  | 31                                 | 41984bp         | 0.02%                  |
| -OTHER:                           | 0               | 0bp             | 0.00%                  | 31                                 | 41984bp         | 0.02%                  |
| <b>Satellite:</b>                 | 1787            | 538934bp        | 0.32%                  | 133184                             | 4745508bp       | 2.81%                  |
| -OTHER:                           | 1787            | 538934bp        | 0.32%                  | 133184                             | 4745508bp       | 2.81%                  |
| <b>Simple:</b>                    | 14942           | 85425bp         | 0.05%                  | 263786                             | 562282bp        | 0.33%                  |
| -repeat:                          | 14942           | 85425bp         | 0.05%                  | 263786                             | 562282bp        | 0.33%                  |
| <b>Unknown:</b>                   | 5000            | 640969bp        | 0.38%                  | 89301                              | 15112684bp      | 8.96%                  |
| -OTHER:                           | 5000            | 640969bp        | 0.38%                  | 89301                              | 15112684bp      | 8.96%                  |
| <b>rRNA:</b>                      | 25627           | 1658931bp       | 0.98%                  | 49815                              | 1857060bp       | 1.10%                  |
| -OTHER:                           | 25627           | 1658931bp       | 0.98%                  | 49815                              | 1857060bp       | 1.10%                  |
| <b>snRNA:</b>                     | 0               | 0bp             | 0.00%                  | 14                                 | 13618bp         | 0.01%                  |
| -OTHER:                           | 0               | 0bp             | 0.00%                  | 14                                 | 13618bp         | 0.01%                  |
| <b>tRNA:</b>                      | 0               | 0bp             | 0.00%                  | 251                                | 281363bp        | 0.17%                  |
| -OTHER:                           | 0               | 0bp             | 0.00%                  | 251                                | 281363bp        | 0.17%                  |

**Table S53.** The proportion and detailed classification of detection results generated by two tools based on human\_polished dataset covering the repetitive regions on the reference genome of human(hg38).

| RepLong                           |                 |                 |                        | LongRepMarker                       |                 |                        |
|-----------------------------------|-----------------|-----------------|------------------------|-------------------------------------|-----------------|------------------------|
| sequence: 455                     |                 |                 |                        | sequence: 455                       |                 |                        |
| total length: 3209286105bp        |                 |                 |                        | total length: 3209286105bp          |                 |                        |
| bases masked: 51105613 bp (1.59%) |                 |                 |                        | bases masked: 698754064 bp (21.77%) |                 |                        |
| Repeat Types                      | Num of elements | Length occupied | Percentage of sequence | Num of elements                     | Length occupied | Percentage of sequence |
| <b>DNA:</b>                       | 33              | 294043bp        | 0.01%                  | 13963                               | 14730125bp      | 0.46%                  |
| -Academ-1:                        | 0               | 0bp             | 0.00%                  | 255                                 | 388681bp        | 0.01%                  |
| -Academ-H:                        | 0               | 0bp             | 0.00%                  | 2                                   | 5572bp          | 0.00%                  |
| -CMC-EnSpm:                       | 0               | 0bp             | 0.00%                  | 273                                 | 82737bp         | 0.00%                  |
| -CMC-Transib:                     | 0               | 0bp             | 0.00%                  | 18                                  | 2358bp          | 0.00%                  |
| -Crypton:                         | 0               | 0bp             | 0.00%                  | 12                                  | 21456bp         | 0.00%                  |
| -Crypton-A:                       | 0               | 0bp             | 0.00%                  | 2                                   | 622bp           | 0.00%                  |
| -Crypton-I:                       | 0               | 0bp             | 0.00%                  | 2                                   | 2557bp          | 0.00%                  |
| -Crypton-S:                       | 0               | 0bp             | 0.00%                  | 2                                   | 767bp           | 0.00%                  |
| -Crypton-V:                       | 0               | 0bp             | 0.00%                  | 4                                   | 3831bp          | 0.00%                  |
| -Dada:                            | 0               | 0bp             | 0.00%                  | 2                                   | 1529bp          | 0.00%                  |
| -Ginger:                          | 0               | 0bp             | 0.00%                  | 28                                  | 7771bp          | 0.00%                  |
| -Kolobok-T2:                      | 0               | 0bp             | 0.00%                  | 2                                   | 3182bp          | 0.00%                  |
| -MULE-MuDR:                       | 0               | 0bp             | 0.00%                  | 29                                  | 29452bp         | 0.00%                  |
| -Maverick:                        | 0               | 0bp             | 0.00%                  | 12                                  | 20019bp         | 0.00%                  |
| -Merlin:                          | 0               | 0bp             | 0.00%                  | 12                                  | 8369bp          | 0.00%                  |
| -MuLE-MuDR:                       | 1               | 11882bp         | 0.00%                  | 49                                  | 77343bp         | 0.00%                  |
| -Novosib:                         | 0               | 0bp             | 0.00%                  | 9                                   | 456bp           | 0.00%                  |
| -OTHER:                           | 0               | 0bp             | 0.00%                  | 205                                 | 253903bp        | 0.01%                  |
| -P:                               | 0               | 0bp             | 0.00%                  | 2                                   | 1097bp          | 0.00%                  |
| -PIF-Harbinger:                   | 0               | 0bp             | 0.00%                  | 14                                  | 21798bp         | 0.00%                  |
| -PiggyBac:                        | 0               | 0bp             | 0.00%                  | 55                                  | 50936bp         | 0.00%                  |
| -Sola-1:                          | 0               | 0bp             | 0.00%                  | 2                                   | 2557bp          | 0.00%                  |
| -Sola-2:                          | 0               | 0bp             | 0.00%                  | 4                                   | 3465bp          | 0.00%                  |
| -Sola-3:                          | 0               | 0bp             | 0.00%                  | 6                                   | 3564bp          | 0.00%                  |
| -TcMar:                           | 0               | 0bp             | 0.00%                  | 6                                   | 3705bp          | 0.00%                  |
| -TcMar-Fot1:                      | 0               | 0bp             | 0.00%                  | 6                                   | 3479bp          | 0.00%                  |
| -TcMar-ISRm11:                    | 0               | 0bp             | 0.00%                  | 2                                   | 583bp           | 0.00%                  |
| -TcMar-Mariner:                   | 0               | 0bp             | 0.00%                  | 363                                 | 676972bp        | 0.02%                  |
| -TcMar-Sagan:                     | 0               | 0bp             | 0.00%                  | 2                                   | 526bp           | 0.00%                  |
| -TcMar-Tc1:                       | 0               | 0bp             | 0.00%                  | 22                                  | 42807bp         | 0.00%                  |
| -TcMar-Tc2:                       | 0               | 0bp             | 0.00%                  | 96                                  | 138622bp        | 0.00%                  |
| -TcMar-Tigger:                    | 17              | 164448bp        | 0.01%                  | 3987                                | 7057574bp       | 0.22%                  |
| -Zator:                           | 0               | 0bp             | 0.00%                  | 2                                   | 3176bp          | 0.00%                  |
| -Zisupton:                        | 0               | 0bp             | 0.00%                  | 3925                                | 146143bp        | 0.00%                  |
| -hAT:                             | 0               | 0bp             | 0.00%                  | 44                                  | 21983bp         | 0.00%                  |
| -hAT-Ac:                          | 2               | 22601bp         | 0.00%                  | 48                                  | 99506bp         | 0.00%                  |
| -hAT-Blackjack:                   | 1               | 7554bp          | 0.00%                  | 155                                 | 170949bp        | 0.01%                  |
| -hAT-Charlie:                     | 10              | 68709bp         | 0.00%                  | 3557                                | 4535663bp       | 0.14%                  |
| -hAT-Pegasus:                     | 0               | 0bp             | 0.00%                  | 2                                   | 2020bp          | 0.00%                  |
| -hAT-Tag1:                        | 0               | 0bp             | 0.00%                  | 30                                  | 25258bp         | 0.00%                  |
| -hAT-Tip100:                      | 2               | 18849bp         | 0.00%                  | 709                                 | 888475bp        | 0.03%                  |
| -hAT-hAT1:                        | 0               | 0bp             | 0.00%                  | 2                                   | 1583bp          | 0.00%                  |
| -hAT-hATm:                        | 0               | 0bp             | 0.00%                  | 4                                   | 2279bp          | 0.00%                  |
| <b>DNA?:</b>                      | 0               | 0bp             | 0.00%                  | 10                                  | 8332bp          | 0.00%                  |
| -PiggyBac:                        | 0               | 0bp             | 0.00%                  | 2                                   | 1065bp          | 0.00%                  |
| -hAT:                             | 0               | 0bp             | 0.00%                  | 6                                   | 3417bp          | 0.00%                  |
| -hAT-Tip100:                      | 0               | 0bp             | 0.00%                  | 2                                   | 3850bp          | 0.00%                  |
| <b>LINE:</b>                      | 4030            | 32158646bp      | 1.00%                  | 129957                              | 306015073bp     | 9.54%                  |
| -CR1:                             | 1               | 9166bp          | 0.00%                  | 477                                 | 818172bp        | 0.03%                  |
| -CRE:                             | 0               | 0bp             | 0.00%                  | 8                                   | 12564bp         | 0.00%                  |
| -Dong-R4:                         | 0               | 0bp             | 0.00%                  | 14                                  | 55288bp         | 0.00%                  |
| -I:                               | 0               | 0bp             | 0.00%                  | 8                                   | 3595bp          | 0.00%                  |
| -I-Jockey:                        | 0               | 0bp             | 0.00%                  | 24                                  | 19361bp         | 0.00%                  |
| -Jockey:                          | 0               | 0bp             | 0.00%                  | 2                                   | 9723bp          | 0.00%                  |
| -L1:                              | 3990            | 31825325bp      | 0.99%                  | 125281                              | 298299458bp     | 9.29%                  |
| -L1-Tx1:                          | 0               | 0bp             | 0.00%                  | 24                                  | 17164bp         | 0.00%                  |
| -L2:                              | 20              | 158438bp        | 0.00%                  | 3466                                | 5158961bp       | 0.16%                  |
| -OTHER:                           | 19              | 212718bp        | 0.01%                  | 408                                 | 1895218bp       | 0.06%                  |
| -Penelope:                        | 0               | 0bp             | 0.00%                  | 6                                   | 4547bp          | 0.00%                  |
| -R1:                              | 0               | 0bp             | 0.00%                  | 5                                   | 1795bp          | 0.00%                  |
| -R1-LOA:                          | 0               | 0bp             | 0.00%                  | 2                                   | 586bp           | 0.00%                  |
| -R2:                              | 0               | 0bp             | 0.00%                  | 4                                   | 10887bp         | 0.00%                  |
| -R2-NeSL:                         | 0               | 0bp             | 0.00%                  | 2                                   | 6307bp          | 0.00%                  |
| -RTE-BovB:                        | 0               | 0bp             | 0.00%                  | 46                                  | 65023bp         | 0.00%                  |
| -RTE-RTE:                         | 0               | 0bp             | 0.00%                  | 2                                   | 583bp           | 0.00%                  |
| -RTE-X:                           | 0               | 0bp             | 0.00%                  | 164                                 | 183832bp        | 0.01%                  |
| -Rex-Babar:                       | 0               | 0bp             | 0.00%                  | 4                                   | 8888bp          | 0.00%                  |
| -Tad1:                            | 0               | 0bp             | 0.00%                  | 10                                  | 6929bp          | 0.00%                  |
| <b>LTR:</b>                       | 322             | 1819104bp       | 0.06%                  | 22677                               | 34498883bp      | 1.07%                  |
| -Caulimovirus:                    | 0               | 0bp             | 0.00%                  | 6                                   | 9350bp          | 0.00%                  |
| -Copia:                           | 0               | 0bp             | 0.00%                  | 143                                 | 121612bp        | 0.00%                  |
| -DIRS:                            | 0               | 0bp             | 0.00%                  | 12                                  | 7553bp          | 0.00%                  |
| -ERV:                             | 0               | 0bp             | 0.00%                  | 68                                  | 268741bp        | 0.01%                  |
| -ERV1:                            | 169             | 663109bp        | 0.02%                  | 6629                                | 10678063bp      | 0.33%                  |
| -ERVK:                            | 5               | 11034bp         | 0.00%                  | 1114                                | 1996168bp       | 0.06%                  |
| -ERVL:                            | 144             | 1125666bp       | 0.04%                  | 6511                                | 12322032bp      | 0.38%                  |
| -ERVL-MaLR:                       | 3               | 15671bp         | 0.00%                  | 7388                                | 8684526bp       | 0.27%                  |
| -Gypsy:                           | 0               | 0bp             | 0.00%                  | 587                                 | 440325bp        | 0.01%                  |
| -Ngaro:                           | 0               | 0bp             | 0.00%                  | 14                                  | 16541bp         | 0.00%                  |
| -OTHER:                           | 1               | 3624bp          | 0.00%                  | 183                                 | 125577bp        | 0.00%                  |
| -Pao:                             | 0               | 0bp             | 0.00%                  | 22                                  | 14958bp         | 0.00%                  |
| <b>RC:</b>                        | 0               | 0bp             | 0.00%                  | 45                                  | 30615bp         | 0.00%                  |
| -Helitron:                        | 0               | 0bp             | 0.00%                  | 45                                  | 30615bp         | 0.00%                  |
| <b>RNA:</b>                       | 0               | 0bp             | 0.00%                  | 20                                  | 19129bp         | 0.00%                  |
| -OTHER:                           | 0               | 0bp             | 0.00%                  | 20                                  | 19129bp         | 0.00%                  |
| <b>Retroposon:</b>                | 49              | 250625bp        | 0.01%                  | 1454                                | 1762391bp       | 0.05%                  |
| -SVA:                             | 49              | 250625bp        | 0.01%                  | 1454                                | 1762391bp       | 0.05%                  |
| <b>SINE:</b>                      | 1239            | 9701289bp       | 0.30%                  | 122000                              | 263525569bp     | 8.21%                  |
| -5S:                              | 0               | 0bp             | 0.00%                  | 6                                   | 2915bp          | 0.00%                  |
| -5S-Deu-L2:                       | 0               | 0bp             | 0.00%                  | 14                                  | 13637bp         | 0.00%                  |
| -Alu:                             | 1239            | 9701289bp       | 0.30%                  | 115426                              | 255871934bp     | 7.97%                  |
| -L2:                              | 0               | 0bp             | 0.00%                  | 8                                   | 3683bp          | 0.00%                  |
| -MIR:                             | 0               | 0bp             | 0.00%                  | 6518                                | 7846668bp       | 0.24%                  |
| -U:                               | 0               | 0bp             | 0.00%                  | 2                                   | 860bp           | 0.00%                  |
| -tRNA:                            | 0               | 0bp             | 0.00%                  | 4                                   | 2594bp          | 0.00%                  |
| -tRNA-7SL:                        | 0               | 0bp             | 0.00%                  | 2                                   | 508bp           | 0.00%                  |
| -tRNA-Core-L2:                    | 0               | 0bp             | 0.00%                  | 4                                   | 1422bp          | 0.00%                  |
| -tRNA-Deu:                        | 0               | 0bp             | 0.00%                  | 6                                   | 1953bp          | 0.00%                  |
| -tRNA-RTE:                        | 0               | 0bp             | 0.00%                  | 10                                  | 4467bp          | 0.00%                  |
| <b>Satellite:</b>                 | 1705            | 4475526bp       | 0.14%                  | 260908                              | 58245890bp      | 1.81%                  |
| -OTHER:                           | 319             | 209323bp        | 0.01%                  | 34753                               | 1735367bp       | 0.05%                  |
| -Y-chromosome:                    | 1381            | 4258059bp       | 0.13%                  | 222817                              | 55872645bp      | 1.74%                  |
| -acromeric:                       | 0               | 0bp             | 0.00%                  | 193                                 | 184934bp        | 0.01%                  |
| -centromeric:                     | 5               | 8144bp          | 0.00%                  | 3098                                | 1698524bp       | 0.05%                  |
| -telomeric:                       | 0               | 0bp             | 0.00%                  | 47                                  | 47932bp         | 0.00%                  |
| <b>Simple:</b>                    | 858             | 678220bp        | 0.02%                  | 73682                               | 1795242bp       | 0.06%                  |
| -repeat:                          | 858             | 678220bp        | 0.02%                  | 73682                               | 1795242bp       | 0.06%                  |
| <b>Unknown:</b>                   | 424             | 3443330bp       | 0.11%                  | 54472                               | 66289814bp      | 2.07%                  |
| -OTHER:                           | 424             | 3443330bp       | 0.11%                  | 54472                               | 66289814bp      | 2.07%                  |
| <b>rRNA:</b>                      | 0               | 0bp             | 0.00%                  | 155                                 | 179538bp        | 0.01%                  |
| -OTHER:                           | 0               | 0bp             | 0.00%                  | 155                                 | 179538bp        | 0.01%                  |
| <b>scRNA:</b>                     | 0               | 0bp             | 0.00%                  | 8                                   | 6150bp          | 0.00%                  |
| -OTHER:                           | 0               | 0bp             | 0.00%                  | 8                                   | 6150bp          | 0.00%                  |
| <b>snRNA:</b>                     | 0               | 0bp             | 0.00%                  | 25                                  | 19397bp         | 0.00%                  |
| -OTHER:                           | 0               | 0bp             | 0.00%                  | 25                                  | 19397bp         | 0.00%                  |
| <b>tRNA:</b>                      | 0               | 0bp             | 0.00%                  | 15                                  | 8361bp          | 0.00%                  |
| -OTHER:                           | 0               | 0bp             | 0.00%                  | 15                                  | 8361bp          | 0.00%                  |

### 3.6 Running time and peak memory consumption statistics

LongRepMarker has problems with long running time and large memory requirements on all NGS short read datasets. To confirm this problem, we tested the running time and peak memory consumptions of four tools (LongRepMarker, RepARK, REPdenovo and RepLong) on seven datasets (Human-chr14, Leafcutter ant, D.melano, Mouse, HG004\_NA24143\_father, Dro\_100k and Human\_100k), just as shown in Fig S31. Through the analysis of the running time and peak memory consumptions of each step in the LongRepMarker processing flow, we found that the sequence assembly consumes the most running time and memory. Therefore, as long as the running time and memory consumptions of this step can be controlled by adjusting the parameters  $W$  and  $t$ , the tool can still run normally under the condition of limited resources. SPAdes uses 512 Mb per thread for buffers, which results in higher memory consumption (The default value of parameters  $W$  and  $t$  in SPAdes are set to 250GB and 16 respectively). If you set memory limit manually, SPAdes will use smaller buffers and thus less RAM. The parameter  $W$  set memory limit in Gb. SPAdes terminates if it reaches this limit. Actual amount of consumed RAM will be below this limit. Make sure this value is correct for the given machine. SPAdes uses the limit value to automatically determine the sizes of various buffers, etc. The parameter  $t$  is used to set the number of threads using in SPAdes assembly, and the default value of it is 16. The larger the number of threads is, the faster the SPAdes assembly speed, and the memory consumption will also increase.

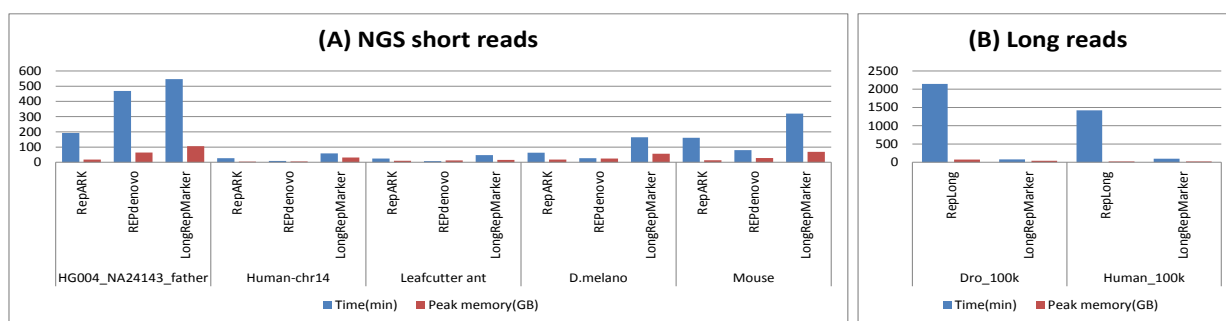

Fig. S31. Comparison of the running time and peak memory consumption of four tools on seven datasets.

### 3.7 Performance evaluation of structural variation detection in *de novo* mode

LongRepMarker is designed based on technologies of the *de novo* sequence assembly and multiple sequence alignment to identify repetitive regions in a genome (Fig. S32). From the perspective of implementation principles, it can identify the genomic structural variations contained in the repetitive sequences. The genomic variation regions between repeating segments generate a chimeras, which can negatively affect the alignment of entire segment. Chimeras consist of two or more repetitive regions and some genomic variation regions, which cannot be aligned to overlap sequences many times. However, the genomic variation regions between repeating segments are also the important component of repeating regions, and they are an important manifestation of repetitive regions polymorphism. In addition, the study and analysis of genomic structural variations that occur within the repetitive regions can provide a new perspective for understanding life processes and analyzing life mechanisms. Based on the above reasons, we have completely preserved the genomic variations that occur inside the repetitive regions along with the repetitive fragments.

In this step, LongRepMarker mainly analyzes the four kinds of mutations that occur in the repetitive regions, which are insertion, deletion, inversion and translocation. Among them, insertion refers to an extra sequence segment in a repetitive region that does not belong to this region; Deletion refers to a missing sequence segment in the repetitive region that should belong to this region; Inversion refers to a pair of repeats in which there is a sub segment with opposite alignment direction. If the positions of these two sub fragments are swapped, the pair of repeats match perfectly; Translocation refers to a pair of repeats in which there is a sub segment from each other at different locations. If the positions of these two fragments are swapped, the pair of repeats match perfectly. The alignment results generated from section 2.5 are the basic for the analysis in this section. The detection methods of four kinds of mutations are introduced in detail in the following sections.

In the insertion and deletion discovering, if there is a pair of sequence fragments A and B, all the subsequences of fragment B belong to the fragment A, but there are some subsequences in fragment A that dose not belong to fragment B, just as shown in Fig.S19(D). Those subsequences distributed in the middle of fragment A can be identified as insertions in fragment A or deletions in fragment B. To further determine whether these subsequences are insertions or deletions, LongRepMarker needs the support of the reference genome. By mapping the detected repetitive fragments to the reference genome, the matching regions and the differences between them can be obtained. For example, if there is a segment in fragment A that dose not exist in the reference genome, then this segment should be an insertion variation of the sequenced sample. However, whether the insertion variation belongs to the category of structural variation further depends on its size. If its size is greater than 50bp, it is an insertion in the concept of structural variation. If its size is less than 50bp, it can only be regarded as a micro insertion variation. Similarly, if there is a segment in reference genome that dose not exist in fragment B, then this segment should be a deletion variation of the sequenced sample. Among the alignment results produced by the alignment tool, there is a column of data called cigar, which details the alignment between the fragments and the reference sequences. For example, when the cigar value of a record is '87M109I547D', it means that the sub-segment in the region [0,86] on the segment is completely matched to the reference genome, the sub-segments in the region [87,195] can not be found on the reference genome, and the following region marked as [196,742] does not present on the segment, but it can be found on the reference genome. Therefore, by analyzing the cigar string of the alignment results, we can get the mutations that occurred in the detection fragments. For example, we also perform a simple analysis of the structural variations contained in the detected repetitive sequences. For example, a structural variation (deletion) detected by LongRepMarker in the dataset of *Drosophila melanogaster* is shown in Fig. S33. This figure is obtained by mapping the detection results of LongRepMarker to the reference genome with the evaluation tool minimap2. In Fig. S33, symbol 'gi' represents a chromosome in the *Drosophila*

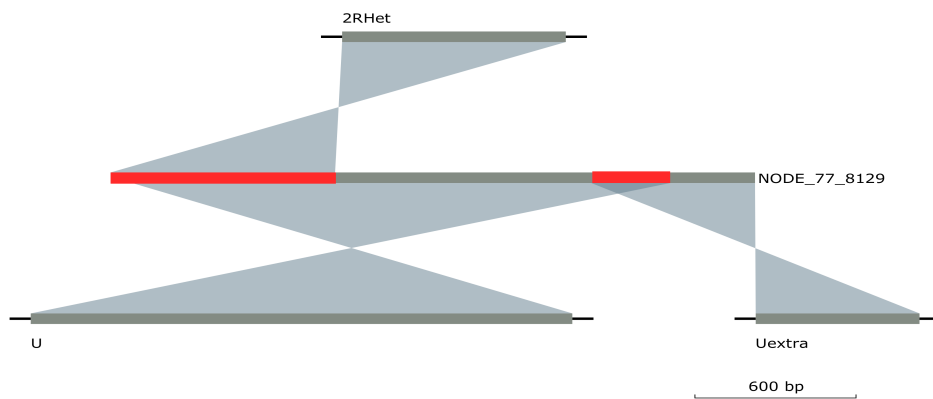

**Fig. S32.** An example of the structure of repetitive regions between multiple chromosomes found on *Drosophila melanogaster* dataset. '*NODE\_77\_8129*' indicates the repetitive fragment which detected by LongRepMarker. '*2RHet*', '*u*' and '*Uextra*' represent three different chromosomes in the *Drosophila melanogaster* genome, respectively. Twisted shading between fragments indicates reverse alignment.

melanogaster genome. The shaded areas indicate the alignment, and the gaps indicate the deletion that occurs in the detected fragment. Fig. S33 shows that LongRepMarker can accurately identify the structural variations (such as insertion, deletion, inversion and translocations) contained in the repeat regions. The detailed INDEL (Insertion and deletion) variants found in LongRepMarker's detection results on seven sequencing samples (Ant, human-chr14, drosophila, mouse, HG003\_NA24149\_father, HG002\_NA24385\_Son and HG004\_NA24143\_mother) are summarized in Tables S54-S60.

In inversion discovering, if in a pair of fragments A and B there are some sub segments with the opposite alignment direction, and if the positions of these sub fragments are swapped, the pair of fragments A and B match perfectly. Those sub segments with the opposite alignment direction may be inversions in this pair of repeats. During the detection process, LongRepMarker needs to determine the position, length and the alignment direction of subsegments in fragments A, and their corresponding alignment segments on the reference genome. By analyzing the position, length and alignment direction of sub-fragments, the inversion in the fragment pairs between query sequences and the reference genome can be accurately determined. The alignment results generated from section 2.5 are the basic for the inversion discovering. In translocation discovering, consider that a pair of fragments A and B have some subsegments C and D belong respectively. For example, segment C should have belonged to B, but now it is embedded in A, segment D should have belonged to A, but now it is embedded in B. If the positions of these two fragments C and D are swapped, the pair of repeats match perfectly, these sub segments may be translocation in this pair of repeats. The alignment results generated from section 2.5 are also the basic for the translocation discovering. The INDEL (insertion and deletion) mutations within repetitive sequences are usually easy to be found, but it is very difficult for LongRepMarker to find and determine the inversion and translocation mutations that occur within the repetitive sequences. In order to ensure the accuracy and reliability of detection, LongRepMarker needs the assistance of two tools, ngmlr (<https://github.com/philres/ngmlr>) and Sniffles (<https://github.com/fritzsedlazeck/Sniffles>), when detecting inversion and inversion mutations that occur within the repetitive sequences. Since detections of inversion and inversion mutations in LongRepMarker are done with the support of other tools, so the results of these two detections are not shown here.

The structural variation detection report of LongRepMarker contains the information of SNPs, INDELS, inversions and translocations. Finally, LongRepMarker generates a VCF format structural variation statistical report in the detection results, as shown in Figure S11. VCF (Variant Calling Format) is a tab-delimited text file that is used to describe single nucleotide variants (SNVs) as well as insertions, deletions, and other sequence variations.

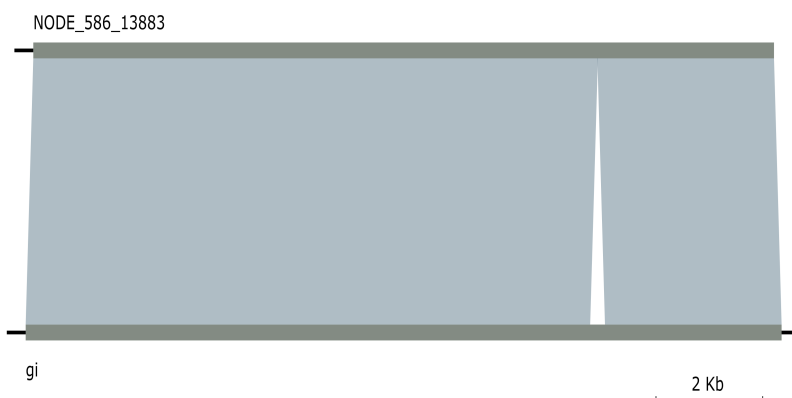

**Fig. S33.** An example of the structural variation (deletion) found by LongRepMarker on human-chr14 dataset. '*NODE\_586\_13883*' indicates the repetitive fragment which detected by LongRepMarker. '*gi*' represents a chromosome in the reference genome of human-chr14. The shaded areas indicate the alignment, and the gaps indicate the deletion that occurred in the detected fragment.

Table S54. Partial INDEL variation statistics of detection results generated by the *de novo* mode of LongRepMarker on the drosophila dataset.

| Repeat fragment id | Location on Fragment | Reference id | Location on Ref. | Variation/Length. |
|--------------------|----------------------|--------------|------------------|-------------------|
| NODE_80_7585       | 1526                 | 2R           | 8678507          | Deletion/462bp    |
| NODE_80_7585       | 1526                 | 3L           | 24007213         | Deletion/449bp    |
| NODE_847_2791      | 1172                 | 2L           | 22773069         | Deletion/381bp    |
| NODE_1628_1445     | 584                  | 3R           | 17435374         | Deletion/1003bp   |
| NODE_1628_1445     | 580                  | X            | 21925103         | Deletion/1189bp   |
| NODE_1628_1445     | 871                  | 3R           | 17435652         | Deletion/1151bp   |
| NODE_282_5678      | 3834                 | 2RHet        | 1127969          | Insertion/460bp   |
| NODE_1020_2324     | 1849                 | U            | 2915525          | Deletion/402bp    |
| NODE_2508_1056     | 575                  | 2L           | 8015354          | Deletion/417bp    |
| NODE_2508_1056     | 473                  | 2L           | 11566727         | Deletion/417bp    |
| NODE_2508_1056     | 473                  | X            | 14715888         | Deletion/417bp    |
| NODE_2508_1056     | 473                  | 3R           | 15938353         | Deletion/417bp    |
| NODE_2508_1056     | 575                  | 2L           | 20160701         | Deletion/417bp    |
| NODE_1706_1380     | 1048                 | 3R           | 17435828         | Deletion/832bp    |
| NODE_12850_624     | 315                  | 3R           | 19665344         | Deletion/385bp    |
| NODE_12850_624     | 315                  | 2R           | 21033391         | Deletion/379bp    |
| NODE_12850_624     | 312                  | X            | 10165933         | Deletion/385bp    |
| NODE_12850_624     | 312                  | X            | 16120612         | Deletion/385bp    |
| NODE_3268_912      | 539                  | 3RHet        | 808287           | Deletion/391bp    |
| NODE_3268_912      | 539                  | 3RHet        | 1058889          | Deletion/381bp    |
| NODE_3268_912      | 371                  | 3LHet        | 643037           | Deletion/378bp    |
| NODE_3268_912      | 371                  | 2L           | 22574496         | Deletion/379bp    |
| NODE_1188_1997     | 1226                 | X            | 18852406         | Deletion/421bp    |
| NODE_3383_894      | 435                  | Uextra       | 677898           | Deletion/406bp    |
| NODE_3383_894      | 435                  | 3RHet        | 2013216          | Deletion/420bp    |
| NODE_3383_894      | 435                  | U            | 2054869          | Deletion/420bp    |
| NODE_3383_894      | 505                  | 2RHet        | 323045           | Deletion/420bp    |
| NODE_143_7329      | 1926                 | 3LHet        | 1240631          | Insertion/426bp   |
| NODE_725_3289      | 2288                 | 3LHet        | 341984           | Deletion/433bp    |
| NODE_1211_1957     | 1591                 | 3RHet        | 1796974          | Deletion/371bp    |
| NODE_1437_1661     | 977                  | 3L           | 6406260          | Deletion/404bp    |
| NODE_1437_1661     | 977                  | 3L           | 6423567          | Deletion/404bp    |
| NODE_1437_1661     | 683                  | 3R           | 18066515         | Deletion/404bp    |
| NODE_1437_1661     | 977                  | 3R           | 25715242         | Deletion/404bp    |
| NODE_2419_1076     | 585                  | 3R           | 833296           | Deletion/370bp    |
| NODE_2419_1076     | 585                  | U            | 1305472          | Deletion/370bp    |
| NODE_2419_1076     | 503                  | 2R           | 5615377          | Deletion/370bp    |
| NODE_2419_1076     | 585                  | 3L           | 10059225         | Deletion/370bp    |
| NODE_2419_1076     | 585                  | 3L           | 11262940         | Deletion/370bp    |
| NODE_1197_1980     | 1161                 | 3R           | 18277464         | Deletion/770bp    |
| NODE_580_4119      | 3012                 | 3LHet        | 1171134          | Deletion/464bp    |
| NODE_580_4119      | 3012                 | 2R           | 16673984         | Deletion/464bp    |
| NODE_580_4119      | 3012                 | 2L           | 17276389         | Deletion/464bp    |
| NODE_580_4119      | 1108                 | 2R           | 219417           | Deletion/464bp    |
| NODE_580_4119      | 1108                 | 3LHet        | 1012372          | Deletion/464bp    |
| NODE_1078_2215     | 570                  | 3LHet        | 1583478          | Deletion/435bp    |
| NODE_3425_889      | 651                  | 2L           | 12784671         | Deletion/388bp    |
| NODE_3425_889      | 656                  | X            | 6068489          | Deletion/388bp    |
| NODE_3425_889      | 250                  | 2L           | 15724376         | Deletion/388bp    |
| NODE_3425_889      | 250                  | 3L           | 22809548         | Deletion/388bp    |
| NODE_1480_1612     | 769                  | X            | 2718952          | Deletion/411bp    |
| NODE_158_7230      | 6754                 | 2R           | 1796459          | Deletion/404bp    |
| NODE_158_7230      | 6745                 | X            | 3654240          | Deletion/407bp    |
| NODE_158_7230      | 6769                 | 3L           | 10060023         | Deletion/427bp    |
| NODE_158_7230      | 631                  | 2R           | 5614720          | Deletion/428bp    |
| NODE_158_7230      | 627                  | 3L           | 24211428         | Deletion/417bp    |
| NODE_5872_739      | 356                  | 3L           | 18766517         | Deletion/489bp    |
| NODE_5872_739      | 356                  | X            | 18852111         | Deletion/396bp    |
| NODE_14483_586     | 313                  | 3L           | 18766795         | Deletion/403bp    |
| NODE_404_4981      | 4734                 | 3LHet        | 539937           | Deletion/437bp    |
| NODE_264_5990      | 4175                 | X            | 727684           | Insertion/495bp   |
| NODE_2862_978      | 429                  | 2LHet        | 241152           | Deletion/413bp    |
| NODE_2862_978      | 429                  | 3RHet        | 1277786          | Deletion/410bp    |
| NODE_2862_978      | 554                  | 2RHet        | 1432111          | Deletion/414bp    |
| NODE_2862_978      | 554                  | X            | 21331292         | Deletion/414bp    |
| NODE_2862_978      | 429                  | 3L           | 22757987         | Deletion/414bp    |
| NODE_207_6588      | 775                  | 3RHet        | 2274615          | Insertion/434bp   |
| NODE_6012_736      | 444                  | U            | 7172533          | Deletion/445bp    |
| NODE_94_7495       | 2068                 | 3LHet        | 1240774          | Insertion/426bp   |
| NODE_2224_1121     | 702                  | U            | 1700433          | Deletion/475bp    |
| NODE_2224_1121     | 702                  | U            | 2320101          | Deletion/462bp    |
| NODE_2224_1121     | 702                  | 2L           | 22544356         | Deletion/475bp    |
| NODE_937_2514      | 724                  | 2RHet        | 20653            | Deletion/438bp    |
| NODE_4295_805      | 580                  | 2RHet        | 3845             | Deletion/375bp    |
| NODE_4295_805      | 580                  | 2L           | 22574496         | Deletion/375bp    |
| NODE_4295_805      | 232                  | 3RHet        | 808296           | Deletion/391bp    |
| NODE_11987_641     | 419                  | 2R           | 14000545         | Deletion/407bp    |
| NODE_11987_641     | 224                  | 3L           | 23350254         | Deletion/407bp    |
| NODE_2749_1008     | 576                  | 2R           | 8601140          | Deletion/495bp    |
| NODE_2749_1008     | 439                  | 3R           | 194290           | Deletion/495bp    |
| NODE_2749_1008     | 439                  | 2R           | 8678610          | Deletion/495bp    |
| NODE_2749_1008     | 416                  | 3L           | 24007322         | Deletion/476bp    |
| NODE_343_5228      | 4405                 | U            | 1678935          | Deletion/483bp    |
| NODE_633_3773      | 3430                 | X            | 11643279         | Deletion/376bp    |
| NODE_633_3773      | 439                  | 3R           | 27716384         | Deletion/378bp    |
| NODE_2548_1049     | 435                  | X            | 21763683         | Deletion/382bp    |
| NODE_2548_1049     | 435                  | X            | 21771317         | Deletion/382bp    |
| NODE_1366_1737     | 648                  | X            | 135413           | Deletion/700bp    |
| NODE_4134_816      | 434                  | 2R           | 17703607         | Deletion/441bp    |
| NODE_554_4287      | 3317                 | U            | 280932           | Deletion/429bp    |
| NODE_554_4287      | 3428                 | X            | 22027109         | Deletion/418bp    |
| NODE_1694_1387     | 992                  | 2RHet        | 2937156          | Deletion/497bp    |
| NODE_1694_1387     | 994                  | 2R           | 14250884         | Deletion/497bp    |
| NODE_1694_1387     | 992                  | 3L           | 19842896         | Deletion/497bp    |
| NODE_3166_925      | 664                  | 2R           | 2221729          | Deletion/426bp    |
| NODE_3166_925      | 664                  | 2R           | 66164            | Deletion/426bp    |
| NODE_3166_925      | 664                  | 3LHet        | 2122945          | Deletion/426bp    |
| NODE_3166_925      | 266                  | 3R           | 5133228          | Deletion/426bp    |
| NODE_3166_925      | 266                  | 3R           | 22387052         | Deletion/426bp    |
| NODE_4856_772      | 422                  | 3RHet        | 1074533          | Deletion/476bp    |
| NODE_4856_772      | 422                  | 3RHet        | 1084644          | Deletion/480bp    |
| NODE_4856_772      | 355                  | X            | 21467764         | Deletion/481bp    |
| NODE_2974_956      | 374                  | 2RHet        | 542460           | Deletion/450bp    |
| NODE_2974_956      | 375                  | 3R           | 3929424          | Deletion/451bp    |
| NODE_2974_956      | 375                  | 2L           | 20217022         | Deletion/451bp    |
| NODE_3047_944      | 311                  | X            | 21764651         | Deletion/373bp    |
| NODE_3047_944      | 311                  | X            | 21772285         | Deletion/373bp    |
| NODE_3047_944      | 335                  | U            | 6200108          | Deletion/373bp    |
| NODE_3540_875      | 559                  | 3RHet        | 777415           | Deletion/416bp    |
| NODE_310_5442      | 1386                 | 3LHet        | 1763738          | Deletion/377bp    |
| NODE_68_7806       | 948                  | X            | 18852100         | Deletion/396bp    |
| NODE_68_7806       | 950                  | 3L           | 18766508         | Deletion/489bp    |
| NODE_383_5083      | 992                  | 3LHet        | 1769072          | Insertion/377bp   |
| NODE_257_6121      | 721                  | 3RHet        | 2274595          | Insertion/403bp   |
| NODE_219_6457      | 5246                 | 3LHet        | 342219           | Deletion/433bp    |
| NODE_280_5702      | 2184                 | U            | 2106367          | Deletion/602bp    |
| NODE_573_4157      | 359                  | 3LHet        | 798364           | Deletion/479bp    |
| NODE_289_5643      | 1997                 | 2LHet        | 354357           | Deletion/418bp    |
| NODE_4732_778      | 477                  | X            | 6326319          | Deletion/447bp    |
| NODE_4732_778      | 477                  | 2L           | 10140457         | Deletion/447bp    |
| NODE_4732_778      | 477                  | 3L           | 12914679         | Deletion/447bp    |
| NODE_4732_778      | 307                  | 3L           | 13570493         | Deletion/447bp    |
| NODE_4732_778      | 307                  | 3R           | 23617817         | Deletion/447bp    |
| NODE_893_2653      | 2002                 | U            | 665644           | Deletion/493bp    |
| NODE_893_2653      | 2002                 | 3L           | 13572103         | Deletion/493bp    |
| NODE_893_2653      | 707                  | X            | 6324714          | Deletion/493bp    |
| NODE_893_2653      | 718                  | 2L           | 10138863         | Deletion/493bp    |
| NODE_893_2653      | 723                  | 3R           | 1164826          | Deletion/493bp    |
| NODE_2053_1171     | 770                  | U            | 1147284          | Deletion/426bp    |
| NODE_2053_1171     | 770                  | 3LHet        | 2121337          | Deletion/420bp    |
| NODE_2053_1171     | 770                  | X            | 4724354          | Deletion/420bp    |
| NODE_2053_1171     | 413                  | 3R           | 22388665         | Deletion/420bp    |
| NODE_2053_1171     | 776                  | 2RHet        | 323040           | Deletion/420bp    |
| NODE_516_4564      | 2500                 | 3LHet        | 1841671          | Deletion/422bp    |
| NODE_2306_1103     | 594                  | U            | 280603           | Deletion/402bp    |
| NODE_256_6124      | 2152                 | 3RHet        | 1056790          | Deletion/384bp    |
| NODE_1723_1370     | 1106                 | 2R           | 20245182         | Deletion/385bp    |
| NODE_1723_1370     | 1106                 | 2R           | 21033391         | Deletion/379bp    |
| NODE_1723_1370     | 1106                 | 2L           | 21445294         | Deletion/385bp    |
| NODE_1723_1370     | 266                  | X            | 3391720          | Deletion/385bp    |
| NODE_1723_1370     | 266                  | 3L           | 18526335         | Deletion/385bp    |
| NODE_4398_798      | 530                  | 4            | 9723             | Deletion/398bp    |
| NODE_4398_798      | 272                  | 3RHet        | 1657727          | Deletion/398bp    |
| NODE_1140_2083     | 1183                 | 3RHet        | 2223261          | Deletion/461bp    |
| NODE_2241_1117     | 570                  | 3LHet        | 443303           | Deletion/405bp    |
| NODE_2241_1117     | 570                  | 3LHet        | 450742           | Deletion/406bp    |
| NODE_2241_1117     | 570                  | 2RHet        | 894580           | Deletion/405bp    |
| NODE_2241_1117     | 543                  | 2R           | 1174302          | Deletion/400bp    |
| NODE_2241_1117     | 570                  | 3RHet        | 1355338          | Deletion/405bp    |
| NODE_215_6483      | 3651                 | 2R           | 2264760          | Insertion/407bp   |
| NODE_112_7421      | 1893                 | U            | 1427390          | Deletion/479bp    |
| NODE_2026_1181     | 308                  | 3L           | 8015858          | Deletion/453bp    |
| NODE_1094_2191     | 1805                 | 3RHet        | 1796983          | Deletion/371bp    |
| NODE_424_4840      | 707                  | U            | 1199872          | Deletion/529bp    |
| NODE_424_4840      | 4259                 | X            | 21678035         | Deletion/529bp    |
| NODE_424_4840      | 4260                 | 3L           | 23912538         | Deletion/529bp    |
| NODE_1387_1720     | 810                  | 3L           | 18766795         | Deletion/403bp    |
| NODE_1271_1852     | 805                  | 2R           | 2257462          | Deletion/407bp    |

Table S55. Partial INDEL variation statistics of detection results generated by the *de novo* mode of LongRepMarker on the mouse dataset.

| Repeat fragment id | Location on fragment | Reference id | Location on Ref. | Variation/Length. |
|--------------------|----------------------|--------------|------------------|-------------------|
| NODE_1612_10359    | 7177                 | CM001014.2   | 2839743          | Deletion/513bp    |
| NODE_1612_10359    | 3281                 | CM001014.2   | 3296769          | Deletion/509bp    |
| NODE_1612_10359    | 7179                 | CM001014.2   | 3780992          | Deletion/469bp    |
| NODE_212_43740     | 35758                | GL456210.1   | 113792           | Deletion/498bp    |
| NODE_408_29557     | 28233                | KZ289081.1   | 147140           | Insertion/498bp   |
| NODE_1363_12001    | 10085                | CM000997.2   | 60526366         | Insertion/453bp   |
| NODE_1363_12001    | 10083                | CM000997.2   | 60765716         | Insertion/453bp   |
| NODE_6694_4510     | 4027                 | CM000995.2   | 176220701        | Deletion/483bp    |
| NODE_6694_4510     | 493                  | CM000995.2   | 176933206        | Deletion/483bp    |
| NODE_6694_4510     | 490                  | CM000995.2   | 177403768        | Deletion/483bp    |
| NODE_6694_4510     | 4026                 | CM000995.2   | 177753322        | Deletion/483bp    |
| NODE_1065_14600    | 12938                | CM000994.2   | 85599594         | Insertion/492bp   |
| NODE_630_21955     | 6645                 | GL456068.1   | 29708            | Deletion/782bp    |
| NODE_211_43800     | 37118                | CM000997.2   | 147654002        | Deletion/453bp    |
| NODE_7896_3664     | 2176                 | CM001005.2   | 22961142         | Deletion/494bp    |
| NODE_293_36608     | 2991                 | JH584328.1   | 417366           | Deletion/520bp    |
| NODE_293_36608     | 2991                 | JH584266.1   | 417477           | Deletion/520bp    |
| NODE_820_17868     | 5685                 | KQ030486.1   | 22319            | Deletion/454bp    |
| NODE_820_17868     | 12222                | GL456077.1   | 69596            | Deletion/454bp    |
| NODE_820_17868     | 5679                 | CM000997.2   | 60686584         | Deletion/453bp    |
| NODE_820_17868     | 5685                 | CM000997.2   | 61171930         | Deletion/454bp    |
| NODE_1394_11820    | 10654                | CM001001.2   | 71145707         | Deletion/563bp    |
| NODE_5613_5344     | 2708                 | CM001010.2   | 76040608         | Deletion/499bp    |
| NODE_357_32532     | 31953                | CM001006.2   | 120281172        | Deletion/498bp    |
| NODE_0_252066      | 165145               | GL456022.2   | 1250599          | Deletion/534bp    |
| NODE_225_42514     | 5810                 | CM001000.2   | 7330707          | Deletion/471bp    |
| NODE_10447_2486    | 760                  | CM001002.2   | 119221553        | Deletion/460bp    |
| NODE_5601_5351     | 4460                 | CM000995.2   | 177475324        | Deletion/504bp    |
| NODE_289_36862     | 9264                 | GL456022.2   | 1641517          | Insertion/551bp   |
| NODE_1458_11294    | 1597                 | CM000995.2   | 175212312        | Insertion/483bp   |
| NODE_1458_11294    | 9222                 | CM000995.2   | 175863876        | Insertion/483bp   |
| NODE_780_18602     | 1792                 | JH590470.1   | 779149           | Insertion/514bp   |
| NODE_780_18602     | 1794                 | CM001010.2   | 36824539         | Insertion/514bp   |
| NODE_1417_11624    | 5277                 | CM001000.2   | 7330707          | Deletion/471bp    |
| NODE_122_60184     | 22575                | GL456022.2   | 1017588          | Deletion/528bp    |
| NODE_122_60184     | 22575                | CM001010.2   | 34768809         | Deletion/528bp    |
| NODE_464_27081     | 26779                | CM001012.2   | 9640161          | Deletion/483bp    |
| NODE_3948_6574     | 3828                 | JH584324.1   | 2589865          | Deletion/471bp    |
| NODE_3948_6574     | 3827                 | CM000994.2   | 8193887          | Deletion/471bp    |
| NODE_3948_6574     | 3827                 | CM001001.2   | 90385973         | Deletion/471bp    |
| NODE_3948_6574     | 3828                 | CM000997.2   | 131225987        | Deletion/471bp    |
| NODE_2419_7854     | 914                  | CM001003.2   | 81684217         | Deletion/473bp    |
| NODE_2419_7854     | 914                  | CM001003.2   | 81843319         | Deletion/473bp    |
| NODE_1750_9646     | 4275                 | CM001013.2   | 170833612        | Insertion/796bp   |
| NODE_3385_7046     | 1492                 | CM001001.2   | 21304634         | Deletion/460bp    |
| NODE_313_35149     | 20394                | CM001005.2   | 23069048         | Insertion/572bp   |
| NODE_770_18860     | 10299                | CM000997.2   | 147391141        | Insertion/587bp   |
| NODE_649_21443     | 20663                | CM001013.2   | 5102273          | Deletion/558bp    |
| NODE_302_35903     | 4616                 | CM001014.2   | 17307496         | Deletion/608bp    |
| NODE_4884_6041     | 1320                 | JH584293.1   | 28699            | Deletion/467bp    |
| NODE_4884_6041     | 4901                 | CM000997.2   | 42146528         | Deletion/467bp    |
| NODE_4884_6041     | 4774                 | CM000997.2   | 42643739         | Deletion/467bp    |
| NODE_9504_2846     | 1128                 | CM001005.2   | 21016173         | Deletion/499bp    |
| NODE_9286_2926     | 508                  | CM001013.2   | 124364290        | Deletion/521bp    |
| NODE_9286_2926     | 508                  | CM001013.2   | 125562337        | Deletion/521bp    |
| NODE_9286_2926     | 510                  | CM001013.2   | 125299304        | Deletion/521bp    |
| NODE_3074_7130     | 2405                 | CM001002.2   | 8576268          | Deletion/466bp    |
| NODE_1162_13541    | 4229                 | KZ289068.1   | 113232           | Deletion/588bp    |
| NODE_1162_13541    | 4229                 | CM000997.2   | 146196060        | Deletion/588bp    |
| NODE_1162_13541    | 4210                 | CM000997.2   | 146718666        | Deletion/587bp    |
| NODE_1162_13541    | 4262                 | GL456053.2   | 123786           | Deletion/587bp    |
| NODE_10012_2638    | 1325                 | CM001007.2   | 3545620          | Deletion/585bp    |
| NODE_277_37824     | 2618                 | CM001000.2   | 14730687         | Deletion/572bp    |
| NODE_1790_9471     | 1929                 | GL456350.1   | 180728           | Insertion/467bp   |
| NODE_1790_9471     | 7117                 | CM000997.2   | 41935405         | Insertion/467bp   |
| NODE_1790_9471     | 7141                 | CM000997.2   | 42287518         | Insertion/467bp   |
| NODE_5808_5209     | 3213                 | KQ030486.1   | 22317            | Deletion/454bp    |
| NODE_5808_5209     | 2013                 | GL456077.1   | 69596            | Deletion/454bp    |
| NODE_5808_5209     | 3208                 | CM000997.2   | 60845802         | Deletion/454bp    |
| NODE_5808_5209     | 3216                 | CM000997.2   | 60686589         | Deletion/453bp    |
| NODE_2075_8718     | 5396                 | GL456019.1   | 1119971          | Insertion/499bp   |
| NODE_674_20781     | 6910                 | CM001001.2   | 3016402          | Deletion/493bp    |
| NODE_1264_12692    | 2994                 | CM000995.2   | 175212298        | Insertion/483bp   |
| NODE_1264_12692    | 9230                 | CM000995.2   | 175863872        | Insertion/483bp   |
| NODE_7667_3820     | 373                  | CM000994.2   | 173972552        | Deletion/467bp    |
| NODE_595_23059     | 18878                | CM000994.2   | 85599679         | Insertion/498bp   |
| NODE_1626_10282    | 7033                 | CM001005.2   | 19976628         | Deletion/504bp    |
| NODE_82_73090      | 6420                 | JH584315.1   | 23920            | Deletion/637bp    |
| NODE_121_60755     | 6195                 | CM001010.2   | 35619726         | Deletion/1035bp   |
| NODE_121_60755     | 48972                | CM001010.2   | 35662503         | Deletion/532bp    |
| NODE_11236_2248    | 1245                 | CM000995.2   | 176810116        | Deletion/672bp    |
| NODE_10343_2521    | 1438                 | CM001007.2   | 3545485          | Deletion/719bp    |
| NODE_2_240432      | 27098                | JH584328.1   | 1319159          | Insertion/534bp   |
| NODE_2_240432      | 27098                | JH584266.1   | 1319398          | Insertion/534bp   |
| NODE_1645_10153    | 5260                 | CM001000.2   | 17371414         | Deletion/479bp    |
| NODE_2699_7390     | 2743                 | CM001010.2   | 76040633         | Deletion/499bp    |
| NODE_496_25812     | 8978                 | CM000995.2   | 177274588        | Deletion/476bp    |
| NODE_594_23103     | 19132                | CM000995.2   | 175011309        | Insertion/476bp   |
| NODE_594_23103     | 5604                 | CM000995.2   | 177579255        | Insertion/476bp   |
| NODE_294_36585     | 4767                 | CM001001.2   | 20267480         | Insertion/582bp   |
| NODE_294_36585     | 4843                 | CM001001.2   | 20394754         | Insertion/581bp   |
| NODE_344_33196     | 25292                | GL456017.2   | 177521           | Insertion/782bp   |
| NODE_255_39288     | 28663                | GL456019.1   | 362268           | Insertion/455bp   |
| NODE_255_39288     | 28661                | CM001007.2   | 52708239         | Insertion/455bp   |
| NODE_205_44936     | 26635                | CM001005.2   | 23850327         | Deletion/572bp    |
| NODE_417_29104     | 23351                | CM001001.2   | 20120501         | Deletion/470bp    |
| NODE_782_18572     | 7363                 | JH584266.1   | 637119           | Deletion/452bp    |
| NODE_7972_3610     | 2458                 | GL456350.1   | 182638           | Insertion/498bp   |
| NODE_7972_3610     | 656                  | CM000997.2   | 41933300         | Insertion/498bp   |
| NODE_7972_3610     | 656                  | CM000997.2   | 42144581         | Insertion/498bp   |
| NODE_7972_3610     | 3112                 | CM000997.2   | 42147037         | Deletion/467bp    |
| NODE_7972_3610     | 656                  | CM000997.2   | 42285531         | Insertion/498bp   |
| NODE_5522_5411     | 5193                 | CM000997.2   | 42146552         | Deletion/467bp    |
| NODE_5522_5411     | 5182                 | CM000997.2   | 42643879         | Deletion/467bp    |
| NODE_5522_5411     | 261                  | JH584293.1   | 28700            | Deletion/467bp    |
| NODE_12230_1994    | 924                  | CM001014.2   | 41248569         | Deletion/474bp    |
| NODE_327_34436     | 747                  | KZ289080.1   | 162122           | Deletion/656bp    |
| NODE_862_17118     | 5518                 | CM001000.2   | 7330707          | Deletion/471bp    |
| NODE_14912_1563    | 445                  | JH584318.1   | 140602           | Deletion/450bp    |
| NODE_1054_14728    | 14359                | CM001005.2   | 20584858         | Deletion/730bp    |
| NODE_425_28748     | 698                  | GL456022.2   | 1641157          | Insertion/604bp   |
| NODE_55_89804      | 22517                | CM000997.2   | 60526381         | Insertion/454bp   |
| NODE_55_89804      | 22508                | CM000997.2   | 60765735         | Insertion/454bp   |
| NODE_6041_5023     | 307                  | CM001010.2   | 76040607         | Deletion/499bp    |
| NODE_851_17276     | 5247                 | CM001005.2   | 23069036         | Insertion/552bp   |
| NODE_10725_2392    | 879                  | CM001014.2   | 41248560         | Deletion/483bp    |
| NODE_675_20780     | 6930                 | CM001001.2   | 3016403          | Deletion/493bp    |
| NODE_240_40967     | 11633                | CM001000.2   | 7330740          | Deletion/471bp    |
| NODE_91_68995      | 40124                | JH584328.1   | 1087366          | Insertion/528bp   |
| NODE_91_68995      | 40119                | JH584266.1   | 1087613          | Insertion/528bp   |
| NODE_110_63963     | 63610                | CM001004.2   | 82998283         | Deletion/594bp    |
| NODE_110_63963     | 64235                | KZ289075.1   | 63909            | Deletion/594bp    |
| NODE_1548_10679    | 606                  | CM001007.2   | 4296669          | Deletion/581bp    |
| NODE_1548_10679    | 10093                | CM001007.2   | 6146167          | Deletion/586bp    |
| NODE_1548_10679    | 1022                 | CM001007.2   | 6918779          | Insertion/496bp   |
| NODE_258_39166     | 28661                | CM001007.2   | 53414908         | Deletion/455bp    |
| NODE_6115_4953     | 779                  | GL456350.1   | 182617           | Insertion/498bp   |
| NODE_6115_4953     | 3767                 | CM000997.2   | 41933322         | Insertion/498bp   |
| NODE_6115_4953     | 3911                 | CM000997.2   | 42285555         | Insertion/498bp   |
| NODE_6115_4953     | 3744                 | CM000997.2   | 42641775         | Insertion/498bp   |
| NODE_665_21072     | 18818                | CM000994.2   | 85599639         | Insertion/498bp   |
| NODE_5347_5543     | 579                  | CM001011.2   | 6346958          | Deletion/500bp    |
| NODE_5347_5543     | 575                  | CM000995.2   | 25719536         | Deletion/474bp    |
| NODE_5347_5543     | 578                  | CM001000.2   | 42515603         | Deletion/510bp    |
| NODE_5347_5543     | 571                  | CM001006.2   | 77636047         | Deletion/506bp    |
| NODE_2685_7408     | 2696                 | CM001010.2   | 76040604         | Deletion/499bp    |
| NODE_2147_8550     | 7888                 | GL456019.1   | 580641           | Deletion/515bp    |
| NODE_2776_7305     | 2710                 | CM001010.2   | 76040619         | Deletion/499bp    |
| NODE_544_24263     | 4318                 | CM000995.2   | 175212309        | Insertion/483bp   |
| NODE_544_24263     | 19537                | CM000995.2   | 175864564        | Insertion/483bp   |
| NODE_777_18682     | 1805                 | CM001006.2   | 65803978         | Deletion/504bp    |
| NODE_777_18682     | 16725                | CM001006.2   | 66121810         | Deletion/588bp    |

Table S56. Partial INDEL variation statistics of detection results generated by the *de novo* mode of LongRepMarker on the HG003\_NA24149\_father dataset.

| Repeat fragment id | Location on fragment | Reference id        | Location on Ref. | Variation/Length. |
|--------------------|----------------------|---------------------|------------------|-------------------|
| NODE_77.Length     | 341                  | chr3                | 195589799        | Insertion/50bp    |
| NODE_16.Length     | 2127                 | chr22               | 18205220         | Deletion/189bp    |
| NODE_29.Length     | 1521                 | chr4                | 49710771         | Deletion/202bp    |
| NODE_29.Length     | 373                  | chrUn_KI270333v1    | 702              | Deletion/235bp    |
| NODE_29.Length     | 1591                 | chrUn_KI270333v1    | 1920             | Deletion/124bp    |
| NODE_29.Length     | 860                  | chrUn_KI270333v1    | 653              | Insertion/80bp    |
| NODE_287.Length    | 323                  | chrY                | 10927895         | Deletion/70bp     |
| NODE_339.Length    | 277                  | chr5                | 175498939        | Deletion/50bp     |
| NODE_840.Length    | 404                  | chr5                | 49601788         | Deletion/60bp     |
| NODE_64.Length     | 675                  | chr4                | 49101938         | Deletion/70bp     |
| NODE_64.Length     | 696                  | chr4                | 49107712         | Deletion/84bp     |
| NODE_64.Length     | 676                  | chr4                | 49109130         | Deletion/70bp     |
| NODE_126.Length    | 272                  | chr22               | 11946235         | Deletion/124bp    |
| NODE_126.Length    | 261                  | chr3                | 75760593         | Deletion/62bp     |
| NODE_88.Length     | 596                  | chrY                | 10748856         | Deletion/55bp     |
| NODE_88.Length     | 167                  | chr16               | 34097217         | Deletion/53bp     |
| NODE_53.Length     | 854                  | chrUn_KI270333v1    | 983              | Deletion/159bp    |
| NODE_53.Length     | 355                  | chr4                | 49710796         | Deletion/159bp    |
| NODE_53.Length     | 431                  | chrUn_KI270333v1    | 760              | Deletion/112bp    |
| NODE_53.Length     | 900                  | chrUn_KI270333v1    | 1229             | Deletion/83bp     |
| NODE_53.Length     | 983                  | chr4                | 49711180         | Deletion/84bp     |
| NODE_53.Length     | 1104                 | chr4                | 49711301         | Deletion/84bp     |
| NODE_53.Length     | 357                  | chr4                | 49710019         | Deletion/83bp     |
| NODE_53.Length     | 823                  | chr4                | 49709863         | Deletion/158bp    |
| NODE_53.Length     | 1314                 | chr4                | 49710354         | Deletion/203bp    |
| NODE_401.Length    | 369                  | chrY                | 10755401         | Deletion/50bp     |
| NODE_99.Length     | 821                  | chrY                | 10846827         | Deletion/84bp     |
| NODE_356.Length    | 208                  | chrY                | 10926537         | Insertion/54bp    |
| NODE_747.Length    | 223                  | chrUn_KI270757v1    | 14572            | Deletion/57bp     |
| NODE_684.Length    | 279                  | chr5                | 49657241         | Deletion/65bp     |
| NODE_684.Length    | 286                  | chr5                | 49660385         | Deletion/70bp     |
| NODE_467.Length    | 345                  | chr5                | 49602549         | Deletion/71bp     |
| NODE_907.Length    | 372                  | chr20               | 31063965         | Deletion/50bp     |
| NODE_52.Length     | 502                  | chr18               | 110704           | Deletion/68bp     |
| NODE_52.Length     | 720                  | chr18               | 110922           | Deletion/68bp     |
| NODE_686.Length    | 347                  | chr9                | 41229817         | Deletion/51bp     |
| NODE_686.Length    | 271                  | chrUn_KI270442v1    | 391775           | Deletion/50bp     |
| NODE_86.Length     | 172                  | chr4                | 49120897         | Insertion/100bp   |
| NODE_758.Length    | 155                  | chr10               | 41860219         | Deletion/55bp     |
| NODE_368.Length    | 232                  | chr4                | 49711416         | Deletion/84bp     |
| NODE_368.Length    | 289                  | chr4                | 49710768         | Deletion/202bp    |
| NODE_368.Length    | 307                  | chrUn_KI270333v1    | 716              | Deletion/152bp    |
| NODE_368.Length    | 598                  | chrUn_KI270333v1    | 1007             | Deletion/76bp     |
| NODE_368.Length    | 170                  | chrUn_KI270333v1    | 1150             | Deletion/167bp    |
| NODE_368.Length    | 255                  | chr4                | 49709585         | Deletion/160bp    |
| NODE_368.Length    | 467                  | chr4                | 49709797         | Deletion/74bp     |
| NODE_778.Length    | 334                  | chrUn_KI270591v1    | 5290             | Insertion/50bp    |
| NODE_734.Length    | 268                  | chr12               | 126327075        | Deletion/201bp    |
| NODE_504.Length    | 173                  | chrY                | 10963389         | Deletion/124bp    |
| NODE_315.Length    | 286                  | chr4                | 49102087         | Deletion/55bp     |
| NODE_314.Length    | 298                  | chr17               | 21856473         | Deletion/130bp    |
| NODE_987.Length    | 275                  | chr4                | 49709544         | Deletion/83bp     |
| NODE_85.Length     | 434                  | chr1                | 25631827         | Deletion/251bp    |
| NODE_85.Length     | 328                  | chr3                | 95325563         | Insertion/57bp    |
| NODE_823.Length    | 249                  | chr5                | 49601674         | Deletion/141bp    |
| NODE_295.Length    | 347                  | chr5                | 49658415         | Deletion/65bp     |
| NODE_295.Length    | 353                  | chr5                | 49602289         | Deletion/90bp     |
| NODE_17.Length     | 1665                 | chrUn_GL000220v1    | 128360           | Deletion/112bp    |
| NODE_17.Length     | 1667                 | chr21               | 8229758          | Deletion/112bp    |
| NODE_17.Length     | 1871                 | chr21               | 8416985          | Insertion/196bp   |
| NODE_254.Length    | 471                  | chr4                | 49635424         | Deletion/50bp     |
| NODE_179.Length    | 456                  | chr1                | 144328486        | Deletion/227bp    |
| NODE_179.Length    | 765                  | chr1                | 144328795        | Deletion/88bp     |
| NODE_179.Length    | 463                  | chr1_KI270765v1_alt | 148271           | Deletion/101bp    |
| NODE_179.Length    | 868                  | chr1_KI270765v1_alt | 148676           | Deletion/62bp     |
| NODE_179.Length    | 229                  | chr1                | 143502774        | Deletion/62bp     |
| NODE_179.Length    | 579                  | chr1                | 143503118        | Deletion/111bp    |
| NODE_179.Length    | 782                  | chr1                | 143503327        | Deletion/74bp     |
| NODE_179.Length    | 462                  | chr1                | 144637772        | Deletion/227bp    |
| NODE_232.Length    | 260                  | chr9                | 61992880         | Deletion/58bp     |
| NODE_45.Length     | 998                  | chr4                | 51471879         | Deletion/343bp    |
| NODE_45.Length     | 1000                 | chr4                | 51523251         | Deletion/343bp    |
| NODE_45.Length     | 917                  | chr4                | 50822193         | Insertion/167bp   |
| NODE_926.Length    | 302                  | chrY                | 10769340         | Deletion/74bp     |
| NODE_926.Length    | 415                  | chrY                | 11039571         | Deletion/75bp     |
| NODE_754.Length    | 187                  | chr7                | 150003517        | Deletion/54bp     |
| NODE_10.Length     | 120                  | chr4                | 49709969         | Insertion/126bp   |
| NODE_10.Length     | 740                  | chr4                | 49710589         | Insertion/84bp    |
| NODE_10.Length     | 835                  | chrUn_KI270467v1    | 1519             | Insertion/167bp   |
| NODE_10.Length     | 1177                 | chrUn_KI270467v1    | 1861             | Insertion/114bp   |
| NODE_10.Length     | 1547                 | chrUn_KI270467v1    | 2231             | Insertion/84bp    |
| NODE_10.Length     | 2455                 | chrUn_KI270467v1    | 3139             | Deletion/122bp    |
| NODE_646.Length    | 313                  | chr1                | 4144694          | Deletion/50bp     |
| NODE_11.Length     | 1679                 | chr20               | 31061873         | Insertion/95bp    |
| NODE_418.Length    | 340                  | chr5                | 49601737         | Deletion/59bp     |
| NODE_21.Length     | 569                  | chr10               | 133687907        | Deletion/139bp    |
| NODE_21.Length     | 1819                 | chr10               | 133689157        | Deletion/67bp     |
| NODE_21.Length     | 2044                 | chr10               | 133689382        | Deletion/68bp     |
| NODE_21.Length     | 569                  | chr4                | 190178019        | Deletion/139bp    |
| NODE_21.Length     | 1819                 | chr4                | 190179269        | Deletion/67bp     |
| NODE_21.Length     | 2025                 | chr4                | 190179475        | Deletion/68bp     |
| NODE_21.Length     | 355                  | chr18               | 108442           | Insertion/67bp    |
| NODE_21.Length     | 1378                 | chr18               | 109465           | Deletion/206bp    |
| NODE_971.Length    | 489                  | chrY                | 10850620         | Insertion/50bp    |
| NODE_24.Length     | 234                  | chr21               | 8203053          | Deletion/146bp    |
| NODE_24.Length     | 234                  | chr21               | 8386100          | Deletion/146bp    |
| NODE_24.Length     | 218                  | chr21               | 8430485          | Insertion/95bp    |
| NODE_293.Length    | 394                  | chr4                | 49709516         | Deletion/84bp     |
| NODE_293.Length    | 130                  | chrUn_KI270333v1    | 1070             | Deletion/77bp     |
| NODE_293.Length    | 308                  | chr4                | 49711411         | Deletion/126bp    |
| NODE_14.Length     | 1667                 | chr17               | 26603196         | Insertion/335bp   |
| NODE_14.Length     | 1771                 | chr17               | 26620595         | Insertion/336bp   |
| NODE_609.Length    | 358                  | chrY                | 10808498         | Deletion/74bp     |
| NODE_269.Length    | 462                  | chr10               | 41860068         | Deletion/50bp     |
| NODE_269.Length    | 272                  | chr4                | 49098615         | Deletion/85bp     |
| NODE_508.Length    | 418                  | chr5                | 49658637         | Insertion/52bp    |
| NODE_219.Length    | 500                  | chr4                | 49710269         | Deletion/113bp    |
| NODE_219.Length    | 341                  | chrUn_KI270333v1    | 325              | Deletion/84bp     |
| NODE_819.Length    | 255                  | chr10               | 41895444         | Deletion/53bp     |
| NODE_264.Length    | 414                  | chrY                | 56829353         | Deletion/80bp     |

Table S57. Partial INDEL variation statistics of detection results generated by the *de novo* mode of LongRepMarker on the human-chr14 dataset.

| Repeat fragment id | Location on fragment | Reference id | Location on Ref. | Variation/Length. |
|--------------------|----------------------|--------------|------------------|-------------------|
| NODE_132.Length    | 319                  | gi           | 19553531         | Deletion/111bp    |
| NODE_132.Length    | 506                  | gi           | 20019960         | Deletion/111bp    |
| NODE_314.Length    | 306                  | gi           | 65994298         | Insertion/54bp    |
| NODE_314.Length    | 106                  | gi           | 22818416         | Insertion/54bp    |
| NODE_314.Length    | 151                  | gi           | 52675979         | Insertion/54bp    |
| NODE_77.Length     | 849                  | gi           | 105326375        | Deletion/154bp    |
| NODE_77.Length     | 1120                 | gi           | 105326646        | Deletion/180bp    |
| NODE_23.Length     | 488                  | gi           | 106159686        | Deletion/185bp    |
| NODE_168.Length    | 394                  | gi           | 70663237         | Insertion/55bp    |
| NODE_317.Length    | 92                   | gi           | 98143931         | Insertion/55bp    |
| NODE_281.Length    | 331                  | gi           | 49529917         | Insertion/56bp    |
| NODE_131.Length    | 404                  | gi           | 38734571         | Insertion/58bp    |
| NODE_6484.Length   | 44                   | gi           | 102846348        | Deletion/51bp     |
| NODE_6484.Length   | 44                   | gi           | 102846450        | Deletion/51bp     |
| NODE_7966.Length   | 34                   | gi           | 102845867        | Deletion/51bp     |
| NODE_126.Length    | 707                  | gi           | 106084159        | Deletion/56bp     |
| NODE_7820.Length   | 34                   | gi           | 104791218        | Deletion/86bp     |
| NODE_354.Length    | 371                  | gi           | 97235304         | Deletion/78bp     |
| NODE_9819.Length   | 32                   | gi           | 52996244         | Deletion/50bp     |
| NODE_9819.Length   | 32                   | gi           | 52996369         | Deletion/50bp     |
| NODE_575.Length    | 148                  | gi           | 82144846         | Deletion/101bp    |
| NODE_286.Length    | 356                  | gi           | 22819081         | Insertion/55bp    |
| NODE_9085.Length   | 28                   | gi           | 101711567        | Deletion/90bp     |
| NODE_123.Length    | 642                  | gi           | 94986010         | Insertion/51bp    |
| NODE_147.Length    | 363                  | gi           | 95117490         | Insertion/150bp   |

Table S58. Partial INDEL variation statistics of detection results generated by the *de novo* mode of LongRepMarker on the HG002\_NA24385\_Son dataset.

| Repeat fragment id | Location on fragment | Reference id     | Location on Ref. | Variation/Length. |
|--------------------|----------------------|------------------|------------------|-------------------|
| NODE_286.Length    | 365                  | chr4             | 49633966         | Deletion/60bp     |
| NODE_286.Length    | 180                  | chr4             | 49112996         | Deletion/75bp     |
| NODE_286.Length    | 201                  | chr4             | 49111178         | Deletion/60bp     |
| NODE_694.Length    | 442                  | chr4             | 49154943         | Deletion/70bp     |
| NODE_262.Length    | 433                  | chr10            | 41879151         | Deletion/60bp     |
| NODE_147.Length    | 358                  | chrUn_K1270333v1 | 1639             | Insertion/84bp    |
| NODE_147.Length    | 469                  | chr4             | 49710761         | Deletion/83bp     |
| NODE_147.Length    | 293                  | chrUn_K1270337v1 | 308              | Deletion/160bp    |
| NODE_147.Length    | 587                  | chrUn_K1270337v1 | 602              | Deletion/84bp     |
| NODE_147.Length    | 42                   | chr4             | 49711116         | Deletion/249bp    |
| NODE_759.Length    | 272                  | chr4             | 49139241         | Deletion/60bp     |
| NODE_759.Length    | 261                  | chr4             | 49141694         | Deletion/60bp     |
| NODE_759.Length    | 300                  | chr4             | 49125891         | Deletion/70bp     |
| NODE_759.Length    | 291                  | chr4             | 49148761         | Deletion/90bp     |
| NODE_350.Length    | 259                  | chrUn_K1270337v1 | 304              | Deletion/244bp    |
| NODE_630.Length    | 212                  | chrY             | 11326315         | Insertion/69bp    |
| NODE_891.Length    | 251                  | chr7             | 51672065         | Deletion/125bp    |
| NODE_466.Length    | 222                  | chr10            | 132821261        | Deletion/50bp     |
| NODE_527.Length    | 298                  | chr9             | 86053399         | Deletion/67bp     |
| NODE_481.Length    | 125                  | chr6             | 43294135         | Deletion/66bp     |
| NODE_19.Length     | 1173                 | chr4             | 50562717         | Insertion/169bp   |
| NODE_19.Length     | 1173                 | chr4             | 50882017         | Insertion/169bp   |
| NODE_157.Length    | 363                  | chr14            | 24546480         | Deletion/117bp    |
| NODE_970.Length    | 199                  | chrUn_K1270333v1 | 1237             | Deletion/83bp     |
| NODE_624.Length    | 309                  | chr5             | 49658586         | Deletion/55bp     |
| NODE_12.Length     | 2195                 | chr22            | 18205216         | Deletion/189bp    |
| NODE_12.Length     | 1211                 | chr21            | 10271377         | Insertion/354bp   |
| NODE_131.Length    | 442                  | chrY             | 10940944         | Insertion/76bp    |
| NODE_131.Length    | 378                  | chr20            | 28889936         | Deletion/55bp     |
| NODE_131.Length    | 345                  | chrY             | 56830684         | Deletion/79bp     |
| NODE_490.Length    | 235                  | chrUn_K1270438v1 | 104554           | Deletion/65bp     |
| NODE_173.Length    | 326                  | chrUn_K1270438v1 | 46973            | Insertion/50bp    |
| NODE_127.Length    | 270                  | chrUn_K1270336v1 | 333              | Deletion/210bp    |
| NODE_717.Length    | 177                  | chr4             | 49710820         | Deletion/113bp    |
| NODE_717.Length    | 198                  | chrUn_K1270333v1 | 477              | Deletion/82bp     |
| NODE_14.Length     | 1496                 | chrUn_GL000216v2 | 156218           | Insertion/205bp   |
| NODE_14.Length     | 772                  | chrUn_GL000216v2 | 152829           | Insertion/68bp    |
| NODE_14.Length     | 1491                 | chrUn_GL000216v2 | 153548           | Insertion/206bp   |
| NODE_14.Length     | 795                  | chrY             | 11326153         | Insertion/67bp    |
| NODE_14.Length     | 995                  | chrY             | 11326353         | Insertion/69bp    |
| NODE_14.Length     | 1496                 | chrY             | 11326854         | Insertion/206bp   |
| NODE_902.Length    | 318                  | chr4             | 49137001         | Deletion/80bp     |
| NODE_902.Length    | 328                  | chr4             | 49122646         | Deletion/80bp     |
| NODE_902.Length    | 328                  | chr4             | 49129942         | Deletion/70bp     |
| NODE_902.Length    | 342                  | chr4             | 49148445         | Deletion/50bp     |
| NODE_124.Length    | 253                  | chr4             | 49709500         | Deletion/74bp     |
| NODE_418.Length    | 184                  | chr8             | 85654334         | Deletion/110bp    |
| NODE_418.Length    | 253                  | chr8             | 85737507         | Deletion/110bp    |
| NODE_418.Length    | 184                  | chr8             | 85744190         | Deletion/110bp    |
| NODE_418.Length    | 184                  | chr8             | 85790026         | Deletion/110bp    |
| NODE_418.Length    | 184                  | chr8             | 85802219         | Deletion/110bp    |
| NODE_418.Length    | 184                  | chr8             | 85814413         | Deletion/110bp    |
| NODE_45.Length     | 488                  | chr21            | 8247409          | Insertion/95bp    |
| NODE_45.Length     | 488                  | chr21            | 8430433          | Insertion/95bp    |
| NODE_102.Length    | 250                  | chr4             | 49710010         | Deletion/83bp     |
| NODE_102.Length    | 228                  | chrUn_K1270337v1 | 246              | Insertion/126bp   |
| NODE_261.Length    | 223                  | chr4             | 49137778         | Deletion/50bp     |
| NODE_733.Length    | 146                  | chr4             | 49124434         | Deletion/50bp     |
| NODE_268.Length    | 444                  | chr16            | 88054227         | Deletion/51bp     |
| NODE_439.Length    | 214                  | chr4             | 49710491         | Deletion/84bp     |
| NODE_439.Length    | 322                  | chrUn_K1270333v1 | 2300             | Deletion/84bp     |
| NODE_185.Length    | 370                  | chr4             | 49711112         | Deletion/167bp    |
| NODE_185.Length    | 263                  | chrUn_K1270333v1 | 1330             | Deletion/125bp    |
| NODE_185.Length    | 307                  | chr4             | 49710755         | Deletion/83bp     |
| NODE_44.Length     | 353                  | chr11            | 67619502         | Deletion/121bp    |
| NODE_44.Length     | 544                  | chr12            | 131228468        | Deletion/236bp    |
| NODE_44.Length     | 784                  | chr19            | 11941038         | Deletion/160bp    |
| NODE_44.Length     | 198                  | chr4             | 76042714         | Insertion/102bp   |
| NODE_765.Length    | 272                  | chrUn_K1270333v1 | 1517             | Deletion/84bp     |
| NODE_42.Length     | 739                  | chr20            | 31074197         | Insertion/145bp   |
| NODE_540.Length    | 319                  | chr5             | 49602310         | Deletion/55bp     |
| NODE_47.Length     | 406                  | chr22            | 45555989         | Deletion/322bp    |

Table S59. Partial INDEL variation statistics of detection results generated by the *de novo* mode of LongRepMarker on the ant dataset.

| Repeat fragment id | Location on fragment | Reference id | Location on Ref. | Variation/Length. |
|--------------------|----------------------|--------------|------------------|-------------------|
| NODE_14.Length     | 3988                 | GL888247.1   | 235428           | Insertion/143bp   |
| NODE_14.Length     | 5551                 | GL888247.1   | 236991           | Insertion/87bp    |
| NODE_14.Length     | 5910                 | GL888247.1   | 237350           | Insertion/175bp   |
| NODE_14.Length     | 6700                 | GL888247.1   | 238140           | Insertion/120bp   |
| NODE_14.Length     | 1735                 | GL888385.1   | 39189            | Insertion/291bp   |
| NODE_14.Length     | 2075                 | GL888385.1   | 39529            | Insertion/120bp   |
| NODE_14.Length     | 5658                 | GL888385.1   | 43112            | Deletion/134bp    |
| NODE_14.Length     | 8227                 | GL888385.1   | 45681            | Insertion/111bp   |
| NODE_18.Length     | 445                  | GL888180.1   | 85614            | Insertion/283bp   |
| NODE_55.Length     | 626                  | GL888374.1   | 138919           | Deletion/113bp    |
| NODE_55.Length     | 1724                 | GL888374.1   | 140017           | Insertion/75bp    |
| NODE_55.Length     | 891                  | GL888828.1   | 2511334          | Insertion/329bp   |
| NODE_55.Length     | 1852                 | GL888828.1   | 2512295          | Insertion/75bp    |
| NODE_11.Length     | 2808                 | GL888090.1   | 212105           | Insertion/212bp   |
| NODE_35.Length     | 8294                 | GL888302.1   | 14449            | Insertion/178bp   |
| NODE_6291.Length   | 39                   | GL888360.1   | 22031            | Deletion/124bp    |
| NODE_39.Length     | 1500                 | GL888643.1   | 103932           | Deletion/141bp    |
| NODE_39.Length     | 2013                 | GL888643.1   | 104445           | Insertion/88bp    |
| NODE_38.Length     | 249                  | GL888359.1   | 100821           | Deletion/271bp    |
| NODE_8500.Length   | 27                   | GL888567.1   | 653              | Deletion/114bp    |
| NODE_44.Length     | 4440                 | GL888543.1   | 2838             | Deletion/118bp    |
| NODE_44.Length     | 3904                 | GL888283.1   | 37678            | Insertion/71bp    |
| NODE_1590.Length   | 26                   | GL887634.1   | 252976           | Deletion/60bp     |
| NODE_56.Length     | 8858                 | GL887834.1   | 165540           | Deletion/412bp    |
| NODE_56.Length     | 4382                 | GL887834.1   | 153182           | Deletion/86bp     |
| NODE_56.Length     | 4878                 | GL887834.1   | 153678           | Insertion/211bp   |
| NODE_56.Length     | 5814                 | GL887834.1   | 154614           | Insertion/158bp   |
| NODE_26.Length     | 2184                 | GL888775.1   | 95977            | Deletion/354bp    |
| NODE_57.Length     | 1316                 | GL887554.1   | 9378             | Deletion/182bp    |
| NODE_57.Length     | 1464                 | GL887793.1   | 97633            | Deletion/266bp    |
| NODE_57.Length     | 747                  | GL888539.1   | 112569           | Deletion/235bp    |
| NODE_57.Length     | 506                  | GL887917.1   | 515366           | Insertion/91bp    |
| NODE_57.Length     | 750                  | GL887917.1   | 515610           | Deletion/176bp    |
| NODE_57.Length     | 1096                 | GL887917.1   | 515956           | Insertion/59bp    |
| NODE_57.Length     | 610                  | GL888645.1   | 194067           | Insertion/119bp   |
| NODE_49.Length     | 899                  | GL888447.1   | 11975            | Insertion/72bp    |
| NODE_1694.Length   | 16                   | GL888608.1   | 731051           | Deletion/63bp     |
| NODE_50.Length     | 2367                 | GL888594.1   | 9495             | Insertion/205bp   |
| NODE_42.Length     | 824                  | GL887828.1   | 5706             | Deletion/139bp    |
| NODE_42.Length     | 538                  | GL888254.1   | 139671           | Deletion/212bp    |
| NODE_42.Length     | 581                  | GL888191.1   | 200522           | Insertion/380bp   |
| NODE_43.Length     | 408                  | GL887862.1   | 16535            | Deletion/241bp    |
| NODE_8588.Length   | 35                   | GL887601.1   | 533              | Deletion/115bp    |
| NODE_46.Length     | 242                  | GL888482.1   | 28738            | Deletion/93bp     |
| NODE_46.Length     | 2699                 | GL888409.1   | 172460           | Insertion/192bp   |
| NODE_24.Length     | 267                  | GL888528.1   | 4369             | Deletion/142bp    |
| NODE_24.Length     | 2233                 | GL888528.1   | 6335             | Deletion/65bp     |



Table S60. Partial INDEL variation statistics of detection results generated by the *de novo* mode of LongRepMarker on the HG004\_NA24143\_mother dataset.

| Repeat fragment id | Location on fragment | Reference id        | Location on Ref. | Variation/Length. |
|--------------------|----------------------|---------------------|------------------|-------------------|
| NODE_555.Length    | 319                  | chr4                | 49144271         | Deletion/75bp     |
| NODE_50.Length     | 775                  | chrUn_K1270333v1    | 1786             | Deletion/84bp     |
| NODE_50.Length     | 938                  | chrUn_K1270333v1    | 1949             | Deletion/201bp    |
| NODE_50.Length     | 598                  | chr4                | 49709833         | Deletion/158bp    |
| NODE_50.Length     | 319                  | chr4                | 49710134         | Deletion/83bp     |
| NODE_50.Length     | 665                  | chr4                | 49711049         | Deletion/83bp     |
| NODE_50.Length     | 1234                 | chr4                | 49711618         | Deletion/76bp     |
| NODE_50.Length     | 701                  | chrUn_K1270333v1    | 1015             | Deletion/76bp     |
| NODE_50.Length     | 840                  | chrUn_K1270337v1    | 787              | Insertion/253bp   |
| NODE_188.Length    | 398                  | chr4                | 9574460          | Insertion/69bp    |
| NODE_161.Length    | 559                  | chr16               | 34097247         | Deletion/55bp     |
| NODE_12.Length     | 1507                 | chr17               | 26620589         | Insertion/336bp   |
| NODE_354.Length    | 301                  | chr1                | 144103736        | Deletion/173bp    |
| NODE_326.Length    | 100                  | chr21               | 5328592          | Deletion/70bp     |
| NODE_798.Length    | 59                   | chr8                | 43241326         | Deletion/83bp     |
| NODE_798.Length    | 294                  | chr22               | 11215073         | Deletion/132bp    |
| NODE_290.Length    | 338                  | chrUn_K1270756v1    | 873              | Deletion/71bp     |
| NODE_290.Length    | 256                  | chr16               | 34097939         | Deletion/51bp     |
| NODE_290.Length    | 396                  | chr16               | 34098079         | Deletion/75bp     |
| NODE_639.Length    | 43                   | chr4                | 49709799         | Deletion/75bp     |
| NODE_17.Length     | 906                  | chr4                | 190179261        | Deletion/67bp     |
| NODE_17.Length     | 1128                 | chr4                | 190179483        | Deletion/67bp     |
| NODE_17.Length     | 906                  | chr10               | 133689149        | Deletion/67bp     |
| NODE_17.Length     | 1128                 | chr10               | 133689371        | Deletion/67bp     |
| NODE_17.Length     | 1439                 | chr18               | 108453           | Insertion/67bp    |
| NODE_864.Length    | 221                  | chrY                | 11026376         | Deletion/52bp     |
| NODE_367.Length    | 310                  | chrUn_K1270333v1    | 328              | Deletion/117bp    |
| NODE_367.Length    | 335                  | chr4                | 49710793         | Deletion/75bp     |
| NODE_156.Length    | 566                  | chr22               | 35601933         | Deletion/175bp    |
| NODE_680.Length    | 275                  | chrUn_K1270467v1    | 2230             | Deletion/122bp    |
| NODE_116.Length    | 771                  | chrY                | 56834194         | Deletion/58bp     |
| NODE_495.Length    | 310                  | chr17               | 21971431         | Deletion/140bp    |
| NODE_495.Length    | 310                  | chr17               | 21974588         | Deletion/140bp    |
| NODE_106.Length    | 305                  | chrY                | 56856795         | Insertion/60bp    |
| NODE_672.Length    | 210                  | chr9                | 134599487        | Deletion/55bp     |
| NODE_325.Length    | 106                  | chrUn_K1270467v1    | 880              | Deletion/125bp    |
| NODE_325.Length    | 583                  | chrUn_K1270466v1    | 921              | Deletion/84bp     |
| NODE_585.Length    | 103                  | chr9                | 137327857        | Deletion/93bp     |
| NODE_60.Length     | 1037                 | chr4                | 49710350         | Deletion/74bp     |
| NODE_60.Length     | 262                  | chrUn_K1270333v1    | 244              | Deletion/77bp     |
| NODE_60.Length     | 799                  | chrUn_K1270333v1    | 781              | Deletion/116bp    |
| NODE_60.Length     | 1052                 | chrUn_K1270333v1    | 1034             | Deletion/75bp     |
| NODE_13.Length     | 989                  | chr4                | 49710329         | Deletion/74bp     |
| NODE_13.Length     | 304                  | chrUn_K1270467v1    | 946              | Insertion/84bp    |
| NODE_13.Length     | 1126                 | chrUn_K1270467v1    | 1768             | Insertion/72bp    |
| NODE_13.Length     | 1454                 | chrUn_K1270467v1    | 2096             | Insertion/84bp    |
| NODE_13.Length     | 2701                 | chrUn_K1270467v1    | 3343             | Deletion/124bp    |
| NODE_13.Length     | 3222                 | chrUn_K1270466v1    | 2043             | Insertion/209bp   |
| NODE_13.Length     | 3544                 | chrUn_K1270466v1    | 2365             | Insertion/83bp    |
| NODE_87.Length     | 288                  | chr5                | 49658457         | Deletion/70bp     |
| NODE_87.Length     | 915                  | chr17               | 21970045         | Deletion/105bp    |
| NODE_924.Length    | 339                  | chr4                | 49098632         | Deletion/111bp    |
| NODE_616.Length    | 413                  | chr1                | 25768178         | Deletion/149bp    |
| NODE_580.Length    | 344                  | chr4                | 49099911         | Deletion/59bp     |
| NODE_710.Length    | 358                  | chrUn_K1270337v1    | 600              | Deletion/125bp    |
| NODE_410.Length    | 134                  | chrY                | 10632157         | Insertion/50bp    |
| NODE_410.Length    | 306                  | chrY                | 10632329         | Deletion/81bp     |
| NODE_391.Length    | 248                  | chr4                | 49710486         | Deletion/125bp    |
| NODE_391.Length    | 249                  | chr4                | 49710773         | Deletion/201bp    |
| NODE_391.Length    | 307                  | chrUn_K1270337v1    | 604              | Deletion/124bp    |
| NODE_391.Length    | 291                  | chrUn_K1270333v1    | 1232             | Deletion/209bp    |
| NODE_374.Length    | 455                  | chrUn_K1270337v1    | 533              | Deletion/84bp     |
| NODE_374.Length    | 353                  | chr4                | 49711162         | Deletion/132bp    |
| NODE_735.Length    | 451                  | chr4                | 49123333         | Deletion/51bp     |
| NODE_27.Length     | 509                  | chrUn_K1270438v1    | 103623           | Deletion/75bp     |
| NODE_839.Length    | 118                  | chr1                | 790308           | Deletion/69bp     |
| NODE_81.Length     | 417                  | chr9                | 67594596         | Deletion/288bp    |
| NODE_81.Length     | 417                  | chr9                | 61532860         | Deletion/215bp    |
| NODE_81.Length     | 425                  | chr9                | 65463304         | Deletion/215bp    |
| NODE_81.Length     | 625                  | chr4                | 3568981          | Deletion/172bp    |
| NODE_81.Length     | 642                  | chr9                | 61993836         | Deletion/288bp    |
| NODE_81.Length     | 635                  | chr9                | 41782387         | Deletion/217bp    |
| NODE_202.Length    | 168                  | chr16               | 34064755         | Deletion/64bp     |
| NODE_127.Length    | 157                  | chr4                | 49710321         | Deletion/74bp     |
| NODE_33.Length     | 219                  | chr21               | 8247460          | Insertion/95bp    |
| NODE_33.Length     | 168                  | chr21               | 8430433          | Insertion/95bp    |
| NODE_238.Length    | 622                  | chr17               | 26939834         | Deletion/51bp     |
| NODE_704.Length    | 369                  | chr4                | 49710855         | Deletion/76bp     |
| NODE_704.Length    | 293                  | chr4                | 49710493         | Deletion/84bp     |
| NODE_63.Length     | 937                  | chr5                | 49602538         | Deletion/75bp     |
| NODE_526.Length    | 200                  | chrY                | 56826320         | Deletion/50bp     |
| NODE_287.Length    | 390                  | chrUn_K1270333v1    | 960              | Deletion/118bp    |
| NODE_287.Length    | 150                  | chr4                | 49709516         | Deletion/84bp     |
| NODE_287.Length    | 341                  | chr4                | 49710487         | Deletion/83bp     |
| NODE_287.Length    | 224                  | chr4                | 49711235         | Deletion/50bp     |
| NODE_107.Length    | 445                  | chr5                | 49601917         | Deletion/55bp     |
| NODE_198.Length    | 268                  | chr4                | 49709626         | Deletion/66bp     |
| NODE_549.Length    | 135                  | chr4                | 49113665         | Deletion/54bp     |
| NODE_549.Length    | 124                  | chr4                | 49125466         | Deletion/64bp     |
| NODE_225.Length    | 299                  | chr5                | 49666503         | Insertion/55bp    |
| NODE_225.Length    | 167                  | chr5                | 49659485         | Insertion/55bp    |
| NODE_752.Length    | 187                  | chr4                | 49709987         | Deletion/83bp     |
| NODE_752.Length    | 257                  | chrUn_K1270336v1    | 215              | Insertion/84bp    |
| NODE_113.Length    | 381                  | chr1                | 20023491         | Deletion/298bp    |
| NODE_275.Length    | 444                  | chr8                | 43238155         | Deletion/90bp     |
| NODE_122.Length    | 639                  | chr2                | 89814801         | Deletion/75bp     |
| NODE_834.Length    | 127                  | chr4                | 49100353         | Insertion/60bp    |
| NODE_705.Length    | 272                  | chrUn_K1270337v1    | 598              | Deletion/84bp     |
| NODE_705.Length    | 297                  | chrUn_K1270333v1    | 1511             | Deletion/84bp     |
| NODE_68.Length     | 701                  | chr5                | 49666905         | Deletion/55bp     |
| NODE_68.Length     | 519                  | chr5                | 49602440         | Insertion/54bp    |
| NODE_342.Length    | 205                  | chr22               | 16347120         | Deletion/90bp     |
| NODE_541.Length    | 318                  | chr2                | 89839843         | Deletion/55bp     |
| NODE_728.Length    | 317                  | chr17               | 21960016         | Deletion/64bp     |
| NODE_433.Length    | 305                  | chr5                | 49659267         | Deletion/70bp     |
| NODE_14.Length     | 930                  | chr2_K1270772v1.alt | 3765             | Deletion/222bp    |
| NODE_14.Length     | 930                  | chr2_K1270772v1.alt | 10428            | Deletion/199bp    |
| NODE_14.Length     | 1796                 | chr2_K1270894v1.alt | 203525           | Deletion/199bp    |
| NODE_14.Length     | 1796                 | chr2_K1270894v1.alt | 210165           | Deletion/222bp    |
| NODE_14.Length     | 1796                 | chr2                | 90391878         | Deletion/199bp    |
| NODE_14.Length     | 1796                 | chr2                | 90398518         | Deletion/222bp    |
| NODE_216.Length    | 253                  | chr4                | 49709500         | Deletion/74bp     |
| NODE_857.Length    | 450                  | chr15               | 91749847         | Deletion/72bp     |
| NODE_29.Length     | 1073                 | chr1                | 143213352        | Deletion/468bp    |
| NODE_507.Length    | 294                  | chr16               | 88054080         | Deletion/51bp     |
| NODE_507.Length    | 294                  | chr16               | 88053468         | Deletion/51bp     |
| NODE_891.Length    | 205                  | chr10               | 41908998         | Insertion/55bp    |
| NODE_891.Length    | 212                  | chr10               | 41915397         | Deletion/54bp     |
| NODE_891.Length    | 216                  | chr10               | 41895560         | Insertion/65bp    |
| NODE_799.Length    | 201                  | chr20               | 31157353         | Deletion/55bp     |
| NODE_20.Length     | 693                  | chr4                | 49710323         | Deletion/76bp     |
| NODE_20.Length     | 395                  | chrUn_K1270333v1    | 769              | Deletion/112bp    |
| NODE_20.Length     | 1210                 | chrUn_K1270333v1    | 1300             | Deletion/83bp     |
| NODE_20.Length     | 2098                 | chrUn_K1270333v1    | 2188             | Deletion/84bp     |
| NODE_20.Length     | 818                  | chr4                | 49709868         | Deletion/242bp    |
| NODE_20.Length     | 1787                 | chr4                | 49710837         | Deletion/160bp    |
| NODE_20.Length     | 616                  | chrUn_K1270333v1    | 545              | Insertion/160bp   |
| NODE_20.Length     | 1960                 | chrUn_K1270333v1    | 1889             | Insertion/160bp   |
| NODE_20.Length     | 1226                 | chr4                | 49709940         | Insertion/85bp    |
| NODE_323.Length    | 150                  | chr2                | 130070169        | Insertion/127bp   |
| NODE_323.Length    | 437                  | chr2                | 130662072        | Insertion/79bp    |
| NODE_323.Length    | 328                  | chr2                | 131268767        | Insertion/139bp   |

### 3.8 Comparison of detection performance between LongRepMark and RepeatMasker

LongRepMarker can discover some new repetition types that RepeatMasker cannot find. In order to prove this conclusion, we conducted two specific experiments: 1) classify the detection results of the two tools by RepeatModeler2, and then compare the classification results, and 2) repetitive fragments in LongRepMarker's detection results covered by the detection results of RepeatMasker are removed, and then the remaining fragments are classified in detail by RepeatModeler2. Those two specific experiments are carried on the three species of *Drosophila*, *Ant* and *Human-chr14*. In order to fully demonstrate the high specificity of repeat sequences detected by LongRepMarker, the working mode of it is set to *de novo*, and its input is sequencing reads. The input of RepeatMasker can only be the reference genome of species, because it only supports the reference sequence as input.

The detailed steps of experiment 1 are as follows: 1) input the reference sequence into RepeatMasker to get the masked sequences; 2) extract the masked sequences as the repetitive sequences; 3) input the sequencing reads into LongRepMarker to obtain the repeated sequences; 4) classify the repetitive sequences generated from the two tools by RepeatModeler2; 5) compare the classification results. The detailed steps of experiment 2 are as follows: 1) input the reference sequence into RepeatMasker to get the masked sequences; 2) extract the masked sequences as the repetitive sequences; 3) input the sequencing reads into LongRepMarker to obtain the repeated sequences; 4) remove the repetitive fragments in LongRepMarker's detection results that can be covered by the detection results of RepeatMasker; 5) classify the remaining repetitive sequences in LongRepMarker's detection results; 6) Analyze the classification results. Some results of experiments 1 and 2 are shown in Table S61 and Table S62, respectively.

Table S61. Results of experiment 1.

| species     | LongRepMarker |               |        | RepeatMasker  |               |        |
|-------------|---------------|---------------|--------|---------------|---------------|--------|
|             | Main class    | Sub-class     | amount | Main class    | Sub-class     | amount |
| Drosophila  | LTR           | Ngaro         | 1      | LTR           | Ngaro         | 0      |
|             | LTR           | Gypsy         | 560    | LTR           | Gypsy         | 171    |
|             | LTR           | Pao           | 130    | LTR           | Pao           | 5      |
|             | Other         | None          | 130    | Other         | None          | 0      |
|             | LINE          | Jockey        | 94     | LINE          | Jockey        | 52     |
|             | LINE          | L-Jockey      | 152    | LINE          | L-Jockey      | 62     |
|             | LINE          | R1-LOA        | 11     | LINE          | R1-LOA        | 0      |
|             | LINE          | R2            | 2      | LINE          | R2            | 0      |
|             | Satellite     | None          | 764    | Satellite     | None          | 4      |
|             | DNA           | P             | 101    | DNA           | P             | 1      |
|             | DNA           | Tc-Mar-Tc1    | 17     | DNA           | Tc-Mar-Tc1    | 5      |
|             | DNA           | hAT-hATm      | 2      | DNA           | hAT-hATm      | 0      |
|             | DNA           | IS            | 1      | DNA           | IS            | 0      |
|             | DNA           | MULE-NOF      | 4      | DNA           | MULE-NOF      | 0      |
| DNA         | hAT-hobo      | 4             | DNA    | hAT-hobo      | 0             |        |
| Ant         | RC?           | Helitron      | 2      | RC?           | Helitron      | 0      |
|             | LTR           | Gypsy         | 145    | LTR           | Gypsy         | 17     |
|             | LTR           | Pao           | 69     | LTR           | Pao           | 17     |
|             | LTR           | DIRS          | 1      | LTR           | DIRS          | 0      |
|             | LTR           | ERVK          | 1      | LTR           | ERVK          | 0      |
|             | LTR           | Other         | 1      | LTR           | Other         | 0      |
|             | LINE          | Penelope      | 172    | LINE          | Penelope      | 5      |
|             | LINE          | I             | 6      | LINE          | I             | 0      |
|             | LINE          | R2-NeSL       | 11     | LINE          | R2-NeSL       | 0      |
|             | LINE          | Tad1          | 1      | LINE          | Tad1          | 0      |
|             | DNA           | Maverick      | 136    | DNA           | Maverick      | 4      |
|             | DNA           | Kolobok-T2    | 97     | DNA           | Kolobok-T2    | 26     |
|             | DNA           | TcMar-Tc1     | 227    | DNA           | TcMar-Tc1     | 136    |
|             | DNA           | Kolobok-Hydra | 5      | DNA           | Kolobok-Hydra | 0      |
| DNA         | MULE-NOF      | 14            | DNA    | MULE-NOF      | 0             |        |
| DNA         | Crypton-V     | 6             | DNA    | Crypton-V     | 0             |        |
| DNA         | hAT-hAT19     | 3             | DNA    | hAT-hAT19     | 0             |        |
| DNA         | TcMar-ISRm11  | 1             | DNA    | TcMar-ISRm11  | 0             |        |
| DNA         | CMC-Transib   | 7             | DNA    | CMC-Transib   | 0             |        |
| DNA         | MuLE-MuDR     | 1             | DNA    | MuLE-MuDR     | 0             |        |
| DNA         | MuLE-NOF      | 2             | DNA    | MuLE-NOF      | 0             |        |
| DNA         | PIF-ISL2EU    | 1             | DNA    | PIF-ISL2EU    | 0             |        |
| DNA         | PIF-Spy       | 5             | DNA    | PIF-Spy       | 0             |        |
| DNA         | CMC-Chapaev-3 | 5             | DNA    | CMC-Chapaev-3 | 0             |        |
| DNA         | PiggyBac      | 3             | DNA    | PiggyBac      | 0             |        |
| DNA         | TcMar-Cweed   | 1             | DNA    | TcMar-Cweed   | 0             |        |
| DNA         | IS            | 1             | DNA    | IS            | 0             |        |
| Human-chr14 | LINE          | L1            | 17221  | LINE          | L1            | 16970  |
|             | Satellite     | None          | 70     | Satellite     | None          | 15     |
|             | Satellite     | centromeric   | 100    | Satellite     | centromeric   | 1      |
|             | DNA           | Ginger        | 7      | DNA           | Ginger        | 0      |
|             | DNA           | Novosib       | 3      | DNA           | Novosib       | 0      |
|             | DNA           | Zisupton      | 3      | DNA           | Zisupton      | 0      |
|             | DNA           | Sola-1        | 2      | DNA           | Sola-1        | 0      |
|             | DNA           | Sola-3        | 5      | DNA           | Sola-3        | 0      |

Table S62. Results of experiment 2.

| Drosophila    |              |        | Ant           |               |        | Human-chr14   |             |        |
|---------------|--------------|--------|---------------|---------------|--------|---------------|-------------|--------|
| Main class    | Sub-class    | amount | Main class    | Sub-class     | amount | Main class    | Sub-class   | amount |
| LTR           | Pao          | 136    | LTR           | Gypsy         | 152    | LTR           | ERV1-MaLR   | 2      |
| LTR           | Gypsy        | 613    | LTR           | Pao           | 64     | LTR           | ERV1        | 4      |
| LTR           | Copia        | 40     | -             | -             | -      | LTR           | Gypsy       | 6      |
| LTR           | Other        | 2      | -             | -             | -      | LTR           | Pao         | 1      |
| -             | -            | -      | -             | -             | -      | LTR           | Copia       | 4      |
| -             | -            | -      | -             | -             | -      | LTR           | ERVK        | 1      |
| -             | -            | -      | -             | -             | -      | LTR           | ERV1        | 1      |
| LINE          | R1           | 169    | LINE          | Penelope      | 175    | LINE          | L1          | 7      |
| LINE          | R1-LOA       | 13     | -             | -             | -      | LINE          | R2-NeSL     | 1      |
| LINE          | Jockey       | 107    | -             | -             | -      | LINE          | L2          | 3      |
| LINE          | L-Jockey     | 156    | -             | -             | -      | -             | -           | -      |
| LINE          | CR1          | 22     | -             | -             | -      | -             | -           | -      |
| LINE          | I            | 29     | -             | -             | -      | -             | -           | -      |
| LINE          | LOA          | 19     | -             | -             | -      | -             | -           | -      |
| LINE          | R2           | 1      | -             | -             | -      | -             | -           | -      |
| LINE          | L2           | 1      | -             | -             | -      | -             | -           | -      |
| DNA           | TcMar-Pogo   | 5      | DNA           | Maverick      | 151    | DNA           | MULE-MuDR   | 1      |
| DNA           | P            | 97     | DNA           | Kolobok-T2    | 90     | DNA           | hAT-Charlie | 3      |
| DNA           | hAT-Ac       | 4      | DNA           | TcMar-Mariner | 136    | DNA           | PiggyBac    | 1      |
| DNA           | MULE-NOF-NOF | 4      | DNA           | TcMar-Tc1     | 182    | DNA           | CMC-EnSpm   | 2      |
| DNA           | hAT-hATm     | 2      | -             | -             | -      | DNA           | MuLE-MuDR   | 1      |
| DNA           | TcMar-Tc1    | 18     | -             | -             | -      | DNA           | Ginger      | 1      |
| DNA           | CMC-Transib  | 7      | -             | -             | -      | DNA           | Other       | 1      |
| DNA           | hAT-hobo     | 5      | -             | -             | -      | -             | -           | -      |
| DNA           | IS           | 1      | -             | -             | -      | -             | -           | -      |
| RC            | Helitron     | 10     | RC            | Helitro       | 29     | -             | -           | -      |
| -             | -            | -      | -             | -             | -      | SINE          | MIR         | 2      |
| rRNA          | -            | 7      | -             | -             | -      | -             | -           | -      |
| -             | -            | -      | -             | -             | -      | scRNA         | -           | 1      |
| Simple_repeat | -            | 21     | Simple_repeat | -             | 4      | Simple_repeat | -           | 2      |
| Satellite     | -            | 382    | -             | -             | -      | Satellite     | telomeric   | 1      |
| Unknown       | -            | 3568   | Unknown       | -             | 10046  | Unknown       | -           | 2551   |

The results in Tables S61 and S62 show that LongRepMarker can find some new repetitive sequence types that cannot be found by RepeatMasker. For example, the results in Table S61 show that the former

tool found DNA transposon elements such as hAT-hATm, IS, MULE-NOF and hAT-hobo on the *Drosophila* dataset, but these are not found by latter tool. In addition, according to the number of repeats in some categories, LongRepMarker can find more repeats than the latter tool under the same conditions. For example, LongRepMarker found 277 DNA transposon elements with subclass name *tcmar-tc1* in ant dataset, while RepeatMasker only found 136 such elements. Further more, it can be seen from the results shown in Table S62 that LongRepMarker can find many unique repetitive sequences which do not appear in RepeatMasker's detection results at all. For example, LINE elements such as R1, R1-LOA, Jockey, I-Jockey, CR1, I, LOA, R2 and L2 on the *Drosophila* dataset only appear in the detection results of LongRepMarker.

## 4 Conclusion

Numerous studies have shown that the repetitive elements in genomes play an indispensable role in the evolution, inheritance, variation, gene expression, transcriptional regulation, chromosome construction, and physiological metabolism of organisms, and they are one of the principal causes of genomic instability. Most existing detection methods cannot achieve satisfactory performance on identifying repeats in terms of both accuracy and size, since NGS reads are too short to identify long repeats whereas SMS long reads are with high error rates.

In this study, we present a novel identification framework, LongRepMarker, based on the global *de novo* assembly of Illumina short paired-end reads and barcode linked reads or SMS long reads, and the *k-mer*-based multiple sequence alignment for precisely marking long repetitive sequences in genomes. LongRepMarker provides five different working modes: 1) the reference-assisted mode, which can quickly and accurately derive a repeat library for some large species when the reference genomes are provided. 2) the *de novo* mode, which consists of 4 sub-modes (*de novo* mode based on only NGS short reads, *de novo* mode based on NGS short reads + barcode linked reads, *de novo* mode based on NGS short reads + SMS long reads and *de novo* mode based on only SMS long reads) and can identify the repeats in the genomes to a greater extent by assembling mixed sequencing reads of different spans. Among them, the *de novo* mode based on only SMS long reads is one of the few methods that only rely on the third generation sequencing reads for repetitive sequences detection, and has the advantages of low memory consumption, high speed and high detection accuracy. The experimental results show that LongRepMarker can not only identify the repetitive sequences comprehensively, accurately and rapidly in the reference-assisted mode, but also achieve more satisfactory results than most existing *de novo* detection methods.

## 5 ACKNOWLEDGEMENTS

This work has been supported by the National Natural Science Foundation of China under Grant: No.62002388, No.61772557, No.61732009, Hunan Provincial Science and technology Program (No. 2018wk4001), 111 Project (No. B18059), and King Abdullah University of Science and Technology (KAUST) Office of Sponsored Research (OSR) under award numbers BAS/1/1624-01, FCC/1/1976-18-01, FCC/1/1976-23-01, FCC/1/1976-25-01, FCC/1/1976-26-01, REI/1/0018-01-01, REI/1/4216-01-01, REI/1/4437-01-01, REI/1/4473-01-01, and URF/1/4098-01-01.

## References

1. Kazazian, H.H., "Mobile elements: drivers of genome evolution," *science*, vol. 303, no. 5664, pp. 1626-1632, 2004.
2. Liao X., Li M., Zou Y., et al., "Improving de novo assembly based on read classification," *IEEE/ACM Trans Comput Biol Bioinform*, vol. 17, no. 1, pp. 177-188, 2018.
3. Treangen T. J. and Salzberg S. L., "Repetitive DNA and next-generation sequencing: computational challenges and solutions," *Nature Reviews Genetics*, vol. 13, no. 1, pp. 36, 2012.
4. Lu Q., Wallrath L. L., Granok H., et al., " $(CT)_n$   $(GA)_n$  repeats and heat shock elements have distinct roles in chromatin structure and transcriptional activation of the *Drosophila* hsp26 gene," *Molecular and Cellular Biology*, vol. 13, no. 5, pp. 2802-2814, 1993.
5. Kundu T.K. and MRS R., "CpG islands in chromatin organization and gene expression," *The Journal of Biochemistry*, vol. 125, no. 2, pp. 217-222, 1999.
6. Shapiro J. A. and Von Sternberg R., "Why repetitive DNA is essential to genome function," *Biological Reviews*, vol. 80, no. 2, pp. 227-250, 2005.
7. Kaltenecker E., Leng S. and Heyl A., "The effects of repeated whole genome duplication events on the evolution of cytokinin signaling pathway," *BMC evolutionary biology*, vol. 18, no. 1, pp. 76, 2018.
8. Lu S., Wang G., Bacolla A., et al., "Short inverted repeats are hotspots for genetic instability: relevance to cancer genomes," *Cell reports*, vol. 10, no. 10, pp. 1674-1680, 2015.
9. Pavlicek A., Kapitonov V.V. and Jurka J., "Human Repetitive DNA," *Encyclopedic Reference of Genomics and Proteomics in Molecular Medicine*, Springer Inc, Berlin, Heidelberg, 2005.
10. Gary B., "Tandem repeats finder: a program to analyze DNA sequences," *Nucleic Acids Research*, Vol. 27, no. 2, pp. 573-580, 1999.
11. Borstnik B. and Pumpernik D., "Tandem repeats in protein coding regions of primate genes," *Genome Research*, vol. 12, no. 6, pp. 909-915, 2002.
12. Acharya S., "Chapter 19 - Introduction to Human Genetics," *Clinical and Translational Science*, Elsevier Inc, pp. 265-287, 2009.
13. Wicker, T., Sabot, F., Hua-Van, A., et al., "A unified classification system for eukaryotic transposable elements". *Nat Rev Genet*, Vol. 8, pp. 973-982, 2007.
14. Du, D., Du, X., Mattia, M. R., et al., "LTR retrotransposons from the *Citrus x clementina* genome: characterization and application". *Tree Genetics & Genomes*, Vol. 14, no. 43, 2018.
15. Schmidt T., "LINEs, SINEs and repetitive DNA: non-LTR retrotransposons in plant genomes," *Plant Mol Biol*, vol. 40, no. 6, pp. 903-910, 1999.
16. Wang W., Lin C., Lu D., et al., "Chromosomal transposition of PiggyBac in mouse embryonic stem cells," *Proc Natl Acad Sci USA*, vol. 105, no. 27, pp. 9290-9295, 2008.
17. Smit, A. F. A., Hubley, R. and Green, P., "RepeatMasker Open-4.0," Google Scholar, 2015.
18. Tarailo-Graovac M. and Chen N., "Using RepeatMasker to identify repetitive elements in genomic sequences," *Current protocols in bioinformatics*, vol. 25, no. 1, pp. 4.10.1-4.10.14, 2009.
19. Tempel S., "Using and understanding RepeatMasker," *Mobile Genetic Elements*, Humana Press, pp. 29-51, 2012.

20. Jurka J., Klonowski P., Dagman V., et al., "CENSOR-a program for identification and elimination of repetitive elements from DNA sequences," *Computers & chemistry*, vol. 20, no. 1, pp. 119-121, 1996.
21. Kennedy R. C., "Identification and annotation of transposable elements and agent-and gis-based modeling of pathogen transmission," University of Notre Dame, 2011.
22. Bedell J. A., Korf I. and Gish W., "MaskerAid: a performance enhancement to RepeatMasker," *Bioinformatics*, vol. 16, no. 11, pp. 1040-1041, 2000.
23. Li X., Kahveci T. and Settles A. M., "A novel genome-scale repeat finder geared towards transposons," *Bioinformatics*, vol. 24, no.4 , pp. 468-476, 2007.
24. Fiston-Lavier A. S., Carrigan M., Petrov D. A., et al., "T-lex: a program for fast and accurate assessment of transposable element presence using next-generation sequencing data," *Nucleic acids research*, vol. 39, no. 6, pp. e36-e36, 2010.
25. Jiang N., "Overview of repeat annotation and de novo repeat identification," *Plant Transposable Elements*, Humana Press, Totowa, NJ, pp. 275-287, 2013.
26. Ellinghaus D., Kurtz S. and Willhoeft U., "LTRharvest, an efficient and flexible software for de novo detection of LTR retrotransposons," *BMC bioinformatics*, vol. 9, no. 1, pp. 18, 2008.
27. Darzentas N., Bousios A., Apostolidou V., et al., "MASiVE: Mapping and Analysis of SireVirus Elements in plant genome sequences," *Bioinformatics*, vol. 26, no. 19, pp. 2452-2454, 2010.
28. Rho M, Choi J H, Kim S, et al., "De novo identification of LTR retrotransposons in eukaryotic genomes," *BMC Genomics*, vol. 8, no. 1, pp. 90, 2007.
29. Tu Z., Li S. and Mao C., "The changing tails of a novel short interspersed element in *Aedes aegypti*: genomic evidence for slippage retrotransposition and the relationship between 3' tandem repeats and the poly (dA) tail," *Genetics*, vol. 168, no. 4, pp. 2037-2047, 2004.
30. Han Y. and Wessler S. R., "MITE-Hunter: a program for discovering miniature inverted-repeat transposable elements from genomic sequences," *Nucleic acids research*, vol. 38, no. 22, pp. e199-e199, 2010.
31. Ye C., Ji G. and Liang C., "detectMITE: A novel approach to detect miniature inverted repeat transposable elements in genomes," *Sci Rep*, vol. 6, pp. 19688, 2016.
32. Zhijian T., "Eight novel families of miniature inverted repeat transposable elements in the African malaria mosquito *Anopheles gambiae*," *Proceedings of the National Academy of Sciences*, vol. 98, no. 4, pp. 1699-1704, 2001.
33. Chen Y., Zhou F., Li G. and Xu Y., "MUST: a system for identification of miniature inverted-repeat transposable elements and applications to *Anabaena variabilis* and *Haloquadratum walsbyi*," *Gene*, vol. 436, pp. 1-7, 2009.
34. Yang, G., "MITE Digger, an efficient and accurate algorithm for genome wide discovery of miniature inverted repeat transposable elements," *BMC Bioinformatics*, vol. 14, no. 186, 2013. <https://doi.org/10.1186/1471-2105-14-186>.
35. Crescente, J., Zavallo, D., Helguera, M. et al., "MITE Tracker: an accurate approach to identify miniature inverted-repeat transposable elements in large genomes," *BMC Bioinformatics*, vol. 19, no. 348, 2018. <https://doi.org/10.1186/s12859-018-2376-y>.
36. Shi J. and Liang C., "Generic Repeat Finder: A high-sensitivity tool for genome-wide de novo repeat detection," *Plant physiology*, vol. 180, no. 4, pp. 1803-1815, 2019.
37. Agarwal P., "The Repeat Pattern Toolkit (RPT): analyzing the structure and evolution of the *C. elegans* genome," *International Conference on Intelligent Systems for Molecular Biology*, vol. 2, pp. 1-9, 1994.
38. Chen G. L., Chang Y. J. and Hsueh C. H., "PRAP: an ab initio software package for automated genome-wide analysis of DNA repeats for prokaryotes," *Bioinformatics*, vol. 29, no.21, pp. 2683-2689, 2013.
39. Edgar R. C. and Myers E. W., "PILER: identification and classification of genomic repeats," *Bioinformatics*, vol. 21, no. suppl\_1, pp. i152-i158, 2005.
40. Nicolas J., Peterlongo P. and Tempel S., "Finding and characterizing repeats in plant genomes," *Plant Bioinformatics*, Humana Press, pp. 293-337, 2016.
41. Ye C., Ji G. and Liang C., "detectMITE: A novel approach to detect miniature inverted repeat transposable elements in genomes," *Scientific reports*, vol. 6, pp. 19688, 2016.
42. Rodrigo L., Ville S., Stephen R., Asif K., Warren G., "WU-Blast2 server at the European Bioinformatics Institute," *Nucleic Acids Research*, vol. 31, no. 13, pp. 3795C3798, 2003.
43. Chen N., "Using Repeat Masker to identify repetitive elements in genomic sequences," *Current protocols in bioinformatics*, vol. 25, no.1, pp. 4.10.1-4.10.14, 2004.
44. Ou S., Su W., Liao Y., Chougule K., Agda JRA., Hellinga AJ., Lugo CSB., Elliott TA., Ware D., Peterson T., Jiang N., Hirsch CN. and Hufford MB., "Benchmarking transposable element annotation methods for creation of a streamlined, comprehensive pipeline," *Genome Biol*, vol. 20, no. 1, pp. 275, 2019.
45. Surya S., Susan B., Zenaida V. M. and Daniel G. P., "Empirical comparison of ab initio repeat finding programs," *Nucleic Acids Research*, vol. 36, no. 7, pp. 2284C2294, 2008.
46. Price A. L., Jones N. C. and Pevzner P. A., "De novo identification of repeat families in large genomes," *Bioinformatics*, vol. 21, no. suppl\_1, pp. i351-i358, 2005.
47. Li R., Ye J., Li S., Wang J., Han Y., Ye C., Wang J., Yang H., Yu J., Wong GK. and Wang J., "ReAS: Recovery of ancestral sequences for transposable elements from the unassembled reads of a whole genome shotgun," *PLoS Comput Biol*, vol. 1, no. 4, pp. e43, 2005.
48. Shi J. and Liang C., "Generic Repeat Finder: A High-Sensitivity Tool for Genome-Wide De Novo Repeat Detection," *Plant Physiol*, vol. 180, no. 4, pp. 1803-1815, 2019.
49. Flynn JM., Hubley R., Goubert C., Rosen J., Clark AG., Feschotte C. and Smit AF., "RepeatModeler2 for automated genomic discovery of transposable element families," *Proc Natl Acad Sci USA*, vol. 117, no.17, pp. 9451-9457, 2020.
50. Ellinghaus D., Kurtz S., Willhoeft U., "LTRharvest, an efficient and flexible software for de novo detection of LTR retrotransposons," *BMC Bioinformatics*, vol. 9, pp. 18, 2008.
51. Ou S. and Jiang N., "LTR\_retriever: A Highly Accurate and Sensitive Program for Identification of Long Terminal Repeat Retrotransposons," *Plant Physiol*, vol. 176, no. 2, pp. 1410-1422, 2018.
52. Zhao X. and Hao W., "LTR.FINDER: an efficient tool for the prediction of full-length LTR retrotransposons," *Nucleic Acids Research*, vol. 35, no. suppl\_2, pp. W265CW268, 2007.
53. Su W., Gu X. and Peterson T., "TIR-Learner, a New Ensemble Method for TIR Transposable Element Annotation, Provides Evidence for Abundant New Transposable Elements in the Maize Genome," *Mol Plant*, vol. 12, no. 3, pp. 447-460, 2019.
54. Xiong W., He L., Lai J., Dooner HK. and Du C., "HelitronScanner uncovers a large overlooked cache of Helitron transposons in many plant genomes," *Proc Natl Acad Sci USA*, vol. 111, no. 28, pp. 10263-8, 2014.
55. Koch P., Platzer M. and Downie B. R., "RepARK-de novo creation of repeat libraries from whole-genome NGS reads," *Nucleic acids research*, vol. 42, no. 9, pp. e80-e80, 2014.
56. Chu C., Nielsen R. and Wu Y., "REPdenovo: inferring de novo repeat motifs from short sequence reads," *PLoS one*, vol. 11, no. 3, pp. e0150719, 2016.
57. Guo R, Li Y R, He S, et al., "RepLong: de novo repeat identification using long read sequencing data," *Bioinformatics*, vol. 34, no. 7, pp. 1099-1107, 2017.

58. Gyorgy A., Norbert G., Luc D. and Wojciech M., "TEclassa tool for automated classification of unknown eukaryotic transposable elements," *Bioinformatics*, vol. 25, no. 10, pp. 1329C1330, 2009.
59. Liao X., Li M., Zou Y., et al., "Current challenges and solutions of de novo assembly," *Quantitative Biology*, vol. 7, no. 2, pp. 90-109, 2019.
60. Boetzer M, Pirovano W., "SSPACE-LongRead: scaffolding bacterial draft genomes using long read sequence information," *BMC bioinformatics*, vol. 15, no. 1, pp. 211, 2014.
61. Kamath G M, Shomorony I, Xia F, et al., "HINGE: long-read assembly achieves optimal repeat resolution," *Genome Research*, vol. 27, no. 5, pp. 747-756, 2017.
62. Bankevich A., Nurk S., Antipov D., et al. "SPAdes: a new genome assembly algorithm and its applications to single-cell sequencing," *Journal of computational biology*, vol. 19, no. 5, pp. 455-477, 2012.
63. Luo R, Liu B, Xie Y, et al., "SOAPdenovo2: an empirically improved memory-efficient short-read de novo assembler," *Gigascience*, vol. 1, no. 1, pp. 18, 2012.
64. Simpson J T, Wong K, Jackman S D, et al., "ABySS: a parallel assembler for short read sequence data," *Genome research*, vol. 19, no. 6. pp. 1117-1123, 2009.
65. Zerbino D R. and Birney E., "Velvet: algorithms for de novo short read assembly using de Bruijn graphs," *Genome research*, vol. 18, no. 5, pp. 821-829, 2008.
66. Peng Y, Leung H C M, Yiu S M, et al., "IDBA-UD: a de novo assembler for single-cell and metagenomic sequencing data with highly uneven depth," *Bioinformatics*, vol. 28, no.11, pp. 1420-1428, 2012.
67. Luo J., Wang J., Zhang Z., et al., "BOSS: a novel scaffolding algorithm based on an optimized scaffold graph," *Bioinformatics*, vol. 33, no. 2, pp. 169-176, 2017.
68. Coombe L., Warren R. L., Jackman S. D., et al., "Assembly of the complete Sitka spruce chloroplast genome using 10X Genomics GemCode sequencing data," *PLoS One*, vol. 11, no. 9, pp. e0163059, 2016.
69. Yeo S., Coombe L., Warren R. L., et al., "ARCS: scaffolding genome drafts with linked reads," *Bioinformatics*, vol. 34, no. 5, pp. 725-731, 2017.
70. Zhang H., Jain C., Aluru S., et al., "A comprehensive evaluation of long read error correction methods," *bioRxiv*, 2019.
71. Morisse P., Lecroq T., Lefebvre A., et al., "Long-read error correction: a survey and qualitative comparison," *bioRxiv*, 2020.
72. Choudhury O, Chakrabarty A, Emrich S J, et al., "HECIL: A Hybrid Error Correction Algorithm for Long Reads with Iterative Learning," *Scientific Reports*, vol. 8, no. 1 , pp. 1-9, 2018.
73. Salmela L. and Rivals E., "LoRDEC: accurate and efficient long read error correction," *Bioinformatics*, vol. 30, no. 24, pp. 3506-3514, 2014.
74. Bao E. and Lan L., "HALC: High throughput algorithm for long read error correction," *BMC Bioinformatics* vol. 18, no. 204, 2017.
75. Andrey D. P., Irina V., Anton B., et al., "ExSPAnDer: a universal repeat resolver for DNA fragment assembly," *Bioinformatics*, vol. 30, no. 12, pp. i293-i301, 2014.
76. Huptas C, Scherer S, Wenning M, et al. "Optimized Illumina PCR-free library preparation for bacterial whole genome sequencing and analysis of factors influencing de novo assembly," *BMC Research Notes*, vol. 9, no.1, pp. 269-269, 2016.
77. Huptas C., Scherer S., & Wenning M., "Optimized Illumina PCR-free library preparation for bacterial whole genome sequencing and analysis of factors influencing de novo assembly," *BMC Res Notes* vol. 9, no. 269, 2016.
78. Hamid M., Timothy J. Close S. L., "De novo meta-assembly of ultra-deep sequencing data," *Bioinformatics*, Vol. 31, no. 12, pp. i9-i16, 2005.
79. Souvorov A., Agarwala R. & Lipman D., "SKESA: strategic k-mer extension for scrupulous assemblies," *Genome Biol* vol. 19, no. 153, 2018.
80. Yahav T., and Privman E., "A comparative analysis of methods for de novo assembly of hymenopteran genomes using either haploid or diploid samples," *Sci Rep*, vol. 9, no. 6480, 2019.
81. M. E. J. Newman, "Modularity and community structure in networks," *Proceedings of the National Academy of Sciences*, vol. 103, no. 23, pp. 8577-8582, 2006.
82. Blondel, V. D. et al., "Fast unfolding of communities in large networks," *J. Stat. Mech. Theory Exp.*, pp. P10008, 2008.
83. Yang, Z., Algesheimer, R. & Tessone, C. A., "Comparative Analysis of Community Detection Algorithms on Artificial Networks," *Scientific Reports*, vol. 6, no. 1, pp. 30750, 2016.
84. Coombe L., Warren R. L., Jackman S. D., et al., "Assembly of the complete Sitka spruce chloroplast genome using 10X Genomics GemCode sequencing data," *PLoS One*, vol. 11, no. 9, pp. e0163059, 2016.
85. Yeo S., Coombe L., Warren R. L., and et al., "ARCS: scaffolding genome drafts with linked reads," *Bioinformatics*, vol. 34, no. 5, pp. 725-731, 2017.
86. Luo R, Sedlazeck F J, Darby C A, et al., "LRSim: a linked-reads simulator generating insights for better genome partitioning," *Computational and structural biotechnology journal*, vol. 15, pp. 478-484, 2017.
87. Sedlazeck FJ., Rescheneder P., Smolka M., et al., "Accurate detection of complex structural variations using single-molecule sequencing," *Nat Methods*, vol. 15, no. 6, pp. 461-468, 2018.
88. Li H., "Minimap2: pairwise alignment for nucleotide sequences," *Bioinformatics*, vol. 34, no. 18, pp. 3094-3100, 2018.
89. Guillaume M. and Carl K., "A fast, lock-free approach for efficient parallel counting of occurrences of k-mers," *Bioinformatics*, vol. 27, no. 6, pp. 764-770, 2011.
90. Rizk G., Lavenier D. and Chikhi R., "DSK: k-mer counting with very low memory usage," *Bioinformatics*, vol. 29, no. 5, pp. 652-653, 2013.
91. Deorowicz S, Kokot M, Grabowski S, et al. "KMC 2: fast and resource-frugal k-mer counting," *Bioinformatics*, vol. 31, no. 10, pp. 1569-1576, 2015.
92. Li H., Handsaker B., Wysoker A., et al., "The sequence alignment/map format and SAMtools," *Bioinformatics*, vol. 25, no. 16, pp.2078-2079, 2009.
93. James T. Robinson, Helga Thorvaldsdttir, Wendy Winckler, et al., "Integrative Genomics Viewer," *Nature Biotechnology* vol. 29, pp. 24C26, 2011.
